# Supplementary material
Source: publisher figshare collection journal article supplement (https://acs.figshare.com/ndownloader/files/4990768)
Supplement: Supplementary file 1 [file 4990768]

 
data_mo_molan356_0m_sq_sq
 
_audit_creation_method            SHELXL-2014
_chemical_name_systematic
;
 ?
;
_chemical_name_common             ?
_chemical_melting_point           ?
_chemical_formula_moiety          ?
_chemical_formula_sum
 'C28 H35 Fe0.50 N4.50' 
_chemical_formula_weight          462.53

loop_
 _atom_type_symbol
 _atom_type_description
 _atom_type_scat_dispersion_real
 _atom_type_scat_dispersion_imag
 _atom_type_scat_source
 'C'  'C'   0.0033   0.0016
 'International Tables Vol C Tables 4.2.6.8 and 6.1.1.4'
 'H'  'H'   0.0000   0.0000
 'International Tables Vol C Tables 4.2.6.8 and 6.1.1.4'
 'N'  'N'   0.0061   0.0033
 'International Tables Vol C Tables 4.2.6.8 and 6.1.1.4'
 'Fe'  'Fe'   0.3463   0.8444
 'International Tables Vol C Tables 4.2.6.8 and 6.1.1.4'
 
_space_group_crystal_system       monoclinic
_space_group_IT_number            13
_space_group_name_H-M_alt         'P 2/n'
_space_group_name_Hall            '-P 2yac'
 
_shelx_space_group_comment
;
The symmetry employed for this shelxl refinement is uniquely defined
by the following loop, which should always be used as a source of
symmetry information in preference to the above space-group names.
They are only intended as comments.
;
 
loop_
 _space_group_symop_operation_xyz
 'x, y, z'
 '-x+1/2, y, -z+1/2'
 '-x, -y, -z'
 'x-1/2, -y, z-1/2'
 
_cell_length_a                    12.1244(7)
_cell_length_b                    14.1187(8)
_cell_length_c                    18.1921(10)
_cell_angle_alpha                 90
_cell_angle_beta                  93.083(2)
_cell_angle_gamma                 90
_cell_volume                      3109.6(3)
_cell_formula_units_Z             4
_cell_measurement_temperature     100(2)
_cell_measurement_reflns_used      9899
_cell_measurement_theta_min        3.09
_cell_measurement_theta_max       27.12 
 
_exptl_crystal_description       'block'
_exptl_crystal_colour            'black'
_exptl_crystal_density_meas       ? 
_exptl_crystal_density_method     ?              
_exptl_crystal_density_diffrn     0.988          
_exptl_crystal_F_000              990
_exptl_transmission_factor_min    ?                                             
_exptl_transmission_factor_max    ?                                             
_exptl_crystal_size_max           0.410
_exptl_crystal_size_mid           0.330
_exptl_crystal_size_min           0.190
_exptl_absorpt_coefficient_mu     0.280
_shelx_estimated_absorpt_T_min    0.894
_shelx_estimated_absorpt_T_max    0.949
_exptl_absorpt_correction_type    multi-scan 
_exptl_absorpt_correction_T_min   0.6931   
_exptl_absorpt_correction_T_max   0.7455 
_exptl_absorpt_process_details    'SADABS' 
 
_exptl_special_details
;
 ?
;
 
_diffrn_ambient_temperature       100(2)
_diffrn_radiation_wavelength      0.71073
_diffrn_radiation_type            MoK\a
_diffrn_source                    ?                       
_diffrn_measurement_device_type  'Bruker APEX-II CCD'
_diffrn_measurement_method       '\f and \w scans' 
_diffrn_detector_area_resol_mean  ? 
_diffrn_reflns_number             62606
_diffrn_reflns_av_unetI/netI      0.0296
_diffrn_reflns_av_R_equivalents   0.0544
_diffrn_reflns_limit_h_min        -15
_diffrn_reflns_limit_h_max        14
_diffrn_reflns_limit_k_min        -18
_diffrn_reflns_limit_k_max        18
_diffrn_reflns_limit_l_min        -23
_diffrn_reflns_limit_l_max        23
_diffrn_reflns_theta_min          2.885
_diffrn_reflns_theta_max          27.103
_diffrn_reflns_theta_full         25.242
_diffrn_measured_fraction_theta_max   0.998
_diffrn_measured_fraction_theta_full  0.998
_diffrn_reflns_Laue_measured_fraction_max    0.998
_diffrn_reflns_Laue_measured_fraction_full   0.998
_diffrn_reflns_point_group_measured_fraction_max   0.998
_diffrn_reflns_point_group_measured_fraction_full  0.998
_reflns_number_total              6851
_reflns_number_gt                 5768
_reflns_threshold_expression      'I > 2\s(I)'
_reflns_Friedel_coverage          0.000
_reflns_Friedel_fraction_max      .
_reflns_Friedel_fraction_full     .
 
_reflns_special_details
;
 Reflections were merged by SHELXL according to the crystal
 class for the calculation of statistics and refinement.
 
 Structure factors included contributions from the .fab file.
 
 _reflns_Friedel_fraction is defined as the number of unique
 Friedel pairs measured divided by the number that would be
 possible theoretically, ignoring centric projections and
 systematic absences.
;
 
_computing_data_collection       'Bruker APEX2'
_computing_cell_refinement       'Bruker SAINT'
_computing_data_reduction        'Bruker SAINT'
_computing_structure_solution    'SHELXS-97 (Sheldrick 2008)'
_computing_structure_refinement  'SHELXL-2014 (Sheldrick 2014)'
_computing_molecular_graphics     ?
_computing_publication_material   ?
 
_refine_special_details
;
 ?
;
_refine_ls_structure_factor_coef  Fsqd
_refine_ls_matrix_type            full
_refine_ls_weighting_scheme       calc
_refine_ls_weighting_details
'w=1/[\s^2^(Fo^2^)+(0.0523P)^2^+5.4617P] where P=(Fo^2^+2Fc^2^)/3'
_atom_sites_solution_primary      ?
_atom_sites_solution_secondary    ?
_atom_sites_solution_hydrogens    geom
_refine_ls_hydrogen_treatment     constr
_refine_ls_extinction_method      none
_refine_ls_extinction_coef        .
_refine_ls_number_reflns          6851
_refine_ls_number_parameters      302
_refine_ls_number_restraints      0
_refine_ls_R_factor_all           0.0770
_refine_ls_R_factor_gt            0.0625
_refine_ls_wR_factor_ref          0.1496
_refine_ls_wR_factor_gt           0.1405
_refine_ls_goodness_of_fit_ref    1.132
_refine_ls_restrained_S_all       1.132
_refine_ls_shift/su_max           0.011
_refine_ls_shift/su_mean          0.002
 
loop_
 _atom_site_label
 _atom_site_type_symbol
 _atom_site_fract_x
 _atom_site_fract_y
 _atom_site_fract_z
 _atom_site_U_iso_or_equiv
 _atom_site_adp_type
 _atom_site_occupancy
 _atom_site_site_symmetry_order  
 _atom_site_calc_flag
 _atom_site_refinement_flags_posn
 _atom_site_refinement_flags_adp
 _atom_site_refinement_flags_occupancy
 _atom_site_disorder_assembly
 _atom_site_disorder_group
Fe1 Fe 0.2500 0.28335(3) 0.2500 0.01095(12) Uani 1 2 d S T P . .
N1 N 0.26702(16) 0.20029(13) 0.32889(10) 0.0124(4) Uani 1 1 d . . . . .
N2 N 0.32402(16) 0.21692(14) 0.39298(10) 0.0139(4) Uani 1 1 d . . . . .
N3 N 0.42334(16) 0.35479(14) 0.34988(10) 0.0131(4) Uani 1 1 d . . . . .
N4 N 0.36129(15) 0.36552(14) 0.28679(10) 0.0120(4) Uani 1 1 d . . . . .
N5 N 0.7500 0.2949(2) 0.2500 0.0149(6) Uani 1 2 d S T P . .
C1 C 0.2146(2) 0.10959(17) 0.33142(12) 0.0155(5) Uani 1 1 d . . . . .
C2 C 0.2683(2) 0.03266(18) 0.36539(14) 0.0203(5) Uani 1 1 d . . . . .
H2 H 0.3400 0.0405 0.3883 0.024 Uiso 1 1 calc R U . . .
C3 C 0.2177(2) -0.0549(2) 0.36594(16) 0.0273(6) Uani 1 1 d . . . . .
H3 H 0.2550 -0.1072 0.3889 0.033 Uiso 1 1 calc R U . . .
C4 C 0.1124(3) -0.0671(2) 0.33301(15) 0.0299(6) Uani 1 1 d . . . . .
H4 H 0.0779 -0.1275 0.3333 0.036 Uiso 1 1 calc R U . . .
C5 C 0.0582(2) 0.0094(2) 0.29971(15) 0.0288(6) Uani 1 1 d . . . . .
H5 H -0.0139 0.0014 0.2775 0.035 Uiso 1 1 calc R U . . .
C6 C 0.1087(2) 0.09730(19) 0.29868(13) 0.0206(5) Uani 1 1 d . . . . .
H6 H 0.0712 0.1494 0.2757 0.025 Uiso 1 1 calc R U . . .
C7 C 0.39642(18) 0.28867(17) 0.39846(12) 0.0129(4) Uani 1 1 d . . . . .
C8 C 0.46278(19) 0.29137(17) 0.46990(12) 0.0150(5) Uani 1 1 d . . . . .
C9 C 0.4579(2) 0.21816(19) 0.52105(14) 0.0209(5) Uani 1 1 d . . . . .
H9 H 0.4076 0.1674 0.5119 0.025 Uiso 1 1 calc R U . . .
C10 C 0.5257(2) 0.2184(2) 0.58548(14) 0.0233(5) Uani 1 1 d . . . . .
H10 H 0.5206 0.1678 0.6195 0.028 Uiso 1 1 calc R U . . .
C11 C 0.6006(2) 0.29137(19) 0.60083(13) 0.0212(5) Uani 1 1 d . . . . .
C12 C 0.6018(2) 0.36616(19) 0.55151(14) 0.0205(5) Uani 1 1 d . . . . .
H12 H 0.6501 0.4181 0.5617 0.025 Uiso 1 1 calc R U . . .
C13 C 0.5336(2) 0.36692(18) 0.48724(13) 0.0168(5) Uani 1 1 d . . . . .
H13 H 0.5355 0.4196 0.4548 0.020 Uiso 1 1 calc R U . . .
C14 C 0.6806(2) 0.2889(2) 0.66777(15) 0.0282(6) Uani 1 1 d . . . . .
H14A H 0.7544 0.2722 0.6526 0.042 Uiso 1 1 calc R U . . .
H14B H 0.6560 0.2414 0.7027 0.042 Uiso 1 1 calc R U . . .
H14C H 0.6830 0.3513 0.6914 0.042 Uiso 1 1 calc R U . . .
C15 C 0.39811(18) 0.44496(17) 0.24632(13) 0.0139(5) Uani 1 1 d . . . . .
C16 C 0.4680(2) 0.51409(18) 0.27828(14) 0.0191(5) Uani 1 1 d . . . . .
H16 H 0.4913 0.5093 0.3288 0.023 Uiso 1 1 calc R U . . .
C17 C 0.5037(2) 0.58943(19) 0.23696(15) 0.0245(6) Uani 1 1 d . . . . .
H17 H 0.5520 0.6353 0.2593 0.029 Uiso 1 1 calc R U . . .
C18 C 0.4695(2) 0.5986(2) 0.16330(15) 0.0254(6) Uani 1 1 d . . . . .
H18 H 0.4938 0.6506 0.1352 0.031 Uiso 1 1 calc R U . . .
C19 C 0.3994(2) 0.5311(2) 0.13135(14) 0.0228(6) Uani 1 1 d . . . . .
H19 H 0.3746 0.5374 0.0812 0.027 Uiso 1 1 calc R U . . .
C20 C 0.3650(2) 0.45423(19) 0.17161(13) 0.0181(5) Uani 1 1 d . . . . .
H20 H 0.3186 0.4075 0.1484 0.022 Uiso 1 1 calc R U . . .
C21 C 0.66137(19) 0.23336(18) 0.28234(13) 0.0164(5) Uani 1 1 d . . . . .
H21A H 0.5992 0.2748 0.2949 0.020 Uiso 1 1 calc R U . . .
H21B H 0.6330 0.1889 0.2437 0.020 Uiso 1 1 calc R U . . .
C22 C 0.6972(2) 0.1763(2) 0.35023(14) 0.0233(6) Uani 1 1 d . . . . .
H22A H 0.7123 0.2196 0.3924 0.028 Uiso 1 1 calc R U . . .
H22B H 0.7661 0.1415 0.3412 0.028 Uiso 1 1 calc R U . . .
C23 C 0.6071(2) 0.10623(19) 0.36863(14) 0.0206(5) Uani 1 1 d . . . . .
H23A H 0.5366 0.1408 0.3723 0.025 Uiso 1 1 calc R U . . .
H23B H 0.5971 0.0597 0.3281 0.025 Uiso 1 1 calc R U . . .
C24 C 0.6338(2) 0.0535(2) 0.44047(17) 0.0314(7) Uani 1 1 d . . . . .
H24A H 0.7020 0.0172 0.4365 0.047 Uiso 1 1 calc R U . . .
H24B H 0.5731 0.0104 0.4503 0.047 Uiso 1 1 calc R U . . .
H24C H 0.6435 0.0992 0.4809 0.047 Uiso 1 1 calc R U . . .
C25 C 0.80853(19) 0.35559(18) 0.30931(13) 0.0168(5) Uani 1 1 d . . . . .
H25A H 0.8408 0.3133 0.3482 0.020 Uiso 1 1 calc R U . . .
H25B H 0.8702 0.3894 0.2873 0.020 Uiso 1 1 calc R U . . .
C26 C 0.7357(2) 0.42774(18) 0.34476(13) 0.0184(5) Uani 1 1 d . . . . .
H26A H 0.6657 0.3974 0.3577 0.022 Uiso 1 1 calc R U . . .
H26B H 0.7177 0.4797 0.3096 0.022 Uiso 1 1 calc R U . . .
C27 C 0.7953(2) 0.4678(2) 0.41424(14) 0.0232(6) Uani 1 1 d . . . . .
H27A H 0.7972 0.4190 0.4533 0.028 Uiso 1 1 calc R U . . .
H27B H 0.8725 0.4831 0.4035 0.028 Uiso 1 1 calc R U . . .
C28 C 0.7395(2) 0.5566(2) 0.44213(16) 0.0273(6) Uani 1 1 d . . . . .
H28A H 0.6618 0.5428 0.4502 0.041 Uiso 1 1 calc R U . . .
H28B H 0.7437 0.6073 0.4056 0.041 Uiso 1 1 calc R U . . .
H28C H 0.7769 0.5769 0.4886 0.041 Uiso 1 1 calc R U . . .
 
loop_
 _atom_site_aniso_label
 _atom_site_aniso_U_11
 _atom_site_aniso_U_22
 _atom_site_aniso_U_33
 _atom_site_aniso_U_23
 _atom_site_aniso_U_13
 _atom_site_aniso_U_12
Fe1 0.0093(2) 0.0137(2) 0.0095(2) 0.000 -0.00240(16) 0.000
N1 0.0116(9) 0.0144(10) 0.0108(9) 0.0007(7) -0.0024(7) 0.0004(7)
N2 0.0126(9) 0.0185(10) 0.0106(9) 0.0003(8) -0.0003(7) 0.0033(8)
N3 0.0116(9) 0.0161(10) 0.0113(9) -0.0005(7) -0.0021(7) 0.0019(7)
N4 0.0097(9) 0.0147(9) 0.0114(9) -0.0008(7) -0.0008(7) -0.0009(7)
N5 0.0103(13) 0.0223(15) 0.0120(13) 0.000 0.0010(10) 0.000
C1 0.0160(11) 0.0191(12) 0.0112(10) -0.0002(9) -0.0002(9) -0.0019(9)
C2 0.0181(12) 0.0206(13) 0.0220(12) 0.0004(10) -0.0012(10) -0.0008(10)
C3 0.0337(16) 0.0199(13) 0.0279(14) 0.0030(11) -0.0028(12) 0.0006(11)
C4 0.0391(17) 0.0239(14) 0.0260(14) 0.0026(11) -0.0047(12) -0.0166(12)
C5 0.0234(14) 0.0392(17) 0.0229(13) 0.0056(12) -0.0083(11) -0.0150(12)
C6 0.0183(12) 0.0272(14) 0.0160(11) 0.0041(10) -0.0027(10) -0.0029(10)
C7 0.0101(10) 0.0156(11) 0.0132(10) -0.0030(9) 0.0019(8) 0.0011(9)
C8 0.0124(11) 0.0195(12) 0.0129(11) -0.0021(9) -0.0001(9) 0.0042(9)
C9 0.0209(12) 0.0222(13) 0.0188(12) 0.0002(10) -0.0055(10) -0.0009(10)
C10 0.0277(14) 0.0253(13) 0.0161(12) 0.0052(10) -0.0059(10) 0.0034(11)
C11 0.0192(12) 0.0296(14) 0.0142(11) -0.0043(10) -0.0051(9) 0.0058(11)
C12 0.0173(12) 0.0259(13) 0.0178(12) -0.0054(10) -0.0028(10) -0.0032(10)
C13 0.0152(11) 0.0221(13) 0.0131(11) -0.0002(9) -0.0011(9) -0.0006(9)
C14 0.0296(15) 0.0337(15) 0.0197(13) -0.0035(12) -0.0129(11) 0.0057(12)
C15 0.0090(10) 0.0167(11) 0.0163(11) 0.0000(9) 0.0024(9) 0.0043(9)
C16 0.0196(12) 0.0189(12) 0.0185(12) 0.0001(10) -0.0016(10) 0.0006(10)
C17 0.0243(14) 0.0202(13) 0.0287(14) -0.0002(11) -0.0009(11) -0.0042(11)
C18 0.0234(13) 0.0242(14) 0.0293(14) 0.0088(11) 0.0072(11) -0.0021(11)
C19 0.0191(13) 0.0326(15) 0.0167(12) 0.0070(11) 0.0028(10) 0.0010(11)
C20 0.0132(11) 0.0255(13) 0.0154(11) 0.0005(10) -0.0004(9) -0.0004(10)
C21 0.0095(11) 0.0227(13) 0.0173(11) -0.0014(9) 0.0028(9) -0.0041(9)
C22 0.0137(12) 0.0344(15) 0.0217(13) 0.0055(11) -0.0014(10) -0.0032(11)
C23 0.0162(12) 0.0233(13) 0.0224(13) 0.0012(10) 0.0013(10) -0.0017(10)
C24 0.0258(15) 0.0352(16) 0.0334(15) 0.0114(13) 0.0041(12) -0.0021(12)
C25 0.0116(11) 0.0249(13) 0.0138(11) -0.0013(9) -0.0020(9) -0.0030(9)
C26 0.0146(11) 0.0245(13) 0.0162(11) -0.0023(10) 0.0012(9) -0.0016(10)
C27 0.0187(13) 0.0289(14) 0.0219(13) -0.0048(11) 0.0001(10) -0.0044(11)
C28 0.0300(15) 0.0226(14) 0.0292(14) -0.0045(11) 0.0005(12) -0.0066(11)
 
_geom_special_details
;
 All esds (except the esd in the dihedral angle between two l.s. planes)
 are estimated using the full covariance matrix.  The cell esds are taken
 into account individually in the estimation of esds in distances, angles
 and torsion angles; correlations between esds in cell parameters are only
 used when they are defined by crystal symmetry.  An approximate (isotropic)
 treatment of cell esds is used for estimating esds involving l.s. planes.
;
 
loop_
 _geom_bond_atom_site_label_1
 _geom_bond_atom_site_label_2
 _geom_bond_distance
 _geom_bond_site_symmetry_2
 _geom_bond_publ_flag
Fe1 N1 1.8562(19) 2 ?
Fe1 N1 1.8563(19) . ?
Fe1 N4 1.8755(19) . ?
Fe1 N4 1.8755(19) 2 ?
N1 N2 1.344(3) . ?
N1 C1 1.432(3) . ?
N2 C7 1.341(3) . ?
N3 C7 1.338(3) . ?
N3 N4 1.347(3) . ?
N4 C15 1.426(3) . ?
N5 C25 1.523(3) . ?
N5 C25 1.523(3) 2_655 ?
N5 C21 1.524(3) 2_655 ?
N5 C21 1.524(3) . ?
C1 C2 1.394(3) . ?
C1 C6 1.397(3) . ?
C2 C3 1.381(4) . ?
C3 C4 1.391(4) . ?
C4 C5 1.387(4) . ?
C5 C6 1.385(4) . ?
C7 C8 1.492(3) . ?
C8 C9 1.394(3) . ?
C8 C13 1.395(3) . ?
C9 C10 1.395(3) . ?
C10 C11 1.392(4) . ?
C11 C12 1.386(4) . ?
C11 C14 1.516(3) . ?
C12 C13 1.395(3) . ?
C15 C16 1.399(3) . ?
C15 C20 1.402(3) . ?
C16 C17 1.385(4) . ?
C17 C18 1.387(4) . ?
C18 C19 1.384(4) . ?
C19 C20 1.385(4) . ?
C21 C22 1.518(3) . ?
C22 C23 1.524(4) . ?
C23 C24 1.523(4) . ?
C25 C26 1.515(3) . ?
C26 C27 1.530(3) . ?
C27 C28 1.524(4) . ?
 
loop_
 _geom_angle_atom_site_label_1
 _geom_angle_atom_site_label_2
 _geom_angle_atom_site_label_3
 _geom_angle
 _geom_angle_site_symmetry_1
 _geom_angle_site_symmetry_3
 _geom_angle_publ_flag
N1 Fe1 N1 101.64(12) 2 . ?
N1 Fe1 N4 135.62(8) 2 . ?
N1 Fe1 N4 93.84(8) . . ?
N1 Fe1 N4 93.84(8) 2 2 ?
N1 Fe1 N4 135.62(8) . 2 ?
N4 Fe1 N4 103.57(12) . 2 ?
N2 N1 C1 109.70(18) . . ?
N2 N1 Fe1 126.23(15) . . ?
C1 N1 Fe1 123.98(15) . . ?
C7 N2 N1 120.05(19) . . ?
C7 N3 N4 119.77(19) . . ?
N3 N4 C15 110.64(18) . . ?
N3 N4 Fe1 126.36(15) . . ?
C15 N4 Fe1 122.77(15) . . ?
C25 N5 C25 111.5(3) . 2_655 ?
C25 N5 C21 106.43(13) . 2_655 ?
C25 N5 C21 111.01(13) 2_655 2_655 ?
C25 N5 C21 111.01(13) . . ?
C25 N5 C21 106.43(13) 2_655 . ?
C21 N5 C21 110.5(3) 2_655 . ?
C2 C1 C6 119.3(2) . . ?
C2 C1 N1 120.9(2) . . ?
C6 C1 N1 119.8(2) . . ?
C3 C2 C1 120.3(2) . . ?
C2 C3 C4 120.3(3) . . ?
C5 C4 C3 119.6(3) . . ?
C6 C5 C4 120.3(2) . . ?
C5 C6 C1 120.2(2) . . ?
N3 C7 N2 131.3(2) . . ?
N3 C7 C8 114.7(2) . . ?
N2 C7 C8 113.8(2) . . ?
C9 C8 C13 117.6(2) . . ?
C9 C8 C7 121.5(2) . . ?
C13 C8 C7 120.9(2) . . ?
C8 C9 C10 121.0(2) . . ?
C11 C10 C9 121.3(2) . . ?
C12 C11 C10 117.6(2) . . ?
C12 C11 C14 120.6(2) . . ?
C10 C11 C14 121.8(2) . . ?
C11 C12 C13 121.5(2) . . ?
C8 C13 C12 120.9(2) . . ?
C16 C15 C20 118.3(2) . . ?
C16 C15 N4 122.2(2) . . ?
C20 C15 N4 119.5(2) . . ?
C17 C16 C15 120.7(2) . . ?
C16 C17 C18 120.7(2) . . ?
C19 C18 C17 119.1(2) . . ?
C18 C19 C20 120.9(2) . . ?
C19 C20 C15 120.4(2) . . ?
C22 C21 N5 116.09(18) . . ?
C21 C22 C23 110.2(2) . . ?
C24 C23 C22 112.6(2) . . ?
C26 C25 N5 114.81(18) . . ?
C25 C26 C27 109.9(2) . . ?
C28 C27 C26 112.4(2) . . ?
 
_refine_diff_density_max    0.380
_refine_diff_density_min   -0.356
_refine_diff_density_rms    0.074

_shelxl_version_number 2014-3

_shelx_res_file
;
TITL mo_molan356_0m in P2/n
CELL 0.71073  12.12440  14.11870  18.19210  90.0000  93.0825  90.0000
ZERR    4.00   0.00070   0.00080   0.00100   0.0000   0.0020   0.0000
LATT 1
SYMM 0.5-X, Y, 0.5-Z
SFAC C  H  N  Fe
UNIT 112 140 18 2
LIST 4 ! automatically inserted. Change 6 to 4 for CHECKCIF!!
L.S. 5 0   48
BOND
OMIT 0 0 4
OMIT 1 0 3
OMIT -1 0 3
OMIT 0 2 1
OMIT 1 2 0
acta
shel 10 0.78
FMAP 2
PLAN 5
SIZE 0.190 0.330 0.410
TEMP -173.180
ABIN
WGHT    0.052300    5.461700
FVAR       0.08956
FE1   4    0.250000    0.283353    0.250000    10.50000    0.00933    0.01372 =
         0.00951    0.00000   -0.00240    0.00000
N1    3    0.267022    0.200292    0.328891    11.00000    0.01155    0.01441 =
         0.01083    0.00065   -0.00239    0.00036
N2    3    0.324020    0.216923    0.392978    11.00000    0.01257    0.01848 =
         0.01057    0.00031   -0.00032    0.00334
N3    3    0.423342    0.354786    0.349885    11.00000    0.01158    0.01610 =
         0.01128   -0.00048   -0.00215    0.00191
N4    3    0.361286    0.365522    0.286793    11.00000    0.00971    0.01469 =
         0.01135   -0.00078   -0.00076   -0.00085
N5    3    0.750000    0.294922    0.250000    10.50000    0.01034    0.02226 =
         0.01202    0.00000    0.00095    0.00000
C1    1    0.214575    0.109592    0.331423    11.00000    0.01604    0.01911 =
         0.01121   -0.00016   -0.00017   -0.00192
C2    1    0.268283    0.032658    0.365390    11.00000    0.01815    0.02062 =
         0.02196    0.00038   -0.00119   -0.00082
AFIX  43
H2    2    0.339992    0.040529    0.388263    11.00000   -1.20000
AFIX   0
C3    1    0.217732   -0.054939    0.365944    11.00000    0.03373    0.01993 =
         0.02790    0.00296   -0.00280    0.00062
AFIX  43
H3    2    0.255028   -0.107155    0.388929    11.00000   -1.20000
AFIX   0
C4    1    0.112443   -0.067140    0.333012    11.00000    0.03911    0.02386 =
         0.02599    0.00257   -0.00466   -0.01657
AFIX  43
H4    2    0.077912   -0.127527    0.333334    11.00000   -1.20000
AFIX   0
C5    1    0.058190    0.009378    0.299710    11.00000    0.02341    0.03917 =
         0.02287    0.00556   -0.00830   -0.01500
AFIX  43
H5    2   -0.013935    0.001424    0.277506    11.00000   -1.20000
AFIX   0
C6    1    0.108678    0.097303    0.298681    11.00000    0.01829    0.02720 =
         0.01596    0.00414   -0.00271   -0.00294
AFIX  43
H6    2    0.071202    0.149398    0.275650    11.00000   -1.20000
AFIX   0
C7    1    0.396420    0.288672    0.398456    11.00000    0.01011    0.01564 =
         0.01316   -0.00301    0.00195    0.00109
C8    1    0.462778    0.291366    0.469899    11.00000    0.01243    0.01952 =
         0.01288   -0.00208   -0.00007    0.00420
C9    1    0.457869    0.218164    0.521048    11.00000    0.02093    0.02222 =
         0.01877    0.00020   -0.00548   -0.00091
AFIX  43
H9    2    0.407611    0.167367    0.511892    11.00000   -1.20000
AFIX   0
C10   1    0.525668    0.218408    0.585475    11.00000    0.02774    0.02532 =
         0.01612    0.00519   -0.00592    0.00344
AFIX  43
H10   2    0.520589    0.167796    0.619537    11.00000   -1.20000
AFIX   0
C11   1    0.600619    0.291367    0.600830    11.00000    0.01921    0.02958 =
         0.01416   -0.00428   -0.00506    0.00583
C12   1    0.601787    0.366163    0.551511    11.00000    0.01729    0.02591 =
         0.01780   -0.00545   -0.00281   -0.00316
AFIX  43
H12   2    0.650078    0.418063    0.561709    11.00000   -1.20000
AFIX   0
C13   1    0.533629    0.366920    0.487237    11.00000    0.01516    0.02210 =
         0.01308   -0.00019   -0.00112   -0.00063
AFIX  43
H13   2    0.535491    0.419598    0.454839    11.00000   -1.20000
AFIX   0
C14   1    0.680580    0.288856    0.667773    11.00000    0.02960    0.03367 =
         0.01972   -0.00352   -0.01287    0.00568
AFIX 137
H14A  2    0.754440    0.272221    0.652555    11.00000   -1.50000
H14B  2    0.656036    0.241443    0.702687    11.00000   -1.50000
H14C  2    0.682964    0.351279    0.691361    11.00000   -1.50000
AFIX   0
C15   1    0.398110    0.444959    0.246315    11.00000    0.00901    0.01668 =
         0.01632    0.00002    0.00237    0.00431
C16   1    0.468034    0.514087    0.278283    11.00000    0.01955    0.01892 =
         0.01851    0.00006   -0.00159    0.00061
AFIX  43
H16   2    0.491322    0.509310    0.328847    11.00000   -1.20000
AFIX   0
C17   1    0.503659    0.589427    0.236961    11.00000    0.02426    0.02020 =
         0.02867   -0.00023   -0.00090   -0.00421
AFIX  43
H17   2    0.552027    0.635284    0.259291    11.00000   -1.20000
AFIX   0
C18   1    0.469456    0.598638    0.163298    11.00000    0.02340    0.02425 =
         0.02929    0.00880    0.00719   -0.00208
AFIX  43
H18   2    0.493771    0.650576    0.135180    11.00000   -1.20000
AFIX   0
C19   1    0.399384    0.531058    0.131353    11.00000    0.01915    0.03264 =
         0.01675    0.00695    0.00283    0.00100
AFIX  43
H19   2    0.374568    0.537446    0.081173    11.00000   -1.20000
AFIX   0
C20   1    0.364978    0.454234    0.171606    11.00000    0.01317    0.02549 =
         0.01541    0.00051   -0.00036   -0.00042
AFIX  43
H20   2    0.318638    0.407531    0.148448    11.00000   -1.20000
AFIX   0
C21   1    0.661374    0.233365    0.282337    11.00000    0.00954    0.02268 =
         0.01733   -0.00137    0.00281   -0.00407
AFIX  23
H21A  2    0.599238    0.274770    0.294905    11.00000   -1.20000
H21B  2    0.632998    0.188865    0.243742    11.00000   -1.20000
AFIX   0
C22   1    0.697192    0.176296    0.350226    11.00000    0.01368    0.03442 =
         0.02166    0.00548   -0.00143   -0.00323
AFIX  23
H22A  2    0.712322    0.219577    0.392383    11.00000   -1.20000
H22B  2    0.766086    0.141533    0.341230    11.00000   -1.20000
AFIX   0
C23   1    0.607095    0.106228    0.368631    11.00000    0.01625    0.02333 =
         0.02239    0.00124    0.00131   -0.00168
AFIX  23
H23A  2    0.536558    0.140783    0.372320    11.00000   -1.20000
H23B  2    0.597142    0.059716    0.328093    11.00000   -1.20000
AFIX   0
C24   1    0.633796    0.053541    0.440475    11.00000    0.02585    0.03521 =
         0.03344    0.01144    0.00410   -0.00207
AFIX 137
H24A  2    0.702043    0.017156    0.436460    11.00000   -1.50000
H24B  2    0.573050    0.010356    0.450312    11.00000   -1.50000
H24C  2    0.643472    0.099218    0.480869    11.00000   -1.50000

AFIX   0
C25   1    0.808530    0.355588    0.309313    11.00000    0.01163    0.02487 =
         0.01375   -0.00131   -0.00200   -0.00300
AFIX  23
H25A  2    0.840799    0.313307    0.348199    11.00000   -1.20000
H25B  2    0.870237    0.389408    0.287316    11.00000   -1.20000
AFIX   0
C26   1    0.735666    0.427745    0.344763    11.00000    0.01461    0.02449 =
         0.01623   -0.00230    0.00121   -0.00163
AFIX  23
H26A  2    0.665670    0.397411    0.357660    11.00000   -1.20000
H26B  2    0.717687    0.479737    0.309621    11.00000   -1.20000
AFIX   0
C27   1    0.795253    0.467837    0.414243    11.00000    0.01873    0.02895 =
         0.02195   -0.00476    0.00014   -0.00437
AFIX  23
H27A  2    0.797197    0.418990    0.453334    11.00000   -1.20000
H27B  2    0.872456    0.483106    0.403549    11.00000   -1.20000
AFIX   0
C28   1    0.739462    0.556612    0.442134    11.00000    0.03005    0.02263 =
         0.02925   -0.00453    0.00046   -0.00659
AFIX 137
H28A  2    0.661830    0.542803    0.450209    11.00000   -1.50000
H28B  2    0.743746    0.607257    0.405560    11.00000   -1.50000
H28C  2    0.776936    0.576859    0.488566    11.00000   -1.50000
AFIX   0
HKLF 4

REM  mo_molan356_0m in P2/n
REM R1 =  0.0625 for    5768 Fo > 4sig(Fo)  and  0.0770 for all    6851 data
REM    302 parameters refined using      0 restraints

END

WGHT      0.0523      5.4616

REM Highest difference peak  0.380,  deepest hole -0.356,  1-sigma level  0.074
Q1    1   0.3075  0.2779  0.2202  11.00000  0.05    0.38
Q2    1  -0.0442 -0.0627  0.4699  11.00000  0.05    0.38
Q3    1   0.7901  0.2625  0.2330  11.00000  0.05    0.35
Q4    1   0.3082  0.3283  0.2779  11.00000  0.05    0.35
Q5    1   0.0154 -0.0855  0.5151  11.00000  0.05    0.35
;
_shelx_res_checksum   63502

_shelx_hkl_file
;
   2   0   0   28.99    0.55
  -2   0   0   28.86    0.55
  -2   0   0   25.53    0.52
  -3   0   0   -0.06    0.12
   3   0   0    0.07    0.13
  -3   0   0   -0.23    0.09
  -4   0   0   30.75    0.59
  -4   0   0   30.27    0.59
   4   0   0   30.49    0.65
  -4   0   0   30.42    0.64
  -5   0   0    0.04    0.10
  -5   0   0   -0.04    0.10
   5   0   0   -0.11    0.14
  -5   0   0    0.11    0.14
  -6   0   0  129.88    2.32
  -6   0   0  126.97    2.32
  -6   0   0  124.68    2.40
   7   0   0    0.00    0.19
  -7   0   0   -0.09    0.17
  -7   0   0   -0.06    0.13
   8   0   0   14.45    0.58
  -8   0   0   15.30    0.50
  -8   0   0   15.06    0.39
  -8   0   0   15.45    0.39
  -9   0   0   -0.06    0.16
  -9   0   0   -0.29    0.18
   9   0   0   -0.10    0.29
  -9   0   0   -0.06    0.16
 -10   0   0    4.29    0.30
 -10   0   0    4.13    0.41
 -10   0   0    4.28    0.31
  10   0   0    3.68    0.43
  11   0   0    0.40    0.30
 -11   0   0   -0.08    0.21
 -11   0   0   -0.10    0.19
 -11   0   0    0.43    0.48
 -12   0   0    0.34    0.35
 -12   0   0   -0.11    0.29
 -12   0   0    0.03    0.23
 -13   0   0   -0.63    0.40
 -13   0   0   -0.74    0.40
 -13   0   0   -0.03    0.25
 -14   0   0   23.57    0.70
 -14   0   0   24.36    0.86
 -14   0   0   21.53    0.68
 -15   0   0    1.03    0.34
 -15   0   0    0.37    0.35
   2  -1   0   22.46    0.45
  -2  -1   0   21.71    0.44
  -2  -1   0   21.87    0.42
  -2  -1   0   21.04    0.43
   2  -1   0   22.04    0.42
   2  -1   0   21.00    0.43
  -2   1   0   22.09    0.46
  -2   1   0   22.06    0.42
  -2   1   0   22.33    0.42
   2   1   0   21.84    0.44
   3  -1   0   24.89    0.54
  -3  -1   0   24.78    0.52
  -3  -1   0   23.90    0.48
  -3  -1   0   24.79    0.48
  -3   1   0   24.99    0.49
  -3   1   0   24.70    0.55
  -3   1   0   24.81    0.49
  -4  -1   0    0.75    0.11
  -4  -1   0    1.02    0.16
  -4  -1   0    0.82    0.12
   4  -1   0    1.09    0.18
  -4   1   0    1.04    0.12
  -4   1   0    1.14    0.13
  -4   1   0    1.04    0.14
   4   1   0    1.00    0.13
  -5  -1   0   35.79    0.71
  -5  -1   0   36.75    0.71
   5  -1   0   37.32    0.79
  -5  -1   0   36.93    0.78
  -5   1   0   36.81    0.79
  -5   1   0   37.41    0.72
  -5   1   0   37.06    0.72
   5   1   0   36.93    0.78
  -6  -1   0    8.53    0.26
  -6  -1   0    8.34    0.34
   6  -1   0    8.60    0.37
  -6   1   0    7.62    0.28
  -6   1   0    8.51    0.37
   6   1   0    8.76    0.37
  -6   1   0    8.19    0.27
   7  -1   0   23.65    0.63
  -7  -1   0   23.68    0.51
  -7  -1   0   23.34    0.60
  -7   1   0   23.27    0.62
  -7   1   0   24.20    0.53
  -7   1   0   24.07    0.52
   7   1   0   24.10    0.63
  -8  -1   0    4.37    0.32
  -8  -1   0    4.58    0.24
   8  -1   0    4.34    0.41
  -8  -1   0    4.76    0.23
  -8   1   0    4.86    0.26
   8   1   0    4.01    0.35
  -8   1   0    4.61    0.25
  -8   1   0    4.89    0.35
  -9  -1   0   13.42    0.39
  -9  -1   0   13.61    0.50
   9  -1   0   13.66    0.54
  -9  -1   0   13.10    0.39
  -9   1   0   13.34    0.39
  -9   1   0   13.80    0.53
  -9   1   0   13.18    0.40
   9   1   0   12.23    0.65
 -10  -1   0    0.44    0.23
 -10  -1   0    0.37    0.19
  10  -1   0   -0.04    0.26
 -10  -1   0    0.10    0.19
 -10   1   0    0.23    0.19
  10   1   0    0.04    0.26
 -10   1   0    0.38    0.21
 -10   1   0    0.00    0.25
 -11  -1   0    5.58    0.35
 -11  -1   0    5.36    0.49
 -11  -1   0    5.27    0.33
 -11   1   0    5.00    0.49
 -11   1   0    5.39    0.35
 -11   1   0    5.34    0.35
  11   1   0    4.74    0.48
 -12  -1   0    0.65    0.27
 -12  -1   0    0.95    0.24
 -12  -1   0    0.88    0.28
 -12   1   0    0.92    0.32
 -12   1   0    1.26    0.25
  12   1   0    0.89    0.38
 -13  -1   0    0.83    0.26
 -13  -1   0    0.81    0.34
 -13   1   0    0.57    0.26
 -13   1   0    0.90    0.26
 -13   1   0    0.79    0.38
 -14  -1   0    1.95    0.32
 -14  -1   0    2.12    0.41
 -14  -1   0    1.65    0.32
 -14  -1   0    1.45    0.48
 -14   1   0    1.91    0.34
 -14   1   0    2.87    0.37
 -14   1   0    1.83    0.34
 -14   1   0    1.30    0.31
 -15  -1   0    2.06    0.38
 -15  -1   0    3.26    0.49
 -15  -1   0    2.36    0.48
 -15   1   0    1.96    0.46
 -15   1   0    1.24    0.38
 -15   1   0    2.58    0.46
   0  -2   0   57.25    1.11
   0   2   0   62.97    1.14
   1  -2   0   17.03    0.34
  -1  -2   0   17.03    0.35
   1  -2   0   16.86    0.35
  -1  -2   0   16.97    0.34
  -1  -2   0   16.50    0.33
  -1   2   0   17.20    0.34
   1   2   0   18.03    0.34
   1   2   0   17.16    0.34
  -1   2   0   16.94    0.33
  -1   2   0   16.99    0.35
   1   2   0   16.68    0.35
  -2  -2   0    0.07    0.07
  -2  -2   0    0.16    0.09
  -2  -2   0    0.00    0.07
   2  -2   0    0.25    0.09
   2  -2   0    0.32    0.08
   2  -2   0    0.13    0.06
  -2   2   0    0.19    0.09
   2   2   0    0.16    0.08
  -2   2   0    0.21    0.08
   2   2   0    0.18    0.08
  -2   2   0    0.14    0.10
   2   2   0    0.03    0.07
  -2   2   0    0.13    0.06
  -3  -2   0   40.19    0.76
  -3  -2   0   40.26    0.75
  -3  -2   0   39.94    0.78
   3  -2   0   40.02    0.76
   3  -2   0   39.48    0.76
   3   2   0   39.88    0.75
  -3   2   0   39.31    0.76
  -3   2   0   40.01    0.81
   3   2   0   40.01    0.78
   3   2   0   39.66    0.74
  -3   2   0   40.01    0.75
  -3   2   0   39.75    0.77
   4  -2   0    5.81    0.18
  -4  -2   0    6.11    0.21
  -4  -2   0    5.60    0.19
  -4  -2   0    5.46    0.18
   4   2   0    6.03    0.23
  -4   2   0    5.66    0.18
  -4   2   0    5.67    0.20
  -4   2   0    5.84    0.27
  -4   2   0    5.85    0.19
  -5  -2   0    7.70    0.28
  -5  -2   0    7.43    0.23
   5  -2   0    7.54    0.33
  -5  -2   0    7.33    0.24
  -5   2   0    7.22    0.33
  -5   2   0    7.74    0.26
   5   2   0    7.78    0.31
  -5   2   0    7.70    0.24
   6  -2   0    0.81    0.20
  -6  -2   0    0.62    0.12
  -6  -2   0    0.69    0.16
  -6  -2   0    0.68    0.14
  -6   2   0    0.57    0.13
   6   2   0    0.70    0.19
  -6   2   0    0.58    0.20
  -6   2   0    0.76    0.15
   7  -2   0    5.53    0.36
  -7  -2   0    5.56    0.31
  -7  -2   0    5.43    0.23
  -7  -2   0    5.67    0.24
  -7   2   0    5.90    0.36
   7   2   0    5.26    0.34
  -7   2   0    5.63    0.25
  -7   2   0    5.89    0.27
  -8  -2   0    4.95    0.25
  -8  -2   0    5.44    0.33
   8   2   0    5.00    0.36
  -8   2   0    5.33    0.25
  -8   2   0    5.21    0.28
  -8   2   0    5.08    0.37
  -9  -2   0    1.47    0.18
  -9  -2   0    1.43    0.23
   9   2   0    1.61    0.26
  -9   2   0    1.65    0.24
  -9   2   0    1.89    0.21
  -9   2   0    1.63    0.28
 -10  -2   0    7.43    0.33
 -10  -2   0    8.04    0.44
 -10  -2   0    7.35    0.34
  10   2   0    6.66    0.47
 -10   2   0    7.86    0.35
 -10   2   0    7.05    0.36
 -10   2   0    7.09    0.48
 -11  -2   0    2.36    0.33
 -11  -2   0    2.83    0.35
 -11  -2   0    2.38    0.30
 -11   2   0    2.61    0.31
 -11   2   0    2.37    0.33
  11   2   0    2.77    0.34
 -11   2   0    2.27    0.34
 -12  -2   0    7.37    0.62
 -12  -2   0    8.16    0.40
 -12  -2   0    7.55    0.52
 -12   2   0    7.62    0.44
 -12   2   0    7.74    0.55
 -12   2   0    7.57    0.43
  12   2   0    7.67    0.55
 -12   2   0    7.71    0.40
 -13  -2   0    1.45    0.35
 -13  -2   0    1.33    0.46
 -13  -2   0    1.63    0.26
 -13   2   0    0.90    0.27
 -13   2   0    0.84    0.41
 -13   2   0    1.33    0.30
 -13   2   0    1.37    0.29
 -14  -2   0   10.61    0.50
 -14  -2   0    8.06    0.77
 -14  -2   0   11.24    0.64
 -14  -2   0   10.26    0.52
 -14   2   0   10.80    0.76
 -14   2   0   10.82    0.58
 -14   2   0   10.93    0.54
 -14   2   0    9.89    0.51
 -15  -2   0    1.36    0.35
 -15  -2   0    0.30    0.41
 -15   2   0    1.98    0.40
 -15   2   0    1.35    0.35
 -15   2   0    1.96    0.39
   0  -3   0    1.12    0.12
   0  -3   0    0.88    0.14
   0  -3   0    0.88    0.12
   0   3   0    0.80    0.12
   0   3   0    0.96    0.15
   0   3   0    0.91    0.12
   1  -3   0   13.94    0.33
  -1  -3   0   13.86    0.31
   1  -3   0   14.41    0.30
   1  -3   0   14.42    0.32
  -1  -3   0   13.92    0.33
   1   3   0   13.83    0.31
   1   3   0   14.31    0.29
   1   3   0   13.89    0.33
  -1   3   0   13.87    0.31
  -1   3   0   14.27    0.30
  -1   3   0   13.99    0.33
   2  -3   0    1.74    0.11
   2  -3   0    1.60    0.16
  -2  -3   0    1.58    0.14
  -2  -3   0    1.65    0.17
   2  -3   0    1.58    0.18
  -2  -3   0    1.45    0.12
   2   3   0    1.78    0.16
  -2   3   0    1.50    0.15
  -2   3   0    1.84    0.11
   2   3   0    1.63    0.13
  -2   3   0    1.69    0.18
   2   3   0    1.50    0.13
  -3  -3   0    0.12    0.08
   3  -3   0    0.18    0.09
   3  -3   0    0.14    0.07
  -3  -3   0    0.11    0.08
  -3  -3   0    0.10    0.10
   3  -3   0    0.08    0.10
  -3   3   0    0.15    0.09
   3   3   0    0.23    0.09
  -3   3   0    0.16    0.06
  -3   3   0    0.09    0.11
  -3   3   0    0.12    0.11
   3   3   0    0.14    0.09
   3   3   0    0.07    0.08
  -4  -3   0   -0.04    0.09
  -4  -3   0   -0.02    0.09
   4  -3   0    0.13    0.11
  -4  -3   0   -0.06    0.11
   4  -3   0    0.00    0.11
  -4   3   0   -0.03    0.12
  -4   3   0    0.04    0.15
   4   3   0    0.02    0.09
  -4   3   0    0.04    0.11
   4   3   0    0.03    0.09
   4   3   0    0.13    0.12
  -4   3   0   -0.07    0.08
  -5  -3   0   13.71    0.35
   5  -3   0   14.15    0.34
  -5  -3   0   13.13    0.33
  -5  -3   0   14.02    0.37
   5  -3   0   13.83    0.34
  -5   3   0   13.41    0.33
  -5   3   0   14.11    0.35
  -5   3   0   13.63    0.45
  -5   3   0   13.71    0.37
   5   3   0   13.84    0.39
  -6  -3   0    3.04    0.20
  -6  -3   0    3.41    0.24
  -6  -3   0    2.94    0.22
  -6   3   0    3.79    0.22
  -6   3   0    3.73    0.32
  -6   3   0    3.80    0.24
   6   3   0    3.45    0.28
  -6   3   0    3.36    0.20
  -7  -3   0    0.99    0.16
  -7  -3   0    0.93    0.14
  -7  -3   0    0.86    0.17
   7   3   0    0.94    0.21
  -7   3   0    1.20    0.15
  -7   3   0    1.23    0.16
  -7   3   0    0.69    0.21
  -7   3   0    1.01    0.17
  -8  -3   0    3.07    0.29
  -8  -3   0    2.97    0.25
  -8  -3   0    2.78    0.23
  -8   3   0    2.66    0.25
  -8   3   0    2.73    0.24
  -8   3   0    2.66    0.27
  -8   3   0    2.94    0.36
   8   3   0    2.75    0.34
  -9  -3   0    5.42    0.29
  -9  -3   0    5.57    0.36
  -9   3   0    5.77    0.31
   9   3   0    5.20    0.40
  -9   3   0    5.60    0.33
  -9   3   0    5.15    0.44
  -9   3   0    5.48    0.31
 -10  -3   0    2.58    0.35
 -10  -3   0    2.26    0.28
 -10   3   0    2.68    0.30
 -10   3   0    2.82    0.26
  10   3   0    2.84    0.32
 -10   3   0    2.75    0.35
 -10   3   0    2.39    0.31
 -11  -3   0    2.37    0.41
 -11  -3   0    2.49    0.24
 -11  -3   0    2.22    0.30
 -11   3   0    2.65    0.38
 -11   3   0    2.61    0.29
  11   3   0    1.67    0.33
 -11   3   0    2.62    0.28
 -12  -3   0    2.34    0.34
 -12  -3   0    2.34    0.40
 -12  -3   0    1.88    0.26
 -12   3   0    1.91    0.33
 -12   3   0    2.53    0.28
 -12   3   0    2.51    0.42
 -12   3   0    2.51    0.39
  12   3   0    1.79    0.36
 -13  -3   0    3.03    0.38
 -13  -3   0    3.50    0.40
 -13  -3   0    3.04    0.42
 -13  -3   0    3.40    0.42
 -13   3   0    3.15    0.41
 -13   3   0    3.56    0.58
 -13   3   0    2.58    0.35
 -13   3   0    3.06    0.31
 -14  -3   0    0.99    0.31
 -14  -3   0    0.33    0.44
 -14  -3   0    0.79    0.31
 -14  -3   0    0.28    0.35
 -14   3   0    0.99    0.30
  14   3   0    0.16    0.44
 -14   3   0    0.34    0.46
 -14   3   0    0.87    0.32
 -14   3   0    0.84    0.40
 -15  -3   0    5.42    0.62
 -15  -3   0    5.77    0.51
 -15  -3   0    3.91    0.66
 -15   3   0    6.53    0.58
 -15   3   0    3.81    0.56
 -15   3   0    5.10    0.82
   0  -4   0   21.58    0.45
   0  -4   0   21.19    0.47
   0  -4   0   21.50    0.45
   0   4   0   21.29    0.47
   0   4   0   22.02    0.46
   1  -4   0    2.29    0.16
   1  -4   0    2.79    0.14
  -1  -4   0    2.57    0.16
   1  -4   0    2.34    0.19
  -1  -4   0    2.63    0.18
  -1  -4   0    2.52    0.19
  -1   4   0    2.32    0.16
  -1   4   0    2.21    0.19
   1   4   0    2.45    0.15
  -1   4   0    2.77    0.14
   1   4   0    2.71    0.19
   2  -4   0   12.63    0.33
   2  -4   0   12.51    0.30
   2  -4   0   13.07    0.28
  -2  -4   0   12.24    0.32
  -2  -4   0   12.40    0.30
   2   4   0   12.92    0.29
  -2   4   0   12.72    0.30
  -2   4   0   12.55    0.33
   2   4   0   12.05    0.31
  -2   4   0   12.99    0.28
   2   4   0   12.41    0.29
   3  -4   0    1.17    0.12
   3  -4   0    1.45    0.16
  -3  -4   0    1.03    0.14
  -3  -4   0    1.09    0.13
  -3  -4   0    1.25    0.17
   3  -4   0    1.37    0.19
   3   4   0    1.20    0.17
  -3   4   0    1.25    0.15
  -3   4   0    1.26    0.19
   3   4   0    0.98    0.14
   3   4   0    1.21    0.15
  -3   4   0    1.34    0.12
   4  -4   0    9.55    0.31
  -4  -4   0    9.56    0.28
   4  -4   0   10.36    0.30
  -4  -4   0    9.92    0.28
  -4  -4   0    9.83    0.31
   4   4   0    9.61    0.27
   4   4   0    9.98    0.30
  -4   4   0   10.18    0.37
  -4   4   0   10.28    0.25
   4   4   0    9.37    0.29
  -4   4   0    9.59    0.29
  -4   4   0    9.58    0.33
  -5  -4   0   57.70    1.12
   5  -4   0   59.14    1.13
  -5  -4   0   58.11    1.13
  -5  -4   0   57.87    1.14
   5  -4   0   58.78    1.12
  -5   4   0   58.44    1.13
  -5   4   0   59.31    1.15
   5   4   0   58.66    1.16
  -5   4   0   58.81    1.22
  -5   4   0   59.30    1.10
   6  -4   0    2.68    0.21
   6  -4   0    2.80    0.22
  -6  -4   0    2.48    0.20
  -6  -4   0    2.35    0.22
  -6  -4   0    2.22    0.23
   6   4   0    2.40    0.26
  -6   4   0    2.56    0.32
  -6   4   0    2.83    0.22
  -6   4   0    2.28    0.18
  -6   4   0    2.78    0.25
  -7  -4   0    3.04    0.22
  -7  -4   0    3.40    0.25
  -7  -4   0    2.84    0.24
   7   4   0    3.18    0.30
  -7   4   0    3.04    0.34
  -7   4   0    2.96    0.21
  -7   4   0    3.28    0.27
  -7   4   0    3.24    0.24
  -8  -4   0    0.62    0.16
  -8  -4   0    0.73    0.18
  -8  -4   0    0.62    0.18
  -8   4   0    0.45    0.24
  -8   4   0    0.52    0.15
  -8   4   0    0.70    0.17
  -8   4   0    0.69    0.20
   8   4   0    0.80    0.25
  -9  -4   0    3.11    0.32
  -9  -4   0    2.55    0.30
  -9  -4   0    2.71    0.27
  -9   4   0    3.47    0.30
  -9   4   0    3.20    0.32
  -9   4   0    2.73    0.27
   9   4   0    3.60    0.41
  -9   4   0    2.94    0.43
 -10  -4   0    7.60    0.42
 -10  -4   0    7.40    0.38
 -10  -4   0    7.46    0.34
 -10   4   0    7.18    0.60
  10   4   0    6.67    0.48
 -10   4   0    7.61    0.35
 -10   4   0    7.36    0.57
 -10   4   0    7.38    0.40
 -11  -4   0    1.94    0.28
 -11  -4   0    1.62    0.23
 -11   4   0    1.85    0.28
 -11   4   0    1.42    0.35
  11   4   0    1.22    0.35
 -11   4   0    1.58    0.40
 -12  -4   0    2.94    0.31
 -12  -4   0    2.67    0.42
 -12  -4   0    3.12    0.37
 -12   4   0    2.69    0.38
 -12   4   0    3.13    0.41
 -12   4   0    3.31    0.33
 -12   4   0    3.02    0.42
  12   4   0    2.88    0.40
 -13  -4   0    0.12    0.29
 -13  -4   0   -0.01    0.32
 -13  -4   0   -0.60    0.28
 -13  -4   0   -0.12    0.25
 -13   4   0   -0.08    0.32
 -13   4   0   -0.43    0.28
 -13   4   0    0.15    0.39
 -13   4   0    0.30    0.27
 -14  -4   0    5.18    0.52
 -14  -4   0    6.20    0.55
 -14  -4   0    5.70    0.57
 -14  -4   0    4.37    0.71
 -14   4   0    5.15    0.54
 -14   4   0    3.72    0.48
 -14   4   0    6.19    0.71
 -14   4   0    5.59    0.47
  14   4   0    4.37    0.54
 -15  -4   0    0.33    0.61
 -15  -4   0    1.04    0.35
 -15   4   0    2.22    0.40
 -15   4   0    0.32    0.40
 -15   4   0   -0.13    0.54
   0  -5   0    1.70    0.19
   0  -5   0    1.75    0.15
   0  -5   0    1.51    0.15
   0   5   0    1.51    0.14
   0   5   0    1.55    0.18
   0   5   0    1.63    0.16
   1  -5   0    3.08    0.17
  -1  -5   0    3.27    0.21
  -1  -5   0    3.27    0.17
  -1  -5   0    3.30    0.19
   1  -5   0    3.48    0.16
   1  -5   0    3.15    0.21
  -1   5   0    3.37    0.18
   1   5   0    3.36    0.21
  -1   5   0    3.10    0.21
   1   5   0    3.04    0.17
  -1   5   0    3.27    0.16
  -2  -5   0    4.73    0.20
   2  -5   0    5.00    0.18
   2  -5   0    4.88    0.21
  -2  -5   0    4.58    0.24
   2  -5   0    4.56    0.24
   2   5   0    4.90    0.18
   2   5   0    4.68    0.20
  -2   5   0    4.91    0.21
  -2   5   0    4.83    0.24
  -2   5   0    5.04    0.18
   2   5   0    4.87    0.24
  -3  -5   0   12.43    0.31
  -3  -5   0   12.39    0.33
  -3  -5   0   12.35    0.36
   3  -5   0   12.63    0.37
   3  -5   0   12.60    0.30
   3  -5   0   12.98    0.35
  -3   5   0   13.17    0.30
   3   5   0   12.31    0.36
   3   5   0   12.51    0.33
  -3   5   0   12.51    0.34
  -3   5   0   12.71    0.38
   3   5   0   12.65    0.32
   4  -5   0    2.73    0.25
   4  -5   0    3.11    0.18
  -4  -5   0    2.97    0.20
  -4  -5   0    3.07    0.19
   4  -5   0    3.33    0.23
  -4  -5   0    3.15    0.24
   4   5   0    3.16    0.22
  -4   5   0    3.11    0.22
  -4   5   0    3.39    0.17
  -4   5   0    3.02    0.27
   4   5   0    3.19    0.24
   4   5   0    2.88    0.20
  -4   5   0    2.97    0.30
  -5  -5   0   10.11    0.34
   5  -5   0   10.42    0.34
  -5  -5   0   10.35    0.30
  -5  -5   0    9.64    0.30
   5  -5   0   10.53    0.32
  -5   5   0   10.56    0.36
  -5   5   0   10.40    0.27
   5   5   0   10.24    0.34
  -5   5   0   10.20    0.32
  -5   5   0    9.93    0.41
   5   5   0   10.28    0.31
   5   5   0   10.21    0.29
  -6  -5   0   31.03    0.65
   6  -5   0   31.45    0.66
   6  -5   0   30.79    0.67
  -6  -5   0   30.93    0.68
  -6  -5   0   31.01    0.67
   6   5   0   30.75    0.70
  -6   5   0   31.17    0.67
  -6   5   0   31.28    0.70
  -6   5   0   31.33    0.63
  -6   5   0   30.48    0.77
  -7  -5   0    0.90    0.16
   7  -5   0    0.95    0.17
  -7  -5   0    0.88    0.18
   7  -5   0    0.88    0.17
  -7  -5   0    0.88    0.16
   7   5   0    0.96    0.21
  -7   5   0    0.90    0.14
  -7   5   0    1.02    0.19
  -7   5   0    0.83    0.18
  -8  -5   0    8.23    0.36
  -8  -5   0    7.75    0.32
  -8  -5   0    7.70    0.34
  -8   5   0    8.59    0.38
  -8   5   0    8.20    0.47
   8   5   0    8.15    0.42
  -8   5   0    7.87    0.29
  -8   5   0    8.17    0.35
  -9  -5   0    2.35    0.32
  -9  -5   0    1.84    0.27
  -9  -5   0    2.12    0.30
  -9   5   0    2.41    0.27
  -9   5   0    2.64    0.33
   9   5   0    2.71    0.32
  -9   5   0    2.08    0.26
  -9   5   0    2.42    0.35
 -10  -5   0   -0.21    0.23
 -10  -5   0   -0.13    0.21
 -10  -5   0   -0.19    0.22
 -10   5   0   -0.30    0.23
 -10   5   0   -0.18    0.24
  10   5   0   -0.15    0.30
 -10   5   0    0.09    0.20
 -10   5   0    0.05    0.32
 -11  -5   0    0.38    0.26
 -11  -5   0    0.24    0.23
 -11  -5   0    0.03    0.26
 -11   5   0   -0.05    0.22
 -11   5   0    0.28    0.28
  11   5   0    0.19    0.34
 -11   5   0    0.06    0.35
 -11   5   0    0.01    0.21
 -12  -5   0   -0.06    0.29
 -12  -5   0   -0.33    0.31
 -12  -5   0    0.02    0.25
 -12   5   0    0.00    0.24
  12   5   0    0.58    0.30
 -12   5   0    0.16    0.31
 -12   5   0   -0.30    0.34
 -13  -5   0    3.30    0.58
 -13  -5   0    3.28    0.37
 -13  -5   0    3.25    0.47
 -13  -5   0    3.72    0.41
 -13   5   0    3.99    0.50
 -13   5   0    3.30    0.47
 -13   5   0    3.84    0.42
 -13   5   0    3.65    0.40
 -14  -5   0    5.03    0.73
 -14  -5   0    6.33    0.54
 -14  -5   0    5.33    0.55
 -14  -5   0    4.14    0.55
 -14   5   0    5.07    0.78
  14   5   0    5.10    0.73
 -14   5   0    5.49    0.47
 -14   5   0    4.92    0.55
 -14   5   0    4.47    0.52
   0  -6   0   62.02    1.21
   0  -6   0   63.87    1.24
   0  -6   0   63.55    1.21
   0   6   0   62.86    1.24
   0   6   0   65.02    1.22
   0   6   0   61.47    1.19
  -1  -6   0    0.14    0.14
  -1  -6   0    0.26    0.17
   1  -6   0    0.10    0.14
  -1  -6   0    0.24    0.14
   1  -6   0    0.40    0.12
   1  -6   0    0.27    0.17
   1   6   0    0.22    0.14
   1   6   0    0.09    0.08
  -1   6   0    0.18    0.14
  -1   6   0    0.22    0.16
   1   6   0    0.25    0.16
  -1   6   0    0.21    0.14
  -2  -6   0    3.68    0.27
  -2  -6   0    3.62    0.23
   2  -6   0    3.80    0.24
  -2  -6   0    3.79    0.28
   2  -6   0    3.57    0.28
   2  -6   0    4.15    0.19
  -2   6   0    3.66    0.29
   2   6   0    3.55    0.22
  -2   6   0    3.78    0.20
   2   6   0    3.64    0.27
   2   6   0    3.82    0.19
  -2   6   0    3.67    0.23
  -3  -6   0    0.88    0.19
   3  -6   0    0.99    0.17
   3  -6   0    0.86    0.20
   3  -6   0    1.11    0.13
  -3  -6   0    1.01    0.15
  -3   6   0    1.37    0.17
   3   6   0    0.90    0.18
   3   6   0    0.99    0.15
  -3   6   0    1.08    0.16
   3   6   0    1.07    0.14
  -3   6   0    0.81    0.19
   4  -6   0    0.53    0.16
   4  -6   0    0.39    0.12
  -4  -6   0    0.35    0.17
   4  -6   0    0.40    0.18
  -4  -6   0    0.20    0.13
  -4  -6   0    0.43    0.11
  -4   6   0    0.59    0.12
  -4   6   0    0.30    0.18
   4   6   0    0.20    0.13
  -4   6   0    0.48    0.18
   4   6   0    0.56    0.14
  -4   6   0    0.39    0.15
   4   6   0    0.45    0.17
   5  -6   0    7.74    0.31
   5  -6   0    7.74    0.33
  -5  -6   0    7.69    0.33
   5  -6   0    7.68    0.25
  -5  -6   0    7.66    0.29
  -5  -6   0    7.88    0.27
   5   6   0    7.53    0.27
  -5   6   0    7.70    0.24
   5   6   0    7.73    0.30
  -5   6   0    7.84    0.35
  -5   6   0    7.82    0.31
  -5   6   0    7.77    0.39
   5   6   0    7.59    0.30
  -6  -6   0    2.24    0.21
   6  -6   0    1.75    0.24
  -6  -6   0    1.96    0.22
  -6  -6   0    2.27    0.27
   6  -6   0    2.27    0.27
  -6   6   0    2.01    0.18
   6   6   0    2.40    0.37
   6   6   0    2.22    0.20
   6   6   0    2.04    0.23
  -6   6   0    1.96    0.25
  -6   6   0    2.11    0.29
  -6   6   0    2.20    0.34
  -7  -6   0    0.11    0.19
   7  -6   0   -0.10    0.18
  -7  -6   0   -0.11    0.16
   7  -6   0   -0.02    0.18
  -7  -6   0    0.07    0.15
  -7   6   0   -0.04    0.13
   7   6   0   -0.06    0.20
  -7   6   0    0.28    0.21
  -7   6   0    0.30    0.27
   8  -6   0   11.92    0.40
   8  -6   0   12.33    0.40
  -8  -6   0   12.46    0.44
  -8  -6   0   11.95    0.41
  -8  -6   0   11.98    0.40
  -8   6   0   12.20    0.47
  -8   6   0   12.20    0.36
  -8   6   0   12.63    0.57
   8   6   0   12.24    0.49
  -9  -6   0    9.11    0.43
  -9  -6   0    8.84    0.37
  -9  -6   0    8.91    0.39
  -9   6   0    8.50    0.32
  -9   6   0    9.09    0.45
   9   6   0    8.82    0.51
 -10  -6   0    1.03    0.26
 -10  -6   0    0.78    0.22
 -10  -6   0    0.73    0.30
 -10  -6   0    0.64    0.27
  10   6   0    0.66    0.30
 -10   6   0    0.77    0.19
 -10   6   0    0.65    0.24
 -10   6   0    0.57    0.32
 -10   6   0    1.14    0.29
 -11  -6   0    0.35    0.24
 -11  -6   0   -0.04    0.28
 -11  -6   0    0.28    0.25
 -11  -6   0   -0.02    0.35
 -11   6   0    0.57    0.21
  11   6   0    0.74    0.25
 -11   6   0    0.15    0.32
 -11   6   0   -0.21    0.24
 -11   6   0    0.31    0.30
 -12  -6   0    0.45    0.32
 -12  -6   0    0.77    0.25
 -12  -6   0    0.48    0.32
 -12   6   0    0.49    0.40
 -12   6   0    0.82    0.27
  12   6   0    0.37    0.34
 -12   6   0    0.48    0.26
 -12   6   0    0.71    0.57
 -13  -6   0    0.24    0.31
 -13  -6   0    0.90    0.39
 -13  -6   0    1.04    0.37
 -13   6   0    0.04    0.31
 -13   6   0    0.62    0.27
 -13   6   0    0.88    0.36
 -13   6   0    1.37    0.47
 -14  -6   0    1.43    0.40
 -14  -6   0    1.63    0.41
 -14   6   0    1.64    0.56
 -14   6   0    2.04    0.39
 -14   6   0    1.42    0.42
  14   6   0    1.09    0.55
   0  -7   0    4.76    0.25
   0  -7   0    4.45    0.32
   0  -7   0    4.42    0.26
   0   7   0    4.63    0.26
   0   7   0    4.41    0.31
   0   7   0    4.11    0.22
   1  -7   0    1.50    0.23
  -1  -7   0    1.54    0.21
   1  -7   0    1.43    0.21
   1  -7   0    1.91    0.20
  -1  -7   0    1.57    0.19
  -1  -7   0    1.54    0.18
  -1   7   0    1.48    0.21
   1   7   0    1.41    0.18
  -1   7   0    1.51    0.18
   1   7   0    1.56    0.21
  -2  -7   0    3.66    0.25
   2  -7   0    3.26    0.30
   2  -7   0    3.40    0.26
  -2  -7   0    3.81    0.28
   2  -7   0    3.59    0.21
  -2  -7   0    3.69    0.30
   2   7   0    3.72    0.24
   2   7   0    3.71    0.20
   2   7   0    3.65    0.30
  -2   7   0    3.69    0.26
  -2   7   0    3.73    0.22
  -2   7   0    3.29    0.30
  -3  -7   0    3.36    0.30
   3  -7   0    3.59    0.30
  -3  -7   0    3.85    0.24
  -3  -7   0    3.63    0.29
   3  -7   0    3.88    0.20
   3  -7   0    4.13    0.27
  -3   7   0    3.92    0.20
   3   7   0    4.10    0.21
  -3   7   0    3.70    0.31
   3   7   0    3.93    0.28
  -3   7   0    3.69    0.26
   3   7   0    3.51    0.24
  -4  -7   0   27.87    0.62
   4  -7   0   27.91    0.66
  -4  -7   0   28.40    0.66
   4  -7   0   27.99    0.58
   4  -7   0   27.94    0.63
   4   7   0   28.34    0.61
  -4   7   0   27.71    0.63
   4   7   0   27.67    0.61
  -4   7   0   27.68    0.58
  -4   7   0   28.24    0.67
   4   7   0   27.70    0.64
  -5  -7   0    0.40    0.13
   5  -7   0    0.49    0.14
  -5  -7   0    0.58    0.21
   5  -7   0    0.74    0.21
   5  -7   0    0.63    0.18
  -5  -7   0    0.62    0.16
   5   7   0    0.51    0.26
  -5   7   0    0.62    0.13
  -5   7   0    0.35    0.20
  -5   7   0    0.56    0.17
   5   7   0    0.38    0.20
  -5   7   0    0.58    0.21
   5   7   0    0.49    0.18
  -6  -7   0   18.30    0.48
  -6  -7   0   18.66    0.52
  -6  -7   0   18.14    0.46
   6  -7   0   18.36    0.49
  -6  -7   0   18.04    0.41
   6   7   0   17.88    0.51
  -6   7   0   18.50    0.54
   6   7   0   18.06    0.47
   6   7   0   17.42    0.44
  -6   7   0   18.49    0.42
  -6   7   0   18.82    0.61
   7  -7   0    0.62    0.21
  -7  -7   0    0.64    0.19
  -7  -7   0    0.40    0.16
  -7  -7   0    0.29    0.16
   7  -7   0    0.44    0.22
  -7  -7   0    0.38    0.22
  -7   7   0    0.22    0.20
   7   7   0    0.37    0.20
  -7   7   0    0.40    0.23
  -7   7   0    0.25    0.26
  -7   7   0    0.53    0.15
  -8  -7   0    5.83    0.34
  -8  -7   0    6.06    0.57
  -8  -7   0    5.98    0.34
  -8  -7   0    6.15    0.33
   8  -7   0    5.97    0.35
   8  -7   0    6.57    0.36
   8   7   0    5.73    0.41
  -8   7   0    6.38    0.43
  -8   7   0    5.72    0.44
  -8   7   0    5.29    0.48
  -8   7   0    6.50    0.27
   9  -7   0    2.76    0.30
  -9  -7   0    2.06    0.34
  -9  -7   0    2.68    0.32
   9  -7   0    3.10    0.32
  -9  -7   0    2.69    0.37
  -9  -7   0    2.64    0.31
  -9   7   0    2.71    0.36
   9   7   0    2.68    0.31
  -9   7   0    3.16    0.50
  -9   7   0    3.41    0.41
  -9   7   0    2.91    0.25
 -10  -7   0    5.26    0.42
 -10  -7   0    5.17    0.37
 -10  -7   0    4.33    0.44
 -10  -7   0    4.59    0.39
  10   7   0    4.96    0.48
 -10   7   0    5.36    0.30
 -10   7   0    5.38    0.48
 -10   7   0    5.37    0.57
 -10   7   0    4.70    0.40
 -11  -7   0    2.51    0.38
 -11  -7   0    2.33    0.33
 -11  -7   0    2.32    0.32
 -11  -7   0    1.88    0.27
 -11   7   0    2.00    0.29
 -11   7   0    2.75    0.30
  11   7   0    2.40    0.38
 -11   7   0    1.92    0.43
 -12  -7   0    4.27    0.54
 -12  -7   0    4.52    0.73
 -12  -7   0    4.87    0.46
 -12  -7   0    4.37    0.42
 -12   7   0    4.59    0.53
  12   7   0    3.98    0.60
 -12   7   0    4.68    0.44
 -12   7   0    4.76    0.44
 -12   7   0    4.04    0.66
 -13  -7   0    1.84    0.36
 -13  -7   0    2.08    0.32
 -13  -7   0    1.46    0.32
 -13   7   0    0.64    0.34
 -13   7   0    1.23    0.48
 -13   7   0    1.48    0.38
 -13   7   0    1.77    0.38
 -14  -7   0    1.76    0.82
 -14  -7   0    2.37    0.35
 -14  -7   0    2.42    0.43
 -14  -7   0    3.32    0.50
 -14   7   0    2.68    0.44
 -14   7   0    2.75    0.53
 -14   7   0    4.03    0.60
  14   7   0    1.46    0.54
   0  -8   0   -0.08    0.15
   0  -8   0    0.05    0.15
   0  -8   0    0.02    0.19
   0   8   0   -0.10    0.16
   0   8   0   -0.12    0.19
   0   8   0   -0.26    0.15
  -1  -8   0    0.40    0.20
   1  -8   0    0.65    0.15
  -1  -8   0    0.47    0.16
  -1  -8   0    0.77    0.17
   1  -8   0    0.54    0.21
   1  -8   0    0.55    0.16
  -1   8   0    0.53    0.17
   1   8   0    0.59    0.10
   1   8   0    0.46    0.20
   1   8   0    0.37    0.17
  -1   8   0    0.59    0.20
  -1   8   0    0.56    0.17
  -2  -8   0   46.15    0.97
  -2  -8   0   45.12    0.95
   2  -8   0   45.39    0.98
   2  -8   0   45.36    0.96
  -2  -8   0   45.76    0.98
   2  -8   0   46.60    0.92
   2   8   0   46.44    0.94
   2   8   0   45.92    0.97
   2   8   0   47.94    0.92
  -2   8   0   47.14    0.96
  -2   8   0   47.01    0.93
  -2   8   0   45.40    0.98
   3  -8   0    1.36    0.19
  -3  -8   0    1.42    0.22
   3  -8   0    1.90    0.26
  -3  -8   0    1.44    0.18
  -3  -8   0    1.62    0.22
   3  -8   0    1.40    0.23
  -3   8   0    1.37    0.23
  -3   8   0    1.57    0.20
   3   8   0    1.53    0.22
   3   8   0    1.60    0.24
  -3   8   0    1.48    0.20
   3   8   0    1.49    0.20
   4  -8   0    1.46    0.21
  -4  -8   0    1.14    0.18
  -4  -8   0    0.65    0.23
   4  -8   0    1.25    0.23
  -4  -8   0    1.12    0.23
   4  -8   0    1.25    0.19
  -4   8   0    1.21    0.31
  -4   8   0    1.24    0.23
   4   8   0    1.27    0.21
   4   8   0    1.06    0.22
   4   8   0    1.23    0.18
  -4   8   0    1.11    0.14
  -5  -8   0   10.86    0.43
   5  -8   0   10.73    0.39
  -5  -8   0   10.99    0.38
   5  -8   0   10.96    0.32
   5  -8   0   10.63    0.42
  -5   8   0   10.59    0.44
  -5   8   0   11.08    0.40
  -5   8   0   11.06    0.31
  -5   8   0   11.54    0.49
   5   8   0   10.78    0.40
   5   8   0   11.15    0.38
   5   8   0   10.39    0.37
   6  -8   0    1.27    0.23
   6  -8   0    1.14    0.17
  -6  -8   0    0.83    0.19
  -6   8   0    0.80    0.28
   6   8   0    0.93    0.22
   6   8   0    1.15    0.19
  -6   8   0    1.16    0.16
  -6   8   0    1.02    0.25
   6   8   0    1.19    0.21
   7  -8   0    0.22    0.22
  -7  -8   0    0.07    0.14
  -7  -8   0    0.31    0.20
  -7  -8   0    0.39    0.26
   7  -8   0    0.44    0.24
   7   8   0    0.74    0.21
   7   8   0    0.21    0.18
   7   8   0    0.32    0.22
  -7   8   0    0.03    0.25
  -7   8   0    0.39    0.30
  -7   8   0    0.55    0.15
  -7   8   0    0.29    0.22
   8  -8   0   13.05    0.48
  -8  -8   0   13.35    0.39
  -8  -8   0   13.17    0.43
   8  -8   0   13.20    0.46
  -8  -8   0   13.15    0.45
  -8   8   0   13.64    0.54
  -8   8   0   12.46    0.82
   8   8   0   12.93    0.52
  -8   8   0   12.94    0.37
  -8   8   0   13.32    0.48
  -9  -8   0    3.77    0.40
   9  -8   0    3.90    0.37
  -9  -8   0    4.42    0.36
  -9  -8   0    3.87    0.31
  -9  -8   0    4.29    0.33
   9  -8   0    4.29    0.37
   9   8   0    4.84    0.45
  -9   8   0    4.42    0.27
  -9   8   0    4.70    0.39
  -9   8   0    3.96    0.44
  -9   8   0    4.28    0.55
 -10  -8   0    1.38    0.26
 -10  -8   0    1.32    0.27
 -10  -8   0    1.82    0.27
 -10  -8   0    1.49    0.33
  10   8   0    1.30    0.31
 -10   8   0    1.33    0.27
 -10   8   0    1.30    0.38
 -10   8   0    1.55    0.20
 -10   8   0    1.25    0.36
 -11  -8   0    0.39    0.31
 -11  -8   0   -0.10    0.25
 -11  -8   0    0.25    0.28
 -11  -8   0    0.12    0.25
 -11   8   0    0.23    0.21
 -11   8   0    0.54    0.37
  11   8   0   -0.05    0.34
 -11   8   0   -0.21    0.28
 -11   8   0    0.51    0.35
 -12  -8   0    0.86    0.29
 -12  -8   0    0.48    0.31
 -12  -8   0    0.71    0.31
 -12   8   0   -0.10    0.37
 -12   8   0    0.67    0.24
 -12   8   0    0.69    0.33
  12   8   0    0.29    0.35
 -12   8   0    0.51    0.42
 -13  -8   0    3.75    0.46
 -13  -8   0    2.11    0.42
 -13  -8   0    3.02    0.48
 -13   8   0    2.42    0.55
 -13   8   0    2.35    0.47
 -13   8   0    2.07    0.41
   0  -9   0    1.43    0.19
   0  -9   0    1.63    0.25
   0  -9   0    1.66    0.24
   0   9   0    1.52    0.24
   0   9   0    1.33    0.20
   0   9   0    1.43    0.23
   1  -9   0    3.94    0.29
   1  -9   0    4.06    0.26
  -1  -9   0    3.88    0.28
   1  -9   0    3.95    0.34
  -1  -9   0    4.18    0.34
  -1  -9   0    3.83    0.28
   1   9   0    4.00    0.34
  -1   9   0    3.81    0.28
   1   9   0    3.97    0.17
  -1   9   0    3.81    0.34
  -1   9   0    4.02    0.28
   2  -9   0    1.89    0.22
   2  -9   0    1.80    0.22
  -2  -9   0    2.06    0.26
   2  -9   0    1.58    0.24
  -2  -9   0    2.15    0.27
  -2  -9   0    1.90    0.23
   2   9   0    1.89    0.24
   2   9   0    2.26    0.31
  -2   9   0    1.75    0.27
  -2   9   0    2.04    0.26
   2   9   0    1.91    0.26
  -3  -9   0   -0.06    0.18
   3  -9   0   -0.36    0.21
   3  -9   0    0.07    0.19
  -3  -9   0   -0.43    0.22
  -3  -9   0    0.36    0.22
   3  -9   0   -0.08    0.14
  -3   9   0   -0.11    0.16
  -3   9   0   -0.03    0.22
   3   9   0   -0.15    0.21
   3   9   0   -0.22    0.17
   3   9   0    0.02    0.14
   4  -9   0    6.86    0.41
   4  -9   0    7.28    0.28
  -4  -9   0    6.64    0.40
  -4  -9   0    7.03    0.40
   4  -9   0    7.19    0.37
  -4  -9   0    7.00    0.35
  -4   9   0    7.28    0.43
   4   9   0    7.17    0.38
   4   9   0    6.75    0.34
   4   9   0    7.07    0.30
  -4   9   0    7.16    0.29
  -4   9   0    7.28    0.36
  -5  -9   0    3.08    0.39
   5  -9   0    3.20    0.25
   5  -9   0    2.79    0.38
  -5  -9   0    3.01    0.31
   5  -9   0    3.52    0.34
   5   9   0    3.15    0.30
  -5   9   0    3.67    0.40
   5   9   0    3.74    0.29
   5   9   0    3.56    0.36
  -5   9   0    3.02    0.43
  -5   9   0    3.45    0.24
  -5   9   0    3.66    0.34
   6  -9   0    0.19    0.17
  -6  -9   0    0.05    0.21
   6  -9   0    0.19    0.26
  -6  -9   0    0.01    0.27
  -6  -9   0   -0.12    0.27
   6  -9   0    0.24    0.24
   6   9   0    0.30    0.21
  -6   9   0    0.75    0.24
  -6   9   0    0.16    0.28
   6   9   0    0.11    0.24
  -6   9   0    0.32    0.16
   6   9   0    0.25    0.19
  -6   9   0    0.05    0.26
  -7  -9   0    0.43    0.28
  -7  -9   0    0.19    0.22
   7  -9   0    0.47    0.28
  -7  -9   0    0.39    0.40
   7  -9   0    0.27    0.26
  -7   9   0   -0.01    0.28
   7   9   0    0.03    0.22
  -7   9   0    0.00    0.33
  -7   9   0    0.24    0.25
   7   9   0    0.70    0.24
  -7   9   0    0.45    0.16
   7   9   0    0.39    0.20
  -8  -9   0    6.16    0.34
   8  -9   0    6.23    0.42
  -8  -9   0    5.69    0.44
   8  -9   0    6.57    0.43
  -8  -9   0    5.88    0.38
  -8   9   0    6.01    0.28
  -8   9   0    5.68    0.48
   8   9   0    6.12    0.45
  -8   9   0    5.65    0.41
  -8   9   0    5.91    0.59
  -9  -9   0    0.01    0.31
  -9  -9   0    0.46    0.16
   9  -9   0    0.41    0.27
  -9  -9   0    0.29    0.23
  -9  -9   0    0.42    0.19
  -9   9   0    0.32    0.18
  -9   9   0    0.04    0.27
   9   9   0    0.12    0.30
  -9   9   0    0.54    0.28
  -9   9   0    0.53    0.41
 -10  -9   0    0.69    0.21
  10  -9   0    1.46    0.28
 -10  -9   0    0.96    0.24
  10  -9   0    1.37    0.28
 -10  -9   0    1.33    0.37
 -10  -9   0    0.88    0.36
 -10   9   0    0.70    0.29
 -10   9   0    1.15    0.21
  10   9   0    0.42    0.34
 -10   9   0    1.09    0.33
 -10   9   0    0.76    0.40
 -11  -9   0    1.66    0.31
 -11  -9   0    1.24    0.33
 -11  -9   0    1.83    0.25
 -11  -9   0    2.69    0.38
  11   9   0    1.68    0.37
 -11   9   0    1.78    0.23
 -11   9   0    1.00    0.34
 -11   9   0    1.50    0.44
 -11   9   0    1.81    0.37
 -12  -9   0    1.15    0.46
 -12  -9   0    0.52    0.39
 -12  -9   0    0.81    0.28
 -12  -9   0    0.44    0.30
 -12   9   0   -0.27    0.35
 -12   9   0    0.92    0.23
  12   9   0    0.63    0.38
 -12   9   0    0.78    0.41
 -12   9   0   -0.58    0.48
 -13  -9   0    2.13    0.52
 -13  -9   0    1.11    0.34
 -13  -9   0    2.06    0.49
 -13   9   0    1.57    0.46
 -13   9   0    0.94    0.58
 -13   9   0    0.68    0.41
   0 -10   0    6.87    0.35
   0 -10   0    6.46    0.41
   0 -10   0    6.75    0.33
   0  10   0    6.41    0.34
   0  10   0    6.14    0.27
   0  10   0    6.41    0.41
   1 -10   0    1.32    0.28
   1 -10   0    1.61    0.20
   1 -10   0    1.64    0.24
  -1 -10   0    1.05    0.21
  -1 -10   0    1.33    0.27
  -1 -10   0    1.29    0.22
  -1  10   0    1.15    0.20
   1  10   0    1.32    0.26
   1  10   0    1.63    0.16
  -1  10   0    1.10    0.21
   1  10   0    1.25    0.36
  -1  10   0    1.33    0.28
   2 -10   0    0.02    0.17
   2 -10   0   -0.07    0.21
  -2 -10   0    0.02    0.20
   2 -10   0   -0.09    0.26
  -2 -10   0   -0.28    0.25
  -2 -10   0    0.26    0.22
  -2  10   0    0.06    0.20
  -2  10   0   -0.16    0.23
   2  10   0   -0.19    0.23
   2  10   0    0.28    0.16
  -2  10   0    0.05    0.22
   3 -10   0    0.53    0.17
   3 -10   0    0.45    0.28
  -3 -10   0    0.43    0.24
  -3 -10   0    0.73    0.27
  -3 -10   0    0.40    0.22
   3 -10   0    0.46    0.21
  -3  10   0    0.54    0.27
   3  10   0    0.71    0.18
   3  10   0    0.82    0.27
  -3  10   0    0.40    0.25
  -3  10   0    0.68    0.23
   4 -10   0   13.10    0.53
  -4 -10   0   13.32    0.47
  -4 -10   0   13.58    0.52
   4 -10   0   13.53    0.49
  -4 -10   0   13.27    0.52
   4 -10   0   13.18    0.40
   4  10   0   12.84    0.42
  -4  10   0   13.34    0.54
  -4  10   0   12.95    0.47
   4  10   0   13.20    0.51
  -4  10   0   13.19    0.41
  -5 -10   0    1.20    0.30
  -5 -10   0    1.18    0.25
   5 -10   0    0.82    0.29
   5 -10   0    1.34    0.27
   5 -10   0    1.08    0.19
  -5 -10   0    1.39    0.30
   5  10   0    1.18    0.28
  -5  10   0    1.05    0.25
  -5  10   0    1.55    0.32
   5  10   0    1.20    0.38
   5  10   0    1.57    0.22
  -5  10   0    1.11    0.33
  -5  10   0    0.90    0.18
   6 -10   0   -0.18    0.28
   6 -10   0    0.21    0.18
  -6 -10   0   -0.04    0.29
   6 -10   0    0.24    0.26
  -6 -10   0    0.14    0.23
   6  10   0    0.29    0.26
   6  10   0    0.07    0.22
   6  10   0    0.47    0.24
  -6  10   0    0.06    0.31
  -6  10   0    0.14    0.16
  -6  10   0    0.64    0.32
  -6  10   0   -0.23    0.24
   7 -10   0    2.11    0.31
  -7 -10   0    2.13    0.36
  -7 -10   0    2.03    0.33
  -7 -10   0    2.03    0.28
   7 -10   0    2.42    0.30
  -7  10   0    2.18    0.37
  -7  10   0    1.65    0.24
   7  10   0    1.98    0.24
  -7  10   0    1.85    0.29
   7  10   0    2.57    0.37
   7  10   0    1.75    0.28
  -7  10   0    1.81    0.38
  -8 -10   0    1.92    0.30
   8 -10   0    1.82    0.32
  -8 -10   0    1.69    0.38
  -8 -10   0    1.75    0.35
   8 -10   0    1.64    0.30
  -8  10   0    1.70    0.25
   8  10   0    1.71    0.23
  -8  10   0    2.20    0.35
  -8  10   0    1.41    0.38
   8  10   0    1.95    0.27
  -8  10   0    1.71    0.33
  -9 -10   0    7.62    0.51
  -9 -10   0    8.16    0.57
   9 -10   0    7.62    0.59
  -9 -10   0    7.85    0.45
   9 -10   0    7.62    0.48
  -9  10   0    7.56    0.32
  -9  10   0    7.07    0.62
  -9  10   0    7.04    0.54
  -9  10   0    7.64    0.49
  10 -10   0    0.09    0.29
 -10 -10   0   -0.16    0.23
 -10 -10   0   -0.29    0.32
 -10 -10   0    0.29    0.39
  10 -10   0    0.03    0.34
 -10 -10   0   -0.12    0.26
 -10  10   0   -0.02    0.35
 -10  10   0   -0.53    0.50
 -10  10   0    0.05    0.43
 -10  10   0   -0.34    0.31
  10  10   0    0.23    0.33
 -11 -10   0   10.55    0.49
 -11 -10   0    9.55    0.61
 -11 -10   0   10.03    0.53
 -11 -10   0   11.23    0.70
 -11  10   0   11.27    0.81
 -11  10   0   10.72    0.66
 -11  10   0    8.82    0.60
  11  10   0   11.36    0.68
 -12 -10   0   -0.14    0.50
 -12 -10   0    0.77    0.25
 -12 -10   0   -0.07    0.35
 -12 -10   0    0.82    0.45
 -12  10   0    1.03    0.40
 -12  10   0   -0.34    0.41
  12  10   0    0.38    0.52
 -12  10   0    0.46    0.55
   0 -11   0   11.29    0.53
   0 -11   0   11.19    0.43
   0 -11   0   11.56    0.46
   0  11   0   11.50    0.52
   0  11   0   11.19    0.45
   0  11   0   10.40    0.35
  -1 -11   0   17.48    0.61
  -1 -11   0   17.55    0.55
  -1 -11   0   17.52    0.54
   1 -11   0   16.78    0.50
   1 -11   0   17.41    0.61
   1 -11   0   17.91    0.56
  -1  11   0   17.68    0.54
   1  11   0   17.33    0.61
  -1  11   0   15.98    0.49
  -1  11   0   17.05    0.61
   1  11   0   17.64    0.54
   2 -11   0    5.04    0.33
  -2 -11   0    4.96    0.45
  -2 -11   0    5.97    0.40
   2 -11   0    5.47    0.46
  -2 -11   0    5.45    0.39
   2 -11   0    6.14    0.41
   2  11   0    5.87    0.46
  -2  11   0    5.91    0.47
   2  11   0    5.68    0.32
  -2  11   0    5.31    0.38
  -2  11   0    5.28    0.38
   2  11   0    5.26    0.37
   3 -11   0    9.00    0.44
  -3 -11   0    8.52    0.43
   3 -11   0    9.08    0.36
  -3 -11   0    8.65    0.50
   3 -11   0    7.99    0.50
  -3 -11   0    8.80    0.46
  -3  11   0    8.84    0.43
   3  11   0    8.46    0.41
  -3  11   0    8.55    0.49
  -3  11   0    8.79    0.51
   3  11   0    8.84    0.49
   3  11   0    8.43    0.36
  -4 -11   0    2.78    0.34
  -4 -11   0    2.93    0.39
  -4 -11   0    3.01    0.37
   4 -11   0    3.10    0.45
   4 -11   0    2.76    0.28
   4 -11   0    3.36    0.40
   4  11   0    2.52    0.34
   4  11   0    3.15    0.42
   4  11   0    2.91    0.31
  -4  11   0    2.35    0.42
  -4  11   0    2.89    0.38
  -4  11   0    2.70    0.38
  -5 -11   0    3.85    0.39
   5 -11   0    4.21    0.46
   5 -11   0    4.98    0.42
  -5 -11   0    3.64    0.45
   5 -11   0    4.34    0.30
  -5  11   0    4.64    0.32
   5  11   0    4.64    0.38
  -5  11   0    4.46    0.49
   5  11   0    4.17    0.35
  -5  11   0    3.71    0.49
   5  11   0    4.59    0.45
  -5  11   0    3.81    0.40
  -5  11   0    4.73    0.52
  -6 -11   0   11.08    0.54
  -6 -11   0    9.64    0.53
   6 -11   0    9.97    0.54
   6 -11   0   10.86    0.51
   6 -11   0   10.35    0.37
  -6  11   0   11.11    0.62
   6  11   0   10.35    0.55
   6  11   0   10.46    0.46
   6  11   0   11.14    0.51
  -6  11   0   11.02    0.57
  -6  11   0   10.96    0.62
  -6  11   0   10.13    0.37
  -6  11   0   10.40    0.49
  -7 -11   0    1.06    0.35
  -7 -11   0    0.98    0.36
  -7 -11   0    0.78    0.26
   7 -11   0    1.08    0.32
   7 -11   0    0.88    0.33
   7  11   0    0.97    0.30
  -7  11   0    1.04    0.19
  -7  11   0    1.10    0.38
  -7  11   0    0.96    0.29
  -7  11   0    1.45    0.39
   7  11   0    1.13    0.30
  -7  11   0    0.92    0.35
  -8 -11   0    1.60    0.29
  -8 -11   0    2.05    0.38
   8 -11   0    2.26    0.35
  -8 -11   0    2.13    0.39
   8 -11   0    2.15    0.35
   8  11   0    1.84    0.27
  -8  11   0    2.08    0.26
   8  11   0    2.02    0.30
  -8  11   0    1.76    0.38
  -8  11   0    2.32    0.43
  -8  11   0    1.91    0.35
   8  11   0    1.85    0.33
  -9 -11   0    1.60    0.39
  -9 -11   0    2.26    0.41
  -9 -11   0    2.52    0.34
   9 -11   0    1.55    0.35
   9 -11   0    2.07    0.37
  -9  11   0    2.20    0.35
  -9  11   0    2.01    0.35
   9  11   0    1.87    0.36
  -9  11   0    2.74    0.37
 -10 -11   0    0.07    0.37
 -10 -11   0    0.53    0.29
  10 -11   0    0.75    0.38
 -10 -11   0    0.18    0.40
  10 -11   0   -0.09    0.34
 -10  11   0    0.16    0.47
 -10  11   0    0.18    0.41
 -10  11   0    0.39    0.39
  10  11   0    0.21    0.39
 -11 -11   0    1.75    0.36
 -11 -11   0    2.55    0.48
 -11 -11   0    2.99    0.49
 -11  11   0    2.42    0.61
  11  11   0    2.09    0.46
 -11  11   0    2.46    0.45
 -11  11   0    2.59    0.52
 -12 -11   0    0.65    0.38
 -12 -11   0    0.63    0.50
 -12 -11   0    0.32    0.49
  12  11   0   -0.04    0.62
 -12  11   0   -0.38    0.55
 -12  11   0    1.07    0.44
   0 -12   0   73.41    1.47
   0  12   0   74.20    1.49
   0  12   0   73.20    1.55
   0  12   0   69.08    1.39
   1 -12   0   19.34    0.57
  -1 -12   0   19.87    0.68
   1 -12   0   21.31    0.69
   1 -12   0   18.60    0.90
  -1 -12   0   20.21    0.61
   1  12   0   20.19    0.60
  -1  12   0   20.29    0.61
   1  12   0   20.35    0.68
  -1  12   0   20.07    0.95
  -1  12   0   19.36    0.55
   2 -12   0    8.30    0.54
  -2 -12   0    9.40    0.48
   2 -12   0    8.69    0.68
  -2 -12   0    8.68    0.54
   2 -12   0    9.37    0.40
  -2 -12   0    7.71    0.66
  -2  12   0    8.53    0.57
  -2  12   0    7.80    0.44
   2  12   0    9.46    0.39
   2  12   0    9.08    0.53
   2  12   0    9.64    0.45
   3 -12   0    1.41    0.51
  -3 -12   0    0.34    0.32
  -3 -12   0    0.83    0.29
   3 -12   0    0.78    0.35
  -3 -12   0    1.01    0.29
   3 -12   0    0.73    0.22
   3  12   0    0.35    0.25
   3  12   0    0.70    0.34
  -3  12   0    0.72    0.32
   3  12   0    0.93    0.22
  -3  12   0    0.33    0.34
  -4 -12   0    1.20    0.36
   4 -12   0    1.09    0.51
   4 -12   0    1.04    0.22
  -4 -12   0    0.74    0.28
   4 -12   0    0.41    0.34
  -4 -12   0    0.89    0.44
   4  12   0    0.98    0.34
   4  12   0    0.76    0.26
   4  12   0    0.79    0.24
  -4  12   0    1.05    0.36
  -4  12   0    0.76    0.28
  -4  12   0    1.03    0.39
   5 -12   0   10.25    0.39
  -5 -12   0    9.75    0.55
  -5 -12   0   10.56    0.54
  -5 -12   0   10.63    0.51
   5  12   0   10.81    0.55
  -5  12   0   10.87    0.60
   5  12   0   10.45    0.48
  -5  12   0    9.53    0.50
   5  12   0    9.95    0.45
  -5  12   0   10.52    0.58
  -5  12   0    8.83    0.73
   6 -12   0    8.37    0.55
  -6 -12   0    8.55    0.55
  -6 -12   0    7.38    0.54
  -6 -12   0    8.37    0.50
   6 -12   0    8.72    0.38
   6  12   0    8.63    0.53
   6  12   0    8.17    0.46
  -6  12   0    9.36    0.62
  -6  12   0    7.96    0.50
  -6  12   0    9.20    0.60
  -6  12   0    9.44    0.65
   6  12   0    8.68    0.45
  -7 -12   0    2.49    0.41
   7 -12   0    2.34    0.39
   7 -12   0    2.33    0.32
   7 -12   0    2.06    0.61
  -7 -12   0    2.46    0.33
  -7 -12   0    2.34    0.44
   7  12   0    2.50    0.36
  -7  12   0    2.05    0.37
  -7  12   0    2.77    0.32
  -7  12   0    2.68    0.43
   7  12   0    2.63    0.39
   7  12   0    2.12    0.45
  -7  12   0    2.12    0.42
  -7  12   0    2.85    0.45
  -8 -12   0    4.00    0.57
  -8 -12   0    4.03    0.43
   8 -12   0    3.44    0.52
   8 -12   0    3.60    0.43
  -8 -12   0    3.64    0.45
  -8  12   0    3.32    0.41
  -8  12   0    4.12    0.65
  -8  12   0    4.13    0.57
  -8  12   0    3.74    0.31
   8  12   0    3.59    0.48
   8  12   0    3.50    0.49
   8  12   0    3.98    0.45
   9 -12   0    4.20    0.54
  -9 -12   0    3.75    0.57
  -9 -12   0    3.96    0.50
  -9 -12   0    3.89    0.48
   9 -12   0    5.87    0.54
   9  12   0    4.46    0.57
  -9  12   0    5.12    0.61
  -9  12   0    4.12    0.43
  -9  12   0    4.26    0.57
 -10 -12   0    1.46    0.44
  10 -12   0    1.50    0.40
 -10 -12   0    1.87    0.37
  10 -12   0    2.15    0.44
 -10 -12   0    1.63    0.50
  10  12   0    1.31    0.44
 -10  12   0    0.93    0.50
 -10  12   0    1.45    0.46
 -11 -12   0   -0.09    0.56
  11 -12   0    1.29    0.40
 -11 -12   0    1.08    0.54
 -11 -12   0    1.35    0.37
  11  12   0    1.68    0.53
 -11  12   0    1.68    0.53
   0 -13   0    2.90    0.38
   0 -13   0    2.92    0.42
   0  13   0    2.31    0.30
   0  13   0    2.31    0.26
   0  13   0    2.62    0.38
   1 -13   0    9.43    0.44
  -1 -13   0    8.67    0.50
  -1 -13   0    9.04    0.48
   1 -13   0    9.54    0.52
   1  13   0    9.70    0.58
  -1  13   0    8.77    0.40
   1  13   0    8.88    0.48
  -1  13   0    9.50    0.58
   2 -13   0    4.51    0.36
  -2 -13   0    4.58    0.44
   2 -13   0    4.18    0.55
  -2 -13   0    4.36    0.46
   2 -13   0    4.68    0.46
  -2 -13   0    4.14    0.52
  -2  13   0    4.43    0.40
   2  13   0    4.85    0.38
  -2  13   0    4.83    0.52
   2  13   0    4.26    0.43
   2  13   0    5.05    0.52
   3 -13   0    0.00    0.23
  -3 -13   0    0.32    0.32
   3 -13   0   -0.58    0.43
   3 -13   0    0.45    0.34
  -3 -13   0    0.20    0.36
  -3 -13   0    0.20    0.30
   3  13   0   -0.51    0.57
  -3  13   0    0.23    0.30
   3  13   0   -0.04    0.26
  -3  13   0    0.41    0.37
  -4 -13   0    8.77    0.59
   4 -13   0    8.96    0.54
  -4 -13   0    9.24    0.54
   4 -13   0    9.27    0.41
  -4 -13   0   10.18    0.53
  -4  13   0    8.49    0.55
   4  13   0    9.53    0.70
   4  13   0    8.99    0.56
  -4  13   0    9.93    0.55
   4  13   0    8.80    0.48
  -4  13   0    9.11    0.60
   5 -13   0    2.79    0.37
  -5 -13   0    2.81    0.38
  -5 -13   0    1.86    0.40
  -5 -13   0    2.94    0.45
   5 -13   0    2.42    0.33
   5  13   0    3.07    0.40
  -5  13   0    3.17    0.43
   5  13   0    2.67    0.36
  -5  13   0    2.31    0.35
  -5  13   0    2.86    0.44
  -5  13   0    2.56    0.44
   6 -13   0    2.87    0.38
  -6 -13   0    3.10    0.42
  -6 -13   0    2.79    0.36
   6 -13   0    3.18    0.34
  -6 -13   0    2.07    0.41
  -6  13   0    2.80    0.42
   6  13   0    2.84    0.44
  -6  13   0    2.44    0.38
  -6  13   0    3.09    0.46
   6  13   0    2.77    0.35
   6  13   0    2.99    0.41
  -7 -13   0    1.53    0.36
   7 -13   0    1.70    0.25
  -7 -13   0    1.41    0.43
  -7 -13   0    1.71    0.38
   7 -13   0    1.07    0.38
  -7  13   0    0.81    0.39
   7  13   0    1.26    0.37
  -7  13   0    1.31    0.45
   7  13   0    1.58    0.33
   7  13   0    1.33    0.32
  -7  13   0    0.72    0.40
  -8 -13   0    1.00    0.36
   8 -13   0    0.73    0.41
  -8 -13   0    1.31    0.38
  -8 -13   0    0.98    0.49
   8  13   0    0.40    0.35
  -8  13   0    0.77    0.53
  -8  13   0    0.39    0.45
  -8  13   0    0.67    0.58
   8  13   0    1.51    0.33
   8  13   0    0.68    0.43
  -8  13   0    0.67    0.44
   9 -13   0    3.53    0.52
   9 -13   0    2.78    0.44
  -9 -13   0    2.83    0.53
  -9 -13   0    2.18    0.53
  -9 -13   0    3.49    0.41
  -9  13   0    4.47    0.73
  -9  13   0    3.36    0.49
   9  13   0    2.75    0.47
 -10 -13   0    0.32    0.57
 -10 -13   0    0.30    0.38
  10 -13   0    0.73    0.52
 -10  13   0   -0.35    0.54
 -10  13   0   -0.11    0.47
  10  13   0    0.52    0.68
   0 -14   0   26.25    0.77
   0 -14   0   25.93    0.72
   0  14   0   23.32    0.58
   0  14   0   24.63    0.82
  -1 -14   0   -0.05    0.35
  -1 -14   0    0.05    0.32
   1 -14   0    0.11    0.34
   1 -14   0    0.07    0.27
  -1  14   0    0.06    0.23
  -1  14   0   -0.09    0.38
   1  14   0    0.42    0.37
  -1  14   0    0.22    0.29
  -2 -14   0    0.23    0.41
   2 -14   0   -0.25    0.26
  -2 -14   0   -0.09    0.32
   2 -14   0    0.00    0.33
   2 -14   0    0.24    0.36
  -2 -14   0   -0.33    0.31
   2  14   0    0.18    0.31
   2  14   0   -0.26    0.38
  -2  14   0   -0.13    0.38
  -2  14   0   -0.56    0.28
  -3 -14   0    1.86    0.37
   3 -14   0    1.41    0.28
   3 -14   0    1.58    0.39
  -3 -14   0    1.77    0.36
  -3 -14   0    1.68    0.48
  -3  14   0    0.86    0.58
   3  14   0    1.97    0.43
   3  14   0    1.55    0.36
  -3  14   0    1.95    0.40
   4 -14   0    1.53    0.38
   4 -14   0    2.04    0.28
  -4 -14   0    1.66    0.36
  -4 -14   0    2.00    0.40
  -4 -14   0    1.61    0.38
  -4  14   0    1.34    0.39
   4  14   0    1.15    0.32
  -4  14   0    1.33    0.41
  -4  14   0    0.74    0.31
   4  14   0    2.34    0.42
   4  14   0    1.76    0.31
  -4  14   0    1.93    0.44
   5 -14   0    1.06    0.27
  -5 -14   0    1.29    0.38
   5 -14   0    0.78    0.37
  -5 -14   0    0.80    0.47
   5 -14   0    0.68    0.37
  -5 -14   0    1.64    0.36
  -5  14   0    0.32    0.36
   5  14   0    0.73    0.34
   5  14   0    0.83    0.40
   5  14   0    1.05    0.36
  -5  14   0    1.17    0.42
  -5  14   0    0.96    0.43
  -5  14   0    1.76    0.36
  -6 -14   0    1.41    0.48
   6 -14   0    2.51    0.39
  -6 -14   0    2.64    0.40
   6 -14   0    2.70    0.37
  -6 -14   0    2.52    0.43
  -6  14   0    1.62    0.63
  -6  14   0    2.76    0.47
   6  14   0    2.29    0.36
  -6  14   0    3.07    0.55
  -6  14   0    2.87    0.49
   7 -14   0   -0.53    0.51
   7 -14   0    0.08    0.39
  -7 -14   0   -0.31    0.37
   7 -14   0    0.52    0.26
  -7 -14   0    0.76    0.40
  -7 -14   0   -0.41    0.47
  -7  14   0    0.96    0.47
  -7  14   0    0.94    0.50
   7  14   0    0.42    0.34
  -7  14   0    0.28    0.45
   7  14   0   -0.09    0.36
   7  14   0   -0.01    0.40
   8 -14   0    0.77    0.45
  -8 -14   0    0.86    0.47
  -8 -14   0    1.02    0.40
  -8  14   0    0.70    0.52
   8  14   0    0.67    0.41
   8  14   0    1.66    0.44
   8  14   0    0.88    0.38
  -8  14   0    1.20    0.57
  -8  14   0    0.36    0.56
   9 -14   0    1.28    0.55
  -9 -14   0    0.24    0.43
   9 -14   0    0.55    0.43
  -9 -14   0    0.91    0.53
  -9  14   0   -1.00    0.54
   0 -15   0    3.88    0.58
   0 -15   0    5.60    0.57
   0  15   0    4.46    0.29
   0  15   0    4.52    0.49
   0  15   0    6.32    0.60
  -1 -15   0    2.08    0.34
   1 -15   0    2.34    0.37
   1 -15   0    1.74    0.33
  -1 -15   0    2.16    0.39
   1  15   0    2.00    0.38
  -1  15   0    2.45    0.45
   1  15   0    1.76    0.30
   1  15   0    1.69    0.44
  -1  15   0    2.03    0.28
  -1  15   0    1.41    0.38
  -2 -15   0    0.17    0.34
  -2 -15   0   -0.04    0.34
  -2 -15   0    0.51    0.49
   2 -15   0    0.36    0.38
   2 -15   0    0.54    0.44
   2 -15   0    0.29    0.29
   2  15   0    0.17    0.27
   2  15   0    0.31    0.41
  -2  15   0    0.05    0.41
   2  15   0    0.42    0.35
  -2  15   0    0.27    0.29
  -2  15   0    0.45    0.35
  -3 -15   0   -0.34    0.39
   3 -15   0    0.24    0.44
   3 -15   0   -0.36    0.37
   3 -15   0   -0.26    0.27
  -3 -15   0    0.43    0.35
   3  15   0   -0.12    0.27
  -3  15   0    0.08    0.34
   3  15   0    0.19    0.32
   3  15   0    0.04    0.40
  -3  15   0    0.13    0.44
  -3  15   0   -0.39    0.36
  -4 -15   0    1.54    0.77
   4 -15   0    0.12    0.38
  -4 -15   0    0.68    0.41
  -4 -15   0    0.72    0.38
   4 -15   0    0.63    0.28
  -4  15   0    0.89    0.45
   4  15   0    1.14    0.35
  -4  15   0    0.23    0.46
   4  15   0    0.84    0.30
   4  15   0    0.20    0.43
  -5 -15   0    0.76    0.43
   5 -15   0    0.99    0.49
   5 -15   0    1.17    0.28
   5 -15   0    1.25    0.42
  -5 -15   0    1.49    0.40
  -5  15   0    1.63    0.49
  -5  15   0    1.41    0.49
   5  15   0    1.01    0.45
  -5  15   0    1.24    0.43
   5  15   0    1.01    0.35
   6 -15   0    0.06    0.56
   6 -15   0    0.52    0.42
   6 -15   0    1.13    0.28
  -6 -15   0    1.17    0.43
  -6 -15   0    1.18    0.42
  -6  15   0    1.06    0.49
  -6  15   0    0.12    0.53
   6  15   0    0.84    0.37
   6  15   0    0.59    0.46
  -7 -15   0    0.32    0.43
   7 -15   0    0.57    0.42
  -7 -15   0    0.91    0.48
   7 -15   0    0.17    0.48
  -7  15   0    1.05    0.53
  -7  15   0    0.88    0.53
   7  15   0    0.99    0.44
   7  15   0    1.24    0.41
  -7  15   0    0.33    0.60
   7  15   0    0.67    0.40
   8 -15   0    1.10    0.46
  -8 -15   0    1.72    0.51
   8 -15   0    1.05    0.59
  -8 -15   0    0.52    0.39
   8  15   0    1.68    0.64
   8  15   0    1.09    0.46
  -8  15   0    1.22    0.52
   0 -16   0    8.59    0.56
   0 -16   0   10.23    0.68
   0  16   0    9.45    0.72
   1 -16   0    3.09    0.46
   1 -16   0    3.41    0.46
  -1 -16   0    3.49    0.43
  -1 -16   0    3.00    0.39
   1  16   0    2.92    0.51
  -1  16   0    2.95    0.52
  -1  16   0    3.25    0.40
   1  16   0    2.94    0.46
  -2 -16   0    0.42    0.40
  -2 -16   0   -0.22    0.39
   2 -16   0    1.58    0.37
  -2  16   0   -0.10    0.49
   2  16   0   -0.05    0.33
   2  16   0   -0.19    0.42
   2  16   0    0.77    0.49
   3 -16   0    0.37    0.44
  -3 -16   0   -0.20    0.40
  -3 -16   0   -0.58    0.45
   3 -16   0   -0.18    0.31
   3  16   0    0.09    0.34
   3  16   0   -0.67    0.49
  -3  16   0    0.05    0.40
   3  16   0   -0.47    0.39
  -3  16   0    0.34    0.47
   4 -16   0    3.49    0.47
   4 -16   0    3.03    0.45
  -4 -16   0    2.55    0.47
  -4 -16   0    1.16    0.46
  -4  16   0    2.61    0.55
   4  16   0    1.78    0.45
  -4  16   0    2.52    0.49
   4  16   0    2.26    0.51
   4  16   0    2.35    0.39
  -4  16   0    2.43    0.55
  -5 -16   0   -0.13    0.46
  -5 -16   0    0.54    0.45
   5 -16   0    0.09    0.45
   5  16   0    0.90    0.39
   5  16   0    0.22    0.50
  -5  16   0   -0.29    0.50
   5  16   0   -0.65    0.46
  -5  16   0    0.84    0.53
  -5  16   0    0.68    0.55
  -6 -16   0    0.06    0.48
   6 -16   0    0.38    0.31
  -6 -16   0    1.30    0.52
   6 -16   0    0.82    0.47
  -6  16   0    0.15    0.57
  -6  16   0   -0.21    0.59
   6  16   0    0.05    0.49
   6  16   0    0.39    0.48
  -6  16   0    0.49    0.55
   7 -16   0    0.89    0.48
  -7 -16   0   -0.02    0.46
  -7  16   0    1.06    0.62
   7  16   0    0.42    0.53
   7  16   0    0.88    0.62
  -7  16   0   -0.41    0.72
  -7  16   0    0.73    0.63
   0 -17   0   11.49    0.74
   0 -17   0    9.08    0.61
   0  17   0   12.35    0.83
  -1 -17   0    6.03    0.72
  -1 -17   0    5.42    0.59
   1 -17   0    6.21    0.69
   1 -17   0    5.56    0.52
   1  17   0    6.65    0.77
   1  17   0    5.46    0.54
  -1  17   0    6.15    0.76
  -2 -17   0   -0.16    0.42
   2 -17   0   -1.16    0.51
  -2 -17   0    0.84    0.46
   2 -17   0   -0.16    0.33
   2  17   0    0.92    0.53
   2  17   0    0.64    0.35
  -2  17   0    1.11    0.54
   3 -17   0    0.42    0.48
   3 -17   0    0.67    0.34
  -3 -17   0    0.85    0.46
  -3 -17   0    0.89    0.50
   3  17   0    0.59    0.36
  -3  17   0    0.51    0.55
  -3  17   0    0.25    0.59
   3  17   0    0.97    0.55
   4 -17   0    0.76    0.35
   4 -17   0   -0.13    0.51
  -4 -17   0   -0.29    0.48
  -4  17   0    0.51    0.57
  -4  17   0    0.92    0.51
  -4  17   0    1.06    0.56
   4  17   0    0.81    0.59
   5 -17   0    3.87    0.53
  -5 -17   0    3.13    0.58
  -5  17   0    4.32    0.65
   5  17   0    4.95    0.77
   0 -18   0    5.38    0.79
   0 -18   0    3.74    0.45
   0  18   0    2.59    0.48
   0  18   0    3.90    0.71
  -1 -18   0    0.54    0.44
   1 -18   0    0.60    0.40
   1 -18   0    0.96    0.59
   1  18   0    0.79    0.66
  -1  18   0    1.46    0.64
 -15   0   1   10.78    0.57
 -15   0   1   11.56    0.61
 -14   0   1    0.23    0.45
 -14   0   1    0.89    0.27
 -14   0   1   -0.85    0.46
 -14   0   1    0.01    0.27
 -13   0   1    3.16    0.47
 -13   0   1    2.18    0.34
 -13   0   1    2.42    0.36
 -13   0   1    2.60    0.48
 -12   0   1   -0.27    0.23
 -12   0   1   -0.11    0.31
 -12   0   1    0.18    0.22
 -11   0   1    0.40    0.20
 -11   0   1    0.11    0.20
 -11   0   1    0.56    0.30
 -10   0   1   -0.18    0.16
 -10   0   1   -0.19    0.17
 -10   0   1    0.04    0.26
  10   0  -1   -0.13    0.26
  -9   0   1   12.54    0.49
  -9   0   1   12.76    0.36
  -9   0   1   12.17    0.36
   8   0  -1   -0.36    0.20
  -8   0   1    0.06    0.13
  -8   0   1   -0.12    0.18
  -8   0   1   -0.08    0.13
  -7   0   1    2.04    0.28
   7   0  -1    1.94    0.28
   6   0  -1    0.03    0.18
  -6   0   1   -0.08    0.17
  -5   0   1   36.17    0.77
   5   0  -1   35.66    0.76
   4   0  -1   -0.12    0.10
  -4   0   1   -0.16    0.10
  -3   0   1   70.19    1.32
   3   0  -1   70.17    1.32
  -2   0   1   -0.03    0.07
   2   0  -1   -0.02    0.07
  -2   0  -1   -0.04    0.07
   2   0   1   -0.08    0.07
  -2   0  -1   -0.01    0.07
  -2   0  -1    0.00    0.07
   2   0   1   -0.03    0.08
  -3   0  -1  152.06    2.81
  -3   0  -1  152.23    2.77
  -3   0  -1  158.85    2.78
   3   0   1  152.91    2.77
   3   0   1  152.60    2.77
   3   0   1  153.57    2.81
   4   0   1   -0.10    0.08
   4   0   1   -0.13    0.12
  -4   0  -1   -0.11    0.09
   4   0   1   -0.09    0.08
  -4   0  -1   -0.07    0.09
  -4   0  -1   -0.07    0.11
   5   0   1    2.68    0.25
  -5   0  -1    2.51    0.18
  -5   0  -1    2.64    0.24
  -5   0  -1    2.59    0.18
  -6   0  -1    0.04    0.18
  -6   0  -1   -0.09    0.13
  -6   0  -1   -0.09    0.13
   6   0   1   -0.38    0.18
  -7   0  -1   54.10    1.06
   7   0   1   54.28    1.16
  -7   0  -1   54.02    1.06
  -7   0  -1   54.82    1.15
  -8   0  -1    0.09    0.19
  -8   0  -1    0.10    0.14
   8   0   1    0.25    0.30
  -8   0  -1    0.12    0.15
   9   0   1    3.16    0.40
  -9   0  -1    2.87    0.28
  -9   0  -1    2.95    0.36
  -9   0  -1    3.01    0.27
  10   0   1   -0.11    0.27
 -10   0  -1    0.23    0.19
 -10   0  -1   -0.36    0.18
 -10   0  -1   -0.08    0.26
 -11   0  -1   -0.38    0.20
  11   0   1   -0.30    0.29
 -11   0  -1   -0.12    0.22
 -12   0  -1    0.45    0.37
 -12   0  -1   -0.03    0.25
 -12   0  -1   -0.09    0.23
 -13   0  -1    4.32    0.52
  13   0   1    3.02    0.45
 -13   0  -1    3.40    0.40
 -13   0  -1    4.70    0.41
 -14   0  -1   -0.04    0.30
 -14   0  -1    0.32    0.42
 -14   0  -1    0.53    0.53
 -15   0  -1    4.94    0.56
 -15   0  -1    4.94    0.63
 -15   0  -1    5.42    0.68
 -15  -1   1    0.17    0.48
 -15  -1   1    0.96    0.43
 -15  -1   1    1.14    0.32
 -15   1   1    0.17    0.35
 -15   1   1    1.56    0.38
 -15   1   1    0.36    0.42
 -14  -1   1    1.25    0.51
 -14  -1   1    1.05    0.38
 -14  -1   1    1.11    0.30
 -14   1   1    0.83    0.70
 -14   1   1    1.49    0.29
 -14   1   1    1.76    0.42
 -14   1   1    1.08    0.29
 -13  -1   1    2.68    0.36
 -13  -1   1    2.46    0.36
 -13  -1   1    2.36    0.40
 -13   1   1    2.23    0.34
 -13   1   1    2.39    0.37
 -13   1   1    2.27    0.48
 -13   1   1    3.15    0.37
 -12  -1   1   11.51    0.62
 -12  -1   1   10.61    0.58
 -12  -1   1   10.72    0.42
 -12  -1   1   10.68    0.43
 -12   1   1   10.40    0.42
 -12   1   1   10.46    0.59
 -12   1   1   10.95    0.44
 -11  -1   1   -0.14    0.20
 -11  -1   1   -0.11    0.18
 -11   1   1   -0.07    0.21
 -11   1   1   -0.13    0.19
  11   1  -1    0.06    0.31
 -10  -1   1    1.93    0.29
 -10  -1   1    2.10    0.20
 -10  -1   1    1.64    0.20
 -10   1   1    1.88    0.27
  10   1  -1    1.78    0.30
 -10   1   1    1.95    0.30
 -10   1   1    1.66    0.19
  -9  -1   1    0.67    0.15
  -9  -1   1    0.75    0.17
  -9  -1   1    0.80    0.23
  -9   1   1    0.53    0.23
   9   1  -1    0.37    0.24
  -9   1   1    0.61    0.18
  -9   1   1    0.59    0.16
  -8  -1   1    2.29    0.29
  -8  -1   1    2.53    0.20
  -8   1   1    2.16    0.33
   8   1  -1    1.89    0.31
  -8   1   1    2.52    0.22
  -8   1   1    2.62    0.21
   7  -1  -1    8.35    0.39
  -7  -1   1    8.59    0.36
  -7   1   1    8.90    0.27
  -7   1   1    9.29    0.27
   7   1  -1    9.02    0.38
  -7   1   1    9.00    0.39
  -6  -1   1   45.89    0.97
   6  -1  -1   46.97    1.00
  -6   1   1   46.71    0.90
  -6   1   1   47.29    0.90
  -6   1   1   48.02    1.00
   5  -1  -1   14.78    0.42
  -5  -1   1   14.60    0.39
  -5   1   1   13.94    0.41
   5   1  -1   14.62    0.40
  -4  -1   1    2.18    0.17
   4   1  -1    2.19    0.18
  -4   1   1    2.02    0.20
  -3  -1   1  139.92    2.58
  -3   1   1  141.34    2.60
   3   1  -1  143.70    2.58
  -2  -1   1   51.26    0.93
  -2  -1   1   49.70    0.93
   2   1  -1   49.30    0.93
   2  -1   1  105.09    1.89
  -2  -1  -1  103.32    1.87
  -2  -1  -1  101.49    1.86
  -2  -1  -1  102.13    1.88
   2  -1   1  103.67    1.87
   2  -1   1  104.58    1.87
   2   1   1  101.53    1.86
  -2   1  -1  102.19    1.89
  -2   1  -1  103.74    1.87
   2   1   1  103.31    1.88
   2   1   1  102.25    1.86
  -2   1  -1  102.91    1.87
  -2   1  -1  102.29    1.87
  -3  -1  -1   19.34    0.41
   3  -1   1   19.88    0.46
   3  -1   1   19.94    0.41
   3  -1   1   19.24    0.41
  -3  -1  -1   19.78    0.44
  -3  -1  -1   19.53    0.41
  -3   1  -1   19.86    0.41
   3   1   1   18.91    0.40
   3   1   1   19.24    0.44
  -3   1  -1   19.79    0.42
  -3   1  -1   19.31    0.46
   3   1   1   19.36    0.40
  -4  -1  -1    0.07    0.09
   4  -1   1    0.05    0.09
  -4  -1  -1    0.08    0.09
  -4  -1  -1    0.27    0.11
   4  -1   1    0.25    0.09
   4  -1   1    0.40    0.14
   4   1   1    0.16    0.08
  -4   1  -1    0.22    0.09
  -4   1  -1    0.13    0.12
   4   1   1    0.10    0.08
   4   1   1    0.06    0.12
  -4   1  -1    0.25    0.10
   5  -1   1    0.17    0.15
  -5  -1  -1    0.02    0.13
   5  -1   1    0.26    0.11
  -5  -1  -1    0.15    0.11
  -5   1  -1    0.28    0.12
  -5   1  -1    0.18    0.15
  -5   1  -1    0.22    0.12
   5   1   1    0.12    0.15
  -6  -1  -1    6.32    0.25
  -6  -1  -1    6.18    0.31
   6  -1   1    5.65    0.35
  -6   1  -1    6.37    0.26
  -6   1  -1    6.45    0.27
   6   1   1    5.92    0.34
  -6   1  -1    6.15    0.33
  -7  -1  -1    3.96    0.29
  -7  -1  -1    3.80    0.23
  -7  -1  -1    3.72    0.24
   7  -1   1    3.71    0.33
  -7   1  -1    3.69    0.24
  -7   1  -1    3.92    0.25
   7   1   1    3.89    0.33
  -7   1  -1    3.73    0.31
  -8  -1  -1    3.88    0.24
  -8  -1  -1    3.48    0.31
   8  -1   1    4.11    0.37
  -8  -1  -1    4.05    0.25
  -8   1  -1    3.83    0.34
  -8   1  -1    4.24    0.26
   8   1   1    3.67    0.42
  -8   1  -1    4.16    0.26
  -9  -1  -1    5.34    0.30
   9  -1   1    5.24    0.42
  -9  -1  -1    5.32    0.29
  -9  -1  -1    5.45    0.40
  -9   1  -1    5.24    0.30
  -9   1  -1    5.49    0.41
   9   1   1    4.89    0.48
  -9   1  -1    5.13    0.31
 -10  -1  -1   18.71    0.51
  10  -1   1   17.79    0.65
 -10  -1  -1   18.94    0.62
 -10  -1  -1   18.31    0.50
 -10   1  -1   18.17    0.52
 -10   1  -1   17.80    0.51
  10   1   1   17.80    0.64
 -10   1  -1   17.93    0.63
 -11  -1  -1    0.44    0.22
  11  -1   1    0.35    0.35
 -11  -1  -1    0.49    0.22
 -11  -1  -1    0.38    0.46
 -11   1  -1   -0.06    0.27
 -11   1  -1    0.59    0.24
 -11   1  -1    0.12    0.24
  11   1   1    0.59    0.30
 -12  -1  -1    0.06    0.24
 -12  -1  -1    0.00    0.23
 -12  -1  -1   -0.09    0.31
 -12   1  -1   -0.11    0.31
 -12   1  -1   -0.04    0.24
 -13  -1  -1    0.68    0.26
 -13  -1  -1    0.57    0.28
 -13  -1  -1    1.11    0.36
 -13   1  -1    1.31    0.29
  13   1   1    0.31    0.40
 -13   1  -1    1.01    0.27
 -13   1  -1    0.46    0.28
 -13   1  -1    0.46    0.27
 -14  -1  -1    1.67    0.42
 -14  -1  -1    1.95    0.33
 -14  -1  -1    2.00    0.42
 -14   1  -1    2.32    0.36
 -14   1  -1    1.47    0.46
  14   1   1    1.78    0.56
 -14   1  -1    1.95    0.30
 -15  -1  -1    1.45    0.35
 -15  -1  -1    1.99    0.43
 -15   1  -1    1.44    0.45
 -15   1  -1    0.45    0.40
 -15   1  -1    2.06    0.35
 -15  -2   1    4.27    0.62
 -15  -2   1    5.51    0.49
 -15   2   1    5.19    0.59
 -15   2   1    3.59    0.53
 -15   2   1    5.61    0.52
 -15   2   1    6.24    0.76
 -14  -2   1    0.50    0.30
 -14  -2   1   -0.19    0.47
 -14  -2   1    0.24    0.37
 -14  -2   1    0.96    0.28
 -14   2   1    0.38    0.30
 -14   2   1    0.10    0.28
 -14   2   1    0.30    0.45
 -14   2   1    0.30    0.32
 -13  -2   1    0.08    0.33
 -13  -2   1    0.02    0.36
 -13  -2   1    0.37    0.24
 -13  -2   1    0.25    0.33
 -13   2   1    0.03    0.27
 -13   2   1   -0.22    0.42
 -13   2   1    0.33    0.32
 -13   2   1    0.37    0.25
 -12  -2   1    0.25    0.29
 -12  -2   1    0.26    0.23
 -12  -2   1    0.33    0.34
 -12  -2   1   -0.08    0.21
 -12   2   1    0.09    0.22
  12   2  -1    0.21    0.31
 -12   2   1   -0.28    0.29
 -12   2   1    0.15    0.31
 -11  -2   1    1.46    0.21
 -11  -2   1    1.19    0.26
 -11  -2   1    1.10    0.22
  11   2  -1    1.66    0.32
 -11   2   1    1.72    0.22
 -11   2   1    1.35    0.31
 -11   2   1    1.84    0.24
 -10  -2   1    6.28    0.43
 -10  -2   1    5.88    0.30
 -10  -2   1    6.17    0.31
 -10   2   1    6.25    0.30
 -10   2   1    6.01    0.46
  10   2  -1    5.43    0.70
 -10   2   1    6.18    0.34
  -9  -2   1    5.35    0.26
  -9  -2   1    5.59    0.37
  -9   2   1    5.05    0.42
  -9   2   1    5.14    0.29
  -9   2   1    4.92    0.27
   9   2  -1    5.06    0.41
  -8  -2   1    3.77    0.29
  -8  -2   1    3.89    0.21
  -8  -2   1    4.14    0.23
  -8   2   1    3.85    0.36
  -8   2   1    3.90    0.25
   8   2  -1    3.35    0.34
  -8   2   1    3.88    0.23
  -7  -2   1    7.71    0.33
  -7   2   1    7.41    0.37
  -7   2   1    7.28    0.26
   7   2  -1    7.21    0.36
  -7   2   1    7.45    0.28
  -6  -2   1    4.91    0.27
  -6   2   1    4.93    0.21
  -6   2   1    4.46    0.32
  -6   2   1    4.60    0.23
   6   2  -1    4.66    0.29
  -5  -2   1   28.48    0.62
  -5   2   1   28.03    0.66
  -5   2   1   28.33    0.58
  -5   2   1   28.47    0.57
   5   2  -1   28.58    0.63
  -4  -2   1    0.21    0.10
  -4   2   1    0.02    0.12
   4   2  -1    0.02    0.11
  -4   2   1    0.27    0.09
  -4   2   1    0.15    0.08
  -3  -2   1   96.65    1.80
  -3  -2   1   97.68    1.78
   3  -2  -1   99.01    1.79
   3  -2  -1   97.77    1.78
  -3  -2   1  100.21    1.78
  -3   2   1  100.95    1.85
  -3   2   1   98.02    1.79
   3   2  -1   97.55    1.81
  -3   2   1   99.01    1.80
  -3   2   1   98.18    1.78
   2  -2  -1   74.74    1.34
  -2  -2   1   72.76    1.33
   2  -2  -1   72.74    1.34
  -2  -2   1   73.80    1.34
  -2  -2   1   74.47    1.34
  -2  -2   1   72.19    1.34
  -2   2   1   73.67    1.34
  -2   2   1   74.92    1.35
   2   2  -1   72.87    1.34
  -1  -2   1   35.75    0.69
  -1  -2   1   36.29    0.67
   1  -2  -1   36.23    0.68
   1  -2  -1   36.32    0.68
  -1  -2   1   36.30    0.68
   1   2  -1   37.12    0.67
  -1   2   1   36.28    0.68
   1   2  -1   35.87    0.68
   1   2  -1   36.88    0.69
   1   2  -1   35.56    0.66
  -1   2   1   36.75    0.70
  -1   2   1   36.90    0.69
   0  -2   1    7.22    0.22
   0  -2  -1    7.47    0.18
   0  -2   1    7.63    0.18
   0   2   1    7.26    0.19
   0   2   1    7.22    0.21
   0   2  -1    7.44    0.19
  -1  -2  -1   13.86    0.28
   1  -2   1   13.69    0.28
   1  -2   1   13.70    0.29
  -1  -2  -1   13.93    0.29
  -1  -2  -1   13.27    0.30
   1  -2   1   13.55    0.30
  -1   2  -1   13.58    0.30
  -1   2  -1   13.71    0.28
   1   2   1   14.03    0.29
  -1   2  -1   13.36    0.29
   1   2   1   13.51    0.28
  -1   2  -1   13.37    0.30
  -2  -2  -1   19.53    0.40
   2  -2   1   20.06    0.44
  -2  -2  -1   19.96    0.41
   2  -2   1   20.09    0.42
   2  -2   1   19.71    0.40
  -2  -2  -1   20.15    0.41
   2  -2   1   20.14    0.41
  -2   2  -1   19.99    0.40
  -2   2  -1   19.88    0.42
   2   2   1   20.32    0.40
   2   2   1   19.73    0.41
  -2   2  -1   19.95    0.41
  -2   2  -1   19.64    0.44
   2   2   1   19.38    0.41
  -3  -2  -1   37.12    0.72
  -3  -2  -1   38.70    0.73
  -3  -2  -1   37.50    0.74
   3  -2   1   37.75    0.73
   3  -2   1   38.14    0.74
   3  -2   1   37.80    0.77
  -3   2  -1   38.19    0.73
  -3   2  -1   37.72    0.72
   3   2   1   37.30    0.75
   3   2   1   36.77    0.72
  -3   2  -1   37.61    0.74
   3   2   1   38.29    0.72
  -3   2  -1   37.34    0.78
   4  -2   1    2.02    0.16
   4  -2   1    2.00    0.16
  -4  -2  -1    1.65    0.16
   4  -2   1    1.96    0.20
  -4  -2  -1    1.72    0.14
  -4  -2  -1    1.97    0.17
   4   2   1    1.94    0.14
  -4   2  -1    1.83    0.16
  -4   2  -1    1.92    0.15
  -4   2  -1    1.89    0.17
   4   2   1    1.79    0.15
   4   2   1    1.67    0.19
  -4   2  -1    1.77    0.20
  -5  -2  -1    0.66    0.15
   5  -2   1    0.43    0.17
  -5  -2  -1    0.28    0.14
  -5  -2  -1    0.41    0.13
   5  -2   1    0.54    0.13
   5  -2   1    0.50    0.13
  -5   2  -1    0.29    0.16
   5   2   1    0.53    0.16
  -5   2  -1    0.43    0.13
  -5   2  -1    0.39    0.13
  -5   2  -1    0.78    0.15
  -6  -2  -1    9.45    0.29
  -6  -2  -1    9.70    0.30
  -6  -2  -1    9.53    0.34
   6  -2   1    9.66    0.39
  -6   2  -1    9.25    0.39
  -6   2  -1    9.65    0.30
   6   2   1    9.36    0.37
  -6   2  -1    9.39    0.30
  -6   2  -1    9.46    0.32
   7  -2   1    6.26    0.37
  -7  -2  -1    6.16    0.26
  -7  -2  -1    6.58    0.32
  -7   2  -1    6.36    0.27
  -7   2  -1    5.98    0.29
   7   2   1    6.35    0.36
  -7   2  -1    6.06    0.36
  -7   2  -1    6.20    0.27
   8  -2   1    0.35    0.26
  -8  -2  -1    0.38    0.15
  -8  -2  -1    0.39    0.20
  -8   2  -1    0.31    0.16
  -8   2  -1    0.61    0.23
  -8   2  -1    0.45    0.18
   8   2   1    0.37    0.24
  -9  -2  -1    2.14    0.33
   9  -2   1    1.98    0.32
  -9  -2  -1    1.71    0.21
  -9  -2  -1    1.59    0.19
  -9   2  -1    1.69    0.22
  -9   2  -1    1.83    0.29
  -9   2  -1    1.82    0.20
  -9   2  -1    2.14    0.23
  10  -2   1    4.71    0.46
 -10  -2  -1    4.30    0.31
 -10  -2  -1    4.66    0.34
 -10  -2  -1    4.42    0.39
 -10   2  -1    4.81    0.32
 -10   2  -1    4.17    0.46
 -10   2  -1    4.63    0.34
 -10   2  -1    4.74    0.34
  10   2   1    4.06    0.45
 -11  -2  -1    8.00    0.41
 -11  -2  -1    7.89    0.38
 -11  -2  -1    7.85    0.50
 -11   2  -1    8.11    0.41
 -11   2  -1    8.25    0.48
 -11   2  -1    7.77    0.52
 -11   2  -1    8.10    0.42
 -12  -2  -1    1.90    0.31
 -12  -2  -1    2.63    0.35
 -12  -2  -1    1.56    0.34
 -12   2  -1    1.63    0.26
 -12   2  -1    1.45    0.37
  12   2   1    2.31    0.37
 -12   2  -1    1.45    0.28
 -12   2  -1    1.97    0.30
 -13  -2  -1   11.71    0.62
 -13  -2  -1   12.37    0.50
 -13  -2  -1   11.98    0.52
 -13   2  -1   12.97    0.52
 -13   2  -1   11.00    0.54
 -13   2  -1   12.02    0.71
 -13   2  -1   11.61    0.51
 -14  -2  -1    0.36    0.39
 -14  -2  -1    0.48    0.32
 -14  -2  -1    0.82    0.42
  14   2   1   -0.17    0.51
 -14   2  -1    0.10    0.28
 -14   2  -1    0.72    0.31
 -14   2  -1    1.32    0.34
 -14   2  -1    1.38    0.37
 -15  -2  -1    0.56    0.34
 -15  -2  -1    0.43    0.38
 -15  -2  -1    0.26    0.39
 -15   2  -1    0.99    0.44
 -15   2  -1    0.09    0.37
 -15   2  -1    0.38    0.37
 -15   2  -1   -0.84    0.57
 -15  -3   1    0.41    0.38
 -15  -3   1    1.21    0.50
 -15  -3   1    0.96    0.52
 -15   3   1    1.07    0.52
 -15   3   1    0.81    0.36
 -15   3   1    1.91    0.38
 -15   3   1    0.35    0.40
 -14  -3   1    1.80    0.33
 -14  -3   1    1.18    0.53
 -14  -3   1    1.67    0.36
 -14   3   1    1.23    0.32
 -14   3   1    1.54    0.39
 -14   3   1    1.39    0.35
 -13  -3   1   -0.11    0.29
 -13  -3   1   -0.03    0.26
 -13  -3   1   -0.03    0.25
 -13  -3   1   -0.17    0.37
 -13   3   1    0.38    0.26
 -13   3   1    0.03    0.26
 -13   3   1   -0.77    0.44
 -13   3   1   -0.26    0.28
 -13   3   1   -0.28    0.35
 -12  -3   1   11.82    0.44
 -12  -3   1   11.16    0.65
 -12  -3   1   11.09    0.45
 -12  -3   1   11.40    0.60
  12   3  -1   11.27    0.60
 -12   3   1   10.09    0.64
 -12   3   1   11.61    0.63
 -12   3   1   12.42    0.44
 -12   3   1   12.36    0.49
 -11  -3   1    3.10    0.30
 -11  -3   1    3.22    0.41
 -11  -3   1    3.17    0.46
  11   3  -1    3.09    0.44
 -11   3   1    3.35    0.32
 -11   3   1    4.01    0.49
 -11   3   1    3.29    0.35
 -11   3   1    2.89    0.47
 -10  -3   1    7.05    0.42
 -10  -3   1    7.63    0.32
  10   3  -1    7.28    0.47
 -10   3   1    7.27    0.37
 -10   3   1    7.29    0.36
 -10   3   1    7.55    0.34
 -10   3   1    6.38    0.49
  -9  -3   1    1.19    0.17
  -9  -3   1    0.74    0.21
  -9  -3   1    0.99    0.18
  -9   3   1    1.06    0.20
  -9   3   1    1.22    0.19
  -9   3   1    0.98    0.27
  -9   3   1    1.08    0.19
  -8  -3   1    0.69    0.18
  -8  -3   1    0.73    0.16
  -8  -3   1    0.65    0.14
   8   3  -1    0.65    0.25
  -8   3   1    0.33    0.23
  -8   3   1    0.74    0.18
  -8   3   1    0.68    0.15
  -8   3   1    0.73    0.16
  -7  -3   1    7.97    0.26
  -7  -3   1    8.23    0.28
  -7  -3   1    8.37    0.33
  -7   3   1    8.51    0.30
  -7   3   1    8.22    0.40
   7   3  -1    8.44    0.37
  -7   3   1    8.18    0.27
  -7   3   1    8.35    0.28
  -6  -3   1    2.48    0.22
  -6  -3   1    1.96    0.17
  -6  -3   1    2.07    0.20
   6   3  -1    1.82    0.26
  -6   3   1    2.23    0.18
  -6   3   1    2.16    0.31
  -6   3   1    2.60    0.20
  -6   3   1    2.12    0.22
  -5  -3   1   12.89    0.33
  -5  -3   1   12.66    0.31
  -5  -3   1   13.40    0.35
  -5   3   1   13.56    0.43
  -5   3   1   12.89    0.31
  -5   3   1   13.42    0.33
  -5   3   1   13.25    0.35
   5   3  -1   13.14    0.38
  -4  -3   1   34.01    0.65
   4  -3  -1   33.39    0.66
  -4  -3   1   33.87    0.67
   4  -3  -1   33.66    0.65
  -4  -3   1   33.74    0.66
  -4   3   1   33.88    0.66
  -4   3   1   33.75    0.64
  -4   3   1   33.92    0.68
  -4   3   1   33.91    0.74
   4   3  -1   33.42    0.68
  -3  -3   1    7.31    0.20
   3  -3  -1    7.53    0.21
  -3  -3   1    7.44    0.20
  -3  -3   1    7.79    0.20
   3  -3  -1    7.42    0.22
  -3  -3   1    7.60    0.22
  -3   3   1    7.51    0.21
   3   3  -1    7.69    0.19
   3   3  -1    7.56    0.20
   3   3  -1    7.78    0.21
  -3   3   1    7.33    0.23
  -2  -3   1   16.72    0.33
  -2  -3   1   15.96    0.38
  -2  -3   1   16.40    0.34
   2  -3  -1   15.95    0.37
   2  -3  -1   16.11    0.35
  -2  -3   1   15.86    0.36
   2   3  -1   16.14    0.34
  -2   3   1   16.29    0.37
  -2   3   1   16.52    0.35
   2   3  -1   15.71    0.35
   2   3  -1   16.08    0.33
  -1  -3   1  178.53    3.22
  -1  -3   1  173.49    3.21
  -1  -3   1  182.04    3.22
   1  -3  -1  172.96    3.21
   1  -3  -1  179.60    3.22
   1  -3  -1  180.73    3.19
  -1   3   1  178.66    3.23
   1   3  -1  178.03    3.22
   1   3  -1  176.68    3.20
   1   3  -1  176.51    3.21
  -1   3   1  179.25    3.21
  -1   3   1  180.31    3.22
   0  -3  -1    6.51    0.19
   0  -3   1    6.91    0.22
   0  -3  -1    7.11    0.22
   0  -3  -1    7.05    0.20
   0   3   1    6.64    0.18
   0   3  -1    7.06    0.22
   0   3   1    6.95    0.19
   0   3   1    6.85    0.22
   1  -3   1    0.08    0.09
  -1  -3  -1    0.00    0.06
  -1  -3  -1   -0.08    0.11
   1  -3   1    0.16    0.08
   1  -3   1    0.09    0.12
  -1  -3  -1    0.00    0.09
  -1   3  -1    0.23    0.09
  -1   3  -1    0.07    0.11
   1   3   1    0.00    0.09
  -1   3  -1    0.16    0.09
   1   3   1   -0.01    0.11
   1   3   1    0.05    0.08
  -2  -3  -1    0.93    0.14
   2  -3   1    0.99    0.12
  -2  -3  -1    1.04    0.13
  -2  -3  -1    0.80    0.13
   2  -3   1    0.95    0.14
   2  -3   1    1.14    0.12
   2   3   1    0.98    0.12
   2   3   1    1.11    0.14
  -2   3  -1    1.10    0.15
  -2   3  -1    0.83    0.13
   2   3   1    1.09    0.10
  -2   3  -1    1.38    0.12
  -2   3  -1    0.88    0.13
   3  -3   1    1.63    0.15
  -3  -3  -1    1.59    0.16
  -3  -3  -1    1.65    0.13
  -3  -3  -1    1.48    0.13
   3  -3   1    1.58    0.16
   3  -3   1    1.55    0.13
   3   3   1    1.63    0.15
  -3   3  -1    1.62    0.19
  -3   3  -1    1.62    0.15
   3   3   1    1.47    0.13
  -3   3  -1    1.55    0.17
  -3   3  -1    1.60    0.12
   3   3   1    1.56    0.16
  -4  -3  -1  123.97    2.24
   4  -3   1  124.47    2.25
  -4  -3  -1  123.15    2.25
  -4  -3  -1  120.71    2.26
   4  -3   1  123.36    2.25
  -4   3  -1  125.24    2.31
   4   3   1  120.47    2.27
   4   3   1  122.04    2.24
  -4   3  -1  122.49    2.24
  -4   3  -1  123.88    2.26
  -4   3  -1  120.03    2.25
   4   3   1  123.15    2.24
   5  -3   1   60.91    1.15
  -5  -3  -1   59.78    1.15
   5  -3   1   61.15    1.16
  -5  -3  -1   59.68    1.16
  -5  -3  -1   61.29    1.19
   5  -3   1   62.32    1.24
   5   3   1   60.29    1.14
  -5   3  -1   60.10    1.18
   5   3   1   62.10    1.21
   5   3   1   60.69    1.14
  -5   3  -1   59.81    1.24
  -5   3  -1   59.78    1.16
  -5   3  -1   61.10    1.15
   6  -3   1    1.17    0.15
  -6  -3  -1    0.92    0.14
   6  -3   1    1.11    0.15
   6  -3   1    0.92    0.20
  -6  -3  -1    0.95    0.16
  -6  -3  -1    1.11    0.17
  -6   3  -1    0.98    0.17
  -6   3  -1    0.87    0.21
  -6   3  -1    0.97    0.14
  -6   3  -1    1.26    0.15
   6   3   1    1.23    0.19
  -7  -3  -1   -0.02    0.14
   7  -3   1   -0.06    0.14
  -7  -3  -1    0.02    0.16
  -7  -3  -1   -0.15    0.13
  -7   3  -1    0.05    0.20
  -7   3  -1    0.08    0.14
  -7   3  -1   -0.06    0.14
  -7   3  -1   -0.06    0.16
   7   3   1   -0.10    0.19
  -8  -3  -1    9.89    0.33
  -8  -3  -1    9.67    0.40
  -8  -3  -1    9.67    0.35
  -8   3  -1    9.37    0.37
  -8   3  -1    9.75    0.35
   8   3   1    9.80    0.44
  -8   3  -1    9.76    0.35
  -8   3  -1    9.53    0.46
  -9  -3  -1    0.65    0.18
  -9  -3  -1    0.79    0.24
  -9   3  -1    0.69    0.20
  -9   3  -1    0.80    0.19
  -9   3  -1    0.65    0.26
  -9   3  -1    0.65    0.20
   9   3   1    0.69    0.43
 -10  -3  -1    7.68    0.44
 -10  -3  -1    7.20    0.38
 -10  -3  -1    7.19    0.35
 -10   3  -1    7.77    0.76
 -10   3  -1    7.66    0.39
 -10   3  -1    6.87    0.39
 -10   3  -1    6.69    0.56
 -11  -3  -1    3.12    0.34
 -11  -3  -1    3.08    0.40
  11   3   1    3.48    0.46
 -11   3  -1    2.94    0.44
 -11   3  -1    3.32    0.43
 -11   3  -1    3.32    0.38
 -11   3  -1    3.66    0.51
 -12  -3  -1    5.19    0.39
 -12  -3  -1    4.20    0.46
 -12   3  -1    4.80    0.40
 -12   3  -1    4.21    0.53
 -12   3  -1    3.47    0.43
 -12   3  -1    4.49    0.39
  12   3   1    4.33    0.53
 -13  -3  -1   -0.24    0.29
 -13  -3  -1    0.67    0.27
 -13  -3  -1   -0.29    0.32
  13   3   1    0.35    0.35
 -13   3  -1    0.19    0.27
 -13   3  -1   -0.05    0.31
 -13   3  -1    0.37    0.27
 -13   3  -1   -0.23    0.39
 -14  -3  -1    5.32    0.56
 -14  -3  -1    4.69    0.49
  14   3   1    3.29    0.48
 -14   3  -1    4.84    0.49
 -14   3  -1    4.84    0.52
 -14   3  -1    4.62    0.71
 -14   3  -1    5.14    0.49
 -15  -3  -1    0.56    0.40
 -15  -3  -1    0.05    0.38
 -15  -3  -1    0.06    0.65
 -15  -3  -1    0.46    0.35
 -15   3  -1    1.04    0.44
 -15   3  -1    0.13    0.40
 -15  -4   1    7.13    0.81
 -15  -4   1    6.09    0.61
 -15   4   1    5.81    0.68
 -15   4   1    6.63    0.60
 -15   4   1    5.27    0.78
 -14  -4   1    3.08    0.47
 -14  -4   1    2.94    0.47
 -14  -4   1    3.14    0.43
 -14  -4   1    2.06    0.34
 -14   4   1    1.53    0.33
 -14   4   1    2.43    0.50
 -14   4   1    2.05    0.36
 -14   4   1    3.55    0.44
 -13  -4   1    4.58    0.40
 -13  -4   1    3.74    0.47
 -13  -4   1    4.10    0.48
 -13   4   1    3.53    0.41
 -13   4   1    4.26    0.62
 -13   4   1    4.87    0.82
 -13   4   1    4.23    0.41
 -12  -4   1    0.53    0.23
 -12  -4   1   -0.01    0.35
  12   4  -1    0.05    0.32
 -12   4   1    0.37    0.25
 -12   4   1    0.43    0.28
 -12   4   1    0.13    0.34
 -12   4   1    0.66    0.23
 -11  -4   1    1.82    0.22
 -11  -4   1    0.88    0.30
 -11  -4   1    1.41    0.27
 -11   4   1    1.06    0.27
 -11   4   1    1.48    0.35
 -11   4   1    1.45    0.23
  11   4  -1    1.16    0.34
 -11   4   1    1.05    0.25
 -10  -4   1    4.58    0.30
 -10  -4   1    4.54    0.33
 -10  -4   1    4.81    0.37
 -10  -4   1    4.60    0.51
 -10   4   1    4.95    0.36
 -10   4   1    4.58    0.32
  10   4  -1    4.67    0.53
 -10   4   1    4.74    0.31
 -10   4   1    3.96    0.68
  -9  -4   1   -0.05    0.16
  -9  -4   1   -0.14    0.18
  -9  -4   1   -0.08    0.18
  -9   4   1    0.09    0.20
  -9   4   1    0.06    0.25
  -9   4   1    0.04    0.18
   9   4  -1    0.03    0.31
  -9   4   1    0.14    0.16
  -8  -4   1    7.50    0.34
  -8  -4   1    7.65    0.31
  -8  -4   1    7.88    0.29
  -8   4   1    7.91    0.28
  -8   4   1    8.16    0.46
  -8   4   1    8.37    0.34
  -8   4   1    8.02    0.31
   8   4  -1    7.70    0.54
  -7  -4   1    0.18    0.15
  -7  -4   1    0.44    0.15
  -7  -4   1   -0.05    0.12
  -7   4   1    0.10    0.12
   7   4  -1    0.12    0.19
  -7   4   1   -0.14    0.16
  -7   4   1    0.20    0.14
  -7   4   1    0.38    0.23
  -6  -4   1    1.67    0.20
  -6  -4   1    1.18    0.18
  -6  -4   1    1.21    0.15
  -6   4   1    1.65    0.20
  -6   4   1    1.69    0.24
   6   4  -1    1.80    0.20
  -6   4   1    1.16    0.16
  -6   4   1    1.51    0.18
   5  -4  -1   71.59    1.34
  -5  -4   1   72.04    1.35
   5  -4  -1   71.42    1.34
  -5  -4   1   71.64    1.34
  -5  -4   1   71.32    1.36
  -5   4   1   70.16    1.44
  -5   4   1   71.42    1.37
  -5   4   1   70.93    1.35
  -5   4   1   72.62    1.32
   5   4  -1   71.50    1.37
  -4  -4   1   20.88    0.48
   4  -4  -1   21.44    0.48
  -4  -4   1   21.80    0.46
  -4  -4   1   20.99    0.45
   4  -4  -1   21.42    0.47
  -4  -4   1   21.80    0.46
  -4   4   1   21.29    0.50
   4   4  -1   21.56    0.48
  -4   4   1   21.31    0.42
  -4   4   1   21.13    0.47
   4   4  -1   20.72    0.44
   3  -4  -1    5.67    0.21
  -3  -4   1    5.70    0.16
   3  -4  -1    5.59    0.23
  -3  -4   1    5.94    0.23
  -3  -4   1    5.93    0.20
  -3  -4   1    6.22    0.18
   3  -4  -1    5.80    0.16
  -3   4   1    6.15    0.16
  -3   4   1    5.72    0.21
   3   4  -1    6.13    0.21
   3   4  -1    6.22    0.19
  -3   4   1    5.87    0.24
   3   4  -1    6.02    0.19
  -2  -4   1   55.89    1.07
   2  -4  -1   55.34    1.06
   2  -4  -1   56.04    1.07
  -2  -4   1   56.85    1.06
   2  -4  -1   58.00    1.03
  -2  -4   1   56.40    1.09
  -2   4   1   56.60    1.08
   2   4  -1   55.23    1.06
  -2   4   1   56.42    1.03
   2   4  -1   55.87    1.04
   2   4  -1   56.04    1.05
  -2   4   1   57.00    1.06
  -1  -4   1   12.18    0.31
  -1  -4   1   12.05    0.32
   1  -4  -1   11.44    0.29
   1  -4  -1   12.16    0.27
   1  -4  -1   11.82    0.32
  -1   4   1   11.71    0.31
  -1   4   1   11.74    0.32
   1   4  -1   11.93    0.29
  -1   4   1   12.01    0.29
   1   4  -1   11.83    0.31
   0  -4   1    1.79    0.19
   0  -4  -1    1.47    0.15
   0  -4   1    1.35    0.15
   0  -4  -1    1.59    0.18
   0  -4  -1    1.57    0.15
   0  -4   1    1.87    0.15
   0   4   1    1.57    0.13
   0   4  -1    1.30    0.19
   0   4   1    1.69    0.18
   0   4  -1    1.60    0.15
   0   4   1    1.44    0.15
   0   4  -1    1.41    0.15
  -1  -4  -1   18.40    0.42
   1  -4   1   17.96    0.40
   1  -4   1   18.78    0.39
   1  -4   1   18.37    0.43
  -1  -4  -1   18.32    0.40
   1   4   1   18.47    0.40
   1   4   1   18.33    0.42
  -1   4  -1   18.81    0.39
  -1   4  -1   18.16    0.43
   1   4   1   18.76    0.36
  -2  -4  -1    5.35    0.19
   2  -4   1    5.54    0.22
   2  -4   1    5.59    0.17
  -2  -4  -1    5.43    0.22
   2  -4   1    5.65    0.21
  -2   4  -1    5.58    0.17
   2   4   1    5.57    0.22
  -2   4  -1    5.60    0.23
   2   4   1    5.77    0.19
  -2   4  -1    5.54    0.20
  -2   4  -1    5.49    0.22
   2   4   1    5.40    0.19
   3  -4   1   11.90    0.32
  -3  -4  -1   12.05    0.33
  -3  -4  -1   12.60    0.30
   3  -4   1   12.14    0.34
   3  -4   1   12.28    0.29
  -3  -4  -1   11.93    0.30
   3   4   1   12.42    0.31
  -3   4  -1   12.03    0.34
   3   4   1   11.94    0.32
   3   4   1   12.51    0.30
  -3   4  -1   12.35    0.28
  -3   4  -1   11.94    0.36
  -3   4  -1   11.60    0.31
  -4  -4  -1    5.84    0.23
   4  -4   1    6.36    0.28
  -4  -4  -1    5.83    0.24
  -4  -4  -1    5.51    0.27
   4  -4   1    5.81    0.22
   4  -4   1    6.37    0.26
  -4   4  -1    5.98    0.32
  -4   4  -1    6.18    0.25
   4   4   1    5.66    0.25
   4   4   1    6.12    0.23
  -4   4  -1    5.93    0.21
   4   4   1    5.98    0.26
  -4   4  -1    6.12    0.28
  -5  -4  -1    0.10    0.13
   5  -4   1    0.28    0.15
   5  -4   1    0.15    0.16
  -5  -4  -1    0.00    0.13
  -5  -4  -1    0.23    0.16
  -5   4  -1    0.24    0.17
  -5   4  -1   -0.01    0.14
   5   4   1   -0.29    0.15
   5   4   1    0.17    0.14
   5   4   1    0.03    0.13
  -5   4  -1    0.11    0.12
  -6  -4  -1    5.55    0.25
  -6  -4  -1    6.13    0.28
  -6  -4  -1    6.17    0.27
   6  -4   1    5.56    0.26
   6  -4   1    5.93    0.27
  -6   4  -1    6.23    0.36
  -6   4  -1    6.07    0.27
   6   4   1    5.56    0.31
  -6   4  -1    5.83    0.23
  -6   4  -1    5.96    0.30
  -7  -4  -1    1.39    0.17
  -7  -4  -1    1.26    0.19
  -7  -4  -1    1.43    0.23
   7  -4   1    1.46    0.18
   7  -4   1    1.51    0.18
  -7   4  -1    1.45    0.25
  -7   4  -1    1.42    0.20
   7   4   1    1.45    0.23
  -7   4  -1    1.57    0.23
  -7   4  -1    1.38    0.16
  -8  -4  -1    5.19    0.32
  -8  -4  -1    4.62    0.28
  -8  -4  -1    4.97    0.31
  -8   4  -1    5.06    0.31
  -8   4  -1    4.69    0.27
  -8   4  -1    4.62    0.41
   8   4   1    5.31    0.38
  -8   4  -1    4.78    0.33
  -9  -4  -1    5.05    0.34
  -9  -4  -1    5.04    0.36
  -9  -4  -1    4.79    0.30
  -9   4  -1    5.90    0.34
  -9   4  -1    5.54    0.31
  -9   4  -1    5.41    0.46
  -9   4  -1    5.14    0.37
 -10  -4  -1    0.82    0.22
 -10  -4  -1    1.57    0.27
 -10   4  -1    0.87    0.25
 -10   4  -1    0.96    0.22
  10   4   1    0.97    0.29
 -10   4  -1    0.90    0.31
 -10   4  -1    1.09    0.23
 -11  -4  -1   -0.14    0.26
 -11  -4  -1    0.13    0.24
 -11  -4  -1    0.26    0.22
 -11   4  -1    0.21    0.25
 -11   4  -1    0.21    0.23
  11   4   1    0.01    0.32
 -11   4  -1    0.16    0.24
 -11   4  -1    0.12    0.31
 -12  -4  -1    1.96    0.29
 -12  -4  -1    1.90    0.34
 -12  -4  -1    2.78    0.38
 -12   4  -1    2.60    0.33
 -12   4  -1    2.55    0.36
 -12   4  -1    2.60    0.43
 -12   4  -1    2.45    0.31
  12   4   1    1.86    0.40
 -13  -4  -1    3.85    0.45
 -13  -4  -1    3.69    0.50
 -13   4  -1    4.16    0.41
 -13   4  -1    3.88    0.43
 -13   4  -1    3.79    0.56
 -13   4  -1    4.11    0.61
 -14  -4  -1    0.81    0.34
 -14  -4  -1    0.64    0.36
 -14  -4  -1    0.75    0.48
 -14  -4  -1    1.03    0.32
  14   4   1    0.20    0.52
 -14   4  -1    0.29    0.35
 -14   4  -1    0.89    0.36
 -14   4  -1    0.74    0.32
 -14   4  -1   -0.08    0.49
 -15  -4  -1    2.12    0.61
 -15  -4  -1    1.89    0.44
 -15  -4  -1    4.26    0.66
 -15   4  -1    3.07    0.42
 -15   4  -1    3.32    0.47
 -15   4  -1    3.17    0.60
 -14  -5   1    1.86    0.37
 -14  -5   1    3.53    0.63
 -14  -5   1    2.50    0.42
 -14  -5   1    2.95    0.44
 -14   5   1    1.59    0.57
  14   5  -1    1.80    0.50
 -14   5   1    2.69    0.32
 -14   5   1    2.07    0.38
 -13  -5   1    0.50    0.35
 -13  -5   1    0.75    0.30
 -13  -5   1    1.22    0.28
 -13   5   1    0.26    0.44
 -13   5   1    0.98    0.56
  13   5  -1    0.78    0.41
 -13   5   1    0.85    0.28
 -12  -5   1    0.28    0.32
 -12  -5   1   -0.03    0.22
 -12  -5   1    0.33    0.35
 -12   5   1    0.19    0.37
 -12   5   1    0.11    0.46
 -12   5   1    0.23    0.24
 -12   5   1   -0.03    0.31
  12   5  -1    0.31    0.31
 -12   5   1    0.09    0.38
 -11  -5   1    3.01    0.55
 -11  -5   1    2.50    0.37
 -11  -5   1    2.79    0.32
 -11  -5   1    2.86    0.35
 -11   5   1    2.94    0.41
 -11   5   1    3.09    0.35
  11   5  -1    2.92    0.45
 -11   5   1    3.30    0.53
 -11   5   1    3.52    0.31
 -10  -5   1    6.64    0.46
 -10  -5   1    6.32    0.38
 -10  -5   1    6.53    0.38
 -10  -5   1    6.99    0.34
 -10   5   1    6.90    0.44
 -10   5   1    6.84    0.41
  10   5  -1    5.09    0.76
 -10   5   1    6.83    0.55
 -10   5   1    6.81    0.32
  -9  -5   1    1.15    0.21
  -9  -5   1    1.63    0.23
  -9  -5   1    1.00    0.25
  -9  -5   1    1.35    0.20
   9   5  -1    1.42    0.30
  -9   5   1    1.43    0.23
  -9   5   1    1.24    0.30
  -9   5   1    1.27    0.22
  -9   5   1    1.42    0.18
  -8  -5   1   10.74    0.38
  -8  -5   1   10.78    0.37
  -8  -5   1   10.79    0.41
  -8  -5   1   11.08    0.35
  -8   5   1   10.56    0.38
  -8   5   1   10.71    0.32
   8   5  -1   11.05    0.45
  -8   5   1   11.10    0.41
  -8   5   1   10.51    0.50
  -7  -5   1   -0.14    0.16
  -7  -5   1   -0.16    0.17
  -7  -5   1    0.20    0.14
  -7  -5   1    0.20    0.14
  -7   5   1    0.29    0.12
  -7   5   1    0.54    0.16
  -7   5   1    0.40    0.22
  -7   5   1    0.27    0.18
   7   5  -1    0.01    0.20
  -6  -5   1   16.26    0.40
  -6  -5   1   15.99    0.43
   6  -5  -1   16.42    0.41
  -6  -5   1   15.93    0.42
  -6  -5   1   16.69    0.41
  -6   5   1   16.05    0.42
  -6   5   1   16.37    0.46
  -6   5   1   16.93    0.37
  -6   5   1   16.01    0.53
   6   5  -1   16.47    0.45
   5  -5  -1    9.02    0.30
  -5  -5   1    8.99    0.27
  -5  -5   1    9.10    0.27
   5  -5  -1    9.04    0.31
  -5  -5   1    9.06    0.31
  -5  -5   1    9.19    0.28
  -5   5   1    9.19    0.30
  -5   5   1    9.08    0.39
   5   5  -1    9.42    0.31
  -5   5   1    9.02    0.33
  -5   5   1    9.31    0.24
   4  -5  -1    0.22    0.16
  -4  -5   1    0.33    0.13
   4  -5  -1    0.25    0.14
   4  -5  -1    0.17    0.10
  -4  -5   1    0.44    0.11
  -4  -5   1    0.20    0.09
  -4  -5   1    0.27    0.15
   4   5  -1    0.25    0.13
   4   5  -1    0.48    0.14
  -4   5   1    0.21    0.17
  -4   5   1    0.29    0.14
   4   5  -1    0.40    0.12
  -3  -5   1   -0.08    0.16
   3  -5  -1    0.14    0.16
   3  -5  -1    0.21    0.14
  -3  -5   1   -0.08    0.13
   3  -5  -1    0.12    0.09
  -3  -5   1    0.03    0.15
  -3   5   1    0.08    0.15
   3   5  -1    0.25    0.10
   3   5  -1   -0.07    0.12
  -3   5   1    0.34    0.09
   3   5  -1    0.04    0.14
  -3   5   1    0.25    0.13
   2  -5  -1    6.38    0.23
  -2  -5   1    6.21    0.22
  -2  -5   1    6.43    0.26
  -2  -5   1    6.15    0.25
   2  -5  -1    6.53    0.18
   2  -5  -1    6.19    0.26
   2   5  -1    6.58    0.19
  -2   5   1    6.23    0.23
  -2   5   1    6.45    0.19
   2   5  -1    6.42    0.21
  -2   5   1    6.16    0.26
   2   5  -1    6.29    0.25
   1  -5  -1    7.04    0.20
   1  -5  -1    6.49    0.25
  -1  -5   1    6.61    0.25
   1  -5  -1    6.68    0.22
  -1  -5   1    6.78    0.23
  -1  -5   1    6.72    0.22
  -1   5   1    6.71    0.23
   1   5  -1    6.97    0.22
  -1   5   1    6.51    0.25
   1   5  -1    6.63    0.25
  -1   5   1    6.71    0.24
   0  -5   1    0.53    0.13
   0  -5   1    0.46    0.10
   0  -5  -1    0.50    0.11
   0  -5  -1    0.56    0.13
   0  -5  -1    0.45    0.10
   0  -5   1    0.48    0.11
   0   5  -1    0.56    0.11
   0   5   1    0.49    0.11
   0   5   1    0.45    0.13
   0   5  -1    0.48    0.10
   0   5   1    0.46    0.09
   0   5  -1    0.40    0.13
  -1  -5  -1   43.00    0.86
   1  -5   1   42.19    0.84
   1  -5   1   42.73    0.86
   1  -5   1   43.52    0.83
  -1  -5  -1   42.38    0.83
   1   5   1   41.93    0.79
  -1   5  -1   43.12    0.83
   1   5   1   42.60    0.85
  -1   5  -1   42.90    0.84
  -1   5  -1   42.05    0.86
   1   5   1   43.58    0.84
   2  -5   1    0.80    0.15
   2  -5   1    0.97    0.13
   2  -5   1    0.93    0.11
  -2  -5  -1    0.80    0.14
  -2  -5  -1    0.90    0.12
  -2   5  -1    0.90    0.14
   2   5   1    0.82    0.15
  -2   5  -1    0.87    0.15
   2   5   1    1.11    0.15
  -2   5  -1    0.74    0.13
   2   5   1    0.87    0.12
   3  -5   1    2.16    0.25
  -3  -5  -1    2.23    0.17
  -3  -5  -1    1.99    0.19
  -3  -5  -1    1.73    0.23
   3  -5   1    1.93    0.17
   3  -5   1    2.60    0.22
  -3   5  -1    1.97    0.21
   3   5   1    1.96    0.24
   3   5   1    2.14    0.20
  -3   5  -1    2.21    0.26
   3   5   1    2.22    0.19
  -3   5  -1    2.25    0.17
  -3   5  -1    1.92    0.25
   4  -5   1    0.08    0.17
   4  -5   1    0.04    0.12
   4  -5   1    0.20    0.16
  -4  -5  -1    0.02    0.16
  -4  -5  -1    0.01    0.13
  -4  -5  -1    0.05    0.12
   4   5   1    0.08    0.14
  -4   5  -1   -0.04    0.17
  -4   5  -1    0.29    0.12
   4   5   1    0.17    0.15
  -4   5  -1    0.02    0.19
  -4   5  -1    0.10    0.14
   4   5   1    0.05    0.13
   5  -5   1   19.81    0.48
   5  -5   1   20.12    0.49
  -5  -5  -1   19.59    0.47
   5  -5   1   19.74    0.45
  -5  -5  -1   19.79    0.49
  -5  -5  -1   19.79    0.47
  -5   5  -1   20.08    0.44
   5   5   1   19.69    0.47
   5   5   1   19.55    0.45
  -5   5  -1   19.74    0.48
   5   5   1   19.76    0.50
  -5   5  -1   19.80    0.56
  -5   5  -1   19.80    0.51
  -6  -5  -1    1.68    0.21
  -6  -5  -1    1.62    0.17
   6  -5   1    1.88    0.26
  -6  -5  -1    1.74    0.20
   6  -5   1    1.84    0.24
  -6   5  -1    1.88    0.18
  -6   5  -1    2.03    0.22
   6   5   1    1.93    0.21
   6   5   1    1.55    0.22
  -6   5  -1    1.57    0.23
   6   5   1    1.75    0.27
  -6   5  -1    1.93    0.24
   7  -5   1   10.00    0.35
  -7  -5  -1    9.52    0.33
  -7  -5  -1    9.75    0.37
   7  -5   1    9.74    0.35
  -7  -5  -1    9.78    0.35
   7   5   1    9.63    0.41
  -7   5  -1    9.56    0.45
  -7   5  -1   10.25    0.36
  -7   5  -1   10.14    0.31
  -7   5  -1    9.47    0.39
  -8  -5  -1    0.14    0.21
  -8  -5  -1    0.38    0.18
   8  -5   1    0.25    0.19
   8  -5   1    0.45    0.18
  -8  -5  -1    0.10    0.17
  -8   5  -1    0.34    0.19
  -8   5  -1   -0.04    0.16
  -8   5  -1    0.22    0.22
  -8   5  -1    0.28    0.26
  -9  -5  -1   -0.18    0.20
  -9  -5  -1    0.06    0.20
  -9  -5  -1   -0.16    0.22
  -9   5  -1   -0.07    0.22
  -9   5  -1   -0.14    0.28
  -9   5  -1   -0.21    0.21
  -9   5  -1    0.01    0.17
   9   5   1    0.14    0.32
 -10  -5  -1    2.33    0.33
 -10  -5  -1    2.10    0.34
 -10   5  -1    2.23    0.26
 -10   5  -1    2.44    0.38
 -10   5  -1    2.44    0.30
  10   5   1    2.42    0.33
 -10   5  -1    2.60    0.30
 -11  -5  -1    1.60    0.27
 -11  -5  -1    1.91    0.25
 -11   5  -1    1.93    0.31
  11   5   1    2.21    0.51
 -11   5  -1    2.12    0.28
 -11   5  -1    2.16    0.26
 -11   5  -1    1.76    0.38
 -12  -5  -1    3.65    0.44
 -12  -5  -1    5.05    0.43
 -12  -5  -1    4.17    0.41
 -12   5  -1    3.19    0.41
 -12   5  -1    4.08    0.60
 -12   5  -1    3.84    0.59
  12   5   1    4.14    0.57
 -12   5  -1    4.12    0.36
 -13  -5  -1    4.85    0.55
 -13  -5  -1    3.94    0.48
 -13  -5  -1    4.06    0.48
 -13   5  -1    5.44    0.44
 -13   5  -1    5.24    0.68
 -13   5  -1    4.52    0.52
 -13   5  -1    4.76    0.45
 -14  -5  -1    1.26    0.39
 -14  -5  -1    0.48    0.38
 -14  -5  -1    0.36    0.45
 -14   5  -1    1.05    0.32
 -14   5  -1    0.54    0.41
 -14   5  -1    1.62    0.42
  14   5   1    0.51    0.47
 -14   5  -1    0.62    0.36
 -14  -6   1    3.72    0.64
 -14  -6   1    3.62    0.51
 -14  -6   1    2.60    0.39
 -14  -6   1    3.63    0.54
 -14   6   1    3.46    0.53
 -14   6   1    2.27    0.54
 -13  -6   1    0.55    0.28
 -13  -6   1    0.12    0.28
 -13  -6   1    0.40    0.35
 -13   6   1   -0.50    0.33
  13   6  -1    0.10    0.42
 -13   6   1    0.50    0.32
 -13   6   1    0.19    0.26
 -13   6   1    0.86    0.39
 -12  -6   1    2.14    0.31
 -12  -6   1    1.91    0.27
 -12  -6   1    1.97    0.30
 -12  -6   1    2.04    0.32
 -12   6   1    2.17    0.25
 -12   6   1    1.74    0.37
  12   6  -1    1.37    0.36
 -12   6   1    2.16    0.43
 -12   6   1    1.80    0.31
 -11  -6   1    3.69    0.34
 -11  -6   1    3.18    0.37
 -11  -6   1    3.42    0.43
 -11  -6   1    3.18    0.37
 -11   6   1    3.51    0.41
  11   6  -1    2.91    0.35
 -11   6   1    3.48    0.30
 -11   6   1    3.28    0.40
 -11   6   1    3.23    0.43
 -10  -6   1    1.44    0.31
 -10  -6   1    1.34    0.26
 -10  -6   1    1.24    0.22
 -10  -6   1    1.08    0.21
 -10   6   1    1.54    0.19
 -10   6   1    1.35    0.28
 -10   6   1    0.91    0.32
 -10   6   1    1.25    0.27
  -9  -6   1    0.98    0.20
  -9  -6   1    1.37    0.23
  -9  -6   1    0.88    0.24
  -9  -6   1    1.14    0.23
  -9   6   1    1.34    0.27
  -9   6   1    0.75    0.23
   9   6  -1    1.31    0.29
  -9   6   1    1.18    0.17
  -8  -6   1   15.88    0.48
  -8  -6   1   16.00    0.46
  -8  -6   1   16.03    0.48
  -8  -6   1   15.54    0.44
  -8   6   1   15.69    0.51
  -8   6   1   16.56    0.64
  -8   6   1   16.17    0.40
   8   6  -1   15.85    0.53
  -8   6   1   15.69    0.49
   7  -6  -1    1.81    0.25
  -7  -6   1    1.77    0.24
  -7  -6   1    1.97    0.22
  -7  -6   1    1.90    0.23
  -7  -6   1    1.61    0.19
   7  -6  -1    1.81    0.25
  -7   6   1    1.98    0.21
  -7   6   1    1.98    0.30
   7   6  -1    2.02    0.31
  -7   6   1    1.96    0.18
  -7   6   1    2.18    0.24
  -6  -6   1    7.35    0.28
  -6  -6   1    7.30    0.32
  -6  -6   1    7.51    0.27
   6  -6  -1    7.43    0.29
  -6  -6   1    6.97    0.26
  -6   6   1    7.74    0.23
   6   6  -1    7.67    0.32
  -6   6   1    7.83    0.31
  -6   6   1    7.87    0.41
  -6   6   1    7.50    0.35
  -5  -6   1    0.72    0.10
  -5  -6   1    0.91    0.15
   5  -6  -1    1.04    0.17
  -5  -6   1    0.86    0.18
   5  -6  -1    1.06    0.18
  -5  -6   1    1.13    0.17
   5   6  -1    1.13    0.16
  -5   6   1    1.15    0.19
  -5   6   1    0.99    0.16
  -5   6   1    0.96    0.21
  -5   6   1    0.98    0.15
   5   6  -1    0.93    0.16
   5   6  -1    0.96    0.20
   4  -6  -1    6.62    0.27
   4  -6  -1    6.10    0.30
   4  -6  -1    6.06    0.20
  -4  -6   1    6.34    0.30
  -4  -6   1    6.19    0.26
  -4  -6   1    6.17    0.32
  -4   6   1    6.52    0.20
  -4   6   1    6.27    0.31
   4   6  -1    6.31    0.25
  -4   6   1    6.30    0.28
   4   6  -1    6.16    0.24
   4   6  -1    6.18    0.27
   3  -6  -1    7.55    0.32
  -3  -6   1    7.49    0.32
   3  -6  -1    7.85    0.23
  -3  -6   1    7.52    0.28
   3  -6  -1    7.69    0.29
  -3  -6   1    8.12    0.33
   3   6  -1    7.98    0.24
  -3   6   1    7.97    0.34
  -3   6   1    7.50    0.30
  -3   6   1    7.91    0.23
   3   6  -1    7.74    0.27
   3   6  -1    7.64    0.31
   2  -6  -1    1.19    0.16
   2  -6  -1    1.21    0.19
   2  -6  -1    1.25    0.16
  -2  -6   1    0.89    0.15
  -2  -6   1    1.08    0.18
  -2  -6   1    0.94    0.17
  -2   6   1    0.97    0.13
  -2   6   1    1.26    0.19
   2   6  -1    1.08    0.18
  -2   6   1    1.32    0.16
  -2   6   1    0.93    0.18
   2   6  -1    0.94    0.15
   2   6  -1    1.22    0.15
   1  -6  -1    3.83    0.27
   1  -6  -1    4.22    0.20
   1  -6  -1    3.90    0.23
  -1  -6   1    3.70    0.28
  -1  -6   1    3.71    0.23
  -1  -6   1    4.01    0.24
   1   6  -1    3.52    0.27
   1   6  -1    3.87    0.22
  -1   6   1    4.08    0.24
  -1   6   1    4.01    0.24
  -1   6   1    4.00    0.28
   0  -6  -1    8.49    0.33
   0  -6  -1    9.06    0.28
   0  -6  -1    8.57    0.29
   0  -6   1    8.03    0.32
   0  -6   1    8.46    0.28
   0   6   1    8.67    0.28
   0   6   1    8.42    0.32
   0   6  -1    8.35    0.29
   0   6  -1    8.39    0.32
   0   6  -1    8.57    0.29
   0   6   1    8.32    0.25
   1  -6   1   10.08    0.35
   1  -6   1    9.50    0.32
  -1  -6  -1   10.23    0.34
   1  -6   1    9.62    0.29
  -1  -6  -1    9.75    0.31
  -1  -6  -1    9.70    0.32
   1   6   1    9.56    0.23
  -1   6  -1    9.93    0.35
  -1   6  -1   10.02    0.30
   1   6   1    9.58    0.30
  -1   6  -1    9.67    0.31
   1   6   1    9.59    0.35
   2  -6   1    1.50    0.20
  -2  -6  -1    1.43    0.19
   2  -6   1    1.56    0.18
  -2  -6  -1    1.42    0.21
   2  -6   1    1.37    0.21
   2   6   1    1.70    0.18
   2   6   1    1.31    0.19
   2   6   1    1.46    0.16
  -2   6  -1    1.76    0.19
  -2   6  -1    1.36    0.17
  -2   6  -1    1.54    0.20
   3  -6   1    0.69    0.18
   3  -6   1    0.64    0.13
  -3  -6  -1    0.40    0.18
   3  -6   1    0.58    0.20
   3   6   1    0.67    0.15
  -3   6  -1    0.36    0.16
  -3   6  -1    0.60    0.13
   3   6   1    0.62    0.13
  -3   6  -1    0.62    0.19
  -3   6  -1    0.29    0.19
   3   6   1    0.41    0.18
  -4  -6  -1   25.91    0.56
   4  -6   1   26.32    0.55
  -4  -6  -1   25.97    0.58
   4  -6   1   26.26    0.62
  -4  -6  -1   25.67    0.61
   4  -6   1   26.00    0.59
   4   6   1   26.24    0.57
  -4   6  -1   25.70    0.62
  -4   6  -1   26.34    0.66
   4   6   1   26.34    0.58
   4   6   1   25.20    0.59
  -4   6  -1   26.63    0.59
  -4   6  -1   26.54    0.55
   5  -6   1    3.98    0.29
   5  -6   1    4.00    0.28
  -5  -6  -1    3.73    0.24
   5  -6   1    4.04    0.22
  -5  -6  -1    3.74    0.22
  -5  -6  -1    4.10    0.29
  -5   6  -1    3.97    0.21
  -5   6  -1    4.22    0.26
  -5   6  -1    4.22    0.30
   5   6   1    4.14    0.26
  -5   6  -1    3.81    0.34
   5   6   1    3.52    0.23
   5   6   1    3.94    0.27
  -6  -6  -1   42.68    0.89
   6  -6   1   41.79    0.89
   6  -6   1   41.95    0.87
  -6  -6  -1   42.57    0.87
  -6  -6  -1   42.12    0.87
   6   6   1   41.86    0.91
  -6   6  -1   42.37    0.83
  -6   6  -1   41.62    0.98
  -6   6  -1   41.43    0.88
   6   6   1   40.81    0.86
   6   6   1   40.89    0.84
  -6   6  -1   42.37    0.91
  -7  -6  -1    2.29    0.27
  -7  -6  -1    2.26    0.24
   7  -6   1    2.08    0.30
   7  -6   1    2.41    0.28
  -7  -6  -1    2.29    0.30
  -7   6  -1    2.30    0.21
   7   6   1    2.34    0.23
  -7   6  -1    2.25    0.33
   7   6   1    2.37    0.26
   7   6   1    2.87    0.34
  -7   6  -1    2.47    0.34
  -7   6  -1    2.92    0.40
   8  -6   1   17.06    0.48
  -8  -6  -1   16.69    0.48
   8  -6   1   17.18    0.48
  -8  -6  -1   16.90    0.49
  -8  -6  -1   16.68    0.52
  -8   6  -1   17.02    0.44
  -8   6  -1   16.39    0.50
  -8   6  -1   16.19    0.63
  -8   6  -1   17.06    0.55
   8   6   1   16.15    0.57
  -9  -6  -1    0.32    0.20
   9  -6   1    0.29    0.21
  -9  -6  -1    0.14    0.36
   9  -6   1    0.25    0.21
  -9  -6  -1    0.29    0.20
  -9   6  -1    0.26    0.22
   9   6   1    0.36    0.43
  -9   6  -1    0.56    0.26
  -9   6  -1    0.18    0.17
  -9   6  -1    0.12    0.37
 -10  -6  -1    0.45    0.23
 -10  -6  -1    0.46    0.22
 -10   6  -1   -0.03    0.30
  10   6   1    0.32    0.28
 -10   6  -1    0.32    0.28
 -10   6  -1    0.16    0.24
 -10   6  -1    0.33    0.28
 -11  -6  -1    3.36    0.40
 -11  -6  -1    2.85    0.31
 -11  -6  -1    3.12    0.30
  11   6   1    2.66    0.39
 -11   6  -1    2.81    0.40
 -11   6  -1    2.51    0.40
 -11   6  -1    3.31    0.38
 -12  -6  -1    3.58    0.45
 -12  -6  -1    3.25    0.42
 -12   6  -1    4.27    0.40
 -12   6  -1    3.76    0.51
  12   6   1    3.69    0.52
 -12   6  -1    3.55    0.50
 -12   6  -1    3.06    0.42
 -13  -6  -1    0.06    0.31
 -13  -6  -1    0.09    0.37
 -13  -6  -1    1.09    0.33
 -13  -6  -1    0.07    0.29
  13   6   1   -0.12    0.57
 -13   6  -1   -0.27    0.33
 -13   6  -1   -0.11    0.26
 -13   6  -1    0.51    0.48
 -13   6  -1    0.21    0.37
 -14  -6  -1    1.70    0.45
 -14  -6  -1    2.53    0.40
 -14  -6  -1    2.19    0.48
 -14   6  -1    2.55    0.54
 -14   6  -1    2.17    0.47
 -14   6  -1    2.33    0.43
  14   6   1    1.62    0.59
 -14  -7   1    1.65    0.50
 -14  -7   1    0.93    0.32
 -14   7   1    0.72    0.39
 -14   7   1    0.19    0.41
  14   7  -1    0.62    0.51
 -14   7   1   -0.09    0.54
 -13  -7   1    1.43    0.37
 -13  -7   1    2.03    0.32
 -13  -7   1    1.06    0.34
 -13   7   1    1.82    0.40
  13   7  -1    1.62    0.45
 -13   7   1    1.17    0.36
 -13   7   1    1.28    0.50
 -13   7   1    1.63    0.27
 -12  -7   1    0.46    0.26
 -12  -7   1    0.58    0.30
 -12   7   1    0.26    0.44
 -12   7   1    0.35    0.21
 -12   7   1    0.33    0.32
  12   7  -1    0.41    0.33
 -12   7   1    0.41    0.28
 -11  -7   1    0.18    0.22
 -11  -7   1    0.00    0.28
 -11  -7   1   -0.02    0.23
 -11  -7   1    0.20    0.26
  11   7  -1    0.11    0.34
 -11   7   1   -0.52    0.38
 -11   7   1    0.30    0.19
 -11   7   1    0.31    0.32
 -11   7   1    0.00    0.25
 -10  -7   1    1.89    0.27
 -10  -7   1    1.76    0.31
 -10  -7   1    1.63    0.25
 -10  -7   1    1.43    0.24
 -10   7   1    1.50    0.26
 -10   7   1    1.78    0.36
 -10   7   1    1.68    0.18
 -10   7   1    2.10    0.33
  -9  -7   1    5.96    0.34
  -9  -7   1    6.47    0.35
  -9  -7   1    6.16    0.36
   9   7  -1    5.76    0.45
  -9   7   1    5.97    0.27
  -9   7   1    6.57    0.43
  -9   7   1    5.58    0.36
  -9   7   1    5.47    0.51
   8  -7  -1    4.08    0.31
  -8  -7   1    4.50    0.29
   8  -7  -1    4.09    0.31
  -8  -7   1    4.37    0.30
  -8  -7   1    4.43    0.30
  -8  -7   1    4.38    0.36
  -8   7   1    4.52    0.23
  -8   7   1    4.70    0.49
  -8   7   1    3.95    0.39
   8   7  -1    4.37    0.38
  -8   7   1    3.57    0.53
   7  -7  -1    2.68    0.29
   7  -7  -1    2.24    0.30
  -7  -7   1    2.33    0.23
  -7  -7   1    2.67    0.24
  -7  -7   1    2.73    0.26
  -7  -7   1    2.50    0.27
  -7   7   1    2.84    0.34
   7   7  -1    2.39    0.32
  -7   7   1    2.71    0.42
  -7   7   1    2.43    0.36
  -7   7   1    2.97    0.20
  -6  -7   1    0.42    0.16
   6  -7  -1    0.32    0.18
  -6  -7   1    0.57    0.14
  -6  -7   1    0.58    0.20
   6  -7  -1    0.59    0.22
  -6  -7   1    0.45    0.10
   6   7  -1    0.55    0.17
  -6   7   1    0.52    0.19
  -6   7   1    0.54    0.12
   6   7  -1    0.41    0.14
  -6   7   1    0.27    0.24
   6   7  -1    0.65    0.18
  -6   7   1    0.40    0.23
   5  -7  -1   -0.05    0.12
  -5  -7   1   -0.10    0.15
   5  -7  -1    0.17    0.17
   5  -7  -1   -0.15    0.19
  -5  -7   1   -0.13    0.20
  -5  -7   1   -0.10    0.18
   5   7  -1   -0.16    0.14
  -5   7   1    0.07    0.15
   5   7  -1   -0.04    0.17
  -5   7   1    0.06    0.20
  -5   7   1    0.13    0.10
   5   7  -1   -0.22    0.14
  -5   7   1    0.01    0.21
   4  -7  -1    8.48    0.24
  -4  -7   1    8.03    0.31
   4  -7  -1    8.53    0.36
   4  -7  -1    8.54    0.33
  -4  -7   1    7.71    0.35
  -4  -7   1    8.00    0.36
  -4   7   1    8.04    0.36
  -4   7   1    8.41    0.24
   4   7  -1    7.90    0.39
   4   7  -1    8.12    0.29
  -4   7   1    8.11    0.32
   4   7  -1    7.81    0.32
   3  -7  -1   14.85    0.41
   3  -7  -1   15.24    0.35
  -3  -7   1   14.19    0.44
  -3  -7   1   14.70    0.44
  -3  -7   1   14.80    0.40
   3  -7  -1   14.98    0.44
  -3   7   1   14.81    0.45
   3   7  -1   15.26    0.39
  -3   7   1   15.45    0.42
  -3   7   1   15.36    0.36
   3   7  -1   14.54    0.43
   3   7  -1   15.26    0.37
  -3   7   1   14.63    0.46
  -2  -7   1    6.21    0.27
   2  -7  -1    6.45    0.33
  -2  -7   1    6.66    0.33
  -2  -7   1    6.46    0.31
   2  -7  -1    6.40    0.24
   2  -7  -1    6.55    0.29
   2   7  -1    6.43    0.27
  -2   7   1    6.36    0.29
  -2   7   1    6.10    0.32
   2   7  -1    6.51    0.32
  -2   7   1    6.63    0.33
   2   7  -1    6.98    0.23
  -1  -7   1   -0.18    0.18
   1  -7  -1    0.06    0.15
  -1  -7   1   -0.18    0.15
   1  -7  -1    0.15    0.14
   1  -7  -1   -0.13    0.18
  -1  -7   1    0.04    0.16
   1   7  -1   -0.15    0.15
   1   7  -1   -0.12    0.10
  -1   7   1   -0.16    0.14
  -1   7   1    0.08    0.19
   1   7  -1    0.00    0.19
  -1   7   1   -0.13    0.16
   0  -7  -1    0.16    0.15
   0  -7  -1    0.18    0.19
   0  -7   1    0.38    0.16
   0  -7  -1    0.12    0.14
   0  -7   1    0.22    0.20
   0  -7   1    0.17    0.15
   0   7  -1    0.16    0.16
   0   7   1    0.08    0.18
   0   7  -1    0.09    0.18
   0   7   1    0.04    0.15
   0   7  -1    0.06    0.16
   0   7   1    0.11    0.13
   1  -7   1   20.87    0.55
  -1  -7  -1   20.48    0.50
  -1  -7  -1   20.89    0.54
   1  -7   1   20.47    0.51
   1  -7   1   20.95    0.48
  -1  -7  -1   20.71    0.51
  -1   7  -1   20.75    0.51
  -1   7  -1   21.49    0.49
   1   7   1   20.71    0.50
   1   7   1   19.82    0.42
   1   7   1   21.02    0.54
  -1   7  -1   20.76    0.54
  -2  -7  -1    2.75    0.27
  -2  -7  -1    2.77    0.29
   2  -7   1    2.89    0.21
   2  -7   1    2.67    0.30
   2  -7   1    3.22    0.26
  -2  -7  -1    3.01    0.24
   2   7   1    2.94    0.29
  -2   7  -1    3.15    0.22
  -2   7  -1    2.78    0.25
   2   7   1    2.91    0.24
   2   7   1    3.07    0.21
  -2   7  -1    2.96    0.30
   3  -7   1    1.08    0.20
   3  -7   1    1.40    0.15
  -3  -7  -1    1.18    0.20
   3  -7   1    1.39    0.19
  -3  -7  -1    1.22    0.17
  -3   7  -1    1.27    0.19
   3   7   1    1.19    0.20
   3   7   1    1.19    0.16
  -3   7  -1    1.32    0.18
  -3   7  -1    1.18    0.21
   3   7   1    1.29    0.19
  -4  -7  -1    3.92    0.31
  -4  -7  -1    4.03    0.26
   4  -7   1    4.31    0.23
   4  -7   1    4.20    0.32
   4  -7   1    4.86    0.29
   4   7   1    4.48    0.25
   4   7   1    4.36    0.26
  -4   7  -1    4.30    0.28
  -4   7  -1    4.93    0.34
  -4   7  -1    4.68    0.22
  -4   7  -1    4.47    0.32
   4   7   1    4.36    0.30
  -5  -7  -1    7.90    0.29
   5  -7   1    7.75    0.28
  -5  -7  -1    8.05    0.36
  -5  -7  -1    8.06    0.32
   5  -7   1    8.16    0.34
   5  -7   1    8.30    0.37
   5   7   1    8.07    0.33
   5   7   1    7.78    0.34
  -5   7  -1    8.04    0.38
  -5   7  -1    8.41    0.27
  -5   7  -1    8.28    0.33
  -5   7  -1    8.11    0.42
   5   7   1    7.90    0.31
  -6  -7  -1    2.35    0.32
  -6  -7  -1    2.35    0.23
  -6  -7  -1    2.32    0.26
   6  -7   1    2.36    0.30
   6  -7   1    2.25    0.23
   6  -7   1    2.07    0.32
   6   7   1    2.05    0.24
   6   7   1    2.17    0.29
  -6   7  -1    2.33    0.21
  -6   7  -1    2.42    0.29
   6   7   1    2.70    0.29
  -6   7  -1    2.32    0.25
  -6   7  -1    2.27    0.30
  -7  -7  -1    0.27    0.27
   7  -7   1   -0.02    0.22
   7  -7   1   -0.25    0.21
  -7  -7  -1   -0.05    0.19
  -7  -7  -1   -0.02    0.17
  -7   7  -1   -0.16    0.25
   7   7   1   -0.06    0.23
   7   7   1   -0.07    0.20
  -7   7  -1    0.02    0.15
   7   7   1   -0.07    0.17
  -7   7  -1   -0.16    0.23
  -7   7  -1   -0.40    0.32
  -8  -7  -1    3.02    0.30
   8  -7   1    2.64    0.34
  -8  -7  -1    3.46    0.37
   8  -7   1    2.69    0.34
  -8  -7  -1    3.19    0.31
  -8   7  -1    2.50    0.34
  -8   7  -1    3.15    0.26
  -8   7  -1    2.66    0.40
  -8   7  -1    3.52    0.47
   8   7   1    3.98    0.52
   9  -7   1    5.18    0.37
  -9  -7  -1    5.26    0.38
  -9  -7  -1    5.53    0.35
  -9  -7  -1    4.62    0.66
   9  -7   1    5.55    0.37
  -9   7  -1    5.76    0.31
  -9   7  -1    4.92    0.45
  -9   7  -1    5.79    0.54
   9   7   1    4.73    0.74
  -9   7  -1    5.17    0.38
 -10  -7  -1    0.35    0.27
 -10  -7  -1    0.34    0.24
 -10  -7  -1    0.47    0.22
 -10   7  -1    0.62    0.36
 -10   7  -1    0.51    0.29
  10   7   1    0.32    0.31
 -10   7  -1    0.49    0.20
 -10   7  -1    0.39    0.28
 -11  -7  -1    4.70    0.42
 -11  -7  -1    4.91    0.46
 -11  -7  -1    5.03    0.42
 -11   7  -1    3.91    0.45
 -11   7  -1    4.92    0.48
 -11   7  -1    4.58    0.49
  11   7   1    5.78    0.54
 -11   7  -1    4.47    0.61
 -12  -7  -1   -0.49    0.34
 -12  -7  -1   -0.20    0.27
 -12  -7  -1   -0.26    0.40
 -12   7  -1    0.45    0.34
 -12   7  -1   -0.26    0.32
  12   7   1    0.34    0.42
 -12   7  -1   -0.21    0.34
 -12   7  -1    0.24    0.38
 -13  -7  -1    1.45    0.34
 -13  -7  -1    2.06    0.35
 -13  -7  -1    1.95    0.42
  13   7   1    1.44    0.54
 -13   7  -1    1.31    0.50
 -13   7  -1    2.27    0.38
 -13   7  -1    3.07    0.41
 -14  -7  -1    2.64    0.47
 -14  -7  -1    1.54    0.38
 -14  -7  -1    2.20    0.36
  14   7   1    0.64    0.52
 -14   7  -1    3.07    0.44
 -14   7  -1    1.07    0.65
 -14   7  -1    0.31    0.46
 -13  -8   1    2.55    0.49
 -13  -8   1    1.89    0.33
 -13  -8   1    2.79    0.47
 -13  -8   1    1.46    0.33
 -13  -8   1    1.56    0.42
  13   8  -1    1.23    0.48
 -13   8   1    0.96    0.41
 -13   8   1    2.49    0.52
 -13   8   1    2.09    0.41
 -12  -8   1    0.76    0.33
 -12  -8   1    0.59    0.27
 -12  -8   1   -0.04    0.40
 -12   8   1   -0.65    0.31
  12   8  -1    0.26    0.39
 -12   8   1    0.47    0.46
 -12   8   1    0.08    0.37
 -11  -8   1    0.59    0.27
 -11  -8   1    0.46    0.26
 -11  -8   1   -0.11    0.38
 -11  -8   1    0.93    0.30
 -11  -8   1    0.55    0.23
 -11   8   1    0.40    0.37
 -11   8   1    0.55    0.19
 -11   8   1    0.12    0.32
  11   8  -1   -0.04    0.26
 -11   8   1    0.51    0.42
 -10  -8   1   22.50    0.66
 -10  -8   1   22.40    0.62
 -10  -8   1   23.69    0.60
 -10  -8   1   22.61    0.62
 -10   8   1   22.74    0.52
 -10   8   1   22.85    0.85
 -10   8   1   23.09    0.66
 -10   8   1   21.73    0.95
   9  -8  -1    1.96    0.24
  -9  -8   1    2.23    0.30
  -9  -8   1    2.09    0.37
   9  -8  -1    2.31    0.25
  -9  -8   1    2.11    0.28
  -9  -8   1    2.35    0.26
   9   8  -1    2.01    0.35
  -9   8   1    2.13    0.39
  -9   8   1    1.88    0.31
  -9   8   1    2.11    0.29
  -8  -8   1    8.02    0.37
  -8  -8   1    8.43    0.35
  -8  -8   1    9.31    0.51
   8  -8  -1    8.37    0.40
   8  -8  -1    8.04    0.39
  -8  -8   1    8.45    0.29
  -8  -8   1    7.95    0.43
  -8   8   1    8.28    0.63
  -8   8   1    8.11    0.46
  -8   8   1    8.39    0.41
   8   8  -1    8.10    0.45
  -7  -8   1    6.82    0.46
  -7  -8   1    7.44    0.31
  -7  -8   1    7.31    0.35
   7  -8  -1    7.31    0.37
   7  -8  -1    7.06    0.39
  -7   8   1    7.62    0.45
  -7   8   1    7.53    0.51
   7   8  -1    7.47    0.39
  -7   8   1    7.83    0.38
   6  -8  -1    9.59    0.41
  -6  -8   1    9.33    0.42
  -6  -8   1    9.20    0.37
  -6  -8   1    9.41    0.46
   6  -8  -1    9.13    0.39
   6   8  -1    9.28    0.36
   6   8  -1    9.24    0.37
  -6   8   1    9.71    0.28
  -6   8   1    9.10    0.45
  -6   8   1    9.23    0.56
  -6   8   1    9.73    0.49
   6   8  -1    8.98    0.32
  -5  -8   1    0.12    0.22
   5  -8  -1    0.38    0.20
   5  -8  -1    0.28    0.13
  -5  -8   1   -0.19    0.21
  -5  -8   1    0.04    0.18
   5  -8  -1   -0.12    0.21
  -5   8   1    0.18    0.12
   5   8  -1    0.24    0.16
  -5   8   1    0.12    0.22
  -5   8   1    0.04    0.19
   5   8  -1    0.16    0.19
   5   8  -1    0.11    0.17
  -4  -8   1   10.56    0.41
   4  -8  -1   10.12    0.37
   4  -8  -1   10.61    0.41
  -4  -8   1   10.25    0.41
  -4  -8   1   10.89    0.36
   4  -8  -1   10.66    0.29
   4   8  -1   10.59    0.39
  -4   8   1   10.71    0.30
   4   8  -1   11.09    0.35
   4   8  -1   10.59    0.32
  -4   8   1   10.37    0.42
  -4   8   1   10.12    0.44
  -3  -8   1    0.32    0.18
   3  -8  -1   -0.03    0.20
   3  -8  -1    0.26    0.17
  -3  -8   1    0.32    0.16
   3  -8  -1    0.25    0.12
  -3  -8   1    0.22    0.19
  -3   8   1    0.40    0.18
  -3   8   1    0.15    0.19
   3   8  -1    0.34    0.14
   3   8  -1    0.22    0.19
  -3   8   1    0.25    0.20
   3   8  -1    0.15    0.16
  -2  -8   1    3.26    0.27
   2  -8  -1    3.13    0.27
   2  -8  -1    3.39    0.21
  -2  -8   1    3.66    0.26
  -2  -8   1    3.50    0.31
   2  -8  -1    3.15    0.32
  -2   8   1    3.44    0.27
   2   8  -1    3.38    0.25
   2   8  -1    3.63    0.31
   2   8  -1    3.63    0.20
  -2   8   1    3.09    0.32
  -2   8   1    3.26    0.29
  -1  -8   1    2.59    0.31
   1  -8  -1    2.76    0.31
   1  -8  -1    2.63    0.24
  -1  -8   1    2.59    0.25
   1  -8  -1    2.98    0.22
  -1  -8   1    2.32    0.25
  -1   8   1    2.69    0.25
  -1   8   1    2.44    0.24
  -1   8   1    2.50    0.30
   1   8  -1    2.65    0.30
   1   8  -1    2.38    0.15
   1   8  -1    2.78    0.25
   0  -8   1    0.65    0.16
   0  -8  -1    0.39    0.20
   0  -8  -1    0.50    0.15
   0  -8   1    0.20    0.16
   0  -8  -1    0.28    0.16
   0  -8   1    0.01    0.20
   0   8  -1    0.29    0.17
   0   8   1    0.27    0.15
   0   8  -1    0.07    0.20
   0   8   1    0.39    0.16
   0   8   1    0.44    0.20
  -1  -8  -1    1.02    0.20
   1  -8   1    1.37    0.17
   1  -8   1    1.20    0.19
  -1  -8  -1    1.08    0.18
   1  -8   1    1.22    0.22
  -1  -8  -1    1.31    0.18
   1   8   1    0.93    0.17
   1   8   1    1.28    0.22
   1   8   1    0.94    0.13
  -1   8  -1    1.14    0.18
  -1   8  -1    1.08    0.18
  -1   8  -1    1.16    0.22
  -2  -8  -1    8.61    0.33
  -2  -8  -1    8.72    0.38
  -2  -8  -1    8.42    0.36
   2  -8   1    8.48    0.38
   2  -8   1    8.43    0.34
   2  -8   1    8.72    0.30
  -2   8  -1    8.64    0.31
  -2   8  -1    8.86    0.34
   2   8   1    8.87    0.33
   2   8   1    8.64    0.29
  -2   8  -1    8.55    0.38
   2   8   1    8.80    0.38
  -3  -8  -1    0.15    0.20
   3  -8   1   -0.06    0.20
   3  -8   1   -0.02    0.17
   3  -8   1   -0.12    0.14
  -3  -8  -1   -0.27    0.15
  -3  -8  -1   -0.17    0.18
   3   8   1    0.22    0.17
  -3   8  -1   -0.05    0.20
  -3   8  -1   -0.10    0.13
   3   8   1    0.02    0.14
  -3   8  -1   -0.42    0.24
   3   8   1    0.20    0.20
   4  -8   1   40.33    0.87
  -4  -8  -1   40.38    0.90
   4  -8   1   40.41    0.82
  -4  -8  -1   39.75    0.85
   4  -8   1   40.60    0.89
   4   8   1   40.07    0.88
  -4   8  -1   40.14    0.87
  -4   8  -1   41.08    0.94
  -4   8  -1   40.76    0.82
   4   8   1   40.57    0.85
   4   8   1   39.15    0.99
  -4   8  -1   40.18    0.90
   5  -8   1    4.87    0.33
   5  -8   1    4.87    0.26
   5  -8   1    5.15    0.42
  -5  -8  -1    4.64    0.30
  -5   8  -1    4.74    0.38
   5   8   1    5.09    0.30
   5   8   1    5.29    0.34
  -5   8  -1    4.79    0.25
  -5   8  -1    4.31    0.37
  -5   8  -1    4.81    0.41
  -6  -8  -1   28.71    0.71
   6  -8   1   27.56    0.63
   6  -8   1   28.30    0.69
  -6  -8  -1   28.56    0.67
  -6  -8  -1   27.57    0.64
   6   8   1   27.84    0.64
  -6   8  -1   27.48    0.79
  -6   8  -1   27.58    0.73
  -6   8  -1   28.02    0.61
   6   8   1   27.82    0.68
   6   8   1   28.22    0.68
  -6   8  -1   28.36    0.68
   7  -8   1   -0.18    0.23
  -7  -8  -1    0.09    0.21
  -7  -8  -1    0.14    0.15
   7   8   1   -0.03    0.22
  -7   8  -1    0.06    0.21
  -7   8  -1    0.49    0.33
  -7   8  -1    0.30    0.27
   7   8   1   -0.09    0.20
   7   8   1    0.23    0.19
  -7   8  -1    0.09    0.16
   8  -8   1    6.05    0.40
  -8  -8  -1    5.24    0.41
   8  -8   1    5.08    0.67
  -8  -8  -1    6.29    0.35
  -8  -8  -1    5.39    0.31
  -8  -8  -1    6.38    0.37
   8   8   1    6.17    0.55
  -8   8  -1    5.98    0.66
  -8   8  -1    5.86    0.30
  -8   8  -1    5.44    0.40
  -8   8  -1    5.88    0.46
  -9  -8  -1   -0.23    0.22
   9  -8   1   -0.25    0.25
   9  -8   1   -0.19    0.27
  -9  -8  -1    0.13    0.22
  -9  -8  -1    0.28    0.30
   9   8   1    0.11    0.27
  -9   8  -1    0.20    0.30
  -9   8  -1    0.02    0.18
  -9   8  -1   -0.36    0.32
  -9   8  -1    0.16    0.25
 -10  -8  -1    1.84    0.26
  10  -8   1    1.69    0.28
 -10  -8  -1    1.64    0.28
 -10  -8  -1    1.71    0.34
 -10  -8  -1    1.38    0.27
  10  -8   1    1.56    0.29
 -10   8  -1    1.49    0.40
  10   8   1    1.92    0.32
 -10   8  -1    1.78    0.34
 -10   8  -1    1.34    0.29
 -10   8  -1    1.48    0.22
 -11  -8  -1    2.53    0.34
 -11  -8  -1    2.45    0.47
 -11  -8  -1    1.92    0.31
 -11  -8  -1    1.96    0.33
  11   8   1    1.68    0.41
 -11   8  -1    1.81    0.41
 -11   8  -1    1.54    0.30
 -11   8  -1    1.68    0.37
 -11   8  -1    2.09    0.26
 -12  -8  -1    1.65    0.29
 -12  -8  -1    2.62    0.36
 -12  -8  -1    2.60    0.45
  12   8   1    1.37    0.38
 -12   8  -1    2.34    0.36
 -12   8  -1    1.98    0.36
 -12   8  -1    2.42    0.48
 -12   8  -1    1.31    0.42
 -13  -8  -1    1.01    0.33
 -13   8  -1    0.09    0.53
 -13   8  -1    1.04    0.30
  13   8   1   -0.32    0.58
 -13   8  -1    0.99    0.39
 -13   8  -1    0.06    0.42
 -13  -9   1    2.30    0.36
 -13  -9   1    1.34    0.34
 -13  -9   1    3.03    0.55
 -13  -9   1    2.07    0.44
 -13   9   1    2.12    0.46
  13   9  -1    2.04    0.52
 -13   9   1    1.75    0.55
 -13   9   1    2.40    0.44
 -12  -9   1    0.92    0.38
 -12  -9   1   -0.43    0.47
 -12  -9   1    0.37    0.26
 -12  -9   1   -0.19    0.31
 -12   9   1    0.22    0.48
 -12   9   1    0.52    0.36
 -12   9   1    0.58    0.37
  12   9  -1    1.01    0.41
 -11  -9   1    2.18    0.33
 -11  -9   1    1.77    0.36
 -11  -9   1    1.78    0.37
 -11  -9   1    1.49    0.26
 -11  -9   1    1.49    0.43
 -11   9   1    1.90    0.44
 -11   9   1    1.29    0.36
 -11   9   1    1.35    0.34
  11   9  -1    1.23    0.41
 -10  -9   1    1.76    0.25
 -10  -9   1    1.89    0.28
 -10  -9   1    1.96    0.41
 -10  -9   1    2.31    0.29
 -10  -9   1    2.06    0.32
 -10   9   1    1.62    0.32
  10   9  -1    1.66    0.55
 -10   9   1    1.74    0.32
 -10   9   1    1.40    0.42
 -10   9   1    2.01    0.47
  -9  -9   1    7.18    0.56
  -9  -9   1    8.46    0.48
   9  -9  -1    7.54    0.42
  -9  -9   1    6.97    0.35
  -9  -9   1    7.74    0.43
   9  -9  -1    8.33    0.44
  -9   9   1    7.90    0.66
   9   9  -1    8.26    0.82
  -9   9   1    7.77    0.45
  -9   9   1    6.25    0.62
  -8  -9   1    0.29    0.23
   8  -9  -1   -0.27    0.25
  -8  -9   1    0.04    0.33
  -8  -9   1    0.23    0.18
  -8  -9   1   -0.13    0.28
   8  -9  -1   -0.09    0.29
  -8   9   1   -0.08    0.23
  -8   9   1   -0.03    0.28
  -8   9   1   -0.25    0.33
  -8   9   1    0.11    0.33
   8   9  -1    0.35    0.26
   7  -9  -1    2.44    0.37
  -7  -9   1    1.99    0.28
  -7  -9   1    2.24    0.51
  -7  -9   1    2.61    0.33
   7   9  -1    2.64    0.31
  -7   9   1    2.88    0.43
  -7   9   1    2.22    0.35
   7   9  -1    2.11    0.26
   7   9  -1    2.58    0.34
  -7   9   1    2.26    0.53
  -7   9   1    3.20    0.38
   6  -9  -1    8.18    0.44
   6  -9  -1    7.49    0.39
  -6  -9   1    8.18    0.47
  -6  -9   1    7.37    0.37
   6  -9  -1    7.73    0.28
  -6   9   1    7.32    0.52
  -6   9   1    7.93    0.46
   6   9  -1    7.04    0.36
  -6   9   1    7.50    0.40
  -6   9   1    7.85    0.51
   6   9  -1    7.34    0.38
  -6   9   1    7.46    0.27
   6   9  -1    7.20    0.34
   5  -9  -1    0.84    0.15
  -5  -9   1    0.72    0.21
   5  -9  -1    0.51    0.24
  -5  -9   1    0.58    0.26
   5  -9  -1    0.94    0.23
  -5  -9   1    0.23    0.25
  -5   9   1    0.53    0.26
  -5   9   1    0.58    0.22
   5   9  -1    0.68    0.20
  -5   9   1    0.88    0.30
   5   9  -1    0.74    0.18
   5   9  -1    0.65    0.23
  -5   9   1    0.63    0.16
  -4  -9   1    0.35    0.24
   4  -9  -1    0.40    0.21
   4  -9  -1    0.39    0.24
  -4  -9   1    0.21    0.24
  -4  -9   1    0.13    0.19
   4  -9  -1    0.32    0.14
   4   9  -1    0.52    0.15
  -4   9   1    0.38    0.24
  -4   9   1   -0.01    0.20
  -4   9   1    0.44    0.15
  -4   9   1    0.32    0.24
   4   9  -1    0.22    0.22
   4   9  -1    0.24    0.20
   3  -9  -1   11.73    0.45
   3  -9  -1   11.86    0.33
  -3  -9   1   11.62    0.44
   3  -9  -1   11.67    0.41
  -3  -9   1   11.74    0.40
  -3  -9   1   12.27    0.46
  -3   9   1   11.92    0.46
   3   9  -1   11.93    0.35
  -3   9   1   11.92    0.47
   3   9  -1   11.53    0.44
   3   9  -1   11.94    0.39
  -2  -9   1    0.35    0.22
   2  -9  -1    0.20    0.23
  -2  -9   1    0.28    0.18
   2  -9  -1    0.24    0.15
  -2  -9   1    0.30    0.18
   2  -9  -1    0.05    0.18
   2   9  -1    0.01    0.17
  -2   9   1    0.29    0.19
   2   9  -1    0.24    0.13
   2   9  -1    0.26    0.21
  -2   9   1   -0.06    0.21
  -1  -9   1   21.34    0.59
   1  -9  -1   20.72    0.53
  -1  -9   1   20.96    0.54
   1  -9  -1   21.37    0.58
  -1  -9   1   20.62    0.53
   1  -9  -1   21.04    0.50
   1   9  -1   20.58    0.57
   1   9  -1   20.67    0.57
   1   9  -1   19.35    0.43
  -1   9   1   20.73    0.58
  -1   9   1   19.14    0.50
  -1   9   1   20.85    0.53
   0  -9  -1    3.00    0.26
   0  -9   1    3.04    0.32
   0  -9   1    2.53    0.27
   0  -9  -1    2.97    0.32
   0  -9   1    2.77    0.26
   0  -9  -1    3.16    0.27
   0   9  -1    2.68    0.23
   0   9  -1    2.70    0.32
   0   9   1    3.33    0.33
   0   9   1    2.92    0.28
   0   9   1    2.71    0.21
   1  -9   1    2.13    0.26
   1  -9   1    1.77    0.19
   1  -9   1    1.74    0.27
  -1  -9  -1    1.64    0.20
  -1  -9  -1    1.70    0.26
  -1  -9  -1    2.22    0.32
  -1   9  -1    1.73    0.26
  -1   9  -1    2.14    0.26
   1   9   1    1.68    0.15
   1   9   1    2.08    0.32
   1   9   1    1.84    0.34
  -1   9  -1    1.59    0.24
   2  -9   1    8.65    0.37
  -2  -9  -1    8.75    0.36
  -2  -9  -1    8.25    0.40
   2  -9   1    8.25    0.42
  -2  -9  -1    8.57    0.35
   2  -9   1    8.43    0.31
   2   9   1    8.88    0.31
  -2   9  -1    8.67    0.36
  -2   9  -1    8.76    0.33
  -2   9  -1    8.49    0.41
   2   9   1    8.65    0.40
  -3  -9  -1    2.38    0.35
  -3  -9  -1    2.61    0.28
   3  -9   1    2.35    0.24
   3  -9   1    2.69    0.31
  -3  -9  -1    1.85    0.25
   3  -9   1    2.45    0.35
   3   9   1    2.64    0.33
  -3   9  -1    2.43    0.35
   3   9   1    2.15    0.26
   3   9   1    2.15    0.25
  -3   9  -1    2.44    0.40
  -3   9  -1    2.02    0.24
   4  -9   1    6.09    0.36
   4  -9   1    6.50    0.28
  -4  -9  -1    5.80    0.39
   4  -9   1    6.29    0.46
  -4  -9  -1    5.75    0.33
   4   9   1    6.49    0.33
  -4   9  -1    6.20    0.28
  -4   9  -1    5.86    0.43
  -4   9  -1    6.21    0.35
   4   9   1    5.55    0.38
   4   9   1    6.21    0.31
  -4   9  -1    6.14    0.41
   5  -9   1   23.64    0.63
   5  -9   1   23.87    0.55
  -5  -9  -1   23.27    0.61
  -5  -9  -1   22.08    0.68
  -5   9  -1   23.88    0.63
  -5   9  -1   23.97    0.68
   5   9   1   23.26    0.60
  -5   9  -1   23.88    0.55
  -5   9  -1   23.89    0.72
   5   9   1   23.89    0.60
   5   9   1   23.33    0.64
  -6  -9  -1    5.90    0.42
   6  -9   1    6.23    0.32
  -6  -9  -1    6.12    0.37
   6  -9   1    5.95    0.41
  -6   9  -1    6.43    0.51
   6   9   1    5.99    0.34
   6   9   1    6.31    0.40
   6   9   1    6.85    0.38
  -6   9  -1    6.56    0.30
  -6   9  -1    5.73    0.44
  -6   9  -1    6.09    0.39
  -7  -9  -1    0.93    0.25
   7  -9   1    0.86    0.44
   7  -9   1    0.70    0.26
  -7  -9  -1    0.51    0.27
  -7   9  -1    0.92    0.34
  -7   9  -1    0.78    0.19
  -7   9  -1    0.99    0.29
   7   9   1    0.63    0.22
   7   9   1    1.01    0.26
   7   9   1    0.76    0.29
  -7   9  -1    0.58    0.26
   8  -9   1   11.92    0.51
  -8  -9  -1   12.01    0.46
  -8  -9  -1   11.86    0.44
  -8  -9  -1   12.59    0.53
  -8   9  -1   12.33    0.39
  -8   9  -1   11.86    0.65
  -8   9  -1   12.66    0.50
   8   9   1   12.04    0.52
   8   9   1   12.52    0.45
   9  -9   1    3.79    0.42
   9  -9   1    3.84    0.52
  -9  -9  -1    4.42    0.48
  -9  -9  -1    3.35    0.33
  -9  -9  -1    4.41    0.40
  -9  -9  -1    4.48    0.31
  -9   9  -1    4.71    0.57
   9   9   1    4.00    0.46
  -9   9  -1    4.22    0.31
  -9   9  -1    4.29    0.49
  -9   9  -1    3.27    0.41
  10  -9   1    0.51    0.30
 -10  -9  -1    0.69    0.23
 -10  -9  -1    0.51    0.29
 -10  -9  -1    0.43    0.31
 -10  -9  -1    0.28    0.23
  10   9   1    0.27    0.33
 -10   9  -1   -0.20    0.32
 -10   9  -1    0.21    0.28
 -10   9  -1    0.45    0.21
 -10   9  -1    0.54    0.45
 -11  -9  -1    1.73    0.37
 -11  -9  -1    3.32    0.48
 -11  -9  -1    2.34    0.32
 -11  -9  -1    2.81    0.39
 -11   9  -1    2.15    0.48
  11   9   1    2.38    0.38
 -11   9  -1    2.54    0.33
 -11   9  -1    2.39    0.38
 -11   9  -1    1.73    0.37
 -12  -9  -1    1.63    0.32
 -12  -9  -1    1.37    0.30
 -12  -9  -1    1.06    0.39
 -12  -9  -1    1.50    0.31
  12   9   1    1.09    0.47
 -12   9  -1    1.80    0.40
 -12   9  -1    0.60    0.39
 -12   9  -1    0.82    0.52
 -13  -9  -1    7.12    0.53
 -13  -9  -1    5.54    0.70
 -13  -9  -1    7.59    0.54
 -13   9  -1    8.34    0.80
  13   9   1    6.93    0.79
 -13   9  -1    8.48    0.67
 -12 -10   1    0.95    0.45
 -12 -10   1    1.09    0.33
 -12 -10   1    0.76    0.26
 -12 -10   1    0.33    0.46
 -12  10   1   -0.21    0.52
 -12  10   1   -0.25    0.41
  12  10  -1    0.08    0.46
 -12  10   1    0.83    0.39
 -11 -10   1    0.08    0.39
 -11 -10   1   -0.48    0.41
 -11 -10   1    0.45    0.25
 -11 -10   1    0.46    0.31
 -11  10   1    0.14    0.47
 -11  10   1    0.28    0.35
 -11  10   1    0.33    0.37
  11  10  -1    0.43    0.39
 -10 -10   1    2.20    0.35
  10 -10  -1    2.81    0.41
 -10 -10   1    3.76    0.48
 -10 -10   1    2.98    0.42
 -10 -10   1    3.35    0.43
  10 -10  -1    3.35    0.50
 -10  10   1    2.89    0.50
  10  10  -1    2.80    0.46
 -10  10   1    2.24    0.37
 -10  10   1    2.39    0.51
 -10  10   1    2.16    0.36
  -9 -10   1    0.39    0.34
   9 -10  -1    0.32    0.28
   9 -10  -1    1.24    0.30
  -9 -10   1    0.52    0.34
  -9  10   1    0.74    0.32
  -9  10   1    0.39    0.33
  -9  10   1    0.11    0.32
  -9  10   1    0.27    0.41
  -8 -10   1   10.00    0.56
   8 -10  -1   10.50    0.48
  -8 -10   1    9.72    0.53
  -8 -10   1   10.63    0.46
  -8  10   1   10.02    0.55
  -8  10   1   10.94    0.72
  -8  10   1    9.38    0.49
  -8  10   1   10.79    0.65
   8  10  -1    9.70    0.50
  -7 -10   1    0.31    0.32
   7 -10  -1    0.73    0.29
   7 -10  -1    0.71    0.28
  -7 -10   1    0.61    0.25
  -7  10   1    0.75    0.34
  -7  10   1   -0.02    0.27
   7  10  -1    0.50    0.25
   7  10  -1    0.25    0.20
  -7  10   1    0.50    0.32
   7  10  -1    0.74    0.24
   6 -10  -1   -0.07    0.26
   6 -10  -1   -0.10    0.16
  -6 -10   1    0.50    0.40
  -6 -10   1    0.01    0.27
  -6 -10   1    0.44    0.24
   6 -10  -1    0.01    0.25
  -6  10   1    0.12    0.16
  -6  10   1    0.10    0.31
   6  10  -1   -0.10    0.21
  -6  10   1   -0.18    0.24
   6  10  -1    0.51    0.24
  -6  10   1   -0.09    0.27
   6  10  -1   -0.03    0.21
  -6  10   1   -0.16    0.30
  -5 -10   1    6.32    0.44
  -5 -10   1    5.52    0.44
  -5 -10   1    5.69    0.38
   5 -10  -1    5.86    0.39
   5 -10  -1    5.61    0.27
   5 -10  -1    6.30    0.44
   5  10  -1    5.79    0.36
   5  10  -1    5.63    0.41
  -5  10   1    5.51    0.46
   5  10  -1    5.76    0.32
  -5  10   1    5.88    0.39
  -4 -10   1    7.85    0.45
  -4 -10   1    7.35    0.40
  -4 -10   1    7.44    0.45
   4 -10  -1    8.10    0.41
   4 -10  -1    7.37    0.30
   4 -10  -1    7.09    0.45
  -4  10   1    7.69    0.81
   4  10  -1    7.49    0.32
   4  10  -1    7.14    0.43
  -4  10   1    7.48    0.47
  -4  10   1    7.66    0.40
  -3 -10   1    6.79    0.40
   3 -10  -1    6.14    0.28
   3 -10  -1    5.93    0.38
  -3 -10   1    6.24    0.37
  -3 -10   1    5.98    0.42
   3 -10  -1    5.87    0.43
   3  10  -1    5.97    0.35
  -3  10   1    6.13    0.36
   3  10  -1    5.74    0.41
  -3  10   1    6.18    0.42
   3  10  -1    6.22    0.29
  -3  10   1    6.15    0.41
   2 -10  -1    2.29    0.25
  -2 -10   1    2.18    0.26
   2 -10  -1    1.79    0.24
   2 -10  -1    2.07    0.29
  -2 -10   1    1.98    0.28
  -2 -10   1    2.18    0.31
   2  10  -1    2.39    0.23
  -2  10   1    2.32    0.31
  -2  10   1    1.76    0.25
   2  10  -1    1.99    0.29
  -2  10   1    2.35    0.30
   2  10  -1    2.14    0.28
   1 -10  -1    6.98    0.36
  -1 -10   1    7.88    0.37
  -1 -10   1    7.15    0.36
   1 -10  -1    7.61    0.32
   1 -10  -1    7.30    0.42
  -1 -10   1    6.95    0.42
  -1  10   1    6.92    0.42
  -1  10   1    6.93    0.36
  -1  10   1    6.87    0.32
   1  10  -1    6.95    0.23
   1  10  -1    7.39    0.42
   0 -10   1    0.49    0.20
   0 -10   1    0.31    0.26
   0 -10   1    0.74    0.21
   0 -10  -1    0.55    0.19
   0 -10  -1    0.49    0.26
   0 -10  -1    0.36    0.20
   0  10   1    0.28    0.24
   0  10   1    0.31    0.20
   0  10  -1    0.45    0.20
   0  10   1    0.23    0.15
   0  10  -1    0.43    0.25
   0  10  -1    0.50    0.16
  -1 -10  -1    0.53    0.26
   1 -10   1    0.43    0.25
   1 -10   1    0.38    0.18
   1 -10   1    0.57    0.22
  -1 -10  -1    0.40    0.20
  -1 -10  -1    0.44    0.20
  -1  10  -1    0.15    0.20
   1  10   1    0.51    0.12
   1  10   1    0.40    0.21
   1  10   1    0.54    0.25
  -1  10  -1    0.21    0.19
  -1  10  -1    0.75    0.25
  -2 -10  -1    2.62    0.37
   2 -10   1    2.01    0.25
  -2 -10  -1    2.14    0.31
   2 -10   1    1.82    0.28
  -2 -10  -1    2.11    0.32
   2 -10   1    1.82    0.26
  -2  10  -1    2.33    0.29
  -2  10  -1    2.34    0.29
   2  10   1    2.72    0.36
   2  10   1    2.55    0.38
  -2  10  -1    2.36    0.31
   2  10   1    2.13    0.25
  -3 -10  -1    3.54    0.41
  -3 -10  -1    3.19    0.33
  -3 -10  -1    2.79    0.36
   3 -10   1    2.84    0.40
   3 -10   1    3.61    0.36
   3 -10   1    2.95    0.27
  -3  10  -1    3.17    0.30
  -3  10  -1    3.38    0.41
   3  10   1    3.23    0.39
   3  10   1    2.89    0.29
  -3  10  -1    3.24    0.34
   4 -10   1    3.14    0.28
  -4 -10  -1    2.78    0.34
  -4 -10  -1    2.58    0.40
   4 -10   1    3.21    0.37
  -4 -10  -1    2.50    0.30
   4 -10   1    3.21    0.41
  -4  10  -1    3.23    0.29
  -4  10  -1    2.97    0.44
   4  10   1    2.54    0.39
   4  10   1    2.97    0.31
  -4  10  -1    3.27    0.42
   4  10   1    2.96    0.40
  -4  10  -1    2.60    0.35
   5 -10   1    3.28    0.41
  -5 -10  -1    3.19    0.44
   5 -10   1    3.43    0.39
  -5 -10  -1    2.79    0.34
  -5 -10  -1    2.70    0.40
   5 -10   1    3.11    0.29
   5  10   1    3.06    0.33
  -5  10  -1    2.97    0.43
  -5  10  -1    3.29    0.47
   5  10   1    2.69    0.33
   5  10   1    2.87    0.41
  -5  10  -1    2.60    0.36
  -5  10  -1    3.28    0.28
   6 -10   1    5.13    0.43
   6 -10   1    5.16    0.32
  -6 -10  -1    5.04    0.46
  -6 -10  -1    5.21    0.38
   6 -10   1    5.26    0.44
   6  10   1    5.86    0.43
  -6  10  -1    5.14    0.31
   6  10   1    5.16    0.39
  -6  10  -1    5.19    0.53
   6  10   1    5.83    0.39
  -6  10  -1    5.28    0.53
  -6  10  -1    5.44    0.41
  -7 -10  -1    3.39    0.37
   7 -10   1    3.00    0.31
   7 -10   1    3.55    0.44
   7 -10   1    3.08    0.34
  -7 -10  -1    2.93    0.44
  -7  10  -1    2.94    0.39
  -7  10  -1    2.66    0.28
   7  10   1    3.30    0.53
  -7  10  -1    3.86    0.42
   7  10   1    3.10    0.43
  -7  10  -1    3.48    0.47
   7  10   1    2.95    0.40
   8 -10   1    0.62    0.30
  -8 -10  -1    0.88    0.33
   8 -10   1    0.85    0.32
   8  10   1    0.63    0.24
  -8  10  -1    0.39    0.30
  -8  10  -1    0.50    0.29
  -8  10  -1    0.64    0.20
   8  10   1    0.49    0.27
   8  10   1    0.70    0.47
  -8  10  -1    0.43    0.31
   9 -10   1    0.81    0.32
   9 -10   1    0.70    0.32
  -9 -10  -1    1.14    0.31
  -9 -10  -1    0.90    0.28
  -9  10  -1    0.87    0.21
  -9  10  -1    0.51    0.34
   9  10   1    0.68    0.30
  -9  10  -1    0.75    0.41
  -9  10  -1    0.64    0.31
 -10 -10  -1    0.25    0.24
  10 -10   1    0.24    0.33
 -10 -10  -1    0.03    0.35
  10 -10   1    0.06    0.32
 -10 -10  -1    0.42    0.30
 -10  10  -1    0.35    0.41
 -10  10  -1    0.32    0.36
 -10  10  -1    0.40    0.34
 -10  10  -1    0.69    0.23
  10  10   1    0.54    0.35
  11 -10   1    0.83    0.34
 -11 -10  -1    0.97    0.21
 -11 -10  -1    0.42    0.27
 -11 -10  -1    1.25    0.40
 -11  10  -1    1.03    0.37
 -11  10  -1    0.61    0.49
  11  10   1    1.05    0.42
 -11  10  -1    1.00    0.25
 -11  10  -1    0.90    0.39
 -12 -10  -1    1.47    0.48
 -12 -10  -1    1.89    0.26
 -12 -10  -1    1.32    0.52
 -12 -10  -1    1.21    0.32
 -12  10  -1    0.73    0.49
 -12  10  -1    0.51    0.43
  12  10   1    1.00    0.75
 -12 -11   1    0.76    0.49
 -12 -11   1    1.15    0.49
 -12 -11   1    1.38    0.38
 -12  11   1    0.02    0.61
 -12  11   1    0.13    0.42
 -11 -11   1    2.84    0.37
 -11 -11   1    2.77    0.47
 -11 -11   1    2.87    0.51
 -11  11   1    2.58    0.45
 -11  11   1    2.41    0.42
 -11  11   1    2.77    0.57
  11  11  -1    2.65    0.46
  10 -11  -1    2.94    0.35
 -10 -11   1    2.49    0.35
 -10 -11   1    2.16    0.42
 -10 -11   1    3.05    0.46
 -10  11   1    2.40    0.47
 -10  11   1    2.81    0.39
  10  11  -1    3.05    0.40
 -10  11   1    2.40    0.40
  -9 -11   1    4.62    0.45
  -9 -11   1    5.04    0.52
   9 -11  -1    5.51    0.50
   9 -11  -1    4.17    0.47
  -9 -11   1    4.63    0.51
   9  11  -1    4.63    0.53
  -9  11   1    4.37    0.51
  -9  11   1    4.93    0.53
  -9  11   1    4.14    0.50
  -8 -11   1    1.14    0.28
   8 -11  -1    1.22    0.32
  -8 -11   1    1.16    0.35
   8 -11  -1    1.81    0.31
  -8 -11   1    0.83    0.34
  -8  11   1    1.26    0.36
  -8  11   1    1.33    0.39
  -8  11   1    1.37    0.33
   8  11  -1    1.62    0.30
  -7 -11   1   20.87    0.73
   7 -11  -1   20.15    0.67
  -7 -11   1   18.33    0.67
  -7 -11   1   18.80    0.84
   7 -11  -1   19.84    0.64
  -7  11   1   20.17    0.78
   7  11  -1   19.58    0.61
   7  11  -1   20.34    0.61
   7  11  -1   19.49    0.56
  -7  11   1   19.54    0.64
  -7  11   1   21.15    0.72
  -7  11   1   20.55    0.81
   6 -11  -1    5.59    0.45
   6 -11  -1    5.26    0.43
  -6 -11   1    4.87    0.44
  -6 -11   1    5.81    0.48
   6 -11  -1    5.60    0.29
  -6 -11   1    6.14    0.50
   6  11  -1    5.98    0.39
   6  11  -1    5.48    0.44
   6  11  -1    4.97    0.37
  -6  11   1    4.61    0.42
  -6  11   1    5.84    0.51
  -6  11   1    5.30    0.59
  -6  11   1    5.70    0.55
  -5 -11   1    0.78    0.26
  -5 -11   1    0.61    0.30
   5 -11  -1    0.88    0.28
   5 -11  -1    0.77    0.18
  -5 -11   1    0.79    0.44
  -5  11   1    0.80    0.44
  -5  11   1    0.74    0.34
   5  11  -1    0.38    0.21
   5  11  -1    0.90    0.29
   5  11  -1    0.63    0.35
  -5  11   1    0.45    0.25
   4 -11  -1    7.97    0.44
  -4 -11   1    6.86    0.42
   4 -11  -1    6.96    0.32
   4 -11  -1    6.94    0.48
  -4 -11   1    7.24    0.47
  -4 -11   1    6.95    0.49
  -4  11   1    7.81    0.49
  -4  11   1    6.49    0.42
   4  11  -1    6.98    0.46
   4  11  -1    6.94    0.39
  -4  11   1    8.05    0.49
   4  11  -1    7.16    0.34
   3 -11  -1    2.91    0.34
  -3 -11   1    2.69    0.39
   3 -11  -1    2.31    0.27
  -3 -11   1    2.86    0.37
  -3 -11   1    2.99    0.34
   3 -11  -1    3.23    0.38
   3  11  -1    2.29    0.35
   3  11  -1    2.66    0.28
   3  11  -1    2.77    0.43
  -3  11   1    2.77    0.36
  -3  11   1    2.76    0.30
  -3  11   1    2.51    0.39
  -2 -11   1    5.64    0.41
   2 -11  -1    6.03    0.41
  -2 -11   1    6.24    0.40
   2 -11  -1    5.31    0.46
  -2 -11   1    6.29    0.46
   2 -11  -1    5.79    0.32
  -2  11   1    6.35    0.46
   2  11  -1    5.98    0.39
  -2  11   1    5.93    0.39
   2  11  -1    5.82    0.31
  -2  11   1    5.44    0.38
   2  11  -1    5.71    0.45
  -1 -11   1   17.88    0.56
   1 -11  -1   18.02    0.56
   1 -11  -1   17.58    0.50
  -1 -11   1   17.69    0.55
  -1 -11   1   18.39    0.62
   1 -11  -1   18.47    0.62
   1  11  -1   18.22    0.55
   1  11  -1   17.23    0.61
  -1  11   1   18.17    0.55
  -1  11   1   17.76    0.62
  -1  11   1   17.01    0.50
   0 -11  -1    3.82    0.43
   0 -11   1    3.42    0.42
   0 -11  -1    4.01    0.36
   0 -11  -1    3.54    0.34
   0 -11   1    3.49    0.34
   0 -11   1    3.43    0.36
   0  11  -1    3.00    0.42
   0  11  -1    3.39    0.35
   0  11   1    2.88    0.34
   0  11   1    3.45    0.44
   0  11   1    3.29    0.26
  -1 -11  -1    3.57    0.43
   1 -11   1    4.74    0.40
   1 -11   1    3.99    0.34
  -1 -11  -1    3.80    0.37
   1 -11   1    4.17    0.43
  -1 -11  -1    4.49    0.36
   1  11   1    3.68    0.21
   1  11   1    4.07    0.37
  -1  11  -1    3.78    0.36
  -1  11  -1    4.49    0.45
   1  11   1    4.52    0.45
  -1  11  -1    3.38    0.33
   2 -11   1   13.36    0.51
   2 -11   1   12.39    0.44
  -2 -11  -1   13.35    0.50
  -2 -11  -1   12.88    0.55
   2 -11   1   13.91    0.55
  -2 -11  -1   13.35    0.50
   2  11   1   14.06    0.44
  -2  11  -1   12.75    0.56
   2  11   1   12.66    0.55
   2  11   1   13.24    0.48
  -2  11  -1   12.84    0.49
  -2  11  -1   13.15    0.49
  -3 -11  -1    0.49    0.26
   3 -11   1    0.69    0.22
   3 -11   1    0.31    0.30
   3 -11   1    0.95    0.27
  -3 -11  -1    0.43    0.31
  -3 -11  -1    0.62    0.25
  -3  11  -1    0.53    0.29
  -3  11  -1    0.66    0.24
   3  11   1    0.77    0.24
  -3  11  -1    0.46    0.25
   3  11   1    0.72    0.32
   3  11   1    0.88    0.22
   4 -11   1    0.55    0.20
   4 -11   1    1.05    0.30
  -4 -11  -1   -0.29    0.28
   4 -11   1    0.74    0.29
  -4 -11  -1    0.45    0.25
  -4 -11  -1    0.13    0.28
   4  11   1    0.64    0.22
  -4  11  -1    0.26    0.22
  -4  11  -1    0.44    0.26
  -4  11  -1    0.63    0.42
   4  11   1    0.73    0.31
  -4  11  -1    0.45    0.32
   5 -11   1    3.23    0.31
  -5 -11  -1    3.22    0.44
  -5 -11  -1    3.38    0.44
   5 -11   1    3.05    0.34
   5 -11   1    3.33    0.41
   5  11   1    3.73    0.45
  -5  11  -1    3.21    0.51
   5  11   1    3.20    0.36
  -5  11  -1    2.82    0.31
   5  11   1    3.58    0.37
  -5  11  -1    2.98    0.39
  -5  11  -1    3.14    0.45
  -6 -11  -1    2.34    0.36
  -6 -11  -1    2.68    0.36
   6 -11   1    3.37    0.35
   6 -11   1    2.25    0.31
   6 -11   1    2.49    0.35
  -6 -11  -1    2.64    0.35
   6  11   1    2.74    0.34
  -6  11  -1    2.39    0.44
  -6  11  -1    2.50    0.37
   6  11   1    3.28    0.45
  -6  11  -1    2.52    0.32
   6  11   1    2.40    0.36
  -6  11  -1    2.57    0.30
   7 -11   1    3.91    0.34
   7 -11   1    4.83    0.48
  -7 -11  -1    3.86    0.50
   7 -11   1    4.86    0.51
  -7 -11  -1    3.21    0.50
  -7 -11  -1    4.01    0.41
   7  11   1    4.03    0.45
   7  11   1    3.90    0.41
  -7  11  -1    4.00    0.45
  -7  11  -1    4.11    0.32
  -7  11  -1    4.78    0.52
  -7  11  -1    4.61    0.58
  -8 -11  -1    7.63    0.59
  -8 -11  -1    6.51    0.46
  -8 -11  -1    8.61    0.55
   8 -11   1    8.27    0.52
   8 -11   1    7.58    0.54
  -8  11  -1    7.73    0.36
  -8  11  -1    7.96    0.62
  -8  11  -1    6.88    0.56
  -8  11  -1    6.68    0.51
   8  11   1    7.17    0.51
   8  11   1    7.61    0.46
   9 -11   1    1.59    0.38
  -9 -11  -1    1.30    0.35
   9 -11   1    1.87    0.37
  -9 -11  -1    1.93    0.43
  -9 -11  -1    1.44    0.31
  -9  11  -1    1.63    0.39
  -9  11  -1    1.66    0.44
  -9  11  -1    1.82    0.25
   9  11   1    1.63    0.36
  -9  11  -1    1.77    0.43
  10 -11   1   -0.19    0.41
 -10 -11  -1    0.24    0.31
 -10 -11  -1    0.11    0.44
  10 -11   1    0.52    0.37
 -10 -11  -1    0.46    0.43
 -10  11  -1   -0.18    0.36
 -10  11  -1    0.52    0.41
 -10  11  -1   -0.09    0.23
 -10  11  -1    0.52    0.42
  10  11   1    0.25    0.40
  11 -11   1    8.23    0.57
 -11 -11  -1    7.00    0.70
 -11 -11  -1    5.42    0.70
  11 -11   1    8.74    0.61
 -11 -11  -1    7.60    0.53
 -11  11  -1    6.16    0.46
 -11  11  -1    6.21    0.67
 -11  11  -1    6.81    0.79
 -12 -11  -1    0.20    0.58
 -12 -11  -1   -0.37    0.57
 -12 -11  -1    0.60    0.35
 -12  11  -1    0.32    0.56
 -12  11  -1   -0.52    0.48
 -11 -12   1    0.54    0.36
 -11 -12   1    1.27    0.49
 -11  12   1    0.26    0.59
 -11  12   1    0.80    0.46
 -10 -12   1    0.51    0.47
 -10 -12   1    0.71    0.52
 -10 -12   1    1.27    0.35
  10 -12  -1    1.32    0.43
  10 -12  -1    0.20    0.35
 -10  12   1    2.08    0.45
 -10  12   1    0.90    0.39
  10  12  -1    1.13    0.44
   9 -12  -1    0.97    0.39
  -9 -12   1    1.10    0.34
  -9 -12   1    0.44    0.44
   9 -12  -1    0.27    0.36
  -9 -12   1    0.43    0.44
  -9  12   1    0.66    0.45
  -9  12   1    0.75    0.42
   9  12  -1    1.16    0.36
  -9  12   1   -0.02    0.34
  -9  12   1    0.82    0.60
  -8 -12   1    2.60    0.38
   8 -12  -1    2.74    0.39
  -8 -12   1    2.76    0.37
  -8 -12   1    2.21    0.42
   8 -12  -1    3.49    0.49
   8  12  -1    2.79    0.41
  -8  12   1    2.63    0.39
   8  12  -1    2.78    0.40
   8  12  -1    2.65    0.38
  -8  12   1    2.58    0.43
  -8  12   1    4.03    0.63
  -7 -12   1    2.08    0.37
   7 -12  -1    2.20    0.36
  -7 -12   1    1.79    0.33
  -7 -12   1    1.83    0.39
   7 -12  -1    1.70    0.34
  -7  12   1    1.86    0.41
   7  12  -1    2.39    0.37
   7  12  -1    2.21    0.34
  -7  12   1    1.90    0.35
   7  12  -1    2.36    0.28
  -7  12   1    2.43    0.42
  -7  12   1    2.10    0.54
   6 -12  -1    0.63    0.31
  -6 -12   1    0.79    0.37
   6 -12  -1    0.93    0.36
  -6 -12   1    1.09    0.31
   6 -12  -1    1.15    0.20
  -6 -12   1    0.91    0.35
  -6  12   1    1.27    0.37
   6  12  -1    0.91    0.26
   6  12  -1    0.92    0.33
  -6  12   1    1.18    0.40
  -6  12   1    0.77    0.39
  -6  12   1    0.59    0.29
   6  12  -1    1.32    0.27
   5 -12  -1    0.02    0.30
  -5 -12   1   -0.28    0.30
   5 -12  -1    0.06    0.19
  -5 -12   1   -0.35    0.32
   5 -12  -1   -0.01    0.30
  -5 -12   1   -0.08    0.25
  -5  12   1   -0.30    0.26
   5  12  -1    0.03    0.25
  -5  12   1   -0.34    0.31
  -5  12   1    0.22    0.34
   5  12  -1   -0.04    0.22
   5  12  -1   -0.31    0.32
  -4 -12   1    6.08    0.44
   4 -12  -1    5.66    0.45
   4 -12  -1    5.33    0.32
  -4 -12   1    5.88    0.51
  -4 -12   1    5.34    0.47
   4 -12  -1    5.71    0.49
  -4  12   1    5.61    0.43
   4  12  -1    5.83    0.49
  -4  12   1    4.90    0.47
   4  12  -1    5.38    0.39
   4  12  -1    5.51    0.34
  -4  12   1    6.06    0.52
   3 -12  -1    0.74    0.33
  -3 -12   1   -0.21    0.32
   3 -12  -1    0.61    0.31
   3 -12  -1    0.31    0.21
  -3 -12   1    0.59    0.29
  -3 -12   1    0.55    0.32
   3  12  -1    0.42    0.41
  -3  12   1    0.87    0.30
  -3  12   1    0.21    0.31
   3  12  -1    0.87    0.32
  -3  12   1    0.18    0.47
   3  12  -1    0.54    0.20
   2 -12  -1    2.33    0.37
  -2 -12   1    1.91    0.36
   2 -12  -1    1.74    0.36
  -2 -12   1    1.97    0.31
   2 -12  -1    1.87    0.24
   2  12  -1    2.71    0.38
   2  12  -1    2.23    0.36
   2  12  -1    2.38    0.29
  -2  12   1    1.42    0.27
  -2  12   1    1.78    0.38
   1 -12  -1   30.13    0.85
   1 -12  -1   29.35    0.92
  -1 -12   1   30.50    0.85
  -1 -12   1   31.63    0.78
   1 -12  -1   31.33    0.74
   1  12  -1   30.89    0.77
  -1  12   1   31.74    0.81
   1  12  -1   31.53    0.85
  -1  12   1   30.77    0.72
   0 -12   1   37.84    0.88
   0 -12   1   40.17    1.14
   0 -12  -1   38.07    0.87
   0  12   1   36.22    0.79
   0  12  -1   34.06    0.80
   0  12   1   38.97    0.90
   0  12   1   38.46    0.97
   0  12  -1   38.59    0.89
   0  12  -1   37.15    0.95
   1 -12   1    3.07    0.52
  -1 -12  -1    2.28    0.38
   1 -12   1    2.28    0.28
  -1 -12  -1    2.76    0.38
   1  12   1    1.90    0.17
  -1  12  -1    2.67    0.37
   1  12   1    2.25    0.36
  -1  12  -1    1.92    0.26
   1  12   1    2.55    0.30
  -1  12  -1    2.33    0.47
   2 -12   1    3.97    0.48
  -2 -12  -1    4.07    0.41
   2 -12   1    3.53    0.34
  -2 -12  -1    4.47    0.51
  -2 -12  -1    3.57    0.42
  -2  12  -1    3.32    0.41
   2  12   1    4.21    0.48
   2  12   1    4.72    0.56
   2  12   1    4.63    0.39
  -2  12  -1    3.79    0.50
   3 -12   1    2.61    0.36
   3 -12   1    2.74    0.58
  -3 -12  -1    2.79    0.39
  -3 -12  -1    2.68    0.41
   3 -12   1    2.26    0.32
  -3 -12  -1    2.33    0.34
   3  12   1    2.81    0.40
  -3  12  -1    2.61    0.39
  -3  12  -1    2.35    0.37
   3  12   1    3.10    0.36
   3  12   1    2.66    0.38
   4 -12   1    0.10    0.34
  -4 -12  -1   -0.10    0.27
   4 -12   1   -0.07    0.22
  -4 -12  -1   -0.02    0.33
   4 -12   1   -0.11    0.35
  -4  12  -1    0.27    0.32
   4  12   1    0.06    0.25
  -4  12  -1    0.32    0.38
  -4  12  -1    0.32    0.23
  -4  12  -1    0.21    0.31
   4  12   1    0.05    0.33
  -4  12  -1    0.23    0.34
  -5 -12  -1    0.65    0.32
  -5 -12  -1    0.14    0.35
   5 -12   1    0.60    0.38
   5 -12   1    0.06    0.31
  -5 -12  -1    0.17    0.28
   5 -12   1    0.36    0.22
  -5  12  -1    0.44    0.36
   5  12   1    0.25    0.34
  -5  12  -1    0.58    0.35
   5  12   1    0.16    0.30
  -5  12  -1    0.46    0.29
  -5  12  -1    0.50    0.25
   5  12   1    0.78    0.27
   6 -12   1   14.32    0.48
  -6 -12  -1   14.04    0.64
  -6 -12  -1   14.90    0.58
   6 -12   1   15.87    0.65
   6 -12   1   14.85    0.62
  -6 -12  -1   14.14    0.62
   6  12   1   14.65    0.54
   6  12   1   15.06    0.54
  -6  12  -1   14.69    0.66
  -6  12  -1   15.58    0.74
  -6  12  -1   14.52    0.49
  -6  12  -1   14.06    0.60
   6  12   1   15.08    0.61
   7 -12   1    3.81    0.51
  -7 -12  -1    3.43    0.43
  -7 -12  -1    4.16    0.45
  -7 -12  -1    3.92    0.55
   7 -12   1    4.62    0.36
   7 -12   1    4.77    0.53
  -7  12  -1    4.37    0.34
   7  12   1    4.60    0.42
   7  12   1    4.17    0.50
  -7  12  -1    4.40    0.58
  -7  12  -1    3.69    0.47
   7  12   1    3.45    0.48
  -7  12  -1    3.40    0.50
   8 -12   1    3.14    0.47
  -8 -12  -1    3.99    0.45
  -8 -12  -1    4.13    0.56
   8 -12   1    3.59    0.40
  -8 -12  -1    3.22    0.36
   8  12   1    3.41    0.49
  -8  12  -1    2.88    0.43
  -8  12  -1    2.90    0.41
  -8  12  -1    3.37    0.34
   8  12   1    3.75    0.49
   8  12   1    3.33    0.48
  -8  12  -1    3.97    0.65
  -9 -12  -1    0.00    0.41
  -9 -12  -1    0.94    0.41
  -9 -12  -1    0.60    0.31
   9 -12   1    0.81    0.37
  -9  12  -1    0.19    0.54
   9  12   1    1.14    0.38
  -9  12  -1    0.89    0.24
  -9  12  -1    0.75    0.45
  -9  12  -1    0.01    0.40
  -9  12  -1    0.02    0.40
   9  12   1    1.13    0.32
 -10 -12  -1   -0.18    0.51
  10 -12   1    0.07    0.41
  10 -12   1    0.13    0.43
 -10 -12  -1    0.03    0.36
 -10 -12  -1    1.62    0.46
 -10  12  -1    0.91    0.49
 -10  12  -1    0.58    0.24
 -10  12  -1    0.18    0.45
  10  12   1    0.48    0.42
  11 -12   1    1.40    0.44
 -11 -12  -1    1.63    0.49
 -11 -12  -1    1.10    0.38
 -11  12  -1    1.06    0.48
  11  12   1    0.82    0.49
 -11  12  -1    0.97    0.53
 -10 -13   1    1.31    0.69
 -10 -13   1    2.50    0.50
  10 -13  -1    2.47    0.45
  10 -13  -1    2.21    0.52
 -10 -13   1    1.82    0.42
 -10  13   1    3.33    0.49
  -9 -13   1    2.35    0.50
  -9 -13   1    3.08    0.39
   9 -13  -1    2.57    0.49
  -9 -13   1    2.16    0.54
  -9  13   1    2.38    0.47
  -9  13   1    2.16    0.53
  -8 -13   1    5.09    0.61
  -8 -13   1    5.28    0.53
   8 -13  -1    5.72    0.57
  -8 -13   1    4.06    0.51
   8 -13  -1    5.38    0.59
  -8  13   1    3.71    0.48
  -8  13   1    4.94    0.64
  -8  13   1    5.84    0.71
   8  13  -1    5.49    0.58
   8  13  -1    5.89    0.48
  -8  13   1    6.24    0.74
  -7 -13   1    0.21    0.32
   7 -13  -1    0.79    0.33
   7 -13  -1    0.04    0.35
  -7 -13   1    0.52    0.38
  -7 -13   1    0.04    0.40
  -7  13   1    0.27    0.41
   7  13  -1    0.41    0.29
  -7  13   1    0.62    0.43
  -7  13   1   -0.12    0.36
   7  13  -1    0.20    0.36
   7  13  -1    0.29    0.33
  -6 -13   1    3.29    0.39
  -6 -13   1    3.03    0.46
  -6 -13   1    3.54    0.53
   6 -13  -1    3.92    0.51
   6 -13  -1    3.13    0.38
   6 -13  -1    3.65    0.32
   6  13  -1    3.71    0.51
  -6  13   1    3.00    0.37
   6  13  -1    2.96    0.31
  -6  13   1    3.50    0.43
  -6  13   1    2.90    0.44
   6  13  -1    3.84    0.42
  -5 -13   1    0.05    0.31
   5 -13  -1    0.77    0.42
  -5 -13   1    0.09    0.39
   5 -13  -1    0.17    0.21
   5 -13  -1   -0.17    0.32
  -5 -13   1   -0.13    0.31
   5  13  -1    0.01    0.23
   5  13  -1   -0.07    0.28
   5  13  -1    0.27    0.35
  -5  13   1    0.46    0.37
  -5  13   1    0.13    0.38
  -5  13   1   -0.04    0.38
  -5  13   1    0.09    0.31
   4 -13  -1    3.77    0.47
  -4 -13   1    3.65    0.43
  -4 -13   1    3.26    0.49
   4 -13  -1    4.04    0.51
  -4 -13   1    4.27    0.46
   4 -13  -1    3.75    0.33
   4  13  -1    4.09    0.36
   4  13  -1    3.63    0.42
   4  13  -1    3.63    0.51
  -4  13   1    3.37    0.35
  -4  13   1    3.65    0.49
  -4  13   1    3.93    0.54
  -3 -13   1    6.39    0.56
   3 -13  -1    7.99    0.54
  -3 -13   1    7.83    0.50
   3 -13  -1    8.20    0.49
  -3 -13   1    7.48    0.50
   3 -13  -1    7.07    0.37
   3  13  -1    7.49    0.45
   3  13  -1    7.68    0.39
  -3  13   1    7.56    0.48
  -3  13   1    7.78    0.57
   3  13  -1    7.34    0.55
   2 -13  -1    0.49    0.33
  -2 -13   1    0.23    0.31
   2 -13  -1    0.02    0.28
  -2 -13   1    0.05    0.35
  -2 -13   1    0.36    0.29
   2 -13  -1    0.02    0.23
   2  13  -1    0.10    0.21
  -2  13   1   -0.35    0.34
   2  13  -1    0.56    0.27
  -2  13   1   -0.39    0.25
   2  13  -1   -0.49    0.56
  -1 -13   1    1.26    0.31
  -1 -13   1    1.20    0.30
   1 -13  -1    0.81    0.27
   1 -13  -1    1.32    0.31
  -1  13   1    0.89    0.23
   1  13  -1    0.64    0.35
   1  13  -1    0.49    0.25
  -1  13   1    0.74    0.35
   0 -13  -1    7.35    0.43
   0 -13   1    7.78    0.45
   0 -13  -1    6.98    0.48
   0 -13   1    7.85    0.49
   0  13  -1    6.45    0.45
   0  13  -1    6.77    0.54
   0  13   1    6.98    0.45
   0  13   1    6.90    0.31
   0  13  -1    6.61    0.32
   0  13   1    7.08    0.55
  -1 -13  -1    0.57    0.30
  -1 -13  -1    0.72    0.29
   1 -13   1    0.43    0.26
   1 -13   1    0.77    0.30
  -1  13  -1    0.66    0.29
  -1  13  -1    0.12    0.24
  -1  13  -1    0.37    0.33
   1  13   1    0.33    0.29
   1  13   1    0.61    0.37
  -2 -13  -1   -0.15    0.37
  -2 -13  -1    0.01    0.29
   2 -13   1    0.30    0.30
   2 -13   1   -0.14    0.24
  -2 -13  -1   -0.50    0.26
   2  13   1    0.46    0.37
  -2  13  -1   -0.47    0.26
  -2  13  -1   -0.42    0.34
   2  13   1   -0.17    0.28
  -3 -13  -1    0.12    0.31
  -3 -13  -1    0.00    0.30
   3 -13   1    0.39    0.31
   3 -13   1    0.27    0.24
  -3 -13  -1    0.46    0.38
  -3  13  -1    0.51    0.36
   3  13   1    0.53    0.26
   3  13   1    0.09    0.36
  -3  13  -1    0.09    0.32
  -4 -13  -1    0.75    0.33
   4 -13   1    1.18    0.33
  -4 -13  -1    0.76    0.41
  -4 -13  -1    0.99    0.32
   4 -13   1    0.93    0.25
   4  13   1    0.87    0.29
  -4  13  -1    0.87    0.35
  -4  13  -1    0.84    0.68
  -4  13  -1    0.51    0.36
   4  13   1    0.80    0.28
  -5 -13  -1    5.41    0.57
   5 -13   1    5.33    0.50
  -5 -13  -1    5.56    0.48
   5 -13   1    5.66    0.38
  -5 -13  -1    5.64    0.52
   5  13   1    5.55    0.46
  -5  13  -1    5.76    0.54
   5  13   1    5.54    0.55
  -5  13  -1    6.08    0.63
  -5  13  -1    5.19    0.58
  -5  13  -1    5.84    0.52
  -6 -13  -1   -0.29    0.31
   6 -13   1    0.05    0.33
  -6 -13  -1    0.27    0.40
  -6 -13  -1    0.75    0.34
   6 -13   1    0.38    0.24
   6  13   1   -0.07    0.36
  -6  13  -1    0.42    0.41
  -6  13  -1    0.46    0.38
   6  13   1   -0.05    0.28
   6  13   1    0.33    0.30
  -6  13  -1    0.04    0.26
  -6  13  -1    0.15    0.37
  -6  13  -1    0.22    0.38
   7 -13   1   -0.15    0.35
  -7 -13  -1   -0.27    0.44
  -7 -13  -1    0.42    0.44
   7 -13   1    0.31    0.25
  -7 -13  -1   -0.17    0.32
  -7  13  -1   -0.09    0.42
   7  13   1    0.38    0.38
  -7  13  -1   -0.01    0.46
  -7  13  -1    0.48    0.26
  -7  13  -1   -0.52    0.35
   7  13   1    0.45    0.30
   7  13   1    0.19    0.32
  -8 -13  -1    3.79    0.46
  -8 -13  -1    4.80    0.66
  -8 -13  -1    4.15    0.52
   8 -13   1    4.06    0.46
   8  13   1    3.82    0.51
  -8  13  -1    4.28    0.73
  -8  13  -1    4.94    0.70
  -8  13  -1    3.44    0.39
   8  13   1    4.36    0.54
   8  13   1    3.99    0.58
  -8  13  -1    3.23    0.53
  -9 -13  -1    0.53    0.43
  -9 -13  -1    1.07    0.38
  -9 -13  -1    0.25    0.47
   9 -13   1    0.22    0.43
  -9  13  -1    0.69    0.50
  -9  13  -1    1.36    0.46
   9  13   1    1.06    0.36
  -9  13  -1    0.70    0.27
 -10 -13  -1    5.24    0.71
 -10 -13  -1    5.09    0.58
  10 -13   1    4.74    0.65
 -10  13  -1    4.75    0.74
 -10  13  -1    6.78    0.83
  10  13   1    6.20    0.72
  -9 -14   1    1.55    0.40
   9 -14  -1    0.57    0.40
  -9 -14   1   -0.05    0.50
  -9  14   1   -0.03    0.60
  -9  14   1   -0.19    0.56
   8 -14  -1    0.26    0.54
   8 -14  -1    0.59    0.39
  -8 -14   1    0.15    0.45
  -8 -14   1    0.42    0.38
  -8  14   1   -0.34    0.55
  -8  14   1    0.08    0.48
   8  14  -1    0.81    0.38
  -8  14   1    0.81    0.46
   8  14  -1   -0.02    0.36
   8  14  -1    0.41    0.37
  -7 -14   1    2.68    0.41
  -7 -14   1    3.35    0.47
   7 -14  -1    3.03    0.51
   7 -14  -1    2.49    0.40
  -7 -14   1    2.12    0.48
   7  14  -1    3.18    0.42
   7  14  -1    2.54    0.37
  -7  14   1    2.54    0.55
  -7  14   1    3.21    0.50
  -7  14   1    3.57    0.53
  -6 -14   1    1.13    0.38
   6 -14  -1    0.71    0.24
   6 -14  -1   -0.31    0.35
  -6 -14   1    0.99    0.36
   6 -14  -1    0.86    0.32
  -6 -14   1    0.08    0.46
   6  14  -1    0.55    0.42
  -6  14   1    0.46    0.46
  -6  14   1    0.36    0.43
  -6  14   1    0.24    0.53
   6  14  -1    0.34    0.38
  -6  14   1   -0.65    0.36
   6  14  -1    0.78    0.31
   5 -14  -1    0.97    0.36
  -5 -14   1    0.60    0.40
   5 -14  -1    1.16    0.24
  -5 -14   1    0.80    0.48
  -5 -14   1    1.32    0.35
   5 -14  -1    0.10    0.38
  -5  14   1    0.99    0.42
   5  14  -1    1.17    0.30
  -5  14   1    1.31    0.42
   5  14  -1    0.69    0.31
  -5  14   1    1.36    0.33
  -5  14   1    0.52    0.35
   4 -14  -1    1.07    0.33
   4 -14  -1    1.21    0.25
  -4 -14   1    0.79    0.38
  -4 -14   1    0.90    0.34
  -4 -14   1    0.51    0.44
   4  14  -1    1.06    0.30
  -4  14   1    0.82    0.36
  -4  14   1    1.05    0.43
   4  14  -1    0.62    0.38
  -4  14   1    0.25    0.34
   4  14  -1    0.85    0.30
   3 -14  -1   -0.25    0.24
  -3 -14   1    0.40    0.33
   3 -14  -1   -0.23    0.36
   3 -14  -1    0.27    0.28
  -3 -14   1    0.70    0.43
  -3 -14   1    0.62    0.39
  -3  14   1    0.04    0.51
  -3  14   1    0.59    0.38
   3  14  -1    0.26    0.40
   3  14  -1    0.68    0.28
  -2 -14   1    2.05    0.44
   2 -14  -1    1.96    0.36
  -2 -14   1    2.30    0.34
   2 -14  -1    2.15    0.30
  -2 -14   1    2.39    0.35
   2  14  -1    2.55    0.42
  -2  14   1    1.75    0.42
   2  14  -1    2.45    0.35
  -2  14   1    1.83    0.31
  -1 -14   1   14.88    0.84
  -1 -14   1   17.03    0.65
   1 -14  -1   17.16    0.57
   1 -14  -1   18.19    0.66
   1  14  -1   17.24    0.71
  -1  14   1   18.60    0.73
  -1  14   1   16.72    0.52
   0 -14  -1    6.67    0.51
   0 -14   1    7.32    0.53
   0 -14  -1    6.35    0.46
   0 -14   1    7.31    0.46
   0  14   1    6.80    0.58
   0  14  -1    6.61    0.58
   0  14   1    6.30    0.31
   0  14  -1    5.52    0.32
  -1 -14  -1   -0.06    0.29
   1 -14   1   -0.31    0.33
   1 -14   1   -0.40    0.27
  -1 -14  -1   -0.16    0.33
  -1  14  -1   -0.23    0.25
  -1  14  -1   -0.32    0.39
   1  14   1    0.14    0.26
   1  14   1    0.07    0.37
   2 -14   1    0.80    0.28
  -2 -14  -1    0.61    0.37
   2 -14   1    0.70    0.33
  -2 -14  -1    0.94    0.33
  -2 -14  -1    1.12    0.33
  -2  14  -1    0.88    0.40
   2  14   1    1.06    0.26
   2  14   1    0.68    0.38
   3 -14   1   -0.22    0.33
  -3 -14  -1   -0.39    0.32
  -3 -14  -1    0.11    0.34
   3 -14   1   -0.10    0.26
  -3 -14  -1   -0.05    0.43
   3 -14   1   -0.02    0.38
  -3  14  -1   -0.87    0.54
   3  14   1    0.09    0.25
   3  14   1   -0.08    0.40
  -3  14  -1    0.70    0.37
  -4 -14  -1    0.39    0.36
   4 -14   1    0.06    0.26
  -4 -14  -1    0.10    0.36
  -4 -14  -1   -0.14    0.42
   4 -14   1   -0.19    0.40
   4 -14   1   -0.27    0.36
  -4  14  -1   -0.05    0.40
  -4  14  -1    0.48    0.34
   4  14   1   -0.42    0.41
  -4  14  -1    0.01    0.33
   4  14   1   -0.06    0.28
  -4  14  -1    0.18    0.39
   5 -14   1    0.26    0.26
  -5 -14  -1    0.34    0.46
  -5 -14  -1    0.32    0.35
   5 -14   1   -0.36    0.34
  -5 -14  -1    0.50    0.36
   5 -14   1    0.22    0.42
  -5  14  -1   -0.19    0.41
   5  14   1    0.50    0.28
  -5  14  -1   -0.17    0.39
   5  14   1    0.22    0.27
   5  14   1    0.01    0.39
  -5  14  -1   -0.06    0.38
  -5  14  -1    0.21    0.43
  -6 -14  -1    1.58    0.41
   6 -14   1    1.46    0.46
   6 -14   1    1.03    0.39
   6 -14   1    1.55    0.29
  -6 -14  -1    1.18    0.44
  -6 -14  -1    1.02    0.37
   6  14   1    0.70    0.34
  -6  14  -1    2.00    0.46
   6  14   1    1.75    0.33
  -6  14  -1    0.64    0.52
  -6  14  -1    1.91    0.44
   6  14   1    1.45    0.43
   7 -14   1    0.45    0.27
  -7 -14  -1    0.12    0.36
  -7 -14  -1    0.50    0.61
  -7 -14  -1    1.32    0.39
   7 -14   1    0.78    0.52
   7 -14   1    0.26    0.41
   7  14   1    0.23    0.36
  -7  14  -1    0.52    0.56
  -7  14  -1    0.53    0.45
   7  14   1    0.43    0.35
  -7  14  -1    0.73    0.48
   8 -14   1    1.48    0.50
   8 -14   1    1.66    0.48
  -8 -14  -1    2.08    0.43
  -8 -14  -1    2.64    0.44
   8  14   1    1.97    0.43
  -8  14  -1    1.70    0.64
  -8  14  -1    2.80    0.46
   8  14   1    2.48    0.41
  -8  14  -1    1.05    0.54
   8  14   1    1.60    0.39
  -9 -14  -1    1.34    0.42
   9 -14   1   -0.40    0.59
  -9 -14  -1    0.23    0.49
   9 -14   1    1.51    0.46
  -9  14  -1    1.34    0.52
  -9  14  -1    1.09    0.59
   9  14   1    1.33    0.43
   9  14   1    2.46    0.48
   8 -15  -1    0.39    0.44
  -8 -15   1    0.08    0.44
   8 -15  -1    0.30    0.61
  -8  15   1   -0.09    0.59
  -8  15   1    0.92    0.55
   8  15  -1    1.14    0.43
  -7 -15   1    0.03    0.48
   7 -15  -1    0.49    0.52
  -7 -15   1    0.47    0.45
   7 -15  -1   -0.04    0.43
  -7  15   1    0.39    0.56
   7  15  -1    0.35    0.42
   7  15  -1   -0.51    0.53
  -7  15   1    0.79    0.49
  -7  15   1   -0.32    0.53
  -6 -15   1    6.25    0.62
   6 -15  -1    5.24    0.60
  -6 -15   1    5.47    0.66
   6 -15  -1    6.08    0.73
   6 -15  -1    6.69    0.40
  -6  15   1    6.78    0.78
   6  15  -1    5.01    0.52
   6  15  -1    6.56    0.56
   6  15  -1    6.16    0.64
  -6  15   1    7.05    0.72
  -5 -15   1   -0.12    0.42
   5 -15  -1    0.35    0.42
  -5 -15   1    1.37    0.38
   5 -15  -1    0.91    0.39
   5 -15  -1    1.11    0.27
  -5  15   1    0.03    0.49
   5  15  -1    0.68    0.31
  -5  15   1    0.69    0.41
   5  15  -1    1.07    0.43
  -5  15   1    0.98    0.50
   4 -15  -1    2.38    0.42
   4 -15  -1    2.69    0.30
  -4 -15   1    1.68    0.62
  -4 -15   1    3.20    0.41
   4 -15  -1    1.81    0.44
  -4 -15   1    1.88    0.43
   4  15  -1    2.71    0.48
  -4  15   1    2.74    0.48
  -4  15   1    2.45    0.42
   4  15  -1    2.57    0.42
  -3 -15   1   -0.01    0.46
   3 -15  -1    0.23    0.28
   3 -15  -1    0.45    0.40
  -3 -15   1   -0.39    0.41
  -3 -15   1    0.61    0.37
   3 -15  -1   -0.03    0.47
   3  15  -1    0.25    0.42
   3  15  -1    0.83    0.28
  -3  15   1    0.85    0.34
  -3  15   1   -0.17    0.35
  -3  15   1   -0.07    0.45
   2 -15  -1   13.34    0.65
  -2 -15   1   12.37    0.74
  -2 -15   1   12.52    0.64
  -2 -15   1   12.65    0.61
   2 -15  -1   12.22    0.51
   2 -15  -1   10.81    0.72
  -2  15   1   13.50    0.72
   2  15  -1   12.94    0.69
   2  15  -1   11.91    0.52
   1 -15  -1    4.18    0.56
  -1 -15   1    3.92    0.53
  -1 -15   1    2.13    0.49
   1 -15  -1    3.55    0.43
  -1 -15   1    3.48    0.48
   1  15  -1    3.55    0.53
  -1  15   1    3.88    0.39
   1  15  -1    4.49    0.60
  -1  15   1    4.16    0.62
   1  15  -1    3.79    0.41
   0 -15  -1    1.55    0.39
   0 -15  -1    1.26    0.36
   0 -15   1    1.37    0.35
   0 -15   1    1.47    0.40
   0  15  -1    1.47    0.41
   0  15   1    1.15    0.37
   0  15   1    1.77    0.44
   0  15  -1    1.66    0.42
   0  15   1    1.21    0.20
   0  15  -1    0.99    0.20
   1 -15   1    7.03    0.59
  -1 -15  -1    7.83    0.58
  -1 -15  -1    6.81    0.53
  -1  15  -1    6.62    0.42
   1  15   1    8.35    0.65
   1  15   1    7.21    0.48
  -1  15  -1    6.01    0.56
   1  15   1    6.34    0.56
  -1  15  -1    8.06    0.62
  -2 -15  -1    2.73    0.42
   2 -15   1    2.07    0.39
  -2 -15  -1    2.39    0.38
   2 -15   1    2.39    0.34
   2 -15   1    1.26    0.46
  -2 -15  -1    2.60    0.52
  -2  15  -1    2.98    0.46
   2  15   1    2.53    0.46
  -2  15  -1    2.41    0.38
   2  15   1    2.07    0.32
   2  15   1    2.04    0.53
   3 -15   1    0.45    0.45
   3 -15   1    0.26    0.29
   3 -15   1    0.51    0.36
  -3 -15  -1    0.32    0.36
  -3 -15  -1    0.66    0.39
  -3 -15  -1   -0.05    0.46
  -3  15  -1    0.19    0.33
   3  15   1    0.37    0.35
  -3  15  -1   -0.55    0.33
   3  15   1    0.52    0.41
  -3  15  -1    0.66    0.45
   3  15   1    0.68    0.30
  -3  15  -1    1.08    0.45
  -4 -15  -1    4.70    0.55
   4 -15   1    3.96    0.44
  -4 -15  -1    3.93    0.56
   4 -15   1    4.14    0.62
   4 -15   1    4.00    0.59
   4  15   1    4.61    0.49
  -4  15  -1    4.13    0.64
   4  15   1    4.17    0.61
  -4  15  -1    4.70    0.67
  -4  15  -1    3.95    0.58
   5 -15   1   -0.08    0.51
  -5 -15  -1    1.04    0.43
  -5 -15  -1    0.52    0.39
   5 -15   1    0.96    0.40
   5 -15   1    1.07    0.29
   5  15   1    0.87    0.34
  -5  15  -1    0.83    0.47
   5  15   1    0.95    0.46
   5  15   1    1.29    0.34
  -5  15  -1    0.10    0.49
  -5  15  -1    1.64    0.40
   6 -15   1    3.78    0.60
   6 -15   1    5.40    0.44
  -6 -15  -1    4.39    0.65
   6 -15   1    3.56    0.48
  -6 -15  -1    4.48    0.60
   6  15   1    3.81    0.50
  -6  15  -1    3.36    0.61
  -6  15  -1    4.80    0.76
   6  15   1    3.91    0.56
   7 -15   1    0.94    0.57
  -7 -15  -1    0.56    0.40
  -7 -15  -1    0.82    0.46
   7 -15   1    0.99    0.31
   7 -15   1    0.13    0.45
  -7  15  -1   -0.03    0.55
   7  15   1   -0.11    0.46
  -7  15  -1    2.53    0.62
   7  15   1    1.12    0.39
  -7  15  -1    1.17    0.50
  -8 -15  -1    0.87    0.47
  -8 -15  -1    0.26    0.55
   8 -15   1    0.21    0.72
   8 -15   1    0.03    0.52
   8  15   1    0.37    0.57
   8  15   1    0.75    0.49
  -8  15  -1    0.34    0.59
  -7 -16   1    1.63    0.52
  -7 -16   1    0.98    0.52
   7 -16  -1    0.77    0.48
   7  16  -1    1.20    0.50
  -7  16   1    1.05    0.62
  -7  16   1   -0.22    0.61
  -7  16   1    1.85    0.67
  -6 -16   1    0.80    0.46
  -6 -16   1   -0.08    0.47
   6 -16  -1   -0.44    0.45
   6 -16  -1    0.52    0.31
  -6  16   1    0.68    0.58
   6  16  -1    0.54    0.46
  -6  16   1    1.37    0.56
   6  16  -1    1.32    0.47
  -6  16   1    0.23    0.58
  -5 -16   1    3.16    0.47
   5 -16  -1    3.13    0.47
   5 -16  -1    2.94    0.42
  -5 -16   1    2.68    0.53
  -5  16   1    2.29    0.57
  -5  16   1    2.43    0.58
   5  16  -1    2.34    0.50
   5  16  -1    2.35    0.52
  -5  16   1    2.87    0.57
   5  16  -1    1.82    0.55
  -4 -16   1   -0.27    0.48
   4 -16  -1    0.84    0.44
  -4 -16   1    0.68    0.45
   4 -16  -1    1.19    0.31
   4  16  -1    1.03    0.43
  -4  16   1    0.29    0.53
   4  16  -1    0.88    0.37
  -4  16   1    1.13    0.45
   4  16  -1    0.79    0.47
  -3 -16   1    1.15    0.40
  -3 -16   1    1.27    0.44
   3 -16  -1    1.11    0.30
   3 -16  -1    0.59    0.47
   3  16  -1    0.87    0.48
  -3  16   1    1.75    0.49
  -3  16   1    1.54    0.39
   3  16  -1    0.81    0.43
   3  16  -1    1.26    0.32
  -2 -16   1    0.50    0.40
   2 -16  -1    1.43    0.43
  -2 -16   1    0.53    0.42
   2 -16  -1    0.79    0.31
   2  16  -1    1.06    0.41
  -2  16   1    0.67    0.47
  -2  16   1    0.89    0.33
   2  16  -1    0.70    0.33
   2  16  -1    0.33    0.49
   1 -16  -1    3.68    0.56
  -1 -16   1    3.91    0.48
  -1 -16   1    4.25    0.53
   1 -16  -1    4.61    0.60
  -1  16   1    3.62    0.55
   1  16  -1    3.81    0.48
   1  16  -1    3.86    0.47
  -1  16   1    3.88    0.41
   1  16  -1    4.58    0.65
   0 -16  -1    1.10    0.42
   0 -16   1    1.07    0.35
   0 -16  -1    1.47    0.35
   0 -16   1    2.02    0.43
   0  16   1    1.38    0.50
   0  16  -1    1.99    0.50
  -1 -16  -1    1.91    0.37
   1 -16   1    1.59    0.44
  -1 -16  -1    1.94    0.42
   1 -16   1    0.96    0.34
  -1  16  -1    3.14    0.48
   1  16   1    1.93    0.50
  -1  16  -1    1.82    0.30
   1  16   1    1.83    0.32
  -2 -16  -1    1.84    0.42
   2 -16   1    0.62    0.49
   2 -16   1    2.10    0.35
  -2 -16  -1    2.33    0.40
  -2  16  -1    1.53    0.52
   2  16   1    1.30    0.40
   2  16   1    1.54    0.36
   2  16   1    2.40    0.53
   3 -16   1    2.82    0.45
   3 -16   1    1.70    0.39
  -3 -16  -1    1.72    0.47
  -3 -16  -1    2.66    0.45
  -3  16  -1    2.78    0.44
  -3  16  -1    2.94    0.51
   3  16   1    2.01    0.46
  -3  16  -1    2.55    0.50
   3  16   1    3.23    0.50
   3  16   1    2.42    0.53
  -4 -16  -1   -0.10    0.42
  -4 -16  -1    0.20    0.44
   4 -16   1    0.24    0.31
   4 -16   1    0.03    0.45
   4  16   1    0.52    0.34
  -4  16  -1    0.61    0.50
  -4  16  -1    0.38    0.50
   4  16   1    0.72    0.44
   4  16   1   -0.04    0.47
  -4  16  -1   -0.65    0.47
  -5 -16  -1    2.54    0.50
   5 -16   1    1.50    0.45
   5 -16   1    1.84    0.34
  -5 -16  -1    2.30    0.48
   5  16   1    1.63    0.39
  -5  16  -1    2.62    0.59
  -5  16  -1    2.65    0.58
   5  16   1    2.63    0.53
  -5  16  -1    0.96    0.56
   5  16   1    2.78    0.45
   6 -16   1    0.75    0.47
  -6 -16  -1   -0.20    0.51
   6 -16   1    0.98    0.33
  -6 -16  -1    0.46    0.45
  -6  16  -1   -0.50    0.52
  -6  16  -1    0.39    0.60
   6  16   1    0.29    0.47
   6  16   1    0.25    0.45
  -6  16  -1    0.05    0.58
   6  16   1    0.74    0.52
  -7 -16  -1   -0.20    0.47
  -7 -16  -1    0.16    0.55
  -7  16  -1   -0.80    0.70
  -7  16  -1    0.45    0.66
  -7  16  -1   -0.50    0.88
   7  16   1    1.56    0.50
   7  16   1    0.22    0.54
   5 -17  -1    0.63    0.51
  -5 -17   1   -0.01    0.54
  -5 -17   1    0.08    0.58
  -5  17   1    0.52    0.61
   5  17  -1    0.66    0.57
   5  17  -1    0.60    0.54
  -4 -17   1    0.08    0.46
  -4 -17   1   -0.28    0.48
   4 -17  -1    0.30    0.33
   4 -17  -1   -0.31    0.47
   4  17  -1    1.08    0.57
  -4  17   1    0.61    0.57
  -4  17   1    0.51    0.56
  -3 -17   1    0.94    0.47
   3 -17  -1   -0.32    0.48
   3 -17  -1    0.26    0.35
  -3 -17   1    0.47    0.42
  -3  17   1    0.21    0.60
   3  17  -1    0.21    0.41
  -3  17   1    0.86    0.49
   3  17  -1    1.56    0.53
  -2 -17   1    0.58    0.40
   2 -17  -1    0.93    0.36
   2 -17  -1    1.07    0.46
  -2 -17   1    0.21    0.48
   2  17  -1    1.55    0.53
   2  17  -1    1.10    0.35
  -2  17   1    0.04    0.56
   1 -17  -1    0.39    0.36
  -1 -17   1    0.03    0.48
  -1 -17   1    0.05    0.42
   1 -17  -1    0.15    0.47
  -1  17   1    0.82    0.53
   1  17  -1    0.44    0.50
   0 -17  -1    1.84    0.41
   0 -17   1    2.75    0.52
   0 -17   1    1.69    0.38
   0 -17  -1    2.11    0.49
   0  17   1    1.89    0.54
   0  17  -1    2.48    0.54
  -1 -17  -1    0.76    0.44
   1 -17   1    0.59    0.36
   1 -17   1   -0.17    0.46
  -1 -17  -1    0.87    0.40
  -1  17  -1   -0.37    0.51
   1  17   1    1.07    0.52
   1  17   1    0.55    0.58
   2 -17   1   -0.50    0.47
  -2 -17  -1    0.73    0.42
  -2 -17  -1    0.53    0.44
   2 -17   1    0.90    0.35
   2  17   1    1.79    0.54
   2  17   1    1.30    0.37
  -2  17  -1    0.94    0.51
   3 -17   1    0.61    0.35
  -3 -17  -1    0.53    0.46
  -3 -17  -1   -0.47    0.46
   3 -17   1   -0.41    0.51
  -3  17  -1    1.02    0.58
  -3  17  -1    0.60    0.54
  -3  17  -1    0.84    0.56
   3  17   1    1.00    0.38
   3  17   1    0.45    0.55
  -4 -17  -1   -0.46    0.47
   4 -17   1    0.35    0.37
   4 -17   1    0.02    0.50
   4  17   1   -0.26    0.44
   4  17   1   -0.21    0.57
  -4  17  -1    0.68    0.57
  -4  17  -1    0.15    0.62
  -4  17  -1    1.23    0.61
  -5 -17  -1    4.95    0.74
   5 -17   1    5.46    0.59
   5 -17   1    2.95    0.57
  -5 -17  -1    3.69    0.61
   5  17   1    3.68    0.61
  -1 -18   1    0.54    0.45
   1 -18  -1    1.13    0.38
   1 -18  -1    0.30    0.53
  -1  18   1    1.48    0.66
   1  18  -1    0.87    0.60
   0 -18   1    0.59    0.76
   0 -18  -1    0.71    0.45
   0 -18   1   -0.41    0.46
   0 -18  -1    1.51    0.60
   0  18   1   -0.48    0.65
   0  18   1    0.25    0.44
   0  18  -1    1.70    0.60
   1 -18   1    0.03    0.65
  -1 -18  -1    1.13    0.47
   1 -18   1    1.65    0.41
  -1  18  -1    1.77    0.58
   1  18   1    1.38    0.68
  -1  18  -1    0.60    0.62
 -15   0   2    0.83    0.31
 -15   0   2   -0.57    0.49
 -14   0   2    3.53    0.39
 -14   0   2    3.49    0.61
 -14   0   2    2.18    0.32
 -13   0   2   -0.48    0.43
 -13   0   2   -0.13    0.23
 -13   0   2    0.05    0.23
 -13   0   2   -0.22    0.36
 -12   0   2    9.43    0.57
 -12   0   2    9.33    0.38
 -12   0   2    9.55    0.38
 -12   0   2    7.70    0.59
 -11   0   2   -0.07    0.19
 -11   0   2    0.01    0.28
 -11   0   2   -0.22    0.17
 -11   0   2   -0.32    0.28
 -10   0   2    3.44    0.42
 -10   0   2    2.64    0.44
  -9   0   2   -0.01    0.20
  -8   0   2   41.16    0.93
  -7   0   2    0.01    0.16
  -6   0   2   11.61    0.39
  -5   0   2    0.01    0.14
  -4   0   2   28.53    0.61
  -3   0   2    0.08    0.11
  -3   0   2    0.08    0.12
   2   0  -2  365.44    6.71
  -2   0   2  360.20    6.70
  -2   0   2  370.12    6.62
   1   0   2    0.03    0.08
   1   0   2   -0.07    0.07
  -1   0  -2    0.02    0.06
  -2   0  -2  292.06    5.18
   2   0   2  278.52    5.15
   2   0   2  295.87    5.23
  -2   0  -2  283.74    5.17
   2   0   2  285.43    5.16
  -2   0  -2  288.78    5.22
   3   0   2    0.06    0.13
  -3   0  -2    0.06    0.11
   3   0   2    0.10    0.11
  -3   0  -2    0.04    0.12
  -3   0  -2    0.10    0.11
   4   0   2   16.98    0.38
  -4   0  -2   17.56    0.39
   4   0   2   17.05    0.43
   4   0   2   17.71    0.38
  -4   0  -2   17.36    0.39
  -4   0  -2   17.41    0.43
  -5   0  -2    0.02    0.13
  -5   0  -2   -0.03    0.13
  -5   0  -2    0.03    0.15
   5   0   2   -0.11    0.15
   5   0   2   -0.04    0.12
   5   0   2   -0.32    0.12
   6   0   2    1.87    0.29
   6   0   2    2.25    0.21
  -6   0  -2    2.30    0.27
  -6   0  -2    2.38    0.22
   6   0   2    2.37    0.20
  -6   0  -2    2.43    0.22
  -7   0  -2   -0.18    0.17
  -7   0  -2   -0.04    0.14
   7   0   2   -0.09    0.20
  -7   0  -2   -0.02    0.14
  -8   0  -2   47.32    0.96
   8   0   2   46.81    1.07
  -8   0  -2   47.65    1.05
  -8   0  -2   46.74    0.96
  -9   0  -2   -0.07    0.18
  -9   0  -2   -0.19    0.20
  -9   0  -2   -0.20    0.17
   9   0   2   -0.32    0.24
 -10   0  -2   13.51    0.45
 -10   0  -2   13.93    0.46
  10   0   2   12.27    0.58
 -10   0  -2   13.50    0.56
 -11   0  -2   -0.13    0.22
 -11   0  -2    0.09    0.29
 -11   0  -2    0.01    0.24
  11   0   2   -0.07    0.31
 -12   0  -2   18.06    0.68
 -12   0  -2   18.08    0.57
 -12   0  -2   17.99    0.58
 -13   0  -2    0.01    0.29
 -13   0  -2   -0.37    0.28
 -13   0  -2   -0.04    0.37
  13   0   2   -0.05    0.51
 -14   0  -2    0.31    0.38
 -14   0  -2    0.67    0.31
 -14   0  -2    0.07    0.32
 -14   0  -2    0.26    0.35
 -15   0  -2    1.12    0.35
 -15   0  -2   -0.66    0.40
 -15   0  -2    0.05    0.57
 -15   0  -2    0.13    0.46
 -15  -1   2    0.37    0.44
 -15  -1   2    1.28    0.30
 -14  -1   2    3.06    0.40
 -14  -1   2    4.59    0.40
 -14  -1   2    3.79    0.56
 -14  -1   2    4.50    0.77
 -14   1   2    4.84    0.43
 -14   1   2    2.35    0.74
 -14   1   2    3.39    0.41
 -13  -1   2    1.30    0.35
 -13  -1   2    1.57    0.39
 -13  -1   2    1.41    0.26
 -13  -1   2    2.13    0.26
 -13   1   2    1.83    0.26
 -13   1   2    1.48    0.46
 -13   1   2    1.82    0.27
 -13   1   2    1.57    0.34
 -12  -1   2    1.23    0.21
 -12  -1   2    0.98    0.22
 -12  -1   2    1.00    0.29
 -12  -1   2    1.18    0.38
 -12   1   2    0.95    0.35
 -12   1   2    0.93    0.24
 -12   1   2    0.22    0.33
 -12   1   2    0.75    0.22
 -11  -1   2    3.75    0.42
 -11  -1   2    2.95    0.47
 -11   1   2    2.99    0.51
 -11   1   2    3.66    0.56
 -11   1   2    3.34    0.30
 -11   1   2    3.10    0.28
 -10  -1   2   -0.35    0.24
 -10  -1   2   -0.24    0.28
 -10   1   2   -0.41    0.28
 -10   1   2   -0.31    0.18
 -10   1   2   -0.08    0.24
 -10   1   2    0.11    0.16
  -9  -1   2    8.88    0.46
  -9  -1   2    8.79    0.42
  -9   1   2    8.92    0.45
   9   1  -2    8.74    0.45
  -8  -1   2    7.12    0.37
  -8   1   2    7.23    0.39
   8   1  -2    7.69    0.38
  -7  -1   2   37.66    0.83
  -7   1   2   37.42    0.86
   7   1  -2   38.30    0.84
  -6  -1   2    7.33    0.32
  -6   1   2    7.50    0.35
   6   1  -2    7.77    0.32
  -5  -1   2   15.67    0.43
  -5  -1   2   15.89    0.41
   5   1  -2   15.78    0.42
  -5   1   2   15.50    0.44
  -4  -1   2    4.79    0.22
  -4  -1   2    4.62    0.20
  -4   1   2    4.87    0.23
   4   1  -2    4.89    0.21
  -4   1   2    4.48    0.24
  -3  -1   2   59.62    1.13
  -3  -1   2   57.76    1.12
  -3   1   2   59.42    1.16
   3   1  -2   60.95    1.12
  -2  -1   2   -0.07    0.07
   2  -1  -2   -0.09    0.10
  -2  -1   2    0.13    0.08
  -2  -1   2   -0.03    0.07
  -2   1   2    0.05    0.09
  -2   1   2    0.08    0.05
   2   1  -2   -0.05    0.09
  -1  -1   2   21.66    0.46
  -1  -1   2   23.86    0.49
  -1  -1   2   24.38    0.47
   1  -1  -2   28.50    0.50
  -1  -1   2   26.43    0.48
   1   1  -2   28.82    0.50
  -1   1   2   23.15    0.48
  -1   1   2   23.98    0.47
   1  -1   2   10.87    0.24
   1  -1   2   10.82    0.25
   1  -1   2   11.03    0.25
   1  -1   2   10.88    0.24
  -1  -1  -2   10.81    0.24
  -1  -1  -2   10.82    0.24
  -1   1  -2   10.91    0.25
  -1   1  -2   10.65    0.24
   1   1   2   10.74    0.25
  -1   1  -2   10.41    0.25
   1   1   2   11.27    0.27
   1   1   2   10.55    0.25
  -1   1  -2   10.99    0.25
   2  -1   2  158.30    2.81
   2  -1   2  153.58    2.81
   2  -1   2  156.96    2.81
   2  -1   2  157.08    2.83
  -2  -1  -2  154.01    2.82
  -2  -1  -2  152.66    2.81
   2   1   2  157.28    2.81
   2   1   2  156.54    2.82
  -2   1  -2  152.57    2.81
  -2   1  -2  153.52    2.83
   2   1   2  155.96    2.81
  -2   1  -2  155.52    2.81
  -2   1  -2  157.24    2.81
  -3  -1  -2    0.18    0.12
   3  -1   2    0.14    0.14
  -3  -1  -2    0.43    0.11
   3  -1   2    0.32    0.12
   3  -1   2    0.19    0.12
   3   1   2    0.49    0.11
  -3   1  -2    0.40    0.12
  -3   1  -2    0.38    0.13
  -3   1  -2    0.25    0.11
   3   1   2    0.33    0.12
   3   1   2    0.21    0.13
  -3   1  -2    0.26    0.13
   4  -1   2    6.76    0.22
   4  -1   2    6.53    0.27
  -4  -1  -2    6.61    0.22
   4  -1   2    6.78    0.22
  -4  -1  -2    6.78    0.25
   4   1   2    6.60    0.21
  -4   1  -2    6.68    0.26
   4   1   2    6.72    0.21
  -4   1  -2    6.57    0.22
   4   1   2    6.31    0.26
  -4   1  -2    6.64    0.23
  -4   1  -2    6.93    0.23
   5  -1   2   15.28    0.45
  -5  -1  -2   15.94    0.39
  -5  -1  -2   15.39    0.43
  -5  -1  -2   14.94    0.38
   5  -1   2   15.88    0.38
  -5   1  -2   15.68    0.39
   5   1   2   15.03    0.37
   5   1   2   14.98    0.44
  -5   1  -2   16.01    0.39
  -5   1  -2   15.31    0.44
   5   1   2   15.60    0.37
   6  -1   2    1.99    0.23
  -6  -1  -2    1.99    0.25
  -6  -1  -2    2.38    0.21
  -6  -1  -2    2.17    0.22
   6  -1   2    2.33    0.21
   6   1   2    2.37    0.19
  -6   1  -2    2.45    0.22
  -6   1  -2    1.83    0.28
   6   1   2    2.06    0.29
  -6   1  -2    2.47    0.23
   6   1   2    2.01    0.20
  -7  -1  -2   39.02    0.86
   7  -1   2   38.07    0.89
  -7  -1  -2   38.63    0.80
   7  -1   2   37.25    0.76
  -7  -1  -2   38.19    0.79
  -7   1  -2   38.03    0.80
  -7   1  -2   38.54    0.80
  -7   1  -2   37.99    0.88
   7   1   2   38.30    0.88
   8  -1   2    2.15    0.27
  -8  -1  -2    1.77    0.23
  -8  -1  -2    1.76    0.25
  -8  -1  -2    1.85    0.24
  -8   1  -2    1.64    0.25
   8   1   2    2.27    0.29
  -8   1  -2    2.00    0.21
  -8   1  -2    1.94    0.25
  -9  -1  -2    0.68    0.19
   9  -1   2    0.68    0.28
  -9  -1  -2    0.87    0.20
  -9  -1  -2    0.70    0.22
  -9   1  -2    0.75    0.20
  -9   1  -2    0.67    0.20
  -9   1  -2    0.96    0.26
 -10  -1  -2    2.07    0.25
  10  -1   2    2.25    0.34
 -10  -1  -2    2.36    0.39
 -10  -1  -2    2.13    0.24
 -10   1  -2    2.16    0.26
  10   1   2    1.71    0.32
 -10   1  -2    2.26    0.25
 -10   1  -2    2.22    0.34
 -11  -1  -2    3.86    0.37
 -11  -1  -2    4.54    0.48
 -11  -1  -2    3.88    0.36
  11  -1   2    3.97    0.50
 -11   1  -2    3.87    0.36
 -11   1  -2    4.10    0.45
 -11   1  -2    3.87    0.35
  11   1   2    3.73    0.48
 -12  -1  -2    2.91    0.30
 -12  -1  -2    2.31    0.29
 -12  -1  -2    2.70    0.35
 -12   1  -2    2.76    0.31
 -12   1  -2    2.89    0.41
 -12   1  -2    2.69    0.29
 -12   1  -2    2.72    0.38
  13  -1   2   -0.09    0.41
 -13  -1  -2   -0.15    0.29
 -13  -1  -2   -0.13    0.32
 -13  -1  -2    0.03    0.27
 -13   1  -2    0.18    0.36
 -13   1  -2   -0.04    0.29
  13   1   2   -0.18    0.41
 -13   1  -2    0.11    0.28
 -13   1  -2    0.19    0.28
 -14  -1  -2    1.97    0.32
 -14  -1  -2    1.28    0.33
 -14  -1  -2    1.28    0.40
 -14   1  -2    1.29    0.34
 -14   1  -2    1.50    0.31
 -14   1  -2    1.55    0.35
 -14   1  -2    1.74    0.41
 -15  -1  -2    0.87    0.45
 -15  -1  -2    0.54    0.40
 -15   1  -2    0.75    0.46
 -15   1  -2    0.61    0.38
 -15   1  -2    1.73    0.38
 -15   1  -2    1.13    0.47
 -15  -2   2    0.05    0.40
 -15  -2   2    0.75    0.30
 -15   2   2    0.86    0.36
 -15   2   2    0.50    0.41
 -14  -2   2    0.51    0.28
 -14  -2   2    1.28    0.39
 -14  -2   2    0.81    0.26
 -14  -2   2    1.56    0.44
 -14   2   2    1.25    0.31
 -14   2   2    0.66    0.29
 -14   2   2    1.26    0.35
 -14   2   2    0.67    0.31
 -13  -2   2    1.99    0.37
 -13  -2   2    2.48    0.48
 -13  -2   2    2.25    0.35
 -13  -2   2    2.27    0.27
 -13   2   2    2.21    0.31
 -13   2   2    2.27    0.40
 -13   2   2    2.27    0.31
 -13   2   2    1.80    0.51
 -12  -2   2    4.26    0.68
 -12  -2   2    6.60    0.60
 -12  -2   2    5.67    0.35
 -12  -2   2    5.75    0.33
 -12   2   2    4.74    0.57
 -12   2   2    4.76    0.53
 -12   2   2    4.98    0.35
 -12   2   2    5.78    0.37
 -11  -2   2    0.59    0.19
 -11  -2   2    0.34    0.32
 -11  -2   2    0.61    0.29
 -11   2   2    0.33    0.29
 -11   2   2    0.79    0.22
 -11   2   2    0.50    0.20
 -11   2   2    0.77    0.37
 -10  -2   2    7.54    0.41
 -10  -2   2    7.05    0.48
 -10   2   2    7.49    0.34
  10   2  -2    7.62    0.47
 -10   2   2    7.96    0.31
 -10   2   2    7.21    0.49
  -9  -2   2    0.38    0.21
  -9   2   2    0.40    0.17
  -9   2   2    0.61    0.25
  -9   2   2    0.52    0.15
  -8  -2   2   21.16    0.57
  -8  -2   2   22.00    0.61
  -8   2   2   20.48    0.62
  -8   2   2   21.58    0.48
  -8   2   2   21.42    0.49
   8   2  -2   21.74    0.59
  -7  -2   2    1.12    0.18
  -7  -2   2    0.79    0.21
  -7   2   2    1.16    0.15
  -7   2   2    1.17    0.13
   7   2  -2    0.80    0.19
  -7   2   2    1.03    0.23
  -6  -2   2    1.55    0.25
  -6  -2   2    1.91    0.23
  -6   2   2    1.64    0.18
  -6   2   2    1.89    0.29
  -6   2   2    1.72    0.16
   6   2  -2    1.53    0.25
  -5  -2   2   13.86    0.39
  -5  -2   2   13.73    0.37
  -5   2   2   13.57    0.42
   5   2  -2   13.75    0.38
  -5   2   2   13.52    0.33
  -4  -2   2    0.38    0.10
  -4  -2   2    0.31    0.12
  -4   2   2    0.15    0.14
  -4   2   2    0.41    0.09
   4   2  -2    0.44    0.11
  -4   2   2    0.37    0.13
  -4   2   2    0.44    0.08
  -3  -2   2  243.46    4.34
  -3  -2   2  247.40    4.34
  -3  -2   2  238.28    4.32
  -3   2   2  240.22    4.37
  -3   2   2  241.55    4.31
   3   2  -2  238.90    4.32
  -3   2   2  230.76    4.32
   2  -2  -2  939.54   17.47
  -2  -2   2  985.67   17.45
  -2  -2   2  961.74   17.51
  -2  -2   2  981.68   17.61
   2  -2  -2  974.07   17.47
  -2  -2   2  990.99   17.46
   2   2  -2  954.16   17.52
  -2   2   2 1000.00   17.70
  -2   2   2  963.07   17.49
  -2   2   2  995.09   17.51
   1  -2  -2    3.18    0.14
   1  -2  -2    3.12    0.16
  -1  -2   2    3.04    0.13
  -1  -2   2    2.98    0.14
   1  -2  -2    3.07    0.12
  -1  -2   2    3.02    0.11
   1   2  -2    3.08    0.13
   1   2  -2    3.07    0.14
  -1   2   2    2.90    0.14
   1   2  -2    3.06    0.11
  -1   2   2    3.16    0.13
  -1   2   2    3.16    0.15
   1   2  -2    2.92    0.12
   0  -2  -2   32.90    0.63
   0  -2   2   33.56    0.63
   0  -2  -2   32.83    0.62
   0  -2  -2   33.22    0.62
   0   2  -2   33.25    0.62
   0   2   2   33.28    0.63
   0   2   2   33.04    0.62
   0   2  -2   34.34    0.63
   0   2  -2   28.14    0.62
   0   2  -2   33.34    0.63
   0   2   2   33.55    0.62
   1  -2   2    9.80    0.24
  -1  -2  -2   10.21    0.23
  -1  -2  -2    9.60    0.25
   1  -2   2    9.84    0.25
   1  -2   2   10.19    0.23
  -1  -2  -2    9.75    0.24
   1  -2   2   10.01    0.25
   1   2   2    9.77    0.25
   1   2   2   10.60    0.24
  -1   2  -2    9.89    0.25
  -1   2  -2    9.90    0.23
  -1   2  -2    9.93    0.24
   1   2   2   10.21    0.24
  -1   2  -2    9.84    0.25
  -2  -2  -2   40.60    0.78
  -2  -2  -2   39.58    0.78
  -2  -2  -2   39.66    0.77
   2  -2   2   41.03    0.78
   2  -2   2   40.44    0.77
   2  -2   2   39.82    0.77
   2  -2   2   40.71    0.80
  -2   2  -2   40.28    0.77
  -2   2  -2   40.09    0.80
  -2   2  -2   39.51    0.77
   2   2   2   39.99    0.77
  -2   2  -2   40.89    0.79
   2   2   2   40.20    0.78
   2   2   2   39.92    0.78
   3  -2   2    5.28    0.20
   3  -2   2    5.08    0.19
   3  -2   2    5.18    0.21
  -3  -2  -2    5.22    0.21
  -3  -2  -2    5.05    0.19
   3  -2   2    5.40    0.24
  -3  -2  -2    4.95    0.20
  -3   2  -2    5.13    0.18
  -3   2  -2    5.37    0.22
  -3   2  -2    5.09    0.24
   3   2   2    5.01    0.19
  -3   2  -2    4.91    0.20
   3   2   2    5.16    0.20
   3   2   2    4.78    0.21
   4  -2   2   25.03    0.58
  -4  -2  -2   24.83    0.53
  -4  -2  -2   25.06    0.55
   4  -2   2   24.93    0.52
  -4  -2  -2   24.69    0.52
   4  -2   2   25.29    0.53
   4   2   2   24.71    0.52
  -4   2  -2   25.24    0.52
  -4   2  -2   25.27    0.53
   4   2   2   24.61    0.56
   4   2   2   25.15    0.52
  -4   2  -2   25.43    0.54
  -4   2  -2   24.59    0.58
  -5  -2  -2    0.22    0.13
  -5  -2  -2    0.38    0.14
  -5  -2  -2    0.24    0.14
   5  -2   2    0.32    0.18
   5  -2   2    0.46    0.14
   5  -2   2    0.44    0.14
   5   2   2    0.34    0.13
  -5   2  -2    0.35    0.13
  -5   2  -2    0.24    0.16
   5   2   2    0.38    0.16
  -5   2  -2    0.30    0.15
  -5   2  -2    0.26    0.13
   5   2   2   -0.06    0.13
   6  -2   2    3.29    0.23
  -6  -2  -2    3.18    0.26
   6  -2   2    3.28    0.32
   6  -2   2    3.52    0.23
  -6  -2  -2    2.97    0.22
  -6   2  -2    3.35    0.29
  -6   2  -2    2.74    0.22
  -6   2  -2    3.22    0.23
  -6   2  -2    3.03    0.24
   6   2   2    3.00    0.21
   6   2   2    3.38    0.21
   6   2   2    3.33    0.30
  -7  -2  -2    1.55    0.26
   7  -2   2    1.69    0.22
  -7  -2  -2    1.55    0.17
   7  -2   2    1.45    0.25
  -7   2  -2    1.57    0.19
  -7   2  -2    1.23    0.22
  -7   2  -2    1.46    0.23
   7   2   2    1.69    0.23
  -7   2  -2    1.51    0.19
  -8  -2  -2    1.76    0.19
  -8  -2  -2    1.66    0.20
  -8  -2  -2    1.79    0.23
  -8   2  -2    1.94    0.27
  -8   2  -2    1.88    0.26
  -8   2  -2    1.87    0.20
   8   2   2    1.96    0.34
  -8   2  -2    1.72    0.20
  -9  -2  -2    2.99    0.35
  -9  -2  -2    2.38    0.28
   9  -2   2    2.92    0.33
  -9  -2  -2    2.41    0.30
  -9   2  -2    2.51    0.30
  -9   2  -2    2.53    0.29
   9   2   2    2.97    0.41
  -9   2  -2    2.68    0.31
  -9   2  -2    2.53    0.39
 -10  -2  -2    3.46    0.32
 -10  -2  -2    2.87    0.34
 -10  -2  -2    3.06    0.39
  10  -2   2    3.09    0.45
 -10   2  -2    3.36    0.35
  10   2   2    3.05    0.42
 -10   2  -2    3.83    0.50
 -10   2  -2    2.71    0.44
 -11  -2  -2    0.62    0.23
  11  -2   2    0.93    0.36
 -11  -2  -2    0.31    0.25
 -11  -2  -2    0.26    0.45
  11   2   2    0.40    0.31
 -11   2  -2    0.44    0.24
 -11   2  -2    0.23    0.24
 -11   2  -2    0.86    0.33
 -12  -2  -2   16.94    0.57
 -12  -2  -2   16.32    0.66
 -12  -2  -2   16.71    0.55
 -12   2  -2   17.31    0.59
 -12   2  -2   17.73    0.74
 -12   2  -2   16.75    0.55
 -12   2  -2   16.72    0.59
 -13  -2  -2    0.66    0.31
 -13  -2  -2    0.31    0.29
 -13  -2  -2    0.68    0.28
 -13   2  -2    0.08    0.28
 -13   2  -2    0.54    0.33
  13   2   2    0.41    0.38
 -13   2  -2    1.05    0.30
 -14  -2  -2    0.69    0.37
 -14  -2  -2    1.46    0.31
 -14  -2  -2    0.87    0.34
 -14   2  -2    1.22    0.37
  14   2   2    1.22    0.78
 -14   2  -2    1.54    0.33
 -14   2  -2    1.29    0.32
 -15  -2  -2   -0.17    0.45
 -15  -2  -2    0.12    0.41
 -15   2  -2   -0.43    0.40
 -15   2  -2    0.39    0.40
 -15   2  -2    1.41    0.35
 -15   2  -2    0.39    0.50
 -15  -3   2    1.59    0.50
 -15  -3   2    0.56    0.39
 -15  -3   2    0.80    0.30
 -15   3   2    0.83    0.42
 -15   3   2    0.45    0.41
 -15   3   2    0.30    0.46
 -14  -3   2    1.12    0.37
 -14  -3   2    0.03    0.51
 -14  -3   2    1.10    0.26
 -14   3   2    0.79    0.43
 -14   3   2    0.93    0.30
 -13  -3   2    0.24    0.24
 -13  -3   2    0.16    0.25
 -13  -3   2    0.46    0.35
 -13  -3   2    0.73    0.33
 -13   3   2    0.62    0.28
 -13   3   2    0.40    0.51
 -13   3   2    0.40    0.35
 -13   3   2    0.68    0.27
 -12  -3   2    0.38    0.21
 -12  -3   2    0.04    0.21
 -12  -3   2    0.73    0.37
 -12  -3   2    0.33    0.33
 -12   3   2    0.34    0.23
 -12   3   2    0.19    0.29
 -12   3   2   -0.05    0.38
 -12   3   2    0.07    0.25
 -12   3   2   -0.26    0.31
 -11  -3   2    3.75    0.41
 -11  -3   2    3.77    0.50
 -11  -3   2    3.27    0.29
 -11   3   2    3.24    0.53
 -11   3   2    3.64    0.32
 -11   3   2    3.26    0.34
 -11   3   2    3.73    0.49
  11   3  -2    3.43    0.45
 -11   3   2    3.53    0.34
 -10  -3   2    2.15    0.21
 -10  -3   2    2.70    0.36
 -10  -3   2    2.04    0.39
 -10   3   2    2.51    0.27
 -10   3   2    2.49    0.39
 -10   3   2    2.09    0.29
 -10   3   2    2.60    0.34
 -10   3   2    2.29    0.31
  -9  -3   2   -0.23    0.24
  -9  -3   2    0.07    0.20
  -9   3   2   -0.35    0.23
   9   3  -2   -0.09    0.22
  -9   3   2   -0.02    0.17
  -9   3   2    0.07    0.16
  -8  -3   2    6.68    0.33
  -8  -3   2    5.47    0.38
  -8   3   2    7.11    0.42
  -8   3   2    6.72    0.27
   8   3  -2    5.84    0.39
  -8   3   2    6.67    0.29
  -7  -3   2    4.85    0.27
  -7  -3   2    4.76    0.31
  -7   3   2    4.70    0.36
   7   3  -2    4.47    0.30
  -7   3   2    4.67    0.22
  -7   3   2    4.34    0.25
  -6  -3   2    0.49    0.16
  -6  -3   2    0.56    0.14
  -6   3   2    0.65    0.19
  -6   3   2    0.51    0.12
   6   3  -2    0.53    0.17
  -6   3   2    0.54    0.14
  -5  -3   2   52.16    1.04
  -5  -3   2   52.44    1.02
  -5   3   2   53.67    1.10
   5   3  -2   51.52    1.03
  -5   3   2   52.65    0.98
  -5   3   2   52.88    1.00
  -5   3   2   53.03    1.01
  -4  -3   2    3.99    0.20
  -4  -3   2    3.93    0.16
  -4  -3   2    4.35    0.18
  -4  -3   2    4.29    0.18
  -4   3   2    4.16    0.28
  -4   3   2    4.71    0.17
  -4   3   2    4.78    0.21
   4   3  -2    4.01    0.20
  -3  -3   2  148.96    2.67
  -3  -3   2  143.46    2.67
  -3  -3   2  150.14    2.71
   3  -3  -2  150.02    2.67
  -3  -3   2  145.72    2.66
   3  -3  -2  145.24    2.67
  -3  -3   2  144.64    2.66
  -3   3   2  148.22    2.67
  -3   3   2  150.71    2.68
  -3   3   2  152.31    2.74
   3   3  -2  146.13    2.67
  -2  -3   2   71.77    1.32
   2  -3  -2   73.79    1.33
  -2  -3   2   71.24    1.34
  -2  -3   2   68.33    1.30
  -2  -3   2   71.51    1.31
   2  -3  -2   72.60    1.32
   2   3  -2   66.75    1.31
  -2   3   2   73.63    1.33
   2   3  -2   70.86    1.31
  -2   3   2   73.65    1.32
  -2   3   2   73.90    1.36
   2   3  -2   70.52    1.30
   1  -3  -2   99.12    1.80
  -1  -3   2   98.97    1.80
  -1  -3   2   96.24    1.80
   1  -3  -2   95.17    1.81
   1  -3  -2   97.05    1.79
  -1   3   2   99.29    1.80
   1   3  -2   96.69    1.79
  -1   3   2  100.61    1.79
   1   3  -2   97.69    1.81
   1   3  -2   99.06    1.79
  -1   3   2   99.72    1.81
   0  -3  -2   14.02    0.31
   0  -3  -2   13.72    0.33
   0  -3  -2   13.36    0.31
   0  -3   2   13.53    0.33
   0  -3   2   13.94    0.32
   0   3   2   13.42    0.30
   0   3   2   13.17    0.33
   0   3   2   13.75    0.31
   0   3  -2   13.66    0.33
   0   3  -2   13.33    0.30
   0   3  -2   13.67    0.31
  -1  -3  -2    4.96    0.18
   1  -3   2    5.07    0.20
   1  -3   2    5.20    0.18
  -1  -3  -2    5.12    0.21
   1  -3   2    4.81    0.21
  -1  -3  -2    4.77    0.15
  -1   3  -2    5.15    0.18
  -1   3  -2    5.09    0.22
  -1   3  -2    4.93    0.19
   1   3   2    5.01    0.18
  -1   3  -2    5.01    0.20
   1   3   2    4.96    0.21
   1   3   2    4.92    0.18
  -2  -3  -2    8.45    0.26
   2  -3   2    8.52    0.23
   2  -3   2    8.29    0.27
   2  -3   2    8.14    0.25
  -2  -3  -2    8.40    0.23
  -2  -3  -2    8.37    0.24
   2  -3   2    8.19    0.27
   2   3   2    8.32    0.24
   2   3   2    8.54    0.26
  -2   3  -2    8.72    0.23
   2   3   2    8.59    0.24
  -2   3  -2    8.03    0.27
  -2   3  -2    8.22    0.25
  -2   3  -2    8.56    0.28
  -3  -3  -2   15.63    0.36
   3  -3   2   15.88    0.40
   3  -3   2   15.73    0.37
   3  -3   2   15.62    0.35
   3  -3   2   15.82    0.38
  -3  -3  -2   15.74    0.36
  -3  -3  -2   15.89    0.37
   3   3   2   15.51    0.37
  -3   3  -2   15.89    0.35
   3   3   2   15.90    0.38
  -3   3  -2   15.81    0.38
  -3   3  -2   15.56    0.40
  -3   3  -2   15.50    0.36
   3   3   2   16.22    0.36
  -4  -3  -2    1.18    0.18
   4  -3   2    1.72    0.20
   4  -3   2    1.63    0.21
  -4  -3  -2    1.60    0.20
  -4  -3  -2    1.51    0.17
   4  -3   2    1.26    0.17
   4  -3   2    1.30    0.18
  -4   3  -2    1.56    0.18
  -4   3  -2    1.41    0.16
   4   3   2    1.31    0.20
  -4   3  -2    1.44    0.18
  -4   3  -2    1.53    0.21
   4   3   2    1.46    0.19
   4   3   2    1.34    0.17
  -5  -3  -2   11.50    0.33
   5  -3   2   12.16    0.35
  -5  -3  -2   11.84    0.36
  -5  -3  -2   11.93    0.36
   5  -3   2   12.17    0.36
   5  -3   2   11.94    0.42
   5   3   2   11.97    0.39
  -5   3  -2   12.39    0.35
   5   3   2   11.42    0.33
   5   3   2   11.61    0.33
  -5   3  -2   11.92    0.33
  -5   3  -2   12.18    0.37
  -5   3  -2   11.76    0.42
  -6  -3  -2   31.57    0.70
   6  -3   2   30.72    0.66
  -6  -3  -2   30.82    0.66
   6  -3   2   31.34    0.66
  -6  -3  -2   30.74    0.67
   6  -3   2   31.74    0.75
   6   3   2   30.56    0.64
  -6   3  -2   31.46    0.67
   6   3   2   31.00    0.64
   6   3   2   30.69    0.72
  -6   3  -2   30.83    0.66
  -6   3  -2   31.73    0.69
  -6   3  -2   31.20    0.75
   7  -3   2    5.37    0.33
  -7  -3  -2    5.28    0.28
  -7  -3  -2    5.47    0.30
  -7  -3  -2    4.92    0.26
   7  -3   2    4.69    0.42
   7  -3   2    5.49    0.27
   7   3   2    5.42    0.35
  -7   3  -2    5.64    0.26
  -7   3  -2    5.68    0.30
  -7   3  -2    5.25    0.27
  -7   3  -2    5.26    0.35
  -8  -3  -2    9.72    0.40
  -8  -3  -2    9.15    0.34
   8  -3   2    8.67    0.32
   8  -3   2    9.19    0.46
  -8   3  -2    9.58    0.38
  -8   3  -2    9.46    0.35
  -8   3  -2    9.44    0.45
  -8   3  -2    8.97    0.35
   8   3   2    8.73    0.75
  -9  -3  -2    1.15    0.20
   9  -3   2    1.53    0.31
  -9  -3  -2    1.41    0.22
  -9  -3  -2    1.20    0.24
  -9   3  -2    1.17    0.29
  -9   3  -2    1.56    0.22
  -9   3  -2    1.39    0.22
   9   3   2    1.51    0.32
  -9   3  -2    1.09    0.23
  10  -3   2    6.23    0.51
 -10  -3  -2    7.01    0.44
 -10  -3  -2    6.67    0.42
 -10  -3  -2    6.79    0.37
 -10   3  -2    5.64    0.75
  10   3   2    6.69    0.49
 -10   3  -2    7.19    0.37
 -10   3  -2    6.89    0.40
 -10   3  -2    7.09    0.38
 -11  -3  -2   12.66    0.47
 -11  -3  -2   10.64    0.56
 -11   3  -2   11.81    0.60
 -11   3  -2   12.89    0.48
  11   3   2   11.65    0.58
 -11   3  -2   11.92    0.46
 -11   3  -2   12.25    0.49
 -12  -3  -2    7.61    0.51
 -12  -3  -2    7.06    0.45
 -12  -3  -2    6.70    0.44
 -12   3  -2    7.22    0.61
 -12   3  -2    7.64    0.45
 -12   3  -2    7.56    0.48
 -12   3  -2    7.74    0.45
 -13  -3  -2    1.37    0.31
 -13  -3  -2    0.78    0.33
 -13  -3  -2    1.16    0.30
 -13   3  -2    0.94    0.36
  13   3   2    0.51    0.44
 -13   3  -2    0.66    0.43
 -13   3  -2    0.95    0.29
 -13   3  -2    0.52    0.29
 -14  -3  -2    0.59    0.33
 -14  -3  -2    0.35    0.38
 -14  -3  -2    0.51    0.34
 -14   3  -2    0.08    0.33
 -14   3  -2    0.16    0.34
 -14   3  -2    1.46    0.36
 -14   3  -2    1.02    0.42
 -15  -3  -2    1.53    0.44
 -15  -3  -2    1.81    0.45
 -15   3  -2    2.35    0.45
 -15   3  -2    0.76    0.64
 -15  -4   2   -0.39    0.35
 -15   4   2   -0.30    0.49
 -15   4   2   -0.54    0.39
 -14  -4   2    3.96    0.52
 -14  -4   2    3.88    0.46
 -14  -4   2    4.70    0.66
 -14   4   2    4.81    0.51
 -14   4   2    3.38    0.45
 -14   4   2    5.37    0.45
 -14   4   2    4.40    0.58
 -13  -4   2    2.24    0.27
 -13  -4   2    1.55    0.32
 -13  -4   2    2.31    0.35
 -13   4   2    1.49    0.28
 -13   4   2    2.27    0.79
 -13   4   2    2.09    0.32
 -13   4   2    1.44    0.43
 -12  -4   2   -0.09    0.27
 -12  -4   2    0.41    0.21
 -12  -4   2    0.18    0.34
 -12   4   2    0.60    0.31
  12   4  -2    0.07    0.32
 -12   4   2   -0.26    0.27
 -12   4   2    0.10    0.37
 -12   4   2   -0.22    0.24
 -12   4   2   -0.22    0.38
 -11  -4   2   12.21    0.57
 -11  -4   2   10.94    0.41
 -11  -4   2   11.11    0.50
 -11  -4   2   11.21    0.39
 -11   4   2   11.65    0.63
 -11   4   2   10.94    0.66
 -11   4   2   11.54    0.45
 -11   4   2   11.67    0.41
 -11   4   2   10.86    0.42
  11   4  -2   10.77    0.52
 -10  -4   2   20.38    0.53
 -10  -4   2   20.76    0.52
 -10  -4   2   22.86    0.78
 -10  -4   2   21.54    0.61
 -10   4   2   21.40    0.53
 -10   4   2   21.99    0.55
 -10   4   2   20.95    0.57
  10   4  -2   20.20    0.67
 -10   4   2   19.34    0.76
  -9  -4   2    9.83    0.41
  -9  -4   2   10.28    0.47
  -9  -4   2    9.90    0.36
  -9  -4   2    9.75    0.33
  -9   4   2    9.81    0.51
  -9   4   2    9.67    0.35
  -9   4   2   10.16    0.33
   9   4  -2    9.31    0.46
  -9   4   2   10.33    0.39
  -8  -4   2    2.10    0.32
  -8  -4   2    1.85    0.26
  -8  -4   2    1.84    0.20
  -8  -4   2    1.75    0.23
   8   4  -2    2.12    0.25
  -8   4   2    2.18    0.30
  -8   4   2    1.92    0.27
  -8   4   2    1.74    0.23
  -8   4   2    1.67    0.20
  -7  -4   2    3.38    0.23
  -7  -4   2    4.10    0.25
  -7  -4   2    3.60    0.20
  -7  -4   2    4.13    0.30
  -7   4   2    4.04    0.36
  -7   4   2    3.99    0.23
   7   4  -2    4.01    0.36
  -7   4   2    3.99    0.19
  -7   4   2    3.97    0.26
  -6  -4   2   18.94    0.42
  -6  -4   2   19.38    0.45
  -6  -4   2   18.86    0.44
  -6  -4   2   18.63    0.47
  -6   4   2   18.47    0.55
  -6   4   2   18.71    0.44
  -6   4   2   18.60    0.46
   6   4  -2   19.22    0.48
  -6   4   2   18.85    0.40
   5  -4  -2    2.44    0.18
  -5  -4   2    2.79    0.19
  -5  -4   2    1.95    0.18
   5  -4  -2    2.11    0.20
  -5  -4   2    2.08    0.21
  -5  -4   2    2.39    0.21
   5   4  -2    2.10    0.23
  -5   4   2    1.84    0.24
  -5   4   2    2.36    0.20
  -5   4   2    2.46    0.30
  -4  -4   2   26.16    0.53
  -4  -4   2   25.72    0.55
  -4  -4   2   26.02    0.60
   4  -4  -2   25.92    0.53
  -4  -4   2   26.72    0.53
  -4  -4   2   25.76    0.53
   4  -4  -2   25.48    0.54
  -4   4   2   25.61    0.64
  -4   4   2   26.40    0.57
   4   4  -2   25.63    0.54
  -4   4   2   26.11    0.55
  -3  -4   2    6.22    0.17
  -3  -4   2    6.35    0.23
  -3  -4   2    6.12    0.26
   3  -4  -2    6.87    0.22
  -3  -4   2    6.72    0.17
   3  -4  -2    6.44    0.23
  -3  -4   2    6.20    0.20
  -3   4   2    6.71    0.25
   3   4  -2    6.15    0.21
   3   4  -2    6.20    0.19
  -3   4   2    6.72    0.21
  -3   4   2    6.57    0.29
   3   4  -2    6.33    0.19
  -2  -4   2   10.04    0.28
  -2  -4   2    9.92    0.29
   2  -4  -2   10.41    0.26
  -2  -4   2   10.24    0.26
   2  -4  -2    9.85    0.28
   2   4  -2   10.28    0.25
  -2   4   2   10.47    0.30
  -2   4   2   10.52    0.26
   2   4  -2   10.00    0.27
   2   4  -2    9.37    0.23
  -2   4   2   10.24    0.29
   1  -4  -2   25.75    0.54
   1  -4  -2   25.29    0.52
  -1  -4   2   25.63    0.54
   1  -4  -2   24.67    0.54
   1  -4  -2   25.76    0.50
  -1  -4   2   25.47    0.54
   1   4  -2   25.16    0.53
   1   4  -2   26.01    0.52
  -1   4   2   26.06    0.54
  -1   4   2   25.83    0.54
  -1   4   2   26.16    0.53
   0  -4  -2    0.23    0.10
   0  -4  -2    0.12    0.11
   0  -4   2    0.21    0.12
   0  -4   2    0.32    0.10
   0  -4  -2    0.14    0.09
   0  -4   2    0.12    0.10
   0   4  -2    0.32    0.10
   0   4   2    0.14    0.12
   0   4  -2    0.11    0.09
   0   4   2    0.17    0.09
   0   4  -2    0.23    0.12
   0   4   2    0.32    0.09
  -1  -4  -2    1.03    0.10
   1  -4   2    1.23    0.13
  -1  -4  -2    1.04    0.13
   1  -4   2    1.26    0.14
  -1  -4  -2    1.12    0.13
   1  -4   2    1.30    0.15
  -1   4  -2    1.06    0.15
   1   4   2    1.13    0.16
  -1   4  -2    1.12    0.13
   1   4   2    1.25    0.13
  -1   4  -2    1.22    0.14
   1   4   2    1.00    0.14
  -1   4  -2    1.10    0.14
  -2  -4  -2    0.04    0.11
   2  -4   2    0.01    0.12
   2  -4   2    0.22    0.11
  -2  -4  -2    0.06    0.08
   2  -4   2    0.17    0.09
  -2  -4  -2    0.13    0.09
   2   4   2    0.12    0.09
   2   4   2    0.11    0.11
  -2   4  -2    0.04    0.11
  -2   4  -2    0.08    0.09
  -2   4  -2    0.23    0.09
   2   4   2    0.04    0.09
  -2   4  -2    0.09    0.11
   3  -4   2   30.42    0.64
   3  -4   2   30.22    0.60
   3  -4   2   29.59    0.62
  -3  -4  -2   29.45    0.63
  -3  -4  -2   30.02    0.62
  -3  -4  -2   29.28    0.61
  -3   4  -2   30.61    0.60
  -3   4  -2   29.98    0.64
   3   4   2   30.21    0.61
  -3   4  -2   30.12    0.66
   3   4   2   29.40    0.62
   3   4   2   29.64    0.62
  -3   4  -2   29.79    0.62
   4  -4   2    3.93    0.26
  -4  -4  -2    3.27    0.21
  -4  -4  -2    3.26    0.22
   4  -4   2    3.58    0.24
  -4  -4  -2    3.08    0.25
   4  -4   2    3.45    0.21
   4   4   2    3.35    0.21
  -4   4  -2    3.89    0.27
  -4   4  -2    3.90    0.29
  -4   4  -2    3.45    0.20
   4   4   2    3.52    0.25
  -4   4  -2    3.77    0.23
   4   4   2    3.60    0.24
  -5  -4  -2   13.69    0.38
   5  -4   2   13.81    0.38
  -5  -4  -2   13.86    0.39
   5  -4   2   13.65    0.39
  -5  -4  -2   13.43    0.37
  -5   4  -2   13.83    0.38
  -5   4  -2   13.98    0.35
   5   4   2   13.77    0.41
   5   4   2   13.28    0.38
  -5   4  -2   13.81    0.41
  -5   4  -2   13.45    0.45
   5   4   2   13.70    0.36
  -6  -4  -2   -0.03    0.16
   6  -4   2    0.29    0.21
  -6  -4  -2    0.16    0.14
  -6  -4  -2    0.08    0.14
   6  -4   2    0.14    0.16
   6  -4   2    0.12    0.17
   6   4   2    0.12    0.17
  -6   4  -2   -0.01    0.19
   6   4   2   -0.20    0.13
   6   4   2    0.11    0.15
  -6   4  -2    0.42    0.18
  -6   4  -2    0.23    0.15
  -6   4  -2    0.13    0.13
  -7  -4  -2   13.97    0.43
   7  -4   2   13.90    0.42
  -7  -4  -2   13.73    0.39
   7  -4   2   13.89    0.40
  -7  -4  -2   14.40    0.42
   7   4   2   14.02    0.47
  -7   4  -2   13.73    0.38
  -7   4  -2   13.80    0.41
   7   4   2   13.61    0.37
  -7   4  -2   13.50    0.50
  -7   4  -2   14.25    0.44
  -8  -4  -2    0.28    0.20
   8  -4   2    0.75    0.19
  -8  -4  -2    0.38    0.17
   8  -4   2    0.59    0.19
  -8  -4  -2    0.85    0.20
  -8   4  -2    0.66    0.22
  -8   4  -2    0.82    0.20
   8   4   2    0.70    0.43
  -8   4  -2    0.66    0.25
  -8   4  -2    0.67    0.18
  -9  -4  -2    2.12    0.26
  -9  -4  -2    1.75    0.23
   9   4   2    2.19    0.31
  -9   4  -2    2.38    0.30
  -9   4  -2    1.74    0.30
  -9   4  -2    2.12    0.26
  -9   4  -2    2.03    0.23
 -10  -4  -2    2.04    0.26
 -10  -4  -2    2.19    0.24
 -10   4  -2    2.22    0.26
  10   4   2    2.12    0.31
 -10   4  -2    2.10    0.27
 -10   4  -2    2.01    0.33
 -10   4  -2    1.52    0.31
 -11  -4  -2   -0.12    0.26
 -11  -4  -2   -0.43    0.23
 -11   4  -2   -0.32    0.25
 -11   4  -2   -0.08    0.22
 -11   4  -2   -0.28    0.31
 -11   4  -2   -0.39    0.26
  11   4   2    0.04    0.32
 -12  -4  -2   10.30    0.51
 -12  -4  -2   11.08    0.49
 -12  -4  -2   10.18    0.54
 -12   4  -2   11.37    0.65
 -12   4  -2   10.40    0.55
 -12   4  -2   10.70    0.47
 -12   4  -2   11.03    0.51
 -13  -4  -2    1.07    0.30
 -13  -4  -2    0.19    0.30
  13   4   2   -0.18    0.38
 -13   4  -2    0.65    0.27
 -13   4  -2    0.65    0.31
 -13   4  -2   -0.10    0.42
 -13   4  -2    1.07    0.34
 -14  -4  -2    0.83    0.34
 -14  -4  -2    0.23    0.38
 -14  -4  -2    0.44    0.40
 -14   4  -2    1.00    0.53
 -14   4  -2    0.82    0.34
 -14   4  -2    0.31    0.38
  14   4   2    0.76    0.57
 -14   4  -2    1.42    0.38
 -15  -4  -2    3.25    0.47
 -15  -4  -2    4.57    0.64
 -15   4  -2    2.57    0.61
 -15   4  -2    3.26    0.43
 -15   4  -2    2.29    0.45
 -14  -5   2    3.81    0.52
 -14  -5   2    3.36    0.49
 -14  -5   2    6.22    0.59
 -14  -5   2    4.29    0.43
 -14  -5   2    4.95    0.60
 -14   5   2    4.69    0.45
 -14   5   2    5.50    0.52
 -14   5   2    4.50    0.72
 -14   5   2    3.58    0.51
 -13  -5   2    0.31    0.26
 -13  -5   2   -0.24    0.37
 -13  -5   2    0.10    0.28
 -13   5   2   -0.12    0.40
 -13   5   2   -0.17    0.27
 -13   5   2    0.38    0.33
  13   5  -2    0.09    0.35
 -12  -5   2    1.01    0.27
 -12  -5   2    1.06    0.32
 -12  -5   2    0.99    0.32
 -12  -5   2    0.70    0.24
  12   5  -2    1.15    0.34
 -12   5   2    1.11    0.30
 -12   5   2    1.33    0.36
 -12   5   2    0.26    0.38
 -12   5   2    0.40    0.25
 -12   5   2    1.01    0.23
 -11  -5   2    0.12    0.25
 -11  -5   2   -0.14    0.21
 -11  -5   2    0.24    0.23
 -11   5   2    0.07    0.19
 -11   5   2   -0.13    0.25
 -11   5   2   -0.12    0.33
 -11   5   2   -0.31    0.23
  11   5  -2   -0.25    0.26
 -10  -5   2   -0.13    0.22
 -10  -5   2   -0.01    0.22
 -10  -5   2    0.16    0.23
 -10  -5   2    0.01    0.18
  10   5  -2   -0.28    0.27
 -10   5   2    0.10    0.16
 -10   5   2    0.21    0.31
 -10   5   2   -0.13    0.22
 -10   5   2    0.15    0.22
  -9  -5   2    1.99    0.29
  -9  -5   2    1.82    0.26
  -9  -5   2    1.88    0.25
  -9  -5   2    1.85    0.28
  -9   5   2    2.05    0.23
  -9   5   2    2.32    0.25
  -9   5   2    1.45    0.32
  -9   5   2    1.58    0.22
  -9   5   2    1.82    0.35
   9   5  -2    1.48    0.26
  -8  -5   2    1.69    0.18
  -8  -5   2    1.44    0.21
  -8  -5   2    1.36    0.20
  -8  -5   2    1.52    0.25
  -8   5   2    1.64    0.19
  -8   5   2    1.78    0.26
   8   5  -2    1.64    0.22
  -8   5   2    1.95    0.22
  -8   5   2    1.89    0.31
  -7  -5   2    4.83    0.28
  -7  -5   2    5.07    0.25
  -7  -5   2    4.58    0.27
  -7  -5   2    4.80    0.23
  -7   5   2    5.22    0.30
   7   5  -2    4.65    0.30
  -7   5   2    5.03    0.39
  -7   5   2    4.56    0.26
   6  -5  -2   28.42    0.59
  -6  -5   2   28.61    0.59
  -6  -5   2   28.12    0.61
  -6  -5   2   28.02    0.60
  -6  -5   2   27.24    0.60
   6  -5  -2   28.04    0.60
  -6   5   2   27.69    0.72
  -6   5   2   28.43    0.64
  -6   5   2   28.32    0.61
  -5  -5   2    0.67    0.20
  -5  -5   2    0.74    0.11
  -5  -5   2    0.54    0.13
  -5  -5   2    0.66    0.12
   5  -5  -2    0.85    0.15
   5  -5  -2    1.08    0.15
  -5  -5   2    0.48    0.15
   5   5  -2    0.76    0.15
  -5   5   2    0.79    0.17
  -5   5   2    0.64    0.22
  -5   5   2    0.97    0.15
  -4  -5   2    1.76    0.15
   4  -5  -2    1.84    0.18
  -4  -5   2    1.67    0.21
  -4  -5   2    1.87    0.14
   4  -5  -2    1.87    0.21
  -4  -5   2    1.56    0.23
  -4  -5   2    1.53    0.19
   4   5  -2    1.85    0.19
   4   5  -2    1.75    0.17
   4   5  -2    1.53    0.19
  -4   5   2    1.77    0.23
  -4   5   2    2.02    0.21
  -4   5   2    1.96    0.20
   3  -5  -2   54.20    1.03
  -3  -5   2   51.44    1.06
  -3  -5   2   52.68    1.02
   3  -5  -2   52.77    1.04
  -3  -5   2   52.56    1.04
   3   5  -2   53.51    1.00
  -3   5   2   54.89    1.04
   3   5  -2   53.32    1.01
  -3   5   2   54.27    1.06
  -3   5   2   53.64    1.09
   3   5  -2   52.60    1.02
   2  -5  -2   12.04    0.31
  -2  -5   2   11.75    0.31
  -2  -5   2   11.95    0.34
   2  -5  -2   12.51    0.27
   2  -5  -2   11.80    0.34
  -2  -5   2   11.97    0.34
   2   5  -2   12.40    0.27
   2   5  -2   11.96    0.30
   2   5  -2   11.93    0.33
  -2   5   2   12.54    0.32
  -2   5   2   12.08    0.35
  -2   5   2   12.27    0.36
   1  -5  -2    0.53    0.14
  -1  -5   2    0.51    0.13
   1  -5  -2    0.47    0.11
  -1  -5   2    0.41    0.11
  -1  -5   2    0.68    0.14
   1  -5  -2    0.60    0.09
  -1   5   2    0.46    0.12
   1   5  -2    0.51    0.13
   1   5  -2    0.57    0.11
   1   5  -2    0.52    0.13
  -1   5   2    0.50    0.14
  -1   5   2    0.46    0.12
   0  -5   2    5.93    0.21
   0  -5  -2    5.33    0.20
   0  -5  -2    5.42    0.24
   0  -5  -2    5.68    0.21
   0  -5   2    5.55    0.24
   0   5  -2    5.77    0.21
   0   5  -2    5.59    0.24
   0   5   2    5.52    0.21
   0   5  -2    5.90    0.22
   0   5   2    5.47    0.19
   0   5   2    5.69    0.24
  -1  -5  -2    2.38    0.21
   1  -5   2    2.66    0.17
  -1  -5  -2    2.23    0.17
   1  -5   2    2.49    0.18
  -1  -5  -2    2.09    0.14
   1  -5   2    2.51    0.21
   1   5   2    2.37    0.12
  -1   5  -2    2.35    0.21
   1   5   2    2.48    0.17
  -1   5  -2    2.85    0.17
  -1   5  -2    2.36    0.17
   1   5   2    2.58    0.21
  -2  -5  -2   41.52    0.84
  -2  -5  -2   40.13    0.78
  -2  -5  -2   41.42    0.82
   2  -5   2   41.23    0.85
   2  -5   2   41.79    0.83
   2  -5   2   42.29    0.81
  -2   5  -2   41.28    0.85
  -2   5  -2   41.36    0.83
   2   5   2   43.27    0.83
   2   5   2   42.11    0.82
   2   5   2   40.79    0.84
  -2   5  -2   42.49    0.82
  -2   5  -2   40.99    0.85
  -3  -5  -2    0.48    0.17
   3  -5   2    0.44    0.16
  -3  -5  -2    0.30    0.13
   3  -5   2    0.28    0.13
   3  -5   2    0.15    0.17
  -3  -5  -2    0.30    0.12
  -3   5  -2    0.24    0.17
  -3   5  -2    0.32    0.17
  -3   5  -2    0.25    0.12
   3   5   2    0.32    0.13
  -3   5  -2    0.29    0.14
   3   5   2    0.06    0.13
   3   5   2    0.34    0.16
  -4  -5  -2    6.25    0.27
  -4  -5  -2    6.70    0.26
   4  -5   2    6.66    0.32
   4  -5   2    6.84    0.30
   4  -5   2    6.22    0.25
  -4  -5  -2    6.15    0.30
  -4   5  -2    6.46    0.25
  -4   5  -2    6.66    0.28
   4   5   2    6.36    0.26
  -4   5  -2    6.40    0.32
  -4   5  -2    6.68    0.36
   4   5   2    6.45    0.28
   4   5   2    6.29    0.30
   5  -5   2    0.06    0.16
   5  -5   2   -0.02    0.14
  -5  -5  -2   -0.22    0.16
   5  -5   2   -0.06    0.17
  -5  -5  -2    0.10    0.12
  -5  -5  -2    0.09    0.15
   5   5   2    0.05    0.16
   5   5   2    0.14    0.14
  -5   5  -2    0.01    0.15
   5   5   2   -0.13    0.16
  -5   5  -2    0.10    0.20
  -5   5  -2    0.20    0.18
  -5   5  -2   -0.06    0.12
  -6  -5  -2    3.92    0.26
  -6  -5  -2    4.82    0.30
   6  -5   2    4.37    0.30
  -6  -5  -2    4.47    0.25
   6  -5   2    4.40    0.28
  -6   5  -2    4.65    0.28
  -6   5  -2    4.39    0.30
   6   5   2    4.00    0.26
  -6   5  -2    4.26    0.22
  -6   5  -2    4.42    0.35
   6   5   2    4.31    0.30
   6   5   2    4.24    0.35
   7  -5   2    3.51    0.29
  -7  -5  -2    3.59    0.31
   7  -5   2    3.70    0.30
  -7  -5  -2    3.23    0.26
  -7  -5  -2    3.18    0.26
  -7   5  -2    3.21    0.24
   7   5   2    3.25    0.26
   7   5   2    3.31    0.24
  -7   5  -2    3.50    0.29
   7   5   2    2.97    0.33
  -7   5  -2    3.56    0.32
  -7   5  -2    3.36    0.37
  -8  -5  -2   14.61    0.47
   8  -5   2   14.33    0.45
  -8  -5  -2   14.99    0.48
  -8  -5  -2   14.34    0.44
   8  -5   2   14.49    0.45
  -8   5  -2   15.51    0.58
  -8   5  -2   15.31    0.51
  -8   5  -2   14.73    0.42
   8   5   2   15.11    0.61
  -8   5  -2   14.00    0.58
   9  -5   2    6.27    0.34
  -9  -5  -2    6.30    0.37
   9  -5   2    6.43    0.34
  -9  -5  -2    6.09    0.36
  -9   5  -2    5.62    0.51
   9   5   2    6.47    0.46
  -9   5  -2    6.13    0.33
  -9   5  -2    6.68    0.43
 -10  -5  -2    2.16    0.33
 -10  -5  -2    2.33    0.36
 -10   5  -2    2.46    0.27
 -10   5  -2    2.50    0.30
  10   5   2    2.14    0.32
 -10   5  -2    2.07    0.35
 -11  -5  -2    0.30    0.43
 -11  -5  -2    0.29    0.23
  11   5   2    0.44    0.36
 -11   5  -2    0.29    0.26
 -11   5  -2    0.33    0.28
 -11   5  -2    0.22    0.30
 -11   5  -2    0.23    0.25
 -12  -5  -2    3.30    0.33
 -12  -5  -2    3.03    0.46
 -12  -5  -2    3.30    0.41
 -12   5  -2    3.41    0.44
  12   5   2    3.35    0.47
 -12   5  -2    3.53    0.45
 -12   5  -2    4.50    0.38
 -12   5  -2    3.68    0.42
 -13  -5  -2    0.41    0.32
 -13  -5  -2    1.01    0.28
 -13  -5  -2   -0.28    0.32
 -13   5  -2    0.28    0.30
 -13   5  -2    0.58    0.27
  13   5   2    0.58    0.44
 -13   5  -2   -0.11    0.29
 -13   5  -2    1.22    0.40
 -14  -5  -2    8.45    0.59
 -14  -5  -2    9.43    0.56
 -14  -5  -2    8.62    0.62
 -14   5  -2    8.95    0.54
 -14   5  -2    7.58    0.82
  14   5   2    5.87    0.82
 -14   5  -2    8.02    0.62
 -14   5  -2    7.59    0.62
 -14  -6   2    0.71    0.43
 -14  -6   2    1.35    0.32
 -14  -6   2    0.91    0.31
 -14  -6   2    0.51    0.38
 -14   6   2    1.47    0.39
 -14   6   2   -0.15    0.37
 -14   6   2   -0.02    0.46
 -13  -6   2    0.25    0.40
 -13  -6   2   -0.31    0.35
 -13  -6   2    0.48    0.29
 -13  -6   2    0.34    0.27
  13   6  -2   -0.11    0.38
 -13   6   2   -0.31    0.33
 -13   6   2   -0.28    0.42
 -13   6   2    0.01    0.28
 -13   6   2    0.05    0.23
 -12  -6   2    0.53    0.31
 -12  -6   2    0.76    0.25
 -12  -6   2    1.04    0.33
 -12  -6   2    0.99    0.28
  12   6  -2    0.81    0.34
 -12   6   2    0.20    0.47
 -12   6   2    0.61    0.42
 -12   6   2    1.33    0.22
 -12   6   2    0.96    0.27
 -12   6   2    0.72    0.32
 -11  -6   2    0.52    0.24
 -11  -6   2    0.64    0.23
 -11  -6   2    0.81    0.34
 -11  -6   2    0.89    0.25
  11   6  -2    0.44    0.31
 -11   6   2    0.78    0.18
 -11   6   2    0.61    0.34
 -11   6   2    0.40    0.24
 -11   6   2    0.81    0.28
 -10  -6   2    8.04    0.51
 -10  -6   2    7.94    0.50
 -10  -6   2    7.78    0.36
 -10  -6   2    7.71    0.39
 -10   6   2    7.97    0.44
  10   6  -2    8.03    0.46
 -10   6   2    7.80    0.58
 -10   6   2    8.09    0.29
  -9  -6   2    2.29    0.29
  -9  -6   2    1.75    0.21
  -9  -6   2    2.04    0.31
  -9  -6   2    1.61    0.22
   9   6  -2    1.94    0.28
  -9   6   2    2.01    0.26
  -9   6   2    1.73    0.21
  -8  -6   2    2.89    0.26
  -8  -6   2    2.80    0.30
  -8  -6   2    2.34    0.30
  -8  -6   2    3.36    0.27
  -8   6   2    3.20    0.46
  -8   6   2    3.19    0.35
  -8   6   2    3.02    0.35
   8   6  -2    2.83    0.34
  -8   6   2    3.64    0.29
  -7  -6   2    3.76    0.25
   7  -6  -2    4.06    0.25
  -7  -6   2    3.70    0.26
   7  -6  -2    3.92    0.26
  -7  -6   2    3.87    0.29
  -7  -6   2    3.62    0.24
   7   6  -2    4.06    0.31
  -7   6   2    3.92    0.28
  -7   6   2    3.82    0.39
  -7   6   2    4.06    0.32
  -7   6   2    2.68    0.43
   6  -6  -2    0.23    0.16
   6  -6  -2   -0.04    0.15
  -6  -6   2   -0.08    0.14
  -6  -6   2   -0.09    0.17
  -6  -6   2   -0.31    0.20
  -6  -6   2   -0.13    0.12
  -6  -6   2    0.20    0.12
  -6   6   2    0.09    0.18
   6   6  -2    0.35    0.16
  -6   6   2    0.14    0.22
  -6   6   2   -0.26    0.21
  -6   6   2   -0.10    0.15
  -5  -6   2   30.52    0.61
  -5  -6   2   31.90    0.74
  -5  -6   2   31.68    0.66
   5  -6  -2   31.17    0.68
  -5  -6   2   30.45    0.69
   5  -6  -2   31.20    0.66
  -5  -6   2   31.68    0.64
   5   6  -2   32.41    0.75
  -5   6   2   31.68    0.68
  -5   6   2   31.96    0.71
  -5   6   2   31.52    0.78
  -4  -6   2   -0.31    0.16
  -4  -6   2   -0.24    0.18
  -4  -6   2   -0.08    0.13
   4  -6  -2    0.02    0.16
   4  -6  -2    0.06    0.14
   4   6  -2    0.23    0.15
  -4   6   2   -0.01    0.14
   4   6  -2   -0.07    0.11
  -4   6   2   -0.10    0.17
  -4   6   2   -0.20    0.18
   4   6  -2   -0.08    0.12
   3  -6  -2   13.91    0.30
  -3  -6   2   13.61    0.41
  -3  -6   2   13.54    0.40
  -3  -6   2   13.52    0.37
   3  -6  -2   13.93    0.38
   3  -6  -2   13.66    0.40
   3   6  -2   13.29    0.38
  -3   6   2   13.74    0.42
  -3   6   2   13.84    0.38
   3   6  -2   13.92    0.32
  -3   6   2   13.97    0.44
   3   6  -2   13.71    0.35
  -2  -6   2    0.89    0.15
   2  -6  -2    0.91    0.16
  -2  -6   2    0.88    0.18
   2  -6  -2    1.11    0.15
   2  -6  -2    0.82    0.14
  -2  -6   2    1.01    0.17
  -2   6   2    0.87    0.17
   2   6  -2    1.05    0.13
   2   6  -2    0.92    0.15
  -2   6   2    0.92    0.19
  -2   6   2    0.98    0.16
   2   6  -2    1.19    0.17
   1  -6  -2    2.76    0.18
  -1  -6   2    2.65    0.22
   1  -6  -2    2.66    0.22
  -1  -6   2    2.74    0.27
   1  -6  -2    2.61    0.26
  -1  -6   2    2.63    0.23
   1   6  -2    2.52    0.22
   1   6  -2    2.38    0.25
  -1   6   2    2.66    0.23
   1   6  -2    2.71    0.26
  -1   6   2    2.38    0.27
  -1   6   2    2.53    0.22
   0  -6   2    0.13    0.14
   0  -6  -2    0.15    0.14
   0  -6  -2    0.42    0.17
   0  -6  -2    0.32    0.14
   0  -6   2    0.25    0.18
   0  -6   2    0.12    0.14
   0   6   2    0.16    0.14
   0   6  -2    0.24    0.14
   0   6   2    0.10    0.12
   0   6  -2    0.25    0.14
   0   6  -2    0.28    0.17
   0   6   2    0.11    0.17
   1  -6   2   14.64    0.37
  -1  -6  -2   14.04    0.42
  -1  -6  -2   13.34    0.34
  -1  -6  -2   14.66    0.38
   1  -6   2   14.46    0.43
  -1   6  -2   14.63    0.38
  -1   6  -2   14.73    0.42
   1   6   2   14.52    0.42
  -1   6  -2   14.38    0.38
   1   6   2   14.73    0.38
   1   6   2   14.45    0.32
   2  -6   2   34.32    0.73
  -2  -6  -2   35.15    0.75
  -2  -6  -2   31.77    0.66
   2  -6   2   35.37    0.71
   2  -6   2   34.51    0.76
  -2  -6  -2   34.07    0.72
  -2   6  -2   34.70    0.70
   2   6   2   36.32    0.72
   2   6   2   34.49    0.75
   2   6   2   34.45    0.72
  -2   6  -2   34.71    0.73
  -2   6  -2   33.61    0.75
  -2   6  -2   33.81    0.75
   3  -6   2   74.39    1.41
  -3  -6  -2   74.04    1.42
  -3  -6  -2   71.71    1.36
   3  -6   2   76.50    1.46
  -3  -6  -2   75.11    1.45
   3  -6   2   74.61    1.44
   3   6   2   75.93    1.43
   3   6   2   74.69    1.42
  -3   6  -2   75.22    1.41
  -3   6  -2   75.00    1.48
  -3   6  -2   73.70    1.43
   3   6   2   73.92    1.44
  -3   6  -2   74.26    1.46
  -4  -6  -2    0.28    0.18
   4  -6   2    0.41    0.20
  -4  -6  -2    0.31    0.15
  -4  -6  -2    0.43    0.12
   4  -6   2    0.45    0.14
   4  -6   2    0.51    0.18
  -4   6  -2    0.36    0.20
  -4   6  -2    0.42    0.18
   4   6   2    0.53    0.15
   4   6   2    0.47    0.15
  -4   6  -2    0.48    0.13
  -4   6  -2    0.49    0.16
   4   6   2    0.30    0.17
   5  -6   2    2.42    0.22
   5  -6   2    2.87    0.27
  -5  -6  -2    2.76    0.29
  -5  -6  -2    2.53    0.22
   5  -6   2    2.58    0.29
  -5  -6  -2    2.47    0.23
  -5   6  -2    2.65    0.25
   5   6   2    2.80    0.27
  -5   6  -2    2.93    0.33
   5   6   2    2.65    0.24
  -5   6  -2    2.73    0.21
   5   6   2    2.75    0.26
  -5   6  -2    2.82    0.30
  -6  -6  -2    0.17    0.19
  -6  -6  -2   -0.09    0.15
  -6  -6  -2    0.17    0.15
   6  -6   2    0.17    0.19
   6  -6   2    0.37    0.21
   6   6   2   -0.11    0.17
  -6   6  -2    0.29    0.14
  -6   6  -2    0.02    0.20
   6   6   2   -0.17    0.17
  -6   6  -2    0.33    0.17
  -6   6  -2    0.02    0.21
   6   6   2   -0.07    0.19
  -7  -6  -2   16.30    0.46
   7  -6   2   16.61    0.48
   7  -6   2   16.68    0.50
  -7  -6  -2   16.54    0.50
  -7  -6  -2   15.88    0.46
  -7   6  -2   16.56    0.52
  -7   6  -2   16.18    0.59
   7   6   2   15.77    0.54
   7   6   2   16.25    0.46
  -7   6  -2   16.51    0.48
  -7   6  -2   15.94    0.43
   7   6   2   15.70    0.43
  -8  -6  -2   17.36    0.49
   8  -6   2   16.48    0.51
  -8  -6  -2   17.22    0.51
   8  -6   2   17.32    0.51
   8   6   2   17.28    0.58
  -8   6  -2   16.05    0.63
  -8   6  -2   16.51    0.46
  -8   6  -2   16.66    0.56
   8   6   2   16.92    0.46
   9  -6   2    1.17    0.24
  -9  -6  -2    0.66    0.32
   9  -6   2    0.87    0.24
  -9  -6  -2    0.87    0.23
  -9  -6  -2    1.10    0.23
  -9   6  -2    0.75    0.28
  -9   6  -2    0.48    0.24
   9   6   2    0.93    0.30
  -9   6  -2    0.84    0.20
  -9   6  -2    0.31    0.29
 -10  -6  -2    1.30    0.25
 -10  -6  -2    1.04    0.27
 -10  -6  -2    0.94    0.25
 -10   6  -2    1.07    0.33
  10   6   2    1.32    0.32
 -10   6  -2    0.72    0.40
 -10   6  -2    0.67    0.33
 -10   6  -2    0.73    0.26
 -11  -6  -2    3.42    0.40
 -11   6  -2    2.90    0.40
 -11   6  -2    3.16    0.44
  11   6   2    3.30    0.41
 -12  -6  -2    2.62    0.42
  12   6   2    2.44    0.58
 -12   6  -2    2.70    0.32
 -12   6  -2    2.50    0.37
 -12   6  -2    2.84    0.37
 -12   6  -2    2.69    0.46
 -13  -6  -2    6.23    0.50
 -13  -6  -2    6.50    0.55
 -13  -6  -2    8.37    0.51
 -13   6  -2    8.32    0.46
 -13   6  -2    6.80    0.73
 -13   6  -2    6.82    0.58
 -13   6  -2    6.06    0.53
 -14  -6  -2    2.20    0.37
 -14  -6  -2    2.32    0.45
 -14  -6  -2    2.58    0.37
 -14  -6  -2    2.24    0.48
 -14   6  -2    1.87    0.43
 -14   6  -2    1.32    0.43
 -14   6  -2    2.12    0.46
  14   6   2    1.94    0.54
 -14  -7   2    1.47    0.37
 -14  -7   2    1.98    0.52
 -14   7   2    2.26    0.39
 -14   7   2    1.51    0.57
 -13  -7   2   -0.30    0.30
 -13  -7   2    0.79    0.33
 -13  -7   2    0.09    0.42
 -13  -7   2   -0.03    0.34
 -13  -7   2    1.02    0.29
 -13   7   2    0.80    0.22
 -13   7   2    0.82    0.32
 -13   7   2    0.48    0.44
 -13   7   2    0.03    0.36
  13   7  -2    0.05    0.41
 -12  -7   2    0.98    0.31
 -12  -7   2    1.14    0.39
 -12  -7   2    1.49    0.27
  12   7  -2    0.39    0.33
 -12   7   2    0.92    0.44
 -12   7   2    1.16    0.20
 -12   7   2    0.81    0.28
 -12   7   2    0.75    0.34
 -11  -7   2    0.06    0.24
 -11  -7   2    0.67    0.25
 -11  -7   2   -0.04    0.35
  11   7  -2    0.24    0.29
 -11   7   2    0.08    0.37
 -11   7   2    0.17    0.31
 -11   7   2    0.44    0.25
 -10  -7   2    0.97    0.24
 -10  -7   2    0.25    0.31
 -10  -7   2    0.81    0.22
 -10  -7   2    0.74    0.20
 -10   7   2    0.86    0.26
 -10   7   2    0.93    0.40
  10   7  -2    0.78    0.30
 -10   7   2    1.07    0.28
  -9  -7   2    1.67    0.22
  -9  -7   2    1.74    0.21
  -9  -7   2    1.49    0.21
  -9  -7   2    2.01    0.26
  -9  -7   2    1.13    0.31
  -9   7   2    1.37    0.25
  -9   7   2    1.61    0.43
  -9   7   2    1.31    0.34
   9   7  -2    1.54    0.29
  -9   7   2    1.58    0.28
  -8  -7   2   11.12    0.38
  -8  -7   2   11.43    0.37
  -8  -7   2   10.57    0.43
  -8  -7   2   11.04    0.36
  -8  -7   2   11.04    0.51
  -8   7   2   11.35    0.41
   8   7  -2   11.51    0.45
  -8   7   2   10.70    0.57
  -8   7   2   11.38    0.47
  -8   7   2   10.52    0.56
   7  -7  -2    4.09    0.30
  -7  -7   2    3.58    0.22
  -7  -7   2    3.39    0.40
   7  -7  -2    3.78    0.28
  -7  -7   2    4.28    0.33
  -7  -7   2    4.11    0.28
  -7  -7   2    4.03    0.25
  -7   7   2    4.35    0.35
  -7   7   2    3.86    0.44
  -7   7   2    3.82    0.43
   7   7  -2    3.62    0.32
  -6  -7   2    0.09    0.16
  -6  -7   2    0.13    0.12
  -6  -7   2    0.32    0.21
   6  -7  -2    0.21    0.17
  -6  -7   2    0.11    0.23
   6  -7  -2    0.06    0.18
   6   7  -2    0.07    0.17
  -6   7   2    0.09    0.20
  -6   7   2   -0.05    0.17
  -6   7   2    0.26    0.45
  -6   7   2   -0.01    0.22
   5  -7  -2    0.86    0.18
  -5  -7   2    0.51    0.22
  -5  -7   2    0.80    0.19
   5  -7  -2    0.96    0.21
  -5  -7   2    0.85    0.16
   5   7  -2    0.91    0.15
  -5   7   2    0.69    0.17
   5   7  -2    0.78    0.17
  -5   7   2    0.83    0.20
  -5   7   2    0.46    0.23
   5   7  -2    0.80    0.14
  -4  -7   2    5.74    0.32
  -4  -7   2    6.55    0.34
   4  -7  -2    6.23    0.29
  -4  -7   2    5.90    0.27
   4  -7  -2    6.05    0.31
   4   7  -2    6.11    0.29
   4   7  -2    5.85    0.25
  -4   7   2    5.85    0.38
  -4   7   2    6.17    0.33
   4   7  -2    6.40    0.24
  -4   7   2    6.30    0.29
  -3  -7   2    0.37    0.15
  -3  -7   2    0.40    0.19
   3  -7  -2    0.18    0.10
   3  -7  -2    0.10    0.18
  -3  -7   2    0.09    0.19
   3  -7  -2    0.11    0.15
  -3   7   2    0.16    0.19
  -3   7   2    0.09    0.15
   3   7  -2    0.19    0.14
  -3   7   2    0.23    0.18
   3   7  -2    0.33    0.11
   3   7  -2    0.08    0.17
  -2  -7   2    0.70    0.20
  -2  -7   2    0.66    0.18
   2  -7  -2    1.15    0.17
   2  -7  -2    0.94    0.16
  -2  -7   2    0.61    0.16
   2  -7  -2    0.86    0.19
  -2   7   2    0.83    0.17
   2   7  -2    0.87    0.15
  -2   7   2    0.98    0.19
   2   7  -2    0.94    0.15
   2   7  -2    0.72    0.18
  -2   7   2    0.98    0.20
  -1  -7   2    0.03    0.18
  -1  -7   2   -0.10    0.16
   1  -7  -2    0.13    0.15
   1  -7  -2   -0.07    0.18
  -1  -7   2   -0.09    0.15
   1  -7  -2    0.00    0.13
   1   7  -2   -0.14    0.17
  -1   7   2    0.01    0.15
  -1   7   2   -0.04    0.16
   1   7  -2    0.13    0.16
   1   7  -2   -0.09    0.18
  -1   7   2    0.06    0.19
   0  -7  -2    4.85    0.25
   0  -7  -2    4.90    0.31
   0  -7   2    4.98    0.33
   0  -7   2    4.90    0.27
   0  -7   2    4.89    0.27
   0  -7  -2    4.97    0.27
   0   7   2    4.79    0.32
   0   7  -2    5.04    0.28
   0   7  -2    4.78    0.31
   0   7   2    4.40    0.23
   0   7   2    4.87    0.27
   0   7  -2    4.69    0.27
   1  -7   2    0.71    0.16
   1  -7   2    0.41    0.20
  -1  -7  -2    0.49    0.16
  -1  -7  -2    0.40    0.20
   1  -7   2    0.44    0.17
  -1   7  -2    0.47    0.15
  -1   7  -2    0.22    0.16
   1   7   2    0.58    0.10
   1   7   2    0.52    0.16
  -1   7  -2    0.39    0.20
   1   7   2    0.44    0.20
  -2  -7  -2    2.28    0.24
   2  -7   2    2.50    0.21
   2  -7   2    2.54    0.30
  -2  -7  -2    1.96    0.28
   2  -7   2    2.71    0.26
  -2  -7  -2    1.95    0.16
  -2   7  -2    2.37    0.22
   2   7   2    2.31    0.24
  -2   7  -2    2.09    0.25
   2   7   2    2.42    0.29
  -2   7  -2    1.93    0.29
   2   7   2    2.62    0.21
  -3  -7  -2    4.62    0.31
  -3  -7  -2    4.18    0.26
   3  -7   2    4.78    0.29
   3  -7   2    4.47    0.23
   3  -7   2    4.83    0.33
   3   7   2    4.72    0.31
  -3   7  -2    4.47    0.28
  -3   7  -2    4.52    0.32
  -3   7  -2    4.77    0.32
   3   7   2    4.44    0.26
  -3   7  -2    5.06    0.24
   3   7   2    5.02    0.25
   4  -7   2    5.10    0.30
   4  -7   2    5.27    0.34
   4  -7   2    5.30    0.25
  -4  -7  -2    5.04    0.32
  -4  -7  -2    5.47    0.27
  -4   7  -2    5.61    0.24
   4   7   2    5.24    0.28
  -4   7  -2    5.16    0.29
  -4   7  -2    5.43    0.35
  -4   7  -2    5.09    0.34
   4   7   2    5.74    0.32
   4   7   2    5.79    0.28
  -5  -7  -2    2.23    0.24
  -5  -7  -2    1.90    0.22
  -5  -7  -2    2.30    0.24
   5  -7   2    1.90    0.29
   5  -7   2    2.11    0.24
   5  -7   2    1.95    0.22
  -5   7  -2    2.06    0.21
   5   7   2    1.90    0.25
   5   7   2    1.98    0.23
  -5   7  -2    2.20    0.25
  -5   7  -2    2.12    0.35
   5   7   2    2.02    0.26
   6  -7   2   32.87    0.71
   6  -7   2   33.39    0.77
   6  -7   2   33.12    0.75
  -6  -7  -2   31.50    0.80
  -6  -7  -2   32.98    0.73
  -6  -7  -2   32.52    0.73
  -6   7  -2   32.61    0.79
   6   7   2   32.47    0.72
  -6   7  -2   33.30    0.85
   6   7   2   32.55    0.74
   6   7   2   32.69    0.95
  -6   7  -2   32.01    0.75
  -6   7  -2   33.56    0.70
   7  -7   2   10.32    0.44
  -7  -7  -2   10.36    0.39
  -7  -7  -2   10.43    0.38
  -7  -7  -2   10.56    0.46
   7  -7   2    9.87    0.42
   7   7   2    9.35    0.40
   7   7   2    9.88    0.44
   7   7   2   10.48    0.37
  -7   7  -2   10.49    0.53
  -7   7  -2   10.38    0.47
  -7   7  -2   10.59    0.35
  -7   7  -2   10.02    0.41
   8  -7   2    2.72    0.37
  -8  -7  -2    3.50    0.32
   8  -7   2    3.35    0.37
  -8  -7  -2    3.38    0.34
   8   7   2    3.52    0.39
  -8   7  -2    3.67    0.28
  -8   7  -2    3.62    0.48
   8   7   2    3.40    0.29
   8   7   2    3.75    0.31
  -8   7  -2    2.89    0.41
  -8   7  -2    3.10    0.36
   9  -7   2    1.81    0.27
  -9  -7  -2    1.82    0.29
  -9  -7  -2    1.57    0.24
   9  -7   2    1.82    0.28
  -9  -7  -2    1.83    0.25
  -9   7  -2    1.35    0.30
   9   7   2    1.82    0.29
  -9   7  -2    1.45    0.37
  -9   7  -2    1.83    0.29
  -9   7  -2    1.87    0.29
 -10  -7  -2   -0.24    0.22
  10  -7   2   -0.10    0.26
 -10  -7  -2   -0.05    0.26
 -10  -7  -2    0.12    0.26
  10  -7   2   -0.31    0.25
 -10   7  -2    0.61    0.37
  10   7   2    0.16    0.34
 -10   7  -2    0.52    0.28
 -10   7  -2    0.10    0.33
 -11  -7  -2    0.10    0.39
 -11  -7  -2   -0.22    0.32
 -11  -7  -2    0.35    0.28
 -11   7  -2    0.25    0.35
 -11   7  -2    0.44    0.28
  11   7   2    0.27    0.32
 -11   7  -2    0.11    0.28
 -11   7  -2   -0.04    0.32
 -12  -7  -2    8.64    0.52
 -12  -7  -2   10.38    0.52
 -12   7  -2    9.27    0.60
 -12   7  -2    8.25    0.56
 -12   7  -2    9.93    0.46
 -12   7  -2    9.81    0.71
 -13  -7  -2    1.62    0.34
 -13  -7  -2    2.19    0.33
 -13  -7  -2    1.78    0.41
 -13   7  -2    1.02    0.41
 -13   7  -2    2.90    0.43
 -13   7  -2    0.80    0.53
  13   7   2    1.82    0.37
 -13   7  -2    1.83    0.41
 -14  -7  -2    2.56    0.53
 -14  -7  -2    4.81    0.57
 -14   7  -2    3.98    0.63
 -14   7  -2    3.07    0.52
  14   7   2    4.00    0.70
 -14   7  -2    4.28    0.78
 -13  -8   2    1.33    0.38
 -13  -8   2    1.10    0.36
 -13  -8   2    1.31    0.31
 -13  -8   2    0.70    0.32
 -13  -8   2    1.59    0.48
 -13   8   2    1.05    0.38
  13   8  -2    1.27    0.41
 -13   8   2    0.18    0.39
 -13   8   2    0.39    0.53
 -12  -8   2    0.41    0.41
 -12  -8   2    0.43    0.45
 -12  -8   2    0.65    0.28
 -12  -8   2    0.22    0.34
 -12  -8   2    0.04    0.27
 -12   8   2    0.28    0.37
  12   8  -2   -0.36    0.36
 -12   8   2   -0.54    0.31
 -12   8   2   -0.15    0.48
 -11  -8   2   14.98    0.59
 -11  -8   2   15.36    0.69
 -11  -8   2   15.08    0.51
 -11  -8   2   15.20    0.52
 -11  -8   2   16.37    0.54
 -11   8   2   15.54    0.63
 -11   8   2   14.92    0.55
 -11   8   2   15.47    0.79
  11   8  -2   14.58    0.61
 -10  -8   2    0.55    0.37
 -10  -8   2    0.64    0.22
 -10  -8   2    0.80    0.24
 -10  -8   2    0.97    0.21
 -10  -8   2    0.72    0.28
 -10   8   2    0.81    0.30
  10   8  -2    0.18    0.31
 -10   8   2    0.31    0.28
 -10   8   2    0.46    0.26
 -10   8   2    0.44    0.36
  -9  -8   2    6.38    0.37
  -9  -8   2    6.16    0.50
  -9  -8   2    6.51    0.31
  -9  -8   2    6.68    0.33
  -9  -8   2    6.32    0.43
  -9   8   2    7.27    0.57
   9   8  -2    6.16    0.44
  -9   8   2    6.24    0.68
  -9   8   2    6.65    0.46
  -9   8   2    6.34    0.40
  -8  -8   2    0.34    0.14
  -8  -8   2    0.02    0.20
  -8  -8   2   -0.16    0.31
   8  -8  -2    0.20    0.22
   8  -8  -2    0.16    0.21
  -8  -8   2    0.24    0.32
  -8  -8   2    0.20    0.17
   8   8  -2    0.46    0.24
  -8   8   2    0.55    0.27
  -8   8   2   -0.18    0.32
  -8   8   2   -0.14    0.29
  -8   8   2   -0.09    0.22
  -7  -8   2    1.94    0.27
   7  -8  -2    2.20    0.24
  -7  -8   2    1.97    0.23
  -7  -8   2    1.87    0.23
  -7  -8   2    1.36    0.29
   7  -8  -2    2.26    0.25
  -7   8   2    1.59    0.32
  -7   8   2    2.43    0.30
   7   8  -2    1.86    0.24
  -7   8   2    2.25    0.29
  -7   8   2    2.25    0.33
  -6  -8   2    8.31    0.40
   6  -8  -2    7.47    0.35
  -6  -8   2    7.62    0.34
  -6  -8   2    7.70    0.43
   6  -8  -2    6.92    0.37
  -6   8   2    7.22    0.41
  -6   8   2    7.37    0.37
   6   8  -2    7.87    0.34
  -6   8   2    7.19    0.48
   6   8  -2    7.29    0.28
  -6   8   2    7.66    0.48
   6   8  -2    7.44    0.33
   5  -8  -2   12.65    0.45
  -5  -8   2   13.36    0.48
  -5  -8   2   13.09    0.41
  -5  -8   2   13.58    0.46
   5  -8  -2   13.59    0.41
   5   8  -2   12.57    0.37
   5   8  -2   13.04    0.41
   5   8  -2   13.04    0.37
  -5   8   2   13.46    0.56
  -5   8   2   14.23    0.44
  -5   8   2   13.10    0.47
   4  -8  -2    0.48    0.18
   4  -8  -2    0.22    0.20
  -4  -8   2   -0.03    0.19
   4  -8  -2    0.21    0.11
  -4  -8   2   -0.03    0.21
  -4  -8   2   -0.01    0.16
   4   8  -2   -0.02    0.16
   4   8  -2    0.18    0.18
   4   8  -2    0.26    0.13
  -4   8   2    0.35    0.21
  -4   8   2    0.41    0.24
   3  -8  -2    1.53    0.17
  -3  -8   2    1.59    0.24
  -3  -8   2    1.68    0.21
  -3  -8   2    1.69    0.23
   3  -8  -2    1.71    0.19
   3  -8  -2    2.05    0.29
   3   8  -2    1.69    0.18
  -3   8   2    1.26    0.19
  -3   8   2    1.84    0.24
   3   8  -2    1.58    0.22
  -3   8   2    1.44    0.23
   3   8  -2    1.53    0.17
   2  -8  -2    4.88    0.28
  -2  -8   2    4.68    0.28
  -2  -8   2    4.64    0.33
   2  -8  -2    4.62    0.32
   2  -8  -2    4.60    0.22
  -2  -8   2    4.55    0.30
  -2   8   2    4.50    0.28
   2   8  -2    4.09    0.31
   2   8  -2    5.30    0.29
  -2   8   2    4.49    0.30
   2   8  -2    4.42    0.26
  -2   8   2    4.75    0.33
   1  -8  -2    2.22    0.24
  -1  -8   2    2.53    0.26
  -1  -8   2    2.20    0.30
   1  -8  -2    2.22    0.21
  -1  -8   2    2.48    0.25
   1  -8  -2    2.19    0.29
  -1   8   2    1.87    0.24
  -1   8   2    1.64    0.25
   1   8  -2    2.03    0.24
  -1   8   2    2.33    0.31
   1   8  -2    2.25    0.29
   0  -8   2    1.73    0.23
   0  -8  -2    1.80    0.22
   0  -8   2    1.93    0.24
   0  -8  -2    1.78    0.24
   0  -8   2    1.81    0.24
   0  -8  -2    2.08    0.30
   0   8   2    1.76    0.22
   0   8  -2    1.79    0.25
   0   8  -2    1.99    0.26
   0   8   2    1.65    0.21
   0   8   2    1.54    0.24
   0   8  -2    1.58    0.22
  -1  -8  -2    0.06    0.20
   1  -8   2   -0.24    0.16
   1  -8   2    0.10    0.20
   1  -8   2    0.14    0.15
  -1  -8  -2   -0.15    0.15
  -1  -8  -2    0.08    0.17
  -1   8  -2   -0.17    0.19
   1   8   2    0.19    0.16
   1   8   2   -0.09    0.19
   1   8   2   -0.06    0.10
  -1   8  -2   -0.32    0.16
  -1   8  -2   -0.20    0.14
   2  -8   2    1.45    0.17
  -2  -8  -2    1.05    0.20
  -2  -8  -2    1.32    0.18
   2  -8   2    1.06    0.23
   2  -8   2    1.47    0.20
   2   8   2    1.44    0.22
  -2   8  -2    1.42    0.23
   2   8   2    1.39    0.17
   2   8   2    1.32    0.19
  -2   8  -2    1.47    0.23
  -2   8  -2    1.04    0.18
   3  -8   2   13.70    0.43
  -3  -8  -2   13.41    0.41
  -3  -8  -2   13.60    0.48
   3  -8   2   13.53    0.38
   3  -8   2   13.54    0.52
  -3   8  -2   14.28    0.47
  -3   8  -2   13.71    0.39
   3   8   2   14.07    0.41
  -3   8  -2   13.92    0.57
   3   8   2   13.58    0.45
   3   8   2   13.72    0.40
  -3   8  -2   13.48    0.46
   4  -8   2    1.65    0.23
  -4  -8  -2    1.43    0.19
   4  -8   2    1.89    0.46
   4  -8   2    1.92    0.23
  -4   8  -2    1.42    0.24
   4   8   2    1.55    0.23
   4   8   2    1.56    0.25
  -4   8  -2    1.74    0.21
   4   8   2    1.70    0.26
  -4   8  -2    1.62    0.25
  -4   8  -2    1.78    0.22
   5  -8   2    1.57    0.24
  -5  -8  -2    1.87    0.27
   5  -8   2    1.87    0.27
  -5  -8  -2    2.27    0.26
   5  -8   2    2.18    0.25
  -5   8  -2    2.29    0.35
   5   8   2    2.51    0.35
  -5   8  -2    1.91    0.24
   5   8   2    1.90    0.28
  -5   8  -2    2.02    0.29
  -5   8  -2    1.81    0.34
   5   8   2    2.03    0.25
   6  -8   2    4.59    0.37
  -6  -8  -2    4.13    0.33
  -6  -8  -2    4.35    0.46
   6  -8   2    4.28    0.39
   6  -8   2    4.34    0.30
  -6  -8  -2    4.44    0.28
  -6   8  -2    4.40    0.28
  -6   8  -2    4.02    0.34
   6   8   2    4.26    0.31
  -6   8  -2    4.11    0.46
   6   8   2    3.69    0.36
  -6   8  -2    4.34    0.41
   6   8   2    3.90    0.34
  -7  -8  -2    0.04    0.24
   7  -8   2    0.48    0.26
   7  -8   2    0.47    0.25
  -7  -8  -2    0.40    0.17
  -7  -8  -2    0.58    0.22
  -7   8  -2    0.62    0.19
   7   8   2    0.75    0.25
  -7   8  -2    0.35    0.22
   7   8   2    0.85    0.21
  -7   8  -2    0.63    0.27
  -7   8  -2    0.51    0.30
  -8  -8  -2    0.23    0.22
  -8  -8  -2    0.14    0.20
   8  -8   2   -0.19    0.26
   8  -8   2    0.12    0.28
  -8  -8  -2    0.80    0.29
  -8   8  -2    0.05    0.25
   8   8   2    0.02    0.37
   8   8   2    0.43    0.24
  -8   8  -2   -0.08    0.29
  -8   8  -2    0.21    0.19
   8   8   2    0.42    0.21
  -8   8  -2    0.07    0.33
   9  -8   2   -0.04    0.27
  -9  -8  -2    0.09    0.25
  -9  -8  -2    0.08    0.22
   9  -8   2    0.48    0.28
  -9  -8  -2    0.07    0.30
   9   8   2    0.01    0.30
  -9   8  -2   -0.29    0.25
  -9   8  -2   -0.40    0.31
  -9   8  -2    0.05    0.23
 -10  -8  -2   -0.32    0.30
 -10  -8  -2    0.03    0.32
  10  -8   2   -0.07    0.28
 -10  -8  -2   -0.23    0.23
 -10   8  -2   -0.37    0.32
 -10   8  -2   -0.38    0.28
  10   8   2    0.37    0.31
 -10   8  -2    0.52    0.37
 -10   8  -2   -0.11    0.33
 -11  -8  -2    0.23    0.25
 -11  -8  -2    0.36    0.30
 -11  -8  -2    0.39    0.33
 -11   8  -2    0.06    0.31
 -11   8  -2    0.99    0.41
 -11   8  -2    0.00    0.37
 -11   8  -2    0.03    0.25
  11   8   2    0.32    0.38
 -12  -8  -2    1.17    0.39
 -12  -8  -2    1.42    0.30
 -12  -8  -2    1.50    0.56
 -12  -8  -2    1.01    0.32
 -12   8  -2    1.60    0.39
 -12   8  -2    0.64    0.39
 -12   8  -2    1.30    0.48
 -12   8  -2    1.65    0.28
 -13  -8  -2    5.20    0.49
 -13  -8  -2    3.20    0.38
 -13   8  -2    3.10    0.46
 -13   8  -2    3.88    0.56
 -13   8  -2    3.86    0.60
  13   8   2    3.62    0.68
 -13   8  -2    4.15    0.44
 -13  -9   2    0.76    0.34
 -13  -9   2    0.02    0.49
 -13  -9   2    0.74    0.39
 -13  -9   2    0.75    0.43
 -13   9   2    0.67    0.43
  13   9  -2    0.59    0.48
 -13   9   2   -0.36    0.54
 -13   9   2   -0.20    0.39
 -12  -9   2    2.55    0.40
 -12  -9   2    3.45    0.37
 -12  -9   2    2.79    0.42
 -12  -9   2    1.86    0.49
 -12  -9   2    3.09    0.39
 -12   9   2    4.23    0.70
 -12   9   2    2.02    0.39
  12   9  -2    1.25    0.43
 -12   9   2    2.30    0.37
 -11  -9   2    0.50    0.22
 -11  -9   2    0.79    0.41
 -11  -9   2    0.71    0.34
 -11  -9   2    0.57    0.25
 -11  -9   2    0.49    0.29
 -11   9   2    0.50    0.30
 -11   9   2    0.13    0.31
  11   9  -2    0.85    0.34
 -11   9   2    1.37    0.41
 -10  -9   2    5.90    0.56
 -10  -9   2    6.58    0.31
 -10  -9   2    6.11    0.49
 -10  -9   2    7.18    0.42
 -10  -9   2    6.57    0.37
 -10   9   2    6.51    0.45
 -10   9   2    5.24    0.73
 -10   9   2    5.80    0.51
 -10   9   2    5.67    0.66
  10   9  -2    5.48    0.60
   9  -9  -2    0.31    0.24
  -9  -9   2   -0.01    0.18
  -9  -9   2    0.05    0.25
  -9  -9   2   -0.19    0.30
  -9  -9   2   -0.15    0.34
   9  -9  -2    0.06    0.24
  -9   9   2    0.35    0.38
   9   9  -2   -0.19    0.27
  -9   9   2    0.36    0.30
  -8  -9   2    7.28    0.50
   8  -9  -2    6.19    0.38
   8  -9  -2    6.94    0.42
  -8  -9   2    6.86    0.38
  -8  -9   2    6.14    0.42
  -8   9   2    6.80    0.56
  -8   9   2    6.65    0.48
  -8   9   2    6.25    0.60
  -8   9   2    6.34    0.41
  -7  -9   2    0.77    0.31
  -7  -9   2    0.62    0.22
   7  -9  -2    0.89    0.25
   7  -9  -2    0.86    0.23
  -7   9   2    0.52    0.34
  -7   9   2    0.81    0.26
   7   9  -2    0.61    0.22
  -7   9   2    1.01    0.31
  -6  -9   2    0.79    0.30
  -6  -9   2    0.23    0.25
   6  -9  -2    0.17    0.22
  -6  -9   2   -0.10    0.20
  -6   9   2    0.33    0.28
   6   9  -2   -0.01    0.21
  -6   9   2   -0.03    0.22
   6   9  -2    0.08    0.17
  -6   9   2    0.24    0.29
  -6   9   2    0.18    0.30
   6   9  -2    0.17    0.19
  -5  -9   2    1.37    0.26
  -5  -9   2    1.89    0.28
  -5  -9   2    1.63    0.23
   5  -9  -2    1.92    0.24
   5   9  -2    1.91    0.20
  -5   9   2    1.67    0.23
   5   9  -2    1.60    0.19
   5   9  -2    1.70    0.24
  -5   9   2    1.99    0.29
  -5   9   2    2.15    0.44
   4  -9  -2   13.14    0.34
   4  -9  -2   13.73    0.51
   4  -9  -2   13.43    0.44
  -4  -9   2   13.11    0.48
  -4  -9   2   12.85    0.48
  -4  -9   2   12.64    0.43
  -4   9   2   13.17    0.49
   4   9  -2   12.86    0.36
   4   9  -2   13.27    0.45
  -4   9   2   12.57    0.49
   4   9  -2   13.57    0.47
  -4   9   2   12.74    0.49
  -3  -9   2   12.50    0.41
  -3  -9   2   12.01    0.44
   3  -9  -2   11.43    0.33
  -3  -9   2   12.18    0.47
   3  -9  -2   12.26    0.47
   3  -9  -2   11.67    0.41
  -3   9   2   11.75    0.46
   3   9  -2   12.32    0.33
   3   9  -2   12.19    0.39
  -3   9   2   12.22    0.46
   3   9  -2   11.28    0.43
   2  -9  -2    4.33    0.23
  -2  -9   2    4.01    0.30
   2  -9  -2    4.68    0.34
  -2  -9   2    4.41    0.31
   2  -9  -2    4.10    0.29
  -2  -9   2    4.54    0.37
   2   9  -2    4.11    0.28
  -2   9   2    4.43    0.30
   2   9  -2    4.65    0.22
   2   9  -2    4.49    0.34
  -2   9   2    4.39    0.36
   1  -9  -2    0.05    0.17
  -1  -9   2   -0.02    0.17
  -1  -9   2    0.09    0.22
   1  -9  -2   -0.08    0.21
  -1  -9   2    0.31    0.18
   1  -9  -2    0.01    0.15
  -1   9   2   -0.07    0.16
  -1   9   2    0.04    0.21
   1   9  -2   -0.03    0.18
  -1   9   2   -0.03    0.17
   1   9  -2   -0.09    0.20
   1   9  -2   -0.04    0.12
   0  -9   2    8.44    0.34
   0  -9  -2    8.82    0.40
   0  -9   2    8.87    0.41
   0  -9   2    8.53    0.34
   0  -9  -2    8.69    0.33
   0  -9  -2    8.69    0.34
   0   9  -2    8.74    0.36
   0   9   2    8.26    0.29
   0   9   2    8.94    0.35
   0   9  -2    9.27    0.52
   0   9   2    8.64    0.41
   0   9  -2    8.67    0.40
  -1  -9  -2    1.68    0.25
   1  -9   2    1.71    0.25
  -1  -9  -2    1.74    0.26
   1  -9   2    1.92    0.25
  -1  -9  -2    1.69    0.26
   1  -9   2    1.83    0.21
   1   9   2    2.06    0.26
  -1   9  -2    1.54    0.20
  -1   9  -2    1.79    0.27
  -1   9  -2    1.76    0.24
   1   9   2    1.60    0.25
   1   9   2    1.42    0.16
   2  -9   2    1.09    0.24
  -2  -9  -2    1.43    0.20
   2  -9   2    1.47    0.19
   2  -9   2    1.31    0.20
  -2  -9  -2    1.67    0.23
  -2  -9  -2    0.97    0.22
  -2   9  -2    1.42    0.20
  -2   9  -2    1.42    0.25
  -2   9  -2    1.08    0.22
   2   9   2    1.46    0.18
   2   9   2    1.33    0.25
   2   9   2    1.46    0.21
   3  -9   2   11.21    0.36
   3  -9   2   11.58    0.43
  -3  -9  -2   11.36    0.40
  -3   9  -2   11.49    0.47
   3   9   2   11.29    0.45
  -3   9  -2   10.92    0.42
   3   9   2   11.23    0.42
  -3   9  -2   11.15    0.37
   3   9   2   11.63    0.41
  -3   9  -2   10.85    0.46
  -4  -9  -2   23.38    0.69
  -4  -9  -2   24.08    0.61
   4  -9   2   24.35    0.63
   4  -9   2   21.95    0.77
   4  -9   2   24.34    0.57
  -4   9  -2   24.15    0.62
  -4   9  -2   24.26    0.57
  -4   9  -2   24.44    0.69
   4   9   2   24.33    0.60
   4   9   2   24.03    0.65
   4   9   2   25.57    0.68
  -4   9  -2   24.36    0.68
  -5  -9  -2    4.35    0.35
   5  -9   2    4.63    0.41
  -5  -9  -2    4.38    0.40
   5  -9   2    4.67    0.38
   5  -9   2    4.73    0.30
  -5   9  -2    4.46    0.46
  -5   9  -2    4.76    0.36
  -5   9  -2    4.72    0.42
   5   9   2    4.21    0.40
   5   9   2    5.08    0.34
  -5   9  -2    4.85    0.29
  -6  -9  -2   14.33    0.54
   6  -9   2   14.16    0.53
   6  -9   2   14.95    0.56
   6  -9   2   15.39    0.45
  -6  -9  -2   14.71    0.49
  -6   9  -2   14.74    0.44
   6   9   2   13.70    0.58
   6   9   2   14.38    0.52
   6   9   2   14.55    0.50
  -6   9  -2   14.49    0.51
  -6   9  -2   15.10    0.58
  -6   9  -2   14.78    0.63
   7  -9   2    0.05    0.22
   7  -9   2    0.17    0.29
  -7  -9  -2   -0.09    0.21
  -7  -9  -2   -0.18    0.27
   7  -9   2    0.04    0.26
   7   9   2   -0.04    0.26
  -7   9  -2    0.23    0.25
  -7   9  -2    0.13    0.19
   7   9   2    0.16    0.23
  -7   9  -2    0.36    0.36
   7   9   2   -0.25    0.25
  -7   9  -2    0.42    0.30
   8  -9   2   -0.11    0.28
  -8  -9  -2    0.04    0.20
  -8  -9  -2   -0.17    0.30
   8  -9   2    0.31    0.29
  -8  -9  -2   -0.04    0.22
  -8   9  -2   -0.20    0.26
  -8   9  -2    0.28    0.33
   8   9   2    0.31    0.30
   8   9   2    0.00    0.26
   8   9   2   -0.05    0.23
  -8   9  -2    0.10    0.30
  -8   9  -2    0.01    0.20
  -9  -9  -2    0.03    0.30
  -9  -9  -2   -0.05    0.20
   9  -9   2    0.00    0.31
   9  -9   2    0.62    0.28
  -9   9  -2   -0.10    0.28
  -9   9  -2    0.00    0.33
  -9   9  -2   -0.10    0.21
   9   9   2    0.31    0.30
  -9   9  -2    0.29    0.40
 -10  -9  -2    2.21    0.34
 -10  -9  -2    2.05    0.30
 -10  -9  -2    2.06    0.28
 -10  -9  -2    2.33    0.37
  10  -9   2    2.49    0.35
 -10   9  -2    2.19    0.33
 -10   9  -2    2.35    0.45
 -10   9  -2    2.54    0.43
  10   9   2    2.01    0.41
 -10   9  -2    2.56    0.37
  11  -9   2    0.21    0.46
 -11  -9  -2    0.08    0.30
  11  -9   2    0.22    0.31
 -11  -9  -2   -0.34    0.28
 -11  -9  -2    1.04    0.34
 -11   9  -2    0.42    0.37
 -11   9  -2   -0.29    0.40
 -11   9  -2    0.13    0.25
 -11   9  -2   -0.21    0.33
  11   9   2   -0.16    0.37
 -12  -9  -2    1.49    0.33
 -12  -9  -2    1.54    0.29
 -12  -9  -2    1.42    0.41
 -12   9  -2    1.41    0.49
 -12   9  -2    1.36    0.30
 -12   9  -2    2.50    0.42
 -12   9  -2    1.40    0.40
 -13  -9  -2    3.47    0.52
 -13  -9  -2    3.09    0.41
 -13   9  -2    3.46    0.49
 -13   9  -2    3.52    0.60
  13   9   2    2.97    0.54
 -12 -10   2    0.85    0.42
 -12 -10   2    1.42    0.34
 -12 -10   2    1.02    0.46
 -12  10   2    1.28    0.43
  12  10  -2    1.55    0.45
 -12  10   2    0.96    0.50
 -12  10   2    1.13    0.45
 -11 -10   2    3.80    0.57
 -11 -10   2    4.77    0.40
 -11 -10   2    3.72    0.44
 -11 -10   2    5.50    0.51
 -11  10   2    3.80    0.57
 -11  10   2    3.63    0.55
 -11  10   2    3.52    0.54
  11  10  -2    3.52    0.57
 -10 -10   2    4.98    0.44
 -10 -10   2    4.26    0.54
 -10 -10   2    5.45    0.49
 -10  10   2    4.87    0.71
 -10  10   2    4.76    0.47
 -10  10   2    4.51    0.78
 -10  10   2    4.45    0.52
  10  10  -2    4.34    0.66
  -9 -10   2    3.27    0.40
  -9 -10   2    3.43    0.47
   9 -10  -2    3.32    0.47
  -9 -10   2    2.95    0.38
   9 -10  -2    2.95    0.39
  -9  10   2    3.00    0.43
  -9  10   2    3.78    0.61
  -9  10   2    3.22    0.49
   9  10  -2    3.59    0.44
   8 -10  -2    2.03    0.31
  -8 -10   2    1.48    0.31
  -8 -10   2    1.51    0.37
  -8 -10   2    1.67    0.28
   8 -10  -2    1.81    0.28
  -8  10   2    1.72    0.39
  -8  10   2    1.51    0.29
  -8  10   2    1.38    0.33
  -8  10   2    1.96    0.52
   8  10  -2    1.55    0.27
  -7 -10   2    5.42    0.45
  -7 -10   2    5.55    0.38
  -7 -10   2    5.97    0.49
   7 -10  -2    5.35    0.41
   7  10  -2    4.98    0.30
   7  10  -2    5.55    0.35
  -7  10   2    4.78    0.53
  -7  10   2    5.69    0.57
  -7  10   2    4.92    0.40
   7  10  -2    5.66    0.37
  -7  10   2    4.92    0.61
  -6 -10   2    0.19    0.28
   6 -10  -2   -0.14    0.27
  -6 -10   2    0.30    0.24
   6 -10  -2    0.43    0.24
  -6 -10   2    0.29    0.30
   6  10  -2    0.36    0.25
   6  10  -2    0.47    0.20
  -6  10   2    0.36    0.28
   6  10  -2    0.76    0.21
  -6  10   2    0.42    0.24
  -6  10   2    0.96    0.34
   5 -10  -2    1.85    0.27
  -5 -10   2    1.15    0.30
  -5 -10   2    0.92    0.30
  -5 -10   2    1.22    0.25
  -5  10   2    1.03    0.25
   5  10  -2    1.56    0.27
   5  10  -2    1.63    0.27
   5  10  -2    1.45    0.23
  -5  10   2    1.08    0.29
   4 -10  -2   23.40    0.67
  -4 -10   2   23.60    0.67
  -4 -10   2   23.05    0.67
   4 -10  -2   23.18    0.63
   4 -10  -2   23.89    0.53
  -4 -10   2   23.48    0.63
   4  10  -2   23.62    0.65
  -4  10   2   23.53    0.69
  -4  10   2   24.10    0.79
   4  10  -2   22.79    0.54
   4  10  -2   23.01    0.64
  -4  10   2   22.80    0.63
  -3 -10   2    0.02    0.22
   3 -10  -2    0.36    0.26
   3 -10  -2    0.39    0.22
  -3 -10   2    0.17    0.25
   3 -10  -2   -0.04    0.16
  -3 -10   2    0.27    0.28
  -3  10   2    0.12    0.23
   3  10  -2    0.28    0.22
   3  10  -2    0.30    0.26
  -3  10   2   -0.17    0.25
   3  10  -2    0.32    0.15
  -3  10   2    0.19    0.22
   2 -10  -2    4.74    0.40
   2 -10  -2    4.18    0.27
  -2 -10   2    4.18    0.35
  -2 -10   2    4.15    0.40
   2 -10  -2    3.95    0.34
  -2 -10   2    4.24    0.36
   2  10  -2    3.81    0.38
  -2  10   2    4.21    0.40
   2  10  -2    4.42    0.24
   2  10  -2    3.72    0.32
  -2  10   2    4.46    0.34
  -2  10   2    3.62    0.33
   1 -10  -2   11.52    0.49
  -1 -10   2   10.55    0.48
  -1 -10   2   11.67    0.42
  -1 -10   2   11.23    0.43
   1 -10  -2   10.91    0.37
   1 -10  -2   11.09    0.42
  -1  10   2   10.88    0.47
  -1  10   2   11.05    0.38
   1  10  -2   10.10    0.29
  -1  10   2   11.57    0.42
   1  10  -2   11.10    0.47
   0 -10  -2    5.47    0.31
   0 -10  -2    5.28    0.34
   0 -10   2    5.43    0.33
   0 -10   2    5.08    0.41
   0 -10   2    5.75    0.35
   0 -10  -2    6.12    0.42
   0  10   2    5.25    0.42
   0  10  -2    5.02    0.34
   0  10   2    5.32    0.26
   0  10  -2    5.49    0.40
   0  10   2    5.09    0.34
  -1 -10  -2    2.58    0.30
   1 -10   2    2.32    0.29
  -1 -10  -2    2.08    0.29
   1 -10   2    2.22    0.29
  -1 -10  -2    2.47    0.30
   1 -10   2    2.66    0.33
   1  10   2    2.62    0.31
  -1  10  -2    2.63    0.32
  -1  10  -2    2.20    0.24
   1  10   2    2.60    0.38
   1  10   2    2.46    0.19
  -1  10  -2    2.35    0.30
  -2 -10  -2    0.67    0.21
  -2 -10  -2    0.22    0.24
  -2 -10  -2    0.86    0.23
   2 -10   2    0.86    0.20
   2 -10   2    1.07    0.27
   2 -10   2    0.58    0.20
   2  10   2    0.81    0.27
  -2  10  -2    0.82    0.21
  -2  10  -2    0.65    0.22
   2  10   2    0.92    0.23
   2  10   2    1.01    0.23
  -2  10  -2    0.68    0.26
   3 -10   2    7.46    0.34
  -3 -10  -2    7.52    0.43
  -3 -10  -2    8.03    0.45
  -3 -10  -2    7.55    0.39
   3 -10   2    7.89    0.42
   3 -10   2    8.10    0.46
   3  10   2    7.87    0.36
  -3  10  -2    7.21    0.45
   3  10   2    8.10    0.38
   3  10   2    7.67    0.46
  -3  10  -2    7.74    0.46
  -3  10  -2    7.89    0.40
  -3  10  -2    7.72    0.35
  -4 -10  -2    5.48    0.37
  -4 -10  -2    5.45    0.44
   4 -10   2    5.21    0.31
   4 -10   2    5.18    0.40
   4 -10   2    5.57    0.44
  -4 -10  -2    5.24    0.43
   4  10   2    5.47    0.45
   4  10   2    5.42    0.38
  -4  10  -2    5.41    0.33
  -4  10  -2    5.57    0.47
  -4  10  -2    5.26    0.38
  -4  10  -2    5.89    0.45
   4  10   2    6.16    0.35
   5 -10   2    2.10    0.32
  -5 -10  -2    2.27    0.31
   5 -10   2    2.64    0.38
  -5 -10  -2    2.32    0.35
   5 -10   2    2.45    0.24
  -5  10  -2    2.24    0.33
   5  10   2    2.25    0.31
   5  10   2    2.25    0.40
  -5  10  -2    2.27    0.35
  -5  10  -2    1.78    0.26
  -5  10  -2    2.13    0.30
   5  10   2    2.32    0.33
  -6 -10  -2    4.83    0.38
   6 -10   2    4.60    0.44
  -6 -10  -2    3.70    0.45
   6 -10   2    5.27    0.33
  -6  10  -2    5.45    0.43
   6  10   2    4.64    0.44
  -6  10  -2    5.04    0.54
  -6  10  -2    4.95    0.32
   6  10   2    4.39    0.49
   7 -10   2    5.18    0.45
  -7 -10  -2    4.10    0.51
  -7 -10  -2    4.54    0.47
   7 -10   2    4.64    0.47
   7 -10   2    4.74    0.35
  -7  10  -2    4.46    0.33
  -7  10  -2    4.45    0.52
   7  10   2    4.55    0.51
   7  10   2    4.61    0.44
   7  10   2    4.56    0.37
  -7  10  -2    4.00    0.42
  -7  10  -2    5.32    0.51
   8 -10   2    2.63    0.36
  -8 -10  -2    1.83    0.34
  -8 -10  -2    2.49    0.30
   8 -10   2    2.63    0.34
  -8  10  -2    2.29    0.33
  -8  10  -2    2.02    0.41
   8  10   2    2.55    0.30
  -8  10  -2    2.30    0.36
  -8  10  -2    2.26    0.26
   8  10   2    2.43    0.32
  -9 -10  -2    3.43    0.50
  -9 -10  -2    2.43    0.29
   9 -10   2    2.13    0.35
   9 -10   2    2.59    0.37
   9  10   2    2.56    0.31
   9  10   2    1.96    0.27
  -9  10  -2    2.40    0.39
   9  10   2    2.83    0.31
  -9  10  -2    2.32    0.34
  -9  10  -2    2.68    0.43
  -9  10  -2    2.29    0.26
 -10 -10  -2   -0.09    0.25
 -10 -10  -2   -0.31    0.28
  10 -10   2    0.40    0.35
  10 -10   2   -0.07    0.37
 -10 -10  -2   -0.30    0.37
 -10  10  -2    0.20    0.35
 -10  10  -2    0.44    0.34
 -10  10  -2    0.17    0.41
  10  10   2    0.27    0.34
  11 -10   2    1.54    0.40
 -11 -10  -2    1.01    0.30
 -11 -10  -2    2.24    0.38
  11 -10   2    1.21    0.37
 -11 -10  -2    1.72    0.45
 -11  10  -2    1.19    0.48
 -11  10  -2    0.92    0.40
  11  10   2    0.90    0.43
 -11  10  -2    1.55    0.43
 -11  10  -2    1.32    0.29
 -12 -10  -2    0.72    0.49
 -12  10  -2    0.59    0.53
 -12  10  -2    0.68    0.51
 -12 -11   2    0.81    0.35
 -12 -11   2   -0.88    0.55
 -12 -11   2   -0.18    0.53
 -12  11   2    0.29    0.43
 -12  11   2    0.49    0.56
 -11 -11   2    0.69    0.43
 -11 -11   2    0.27    0.34
 -11 -11   2    0.51    0.50
 -11  11   2    0.19    0.40
 -11  11   2    0.81    0.36
  11  11  -2   -0.16    0.45
 -11  11   2    0.04    0.59
 -10 -11   2    0.70    0.38
  10 -11  -2    0.41    0.31
 -10 -11   2    0.94    0.31
 -10 -11   2    0.12    0.43
 -10  11   2   -0.61    0.54
 -10  11   2   -0.23    0.34
 -10  11   2    0.77    0.37
  10  11  -2    0.15    0.44
   9 -11  -2    0.21    0.29
  -9 -11   2    0.52    0.30
  -9 -11   2    0.99    0.36
   9 -11  -2    0.09    0.44
  -9 -11   2    0.87    0.36
  -9  11   2    0.10    0.32
  -9  11   2    0.69    0.34
   9  11  -2    0.78    0.32
  -9  11   2    0.45    0.41
  -8 -11   2    1.37    0.34
   8 -11  -2    1.02    0.32
   8 -11  -2    1.31    0.33
  -8 -11   2    1.43    0.30
  -8 -11   2    1.37    0.36
  -8  11   2    0.76    0.35
  -8  11   2    1.07    0.30
  -8  11   2    1.76    0.40
   8  11  -2    1.47    0.30
  -7 -11   2    3.76    0.49
  -7 -11   2    3.34    0.39
   7 -11  -2    3.18    0.42
   7 -11  -2    3.70    0.45
  -7  11   2    3.56    0.49
  -7  11   2    3.43    0.42
   7  11  -2    3.45    0.38
   7  11  -2    3.56    0.37
   7  11  -2    3.60    0.34
  -7  11   2    3.46    0.41
  -7  11   2    3.74    0.57
  -6 -11   2    3.92    0.40
   6 -11  -2    3.83    0.41
   6 -11  -2    3.69    0.41
  -6 -11   2    3.28    0.46
  -6 -11   2    3.75    0.46
   6  11  -2    4.12    0.40
  -6  11   2    3.63    0.49
   6  11  -2    3.46    0.33
  -6  11   2    3.37    0.52
   6  11  -2    3.85    0.43
  -6  11   2    3.26    0.40
  -6  11   2    3.25    0.51
   5 -11  -2   -0.38    0.26
  -5 -11   2   -0.16    0.23
   5 -11  -2   -0.16    0.16
  -5 -11   2   -0.24    0.31
  -5 -11   2    0.08    0.29
   5 -11  -2   -0.06    0.27
   5  11  -2   -0.08    0.27
   5  11  -2   -0.15    0.22
  -5  11   2   -0.02    0.51
   5  11  -2   -0.07    0.18
  -5  11   2   -0.44    0.25
  -5  11   2   -0.53    0.29
  -4 -11   2    1.02    0.27
  -4 -11   2    0.59    0.31
   4 -11  -2    1.52    0.29
   4 -11  -2    0.90    0.18
  -4 -11   2    0.54    0.28
   4 -11  -2    1.23    0.32
   4  11  -2    0.68    0.29
  -4  11   2    1.05    0.27
   4  11  -2    1.11    0.18
  -4  11   2    0.84    0.30
  -4  11   2    0.95    0.37
  -3 -11   2   16.61    0.61
   3 -11  -2   17.09    0.61
  -3 -11   2   17.20    0.55
  -3 -11   2   16.60    0.58
   3 -11  -2   17.35    0.56
   3 -11  -2   16.23    0.45
  -3  11   2   16.84    0.58
   3  11  -2   16.84    0.59
  -3  11   2   16.95    0.55
   3  11  -2   16.97    0.45
  -3  11   2   17.09    0.62
  -2 -11   2    2.99    0.44
   2 -11  -2    2.77    0.28
  -2 -11   2    2.99    0.37
  -2 -11   2    3.12    0.38
   2 -11  -2    2.96    0.37
   2 -11  -2    3.54    0.44
   2  11  -2    2.96    0.42
  -2  11   2    2.36    0.35
   2  11  -2    2.65    0.25
  -2  11   2    3.05    0.36
  -2  11   2    2.98    0.43
   2  11  -2    2.60    0.27
  -1 -11   2    3.27    0.43
  -1 -11   2    3.26    0.37
   1 -11  -2    3.81    0.31
  -1 -11   2    3.26    0.38
   1 -11  -2    3.60    0.37
   1 -11  -2    3.81    0.45
  -1  11   2    3.43    0.37
   1  11  -2    3.23    0.36
  -1  11   2    3.33    0.44
   1  11  -2    3.49    0.43
  -1  11   2    3.35    0.30
   0 -11  -2    9.15    0.50
   0 -11   2    8.64    0.41
   0 -11   2    8.72    0.49
   0 -11  -2    9.06    0.40
   0 -11  -2    9.04    0.43
   0 -11   2    8.75    0.44
   0  11  -2    8.78    0.42
   0  11   2    8.81    0.50
   0  11  -2    7.56    0.34
   0  11  -2    9.24    0.50
   0  11   2    8.89    0.32
   0  11   2    8.61    0.42
   1 -11   2    7.53    0.48
   1 -11   2    7.26    0.42
   1 -11   2    6.63    0.37
  -1 -11  -2    6.82    0.40
  -1 -11  -2    5.61    0.45
  -1 -11  -2    6.75    0.39
  -1  11  -2    7.17    0.40
   1  11   2    7.10    0.40
  -1  11  -2    6.82    0.48
   1  11   2    6.88    0.48
   1  11   2    6.47    0.26
   2 -11   2    2.87    0.32
  -2 -11  -2    3.74    0.37
   2 -11   2    3.79    0.45
   2 -11   2    3.80    0.38
  -2 -11  -2    2.86    0.43
  -2 -11  -2    3.27    0.37
   2  11   2    3.30    0.37
   2  11   2    3.86    0.45
  -2  11  -2    3.29    0.37
  -2  11  -2    3.28    0.44
  -2  11  -2    3.64    0.42
   2  11   2    3.32    0.38
   3 -11   2   16.81    0.62
  -3 -11  -2   16.85    0.58
   3 -11   2   15.66    0.49
   3 -11   2   16.27    0.57
  -3 -11  -2   15.58    0.59
  -3 -11  -2   16.01    0.55
  -3  11  -2   17.12    0.62
   3  11   2   16.15    0.53
  -3  11  -2   16.05    0.55
  -3  11  -2   16.58    0.61
  -3  11  -2   17.26    0.52
   3  11   2   15.97    0.56
   3  11   2   16.36    0.60
   4 -11   2    2.98    0.45
   4 -11   2    2.39    0.31
  -4 -11  -2    3.18    0.46
  -4 -11  -2    2.73    0.31
   4 -11   2    2.66    0.31
  -4 -11  -2    2.16    0.32
   4  11   2    2.82    0.36
  -4  11  -2    2.61    0.32
  -4  11  -2    2.52    0.38
   4  11   2    2.64    0.31
  -4  11  -2    2.95    0.48
   5 -11   2    1.44    0.24
  -5 -11  -2    1.31    0.30
   5 -11   2    1.78    0.33
   5 -11   2    1.40    0.30
  -5  11  -2    1.45    0.24
   5  11   2    1.26    0.25
  -5  11  -2    1.36    0.35
  -5  11  -2    1.52    0.29
   5  11   2    1.52    0.33
  -5  11  -2    1.12    0.32
   5  11   2    1.14    0.25
   6 -11   2    5.40    0.48
   6 -11   2    4.34    0.45
  -6 -11  -2    4.26    0.49
   6 -11   2    5.11    0.35
  -6 -11  -2    4.55    0.41
  -6 -11  -2    5.06    0.50
   6  11   2    4.81    0.46
  -6  11  -2    4.15    0.62
   6  11   2    5.06    0.40
  -6  11  -2    4.82    0.51
   6  11   2    4.57    0.47
  -6  11  -2    5.12    0.45
  -6  11  -2    4.96    0.44
  -7 -11  -2    5.15    0.43
   7 -11   2    5.83    0.51
   7 -11   2    5.04    0.37
  -7 -11  -2    6.13    0.53
   7 -11   2    5.05    0.49
   7  11   2    5.25    0.40
  -7  11  -2    5.48    0.36
  -7  11  -2    4.84    0.58
   7  11   2    4.71    0.49
  -7  11  -2    4.57    0.47
  -7  11  -2    5.12    0.54
   7  11   2    5.44    0.43
  -8 -11  -2   -0.42    0.27
   8 -11   2    0.02    0.33
   8 -11   2   -0.37    0.34
   8  11   2    0.69    0.33
   8  11   2    0.36    0.31
  -8  11  -2   -0.52    0.23
  -8  11  -2   -0.02    0.38
  -8  11  -2   -0.03    0.35
  -8  11  -2   -0.06    0.34
  -9 -11  -2    0.67    0.40
   9 -11   2    0.10    0.35
  -9 -11  -2    0.52    0.31
   9 -11   2    0.25    0.36
   9  11   2    0.28    0.31
   9  11   2    0.17    0.35
  -9  11  -2    0.26    0.36
  -9  11  -2    0.45    0.38
  -9  11  -2    0.14    0.27
  -9  11  -2    0.66    0.40
 -10 -11  -2    1.45    0.44
  10 -11   2    1.46    0.41
 -10 -11  -2    2.13    0.35
  10 -11   2    2.10    0.41
 -10  11  -2    1.60    0.42
  10  11   2    1.78    0.43
 -10  11  -2    1.13    0.40
  11 -11   2    1.99    0.41
  11 -11   2    1.00    0.45
 -11 -11  -2    2.41    0.34
 -11 -11  -2    1.55    0.49
 -11  11  -2    2.12    0.52
 -11  11  -2    1.92    0.31
 -11  11  -2    1.71    0.49
  11  11   2    1.71    0.56
 -12 -11  -2   -0.24    0.38
 -12 -11  -2   -0.24    0.84
  12  11   2    1.04    0.53
 -12  11  -2    0.98    0.54
 -12  11  -2   -0.05    0.59
 -11 -12   2    0.09    0.49
 -11 -12   2    0.46    0.35
 -11 -12   2    0.01    0.47
 -11  12   2   -0.41    0.67
 -11  12   2    0.58    0.40
  10 -12  -2    1.95    0.36
 -10 -12   2    2.21    0.47
 -10 -12   2    1.90    0.48
 -10 -12   2    2.69    0.36
  10 -12  -2    1.98    0.42
  10  12  -2    1.88    0.52
 -10  12   2    1.51    0.45
 -10  12   2    0.93    0.51
   9 -12  -2    2.57    0.37
  -9 -12   2    2.59    0.45
  -9 -12   2    2.66    0.49
   9 -12  -2    3.04    0.43
  -9 -12   2    2.63    0.37
  -9  12   2    3.08    0.50
  -9  12   2    2.22    0.43
  -9  12   2    2.37    0.38
  -9  12   2    2.87    0.56
   9  12  -2    2.40    0.37
  -8 -12   2    5.05    0.55
   8 -12  -2    6.19    0.52
  -8 -12   2    6.77    0.51
  -8 -12   2    5.86    0.59
   8 -12  -2    6.59    0.55
   8  12  -2    6.22    0.48
  -8  12   2    6.37    0.68
  -8  12   2    5.23    0.53
  -8  12   2    5.26    0.58
  -7 -12   2    5.21    0.53
  -7 -12   2    4.30    0.53
   7 -12  -2    4.21    0.47
   7 -12  -2    5.51    0.51
   7  12  -2    5.07    0.44
   7  12  -2    4.67    0.42
  -7  12   2    5.61    0.93
  -7  12   2    4.25    0.47
  -7  12   2    4.59    0.56
  -7  12   2    4.62    0.60
  -6 -12   2    9.59    0.58
  -6 -12   2    8.35    0.55
  -6 -12   2    9.77    0.50
   6 -12  -2    8.76    0.61
   6 -12  -2    8.57    0.50
   6  12  -2    8.94    0.42
   6  12  -2    9.70    0.51
  -6  12   2    9.53    0.62
  -6  12   2    9.25    0.63
  -6  12   2    8.93    0.59
  -6  12   2    8.67    0.50
   5 -12  -2   -0.04    0.27
  -5 -12   2   -0.20    0.29
  -5 -12   2   -0.45    0.30
   5 -12  -2    0.40    0.18
   5 -12  -2   -0.14    0.27
  -5 -12   2   -0.33    0.27
  -5  12   2   -0.46    0.31
   5  12  -2   -0.13    0.24
   5  12  -2   -0.13    0.20
  -5  12   2   -0.32    0.27
   5  12  -2    0.00    0.30
  -5  12   2   -0.29    0.35
   4 -12  -2    3.11    0.43
  -4 -12   2    2.02    0.31
  -4 -12   2    1.89    0.34
  -4 -12   2    1.74    0.35
   4 -12  -2    2.27    0.27
   4 -12  -2    2.21    0.34
   4  12  -2    2.18    0.35
   4  12  -2    1.90    0.29
  -4  12   2    1.67    0.29
   4  12  -2    2.29    0.27
  -4  12   2    2.05    0.37
  -4  12   2    1.88    0.34
  -3 -12   2    2.14    0.35
   3 -12  -2    2.77    0.32
   3 -12  -2    2.06    0.37
  -3 -12   2    1.99    0.32
  -3 -12   2    2.15    0.36
   3 -12  -2    2.04    0.22
   3  12  -2    1.72    0.34
   3  12  -2    2.27    0.27
   3  12  -2    1.96    0.28
  -3  12   2    2.34    0.34
  -3  12   2    1.93    0.29
  -2 -12   2   47.88    1.15
  -2 -12   2   48.98    1.10
   2 -12  -2   50.94    1.16
   2 -12  -2   50.38    1.02
   2 -12  -2   49.99    1.14
  -2 -12   2   44.03    1.34
   2  12  -2   50.58    1.02
   2  12  -2   50.58    1.08
  -2  12   2   48.73    1.17
   2  12  -2   50.05    1.13
  -2  12   2   48.76    1.07
   1 -12  -2    4.16    0.53
   1 -12  -2    3.41    0.46
   1 -12  -2    4.43    0.34
  -1 -12   2    3.72    0.40
  -1 -12   2    3.91    0.47
   1  12  -2    4.03    0.48
  -1  12   2    4.21    0.32
   1  12  -2    3.76    0.37
   0 -12   2    0.36    0.35
   0 -12  -2    0.33    0.25
   0 -12   2    0.06    0.26
   0 -12  -2   -0.45    0.37
   0  12   2   -0.10    0.22
   0  12  -2    0.31    0.26
   0  12  -2    0.63    0.32
   0  12   2   -0.43    0.41
  -1 -12  -2    5.83    0.41
  -1 -12  -2    3.52    0.53
   1 -12   2    4.93    0.67
   1 -12   2    4.81    0.38
  -1  12  -2    5.82    0.41
  -1  12  -2    4.71    0.63
   1  12   2    4.88    0.50
  -1  12  -2    4.34    0.37
   1  12   2    5.30    0.41
   2 -12   2    7.30    0.52
  -2 -12  -2    7.33    0.53
   2 -12   2    8.97    0.54
  -2 -12  -2    7.63    0.45
   2 -12   2    7.29    0.40
  -2 -12  -2    8.15    0.45
  -2  12  -2    7.17    0.46
   2  12   2    8.19    0.45
   2  12   2    7.88    0.44
  -2  12  -2    7.69    0.51
   2  12   2    7.55    0.52
   3 -12   2    0.25    0.28
  -3 -12  -2    0.09    0.32
   3 -12   2    0.43    0.24
   3 -12   2    0.35    0.33
  -3 -12  -2    0.51    0.28
  -3 -12  -2    0.35    0.27
  -3  12  -2    0.65    0.34
   3  12   2    0.51    0.24
   3  12   2    0.51    0.27
   3  12   2    0.67    0.33
  -3  12  -2    0.38    0.26
  -3  12  -2    0.85    0.32
  -4 -12  -2    0.03    0.34
   4 -12   2    0.31    0.29
   4 -12   2    0.01    0.22
  -4 -12  -2   -0.10    0.27
   4 -12   2    0.24    0.34
  -4  12  -2   -0.10    0.29
  -4  12  -2    0.23    0.33
   4  12   2   -0.06    0.28
  -4  12  -2   -0.07    0.31
   4  12   2    0.10    0.32
   4  12   2    0.03    0.25
   5 -12   2    1.19    0.37
   5 -12   2    0.55    0.31
   5 -12   2    0.68    0.24
  -5 -12  -2    0.54    0.30
  -5 -12  -2    0.37    0.33
  -5 -12  -2    0.09    0.33
  -5  12  -2    0.50    0.43
  -5  12  -2    0.44    0.31
   5  12   2    0.71    0.37
  -5  12  -2    0.61    0.34
   5  12   2    0.16    0.26
  -6 -12  -2    1.16    0.35
  -6 -12  -2    1.48    0.31
  -6 -12  -2    0.78    0.36
   6 -12   2    1.21    0.35
   6 -12   2    0.93    0.33
   6 -12   2    1.18    0.26
   6  12   2    1.16    0.36
  -6  12  -2    0.95    0.35
   6  12   2    0.93    0.29
  -6  12  -2    0.79    0.36
   6  12   2    1.30    0.27
  -6  12  -2    1.18    0.34
  -6  12  -2    0.69    0.38
  -7 -12  -2    1.03    0.40
   7 -12   2    0.58    0.36
   7 -12   2    0.72    0.34
  -7 -12  -2    0.50    0.38
   7 -12   2    0.86    0.26
  -7 -12  -2    0.93    0.31
   7  12   2    0.10    0.36
  -7  12  -2    0.32    0.35
   7  12   2    0.60    0.31
  -7  12  -2   -0.06    0.34
  -7  12  -2    0.78    0.34
   7  12   2    0.57    0.29
  -7  12  -2    0.66    0.41
  -8 -12  -2    0.91    0.43
  -8 -12  -2    0.70    0.39
  -8 -12  -2    0.98    0.32
   8 -12   2    0.84    0.36
   8 -12   2    1.18    0.39
  -8  12  -2    1.00    0.41
  -8  12  -2    1.30    0.49
  -8  12  -2    0.43    0.37
   8  12   2    0.27    0.39
  -8  12  -2    1.40    0.44
   8  12   2    0.62    0.37
   8  12   2    1.37    0.31
   9 -12   2    2.65    0.45
  -9 -12  -2    3.31    0.54
   9 -12   2    2.83    0.42
  -9 -12  -2    2.18    0.46
  -9 -12  -2    3.30    0.49
   9  12   2    2.26    0.44
  -9  12  -2    1.60    0.53
  -9  12  -2    2.57    0.47
   9  12   2    2.75    0.37
  -9  12  -2    3.09    0.51
 -10 -12  -2    2.14    0.36
  10 -12   2    1.55    0.45
 -10 -12  -2    1.37    0.48
 -10 -12  -2    0.30    0.50
  10 -12   2    1.37    0.48
  10  12   2    0.59    0.48
 -10  12  -2    1.16    0.36
 -10  12  -2    1.19    0.48
 -10  12  -2    1.06    0.52
 -11 -12  -2    0.25    0.52
  11 -12   2    0.48    0.73
 -11 -12  -2    0.47    0.37
  11 -12   2   -1.04    0.70
 -11  12  -2   -0.02    0.59
 -11  12  -2    0.80    0.53
  10 -13  -2    1.16    0.40
 -10 -13   2   -0.61    0.46
 -10 -13   2    0.34    0.53
  10 -13  -2    0.42    0.55
 -10 -13   2    0.21    0.40
 -10  13   2   -1.15    0.64
   9 -13  -2    4.39    0.64
  -9 -13   2    3.81    0.52
  -9 -13   2    4.01    0.51
  -9 -13   2    3.60    0.42
   9 -13  -2    4.97    0.56
   9  13  -2    3.56    0.55
  -9  13   2    3.29    0.57
  -9  13   2    3.15    0.51
  -8 -13   2    0.95    0.36
  -8 -13   2    0.00    0.43
   8 -13  -2   -0.15    0.59
   8 -13  -2    0.57    0.38
  -8 -13   2    0.53    0.43
  -8  13   2    0.86    0.48
   8  13  -2    0.99    0.34
  -8  13   2    0.26    0.48
  -8  13   2    0.99    0.43
  -8  13   2    0.12    0.44
   7 -13  -2    3.83    0.56
   7 -13  -2    2.89    0.39
  -7 -13   2    3.19    0.48
  -7 -13   2    3.69    0.56
  -7 -13   2    3.92    0.55
  -7  13   2    3.02    0.45
  -7  13   2    3.54    0.50
  -7  13   2    2.84    0.40
   7  13  -2    3.86    0.47
   7  13  -2    3.63    0.46
  -6 -13   2    0.62    0.35
  -6 -13   2    0.38    0.31
  -6 -13   2    0.07    0.39
   6 -13  -2    0.61    0.36
   6 -13  -2   -0.19    0.32
  -6  13   2   -0.21    0.32
  -6  13   2    0.06    0.38
   6  13  -2   -0.06    0.26
   6  13  -2    0.49    0.26
   6  13  -2   -0.10    0.34
  -6  13   2    0.74    0.37
  -6  13   2    0.26    0.37
   5 -13  -2    0.31    0.36
  -5 -13   2    0.17    0.31
  -5 -13   2    0.18    0.32
   5 -13  -2    0.47    0.20
   5 -13  -2    0.44    0.30
  -5 -13   2    0.23    0.39
   5  13  -2    0.19    0.23
  -5  13   2    0.29    0.39
   5  13  -2    0.53    0.35
  -5  13   2    0.41    0.32
   5  13  -2    0.32    0.28
  -5  13   2    0.39    0.37
  -4 -13   2    2.98    0.41
   4 -13  -2    3.16    0.36
  -4 -13   2    3.30    0.47
  -4 -13   2    2.85    0.35
   4 -13  -2    3.02    0.31
  -4  13   2    2.71    0.46
   4  13  -2    3.46    0.39
   4  13  -2    2.77    0.33
   4  13  -2    3.08    0.45
  -4  13   2    3.40    0.41
  -4  13   2    3.34    0.43
  -3 -13   2    2.22    0.34
   3 -13  -2    2.06    0.31
   3 -13  -2    2.20    0.33
  -3 -13   2    2.02    0.39
  -3 -13   2    2.46    0.38
   3 -13  -2    2.44    0.34
  -3  13   2    2.04    0.40
  -3  13   2    2.43    0.32
   3  13  -2    2.36    0.30
   3  13  -2    2.80    0.39
   3  13  -2    2.04    0.31
  -2 -13   2    2.54    0.40
   2 -13  -2    2.88    0.36
   2 -13  -2    2.29    0.33
  -2 -13   2    3.06    0.44
   2 -13  -2    3.64    0.45
  -2  13   2    2.29    0.37
  -2  13   2    2.65    0.38
   2  13  -2    2.98    0.31
   1 -13  -2    2.71    0.36
   1 -13  -2    3.69    0.43
   1 -13  -2    2.38    0.35
  -1 -13   2    2.92    0.39
  -1 -13   2    2.97    0.41
  -1 -13   2    3.14    0.44
   1  13  -2    3.32    0.49
  -1  13   2    2.59    0.39
  -1  13   2    2.89    0.32
   1  13  -2    2.89    0.31
   0 -13   2    2.78    0.40
   0 -13  -2    3.09    0.39
   0 -13  -2    3.20    0.43
   0 -13   2    2.92    0.45
   0  13   2    2.82    0.41
   0  13   2    2.75    0.26
   0  13  -2    2.32    0.29
   0  13   2    2.93    0.40
   0  13  -2    3.31    0.39
   0  13  -2    3.21    0.41
  -1 -13  -2    2.45    0.33
  -1 -13  -2    2.20    0.33
   1 -13   2    2.70    0.35
   1 -13   2    2.19    0.30
   1  13   2    2.17    0.36
  -1  13  -2    2.50    0.33
  -1  13  -2    2.35    0.37
   1  13   2    1.95    0.31
  -1  13  -2    2.17    0.26
   1  13   2    2.34    0.40
  -2 -13  -2    0.71    0.29
   2 -13   2    0.89    0.26
  -2 -13  -2    0.81    0.28
   2 -13   2    0.49    0.33
   2  13   2    0.30    0.29
   2  13   2    0.45    0.38
  -2  13  -2    0.18    0.30
  -2  13  -2    1.05    0.37
   2  13   2    0.71    0.25
  -3 -13  -2   -0.06    0.34
   3 -13   2   -0.13    0.25
   3 -13   2   -0.19    0.30
  -3 -13  -2    0.05    0.27
   3  13   2   -0.34    0.37
  -3  13  -2    0.22    0.30
   3  13   2    0.06    0.30
  -3  13  -2   -0.39    0.34
  -3  13  -2   -0.19    0.34
   3  13   2    0.10    0.24
  -4 -13  -2    5.93    0.49
  -4 -13  -2    5.30    0.48
   4 -13   2    5.81    0.50
  -4 -13  -2    5.09    0.56
   4 -13   2    5.59    0.40
  -4  13  -2    5.45    0.53
   4  13   2    5.78    0.46
   4  13   2    4.49    0.53
   4  13   2    5.55    0.42
  -4  13  -2    5.35    0.53
  -4  13  -2    5.67    0.59
  -4  13  -2    5.05    0.64
   5 -13   2    1.32    0.26
   5 -13   2    1.70    0.37
  -5 -13  -2    1.44    0.34
  -5 -13  -2    1.28    0.41
  -5 -13  -2    1.14    0.40
   5  13   2    1.51    0.45
  -5  13  -2    0.87    0.42
  -5  13  -2    1.33    0.41
   5  13   2    1.03    0.29
  -5  13  -2    1.14    0.36
  -5  13  -2    0.34    0.32
   5  13   2    1.44    0.34
  -6 -13  -2    2.62    0.39
  -6 -13  -2    2.84    0.36
   6 -13   2    2.68    0.39
  -6 -13  -2    2.49    0.47
   6 -13   2    2.88    0.40
  -6  13  -2    2.10    0.38
   6  13   2    3.00    0.58
   6  13   2    3.13    0.44
  -6  13  -2    3.00    0.45
  -6  13  -2    2.96    0.40
   6  13   2    3.11    0.44
  -6  13  -2    2.54    0.39
  -7 -13  -2    0.37    0.34
   7 -13   2    1.01    0.45
   7 -13   2    0.81    0.29
   7 -13   2    0.83    0.39
  -7 -13  -2    1.31    0.48
  -7 -13  -2    0.69    0.40
   7  13   2    0.32    0.34
   7  13   2    1.47    0.32
  -7  13  -2    1.00    0.37
  -7  13  -2    0.55    0.44
   7  13   2    1.40    0.42
  -7  13  -2    0.90    0.27
   8 -13   2   -0.38    0.46
  -8 -13  -2    0.64    0.36
   8 -13   2    0.42    0.40
  -8 -13  -2   -0.45    0.43
  -8 -13  -2   -0.07    0.44
  -8  13  -2    0.55    0.29
   8  13   2    0.58    0.34
   8  13   2   -0.32    0.37
   8  13   2    0.88    0.39
  -8  13  -2    0.77    0.47
  -8  13  -2    0.66    0.43
  -9 -13  -2    3.85    0.51
   9 -13   2    1.61    0.56
   9 -13   2    2.50    0.46
  -9 -13  -2    3.48    0.54
  -9  13  -2    3.39    0.44
   9  13   2    4.44    0.55
   9  13   2    3.02    0.40
  -9  13  -2    4.75    0.76
  -9  13  -2    3.75    0.53
   9  13   2    3.09    0.44
  10 -13   2    0.09    0.44
 -10 -13  -2    1.64    0.49
 -10 -13  -2    0.30    0.41
 -10  13  -2   -0.34    0.51
  10  13   2    0.09    0.52
 -10  13  -2    0.78    0.57
   9 -14  -2    3.13    0.44
  -9 -14   2    2.93    0.41
  -9 -14   2    2.12    0.52
  -9  14   2    1.52    0.62
  -9  14   2    2.03    0.52
  -8 -14   2    1.65    0.43
   8 -14  -2    1.06    0.41
  -8 -14   2    1.47    0.42
  -8 -14   2    1.57    0.57
  -8  14   2    1.96    0.48
  -8  14   2    1.68    0.57
  -8  14   2    1.43    0.48
   8  14  -2    1.61    0.36
   8  14  -2    1.52    0.39
   7 -14  -2    0.75    0.39
  -7 -14   2    0.82    0.45
  -7 -14   2    1.89    0.45
  -7 -14   2    1.07    0.38
  -7  14   2    1.44    0.48
  -7  14   2    1.13    0.50
   7  14  -2    1.27    0.38
  -7  14   2    1.72    0.47
   7  14  -2    0.79    0.35
   7  14  -2    1.59    0.36
   6 -14  -2    1.34    0.48
   6 -14  -2    1.26    0.35
  -6 -14   2    0.67    0.35
  -6 -14   2    1.80    0.51
  -6 -14   2    1.33    0.40
   6  14  -2    1.16    0.32
   6  14  -2    1.23    0.31
  -6  14   2    0.45    0.43
  -6  14   2    1.18    0.48
   6  14  -2    1.01    0.42
  -6  14   2    1.08    0.47
  -5 -14   2    0.00    0.43
   5 -14  -2    0.00    0.35
   5 -14  -2   -0.20    0.44
  -5 -14   2    0.37    0.33
   5 -14  -2    0.30    0.22
  -5 -14   2   -0.13    0.37
   5  14  -2   -0.07    0.42
  -5  14   2    0.39    0.40
   5  14  -2    0.16    0.30
  -5  14   2   -0.58    0.36
   5  14  -2    0.34    0.26
  -5  14   2    0.06    0.34
   4 -14  -2    0.19    0.44
  -4 -14   2    0.70    0.38
   4 -14  -2    1.01    0.35
   4 -14  -2    0.69    0.23
  -4 -14   2    0.67    0.44
  -4 -14   2    0.99    0.34
   4  14  -2    0.30    0.30
  -4  14   2    0.98    0.44
   4  14  -2    0.74    0.26
  -4  14   2    0.79    0.34
   4  14  -2    0.73    0.40
  -4  14   2    0.69    0.36
  -3 -14   2   10.89    0.58
   3 -14  -2   10.34    0.43
  -3 -14   2   10.61    0.59
  -3 -14   2    9.89    0.68
   3 -14  -2   10.92    0.58
   3  14  -2   11.50    0.63
   3  14  -2   11.27    0.45
  -3  14   2   10.68    0.57
  -3  14   2   11.39    0.64
   3  14  -2   10.46    0.53
   2 -14  -2   36.39    0.94
  -2 -14   2   35.57    0.93
  -2 -14   2   34.87    1.03
   2 -14  -2   34.67    0.82
  -2 -14   2   36.22    0.94
   2  14  -2   34.23    0.83
  -2  14   2   33.91    0.90
   2  14  -2   35.49    0.97
  -2  14   2   36.07    1.01
  -1 -14   2    2.97    0.44
   1 -14  -2    2.88    0.39
  -1 -14   2    3.71    0.49
   1 -14  -2    3.36    0.48
  -1 -14   2    2.51    0.43
   1  14  -2    2.79    0.42
  -1  14   2    2.97    0.35
  -1  14   2    2.21    0.44
   0 -14   2    0.09    0.32
   0 -14  -2    0.70    0.33
   0 -14   2    0.13    0.42
   0 -14  -2    0.30    0.28
   0  14  -2    0.33    0.37
   0  14  -2   -0.33    0.20
   0  14   2    0.20    0.27
   0  14   2    0.37    0.19
   0  14   2   -0.05    0.39
  -1 -14  -2   -0.28    0.31
  -1 -14  -2   -0.13    0.31
   1 -14   2    0.42    0.34
   1 -14   2    0.11    0.31
   1  14   2    0.11    0.38
  -1  14  -2    0.40    0.30
  -1  14  -2   -0.24    0.25
   1  14   2    0.79    0.27
  -1  14  -2   -0.07    0.38
   2 -14   2   -0.05    0.27
   2 -14   2   -0.13    0.36
  -2 -14  -2    0.08    0.30
  -2 -14  -2    0.52    0.35
   2  14   2   -0.32    0.28
   2  14   2    0.06    0.38
  -2  14  -2    0.28    0.36
  -2  14  -2   -0.02    0.37
  -2  14  -2   -0.09    0.29
  -2  14  -2   -0.10    0.24
  -3 -14  -2    7.23    0.53
  -3 -14  -2    7.58    0.54
   3 -14   2    7.32    0.55
  -3 -14  -2    6.79    0.67
   3 -14   2    6.87    0.43
   3  14   2    7.04    0.45
  -3  14  -2    7.50    0.62
  -3  14  -2    7.87    0.60
   3  14   2    6.90    0.61
   4 -14   2    2.98    0.32
   4 -14   2    3.43    0.40
   4 -14   2    2.15    0.47
  -4 -14  -2    3.00    0.46
  -4 -14  -2    2.72    0.40
  -4 -14  -2    2.98    0.39
  -4  14  -2    2.80    0.44
  -4  14  -2    2.60    0.45
   4  14   2    2.77    0.43
  -4  14  -2    3.01    0.42
   4  14   2    3.10    0.47
   5 -14   2    0.29    0.27
  -5 -14  -2    0.35    0.39
   5 -14   2    0.32    0.55
  -5 -14  -2   -0.20    0.44
  -5 -14  -2   -0.01    0.33
   5 -14   2   -0.05    0.38
  -5  14  -2    0.58    0.39
   5  14   2    0.04    0.30
  -5  14  -2    0.09    0.45
  -5  14  -2   -0.40    0.35
  -5  14  -2    0.28    0.42
   5  14   2   -0.07    0.40
  -6 -14  -2    1.71    0.45
  -6 -14  -2    2.53    0.39
   6 -14   2    2.31    0.43
  -6 -14  -2    3.99    0.56
   6 -14   2    3.33    0.41
   6 -14   2    2.93    0.51
  -6  14  -2    2.98    0.43
  -6  14  -2    2.40    0.49
  -6  14  -2    4.19    0.61
   6  14   2    2.17    0.46
  -6  14  -2    3.34    0.59
   6  14   2    2.65    0.35
  -7 -14  -2    0.18    0.48
   7 -14   2    0.09    0.30
  -7 -14  -2   -0.15    0.38
   7 -14   2   -0.13    0.42
   7 -14   2   -0.49    0.50
   7  14   2    0.19    0.42
  -7  14  -2    0.92    0.54
  -7  14  -2    0.89    0.41
  -7  14  -2    0.67    0.41
  -7  14  -2    0.14    0.48
   7  14   2    0.68    0.36
   7  14   2    0.56    0.37
   8 -14   2    0.06    0.45
  -8 -14  -2    0.85    0.51
  -8 -14  -2    1.09    0.42
   8 -14   2    0.57    0.51
   8  14   2    0.68    0.40
  -8  14  -2    1.46    0.57
  -8  14  -2    0.88    0.55
   8  14   2    0.44    0.39
  -8  14  -2    0.17    0.52
   9 -14   2    0.56    0.56
  -9 -14  -2    1.43    0.48
   9 -14   2    0.28    0.48
  -9  14  -2    1.50    0.56
   9  14   2    1.80    0.46
   9  14   2    2.08    0.51
  -9  14  -2    1.51    0.54
  -8 -15   2   -0.02    0.52
  -8 -15   2    0.85    0.46
   8 -15  -2   -0.07    0.46
   8 -15  -2    0.12    0.60
  -8  15   2    0.38    0.56
   8  15  -2    1.27    0.42
  -8  15   2    0.60    0.62
  -7 -15   2    2.05    0.45
   7 -15  -2    1.67    0.54
  -7 -15   2    2.65    0.48
   7 -15  -2    1.47    0.43
  -7  15   2    1.72    0.56
  -7  15   2    2.05    0.60
   7  15  -2    1.15    0.41
  -7  15   2    2.25    0.58
   7  15  -2    2.31    0.44
  -6 -15   2    1.71    0.39
   6 -15  -2    0.49    0.41
  -6 -15   2    1.38    0.45
   6 -15  -2    0.96    0.55
  -6  15   2    1.57    0.49
   6  15  -2    1.53    0.36
  -6  15   2    0.81    0.53
   6  15  -2    0.86    0.34
   6  15  -2    1.00    0.55
   5 -15  -2    1.31    0.47
   5 -15  -2    0.97    0.24
  -5 -15   2    1.03    0.38
   5 -15  -2    0.98    0.41
  -5 -15   2    0.84    0.43
  -5  15   2    1.18    0.40
  -5  15   2    0.56    0.50
   5  15  -2    2.22    0.42
   5  15  -2    1.22    0.45
   5  15  -2    0.60    0.29
   4 -15  -2    4.54    0.57
  -4 -15   2    4.97    0.59
   4 -15  -2    5.55    0.68
  -4 -15   2    4.13    0.59
   4 -15  -2    4.76    0.38
  -4 -15   2    4.98    0.51
  -4  15   2    6.17    0.66
  -4  15   2    5.13    0.56
   4  15  -2    4.13    0.62
   4  15  -2    4.36    0.42
   3 -15  -2    7.10    0.56
  -3 -15   2    6.15    0.69
  -3 -15   2    6.80    0.58
  -3 -15   2    6.18    0.56
   3 -15  -2    5.46    0.40
   3 -15  -2    5.38    0.67
   3  15  -2    6.14    0.61
  -3  15   2    5.59    0.50
  -3  15   2    6.15    0.67
   2 -15  -2    7.31    0.57
  -2 -15   2    6.12    0.54
   2 -15  -2    6.54    0.66
  -2 -15   2    6.14    0.57
  -2 -15   2    4.82    0.52
   2 -15  -2    5.60    0.42
  -2  15   2    5.19    0.60
   2  15  -2    5.22    0.40
  -2  15   2    6.18    0.65
   2  15  -2    6.79    0.59
  -1 -15   2    0.41    0.35
  -1 -15   2    0.32    0.50
   1 -15  -2    0.26    0.28
  -1 -15   2    0.13    0.33
   1 -15  -2    0.37    0.37
   1 -15  -2    0.10    0.46
   1  15  -2   -0.29    0.39
  -1  15   2    0.45    0.41
  -1  15   2   -0.52    0.27
   1  15  -2    0.79    0.51
   1  15  -2   -0.09    0.31
  -1  15   2    0.20    0.25
   0 -15  -2    0.28    0.30
   0 -15   2   -0.72    0.40
   0 -15   2    0.11    0.35
   0 -15  -2    0.01    0.34
   0 -15  -2   -0.29    0.36
   0 -15   2   -0.23    0.32
   0  15   2   -0.24    0.37
   0  15   2   -0.24    0.19
   0  15  -2   -0.10    0.40
   0  15  -2   -0.15    0.34
   0  15   2    0.32    0.40
   1 -15   2    0.02    0.29
  -1 -15  -2   -0.35    0.37
  -1 -15  -2    0.54    0.33
   1 -15   2    0.73    0.39
   1 -15   2   -0.26    0.40
  -1 -15  -2   -0.18    0.36
   1  15   2    0.14    0.29
   1  15   2    0.86    0.41
   1  15   2    0.99    0.36
  -1  15  -2    0.01    0.33
  -1  15  -2    0.16    0.27
  -1  15  -2    0.59    0.40
   2 -15   2   -0.02    0.47
  -2 -15  -2    0.05    0.34
   2 -15   2   -0.23    0.46
  -2 -15  -2    0.04    0.33
  -2 -15  -2    0.53    0.45
   2 -15   2   -0.56    0.39
   2  15   2    0.24    0.42
   2  15   2    0.04    0.41
   2  15   2   -0.11    0.28
  -2  15  -2   -0.77    0.33
  -2  15  -2   -0.03    0.42
  -2  15  -2    0.12    0.42
  -2  15  -2   -0.10    0.34
   3 -15   2    1.93    0.51
  -3 -15  -2    2.46    0.40
   3 -15   2    2.17    0.42
  -3 -15  -2    2.21    0.40
   3 -15   2    2.71    0.34
  -3 -15  -2    2.05    0.69
  -3  15  -2    2.97    0.47
   3  15   2    2.90    0.46
   3  15   2    2.45    0.40
  -3  15  -2    2.95    0.38
  -3  15  -2    3.27    0.48
   3  15   2    2.42    0.45
   4 -15   2   -0.06    0.50
   4 -15   2    0.54    0.37
  -4 -15  -2    0.81    0.36
  -4 -15  -2    0.83    0.38
   4 -15   2    0.50    0.30
  -4  15  -2    0.43    0.47
   4  15   2    0.20    0.34
  -4  15  -2   -0.29    0.49
  -4  15  -2    1.24    0.42
   4  15   2   -0.07    0.42
   4  15   2    0.36    0.40
   5 -15   2    4.62    0.45
  -5 -15  -2    4.21    0.59
  -5 -15  -2    4.78    0.58
   5 -15   2    4.84    0.61
   5 -15   2    3.93    0.75
   5  15   2    4.00    0.62
   5  15   2    4.14    0.53
   5  15   2    4.46    0.54
  -5  15  -2    4.59    0.64
  -5  15  -2    3.92    0.55
  -5  15  -2    6.02    0.65
  -6 -15  -2    0.23    0.37
   6 -15   2    0.67    0.31
   6 -15   2   -0.42    0.44
  -6 -15  -2    0.84    0.48
   6  15   2    0.00    0.45
   6  15   2    0.52    0.36
   6  15   2    0.23    0.41
  -6  15  -2    0.03    0.55
  -6  15  -2   -0.78    0.54
   7 -15   2    2.21    0.48
  -7 -15  -2    1.87    0.45
  -7 -15  -2    1.99    0.52
   7  15   2    1.70    0.43
   7  15   2    2.16    0.50
  -7  15  -2    2.12    0.54
   7  15   2    1.37    0.71
  -7  15  -2    2.58    0.66
   8 -15   2   -0.62    0.49
  -8 -15  -2    0.48    0.49
  -8 -15  -2    0.10    0.45
   8  15   2   -0.71    0.62
  -8  15  -2    0.75    0.62
   8  15   2    0.09    0.50
  -8  15  -2    0.63    0.58
  -7 -16   2    1.64    0.53
   7 -16  -2    0.96    0.47
  -7 -16   2    1.49    0.57
   7  16  -2    1.80    0.53
  -7  16   2    0.97    0.60
  -7  16   2    0.80    0.77
  -7  16   2    0.69    0.61
  -6 -16   2    3.18    0.60
  -6 -16   2    4.43    0.50
   6 -16  -2    3.04    0.50
   6  16  -2    3.58    0.51
  -6  16   2    5.11    0.85
  -6  16   2    3.53    0.64
  -6  16   2    3.27    0.60
   5 -16  -2    0.00    0.46
   5 -16  -2    0.93    0.27
  -5 -16   2    0.06    0.47
  -5 -16   2   -0.02    0.48
  -5  16   2    0.55    0.51
   5  16  -2    0.55    0.51
   5  16  -2    1.35    0.45
  -5  16   2    1.47    0.52
  -4 -16   2    7.97    0.68
   4 -16  -2    7.50    0.65
   4 -16  -2    7.98    0.45
  -4 -16   2    8.06    0.65
   4  16  -2    7.37    0.64
   4  16  -2    6.02    0.63
  -4  16   2    9.54    0.77
  -4  16   2    7.49    0.63
   4  16  -2    6.71    0.71
  -3 -16   2    1.19    0.43
   3 -16  -2    0.25    0.29
  -3 -16   2    0.17    0.38
   3 -16  -2    0.88    0.41
   3  16  -2    0.50    0.35
  -3  16   2    0.35    0.40
   3  16  -2   -0.06    0.50
  -3  16   2    0.43    0.49
   3  16  -2    0.15    0.48
  -2 -16   2    5.77    0.64
   2 -16  -2    7.48    0.63
   2 -16  -2    6.27    0.46
  -2 -16   2    6.19    0.57
   2  16  -2    6.27    0.71
  -2  16   2    6.80    0.72
   2  16  -2    5.74    0.48
  -2  16   2    6.71    0.48
   2  16  -2    6.35    0.61
   1 -16  -2    0.27    0.36
   1 -16  -2    0.54    0.42
  -1 -16   2   -0.04    0.37
  -1 -16   2    0.29    0.44
  -1  16   2    0.45    0.28
   1  16  -2    0.39    0.37
   1  16  -2    0.65    0.46
  -1  16   2    0.02    0.48
   1  16  -2    0.80    0.31
   0 -16   2    0.98    0.41
   0 -16  -2    0.85    0.34
   0 -16  -2    0.82    0.38
   0 -16   2    0.57    0.33
   0  16  -2    1.86    0.46
   1 -16   2    0.40    0.33
  -1 -16  -2    0.52    0.38
   1 -16   2    1.17    0.39
  -1 -16  -2    0.54    0.41
  -1  16  -2    1.34    0.54
  -1  16  -2    0.80    0.47
   1  16   2    0.94    0.27
   1  16   2    0.25    0.51
  -1  16  -2    0.82    0.29
  -2 -16  -2   -0.39    0.44
  -2 -16  -2   -0.40    0.36
   2 -16   2    0.09    0.44
   2 -16   2   -0.11    0.32
   2  16   2    0.61    0.50
  -2  16  -2   -0.09    0.49
  -2  16  -2    0.87    0.45
   2  16   2   -0.36    0.31
  -3 -16  -2    0.01    0.42
   3 -16   2    0.32    0.44
  -3 -16  -2   -0.37    0.42
   3 -16   2    0.31    0.33
  -3  16  -2   -0.52    0.53
   3  16   2   -0.20    0.52
   3  16   2    0.35    0.50
  -3  16  -2    0.16    0.39
   3  16   2   -0.08    0.38
  -3  16  -2    0.30    0.47
  -4 -16  -2    0.90    0.43
   4 -16   2    0.72    0.46
  -4 -16  -2    0.58    0.43
  -4  16  -2    1.64    0.52
   4  16   2    0.53    0.36
  -4  16  -2    1.15    0.47
   4  16   2    0.65    0.46
   4  16   2    0.99    0.50
  -4  16  -2    1.74    0.48
  -5 -16  -2    0.77    0.43
   5 -16   2    0.96    0.34
  -5 -16  -2    0.85    0.45
   5 -16   2    0.19    0.46
  -5  16  -2   -0.34    0.57
   5  16   2    0.56    0.37
   5  16   2    0.23    0.50
   5  16   2    0.52    0.51
  -5  16  -2    1.15    0.59
  -5  16  -2    0.64    0.54
   6 -16   2   -0.67    0.49
  -6 -16  -2    0.09    0.50
  -6 -16  -2    0.29    0.46
  -6  16  -2    0.34    0.60
  -6  16  -2   -1.33    0.62
  -6  16  -2    1.32    0.60
   6  16   2    0.17    0.51
   6  16   2    0.43    0.42
   6  16   2    0.82    0.47
   7 -16   2    2.99    0.49
  -7 -16  -2    1.56    0.56
  -7 -16  -2    2.08    0.52
   7 -16   2    1.79    0.54
   7  16   2    1.61    0.51
   7  16   2    1.88    0.56
  -7  16  -2    1.80    0.69
  -7  16  -2    3.92    0.79
   5 -17  -2    0.57    0.49
  -5 -17   2    0.48    0.52
  -5 -17   2    0.81    0.53
  -5  17   2    0.30    0.65
   5  17  -2    0.43    0.52
   5  17  -2    1.59    0.51
   4 -17  -2    1.12    0.32
  -4 -17   2    0.60    0.52
  -4 -17   2    0.59    0.49
   4 -17  -2   -0.19    0.48
  -4  17   2    0.60    0.50
  -4  17   2    0.62    0.57
   4  17  -2   -0.10    0.58
   4  17  -2    0.42    0.54
  -3 -17   2    3.72    0.54
   3 -17  -2    3.33    0.49
  -3 -17   2    4.67    0.52
   3 -17  -2    2.29    0.57
   3  17  -2    4.84    0.56
  -3  17   2    2.77    0.58
  -3  17   2    4.26    0.61
   2 -17  -2    1.67    0.50
  -2 -17   2    1.66    0.46
  -2 -17   2    1.74    0.51
  -2  17   2    0.98    0.60
   2  17  -2    0.41    0.53
   2  17  -2    1.60    0.36
   1 -17  -2    0.50    0.35
   1 -17  -2    1.20    0.47
  -1 -17   2    1.06    0.42
  -1 -17   2    1.49    0.46
   1  17  -2    1.63    0.32
  -1  17   2    1.79    0.54
   1  17  -2    0.07    0.57
   0 -17   2    1.37    0.51
   0 -17  -2    0.81    0.47
   0 -17  -2    1.13    0.37
   0 -17   2    0.56    0.42
   0  17  -2    0.24    0.62
   0  17   2    1.44    0.56
   0  17   2    0.85    0.43
  -1 -17  -2    0.65    0.41
   1 -17   2    0.39    0.36
  -1 -17  -2    2.25    0.51
   1  17   2    1.44    0.56
  -1  17  -2   -0.24    0.58
  -1  17  -2    1.21    0.49
  -2 -17  -2    0.96    0.47
   2 -17   2    0.97    0.37
   2 -17   2    0.92    0.47
  -2 -17  -2    1.05    0.43
  -2  17  -2    0.78    0.51
  -2  17  -2    1.77    0.57
   2  17   2    1.05    0.56
  -3 -17  -2    3.87    0.56
   3 -17   2    5.10    0.52
   3 -17   2    4.82    0.57
  -3 -17  -2    3.30    0.53
  -3  17  -2    5.20    0.81
  -3  17  -2    4.64    0.57
   3  17   2    6.82    0.82
   4 -17   2    4.38    0.54
  -4 -17  -2    5.68    0.71
  -4 -17  -2    4.67    0.70
   4 -17   2    4.07    0.61
  -4  17  -2    5.76    0.85
   4  17   2    5.30    0.81
  -4  17  -2    2.55    0.69
  -5 -17  -2    0.62    0.51
   5 -17   2    0.70    0.53
   5 -17   2    1.17    0.40
  -5 -17  -2    1.14    0.72
   5  17   2    1.91    0.58
  -5  17  -2    1.19    0.61
   1 -18  -2    0.21    0.41
  -1 -18   2    0.81    0.46
   1 -18  -2    0.27    0.55
  -1  18   2   -0.52    0.63
   1  18  -2    0.29    0.59
   0 -18  -2   -0.17    0.68
   0 -18  -2   -0.21    0.40
   0 -18   2    0.19    0.40
   0  18  -2    1.53    0.56
   0  18   2    0.19    0.63
   0  18   2   -0.40    0.49
   0  18  -2    0.04    0.57
   1 -18   2    1.10    0.41
  -1 -18  -2    0.82    0.42
 -15   0   3    2.41    0.37
 -14   0   3    0.49    0.37
 -14   0   3    0.44    0.43
 -13   0   3    0.84    0.36
 -13   0   3    0.96    0.40
 -12   0   3    0.00    0.38
 -12   0   3    0.00    0.33
 -11   0   3    0.57    0.29
 -11   0   3    0.24    0.31
 -10   0   3   -0.04    0.24
 -10   0   3    0.33    0.30
  -9   0   3    1.47    0.50
  -9   0   3    1.39    0.24
  -8   0   3   -0.04    0.20
  -8   0   3   -0.01    0.27
  -7   0   3   31.30    0.76
  -7   0   3   30.20    0.73
  -6   0   3   -0.10    0.17
  -6   0   3   -0.15    0.15
  -5   0   3    6.24    0.29
  -5   0   3    6.66    0.31
  -4   0   3    0.05    0.12
  -4   0   3   -0.19    0.11
  -3   0   3   12.12    0.28
  -3   0   3   11.11    0.34
   3   0  -3   11.34    0.35
   2   0  -3   -0.12    0.10
  -2   0   3    0.07    0.07
  -2   0   3   -0.12    0.08
   2   0  -3    0.07    0.07
  -1   0   3    2.22    0.12
   1   0  -3    2.40    0.09
  -1   0   3    2.30    0.10
   1   0  -3    2.04    0.12
   1   0  -3    2.25    0.10
  -1   0   3    2.09    0.09
  -1   0   3    2.17    0.10
   1   0  -3    1.89    0.09
   0   0  -3    0.07    0.07
   0   0   3   -0.06    0.06
   0   0   3   -0.09    0.06
   0   0   3   -0.01    0.05
   0   0  -3   -0.07    0.06
   0   0   3   -0.05    0.07
   0   0  -3   -0.01    0.05
   0   0  -3   -0.06    0.06
  -1   0  -3    3.97    0.14
   1   0   3    3.85    0.15
  -1   0  -3    4.05    0.14
   1   0   3    3.71    0.15
  -1   0  -3    4.05    0.15
   1   0   3    3.66    0.15
  -1   0  -3    3.86    0.15
   1   0   3    3.96    0.15
  -2   0  -3    0.02    0.10
  -2   0  -3   -0.10    0.10
  -2   0  -3   -0.07    0.10
   2   0   3    0.07    0.10
  -2   0  -3   -0.01    0.10
   2   0   3   -0.15    0.10
   2   0   3    0.06    0.11
  -3   0  -3    7.23    0.26
  -3   0  -3    7.46    0.24
   3   0   3    7.59    0.24
   3   0   3    7.24    0.26
  -3   0  -3    7.62    0.24
   3   0   3    7.77    0.24
  -4   0  -3   -0.05    0.11
   4   0   3    0.03    0.12
   4   0   3   -0.10    0.13
  -4   0  -3    0.03    0.12
  -4   0  -3   -0.04    0.11
   5   0   3   17.63    0.43
  -5   0  -3   18.23    0.48
   5   0   3   17.22    0.42
  -5   0  -3   17.87    0.43
  -5   0  -3   17.40    0.43
   5   0   3   17.88    0.49
  -6   0  -3   -0.31    0.14
  -6   0  -3    0.30    0.18
   6   0   3   -0.10    0.19
   6   0   3   -0.04    0.14
  -6   0  -3   -0.12    0.14
   6   0   3   -0.13    0.15
  -7   0  -3   -0.13    0.16
  -7   0  -3    0.01    0.15
   7   0   3    0.11    0.15
  -7   0  -3    0.37    0.20
   7   0   3   -0.21    0.20
   8   0   3   -0.03    0.15
   8   0   3   -0.01    0.16
  -8   0  -3    0.10    0.18
   8   0   3   -0.26    0.25
  -8   0  -3   -0.10    0.17
  -8   0  -3    0.41    0.22
  -9   0  -3   18.04    0.59
  -9   0  -3   18.03    0.50
   9   0   3   16.10    0.61
  -9   0  -3   17.65    0.50
 -10   0  -3    0.00    0.21
  10   0   3   -0.46    0.29
 -10   0  -3   -0.12    0.26
 -10   0  -3   -0.21    0.27
 -11   0  -3    8.85    0.42
 -11   0  -3    8.52    0.53
  11   0   3    7.62    0.56
 -11   0  -3    7.23    0.45
 -12   0  -3   -0.22    0.26
  12   0   3   -0.36    0.47
 -12   0  -3   -0.11    0.29
 -12   0  -3   -0.16    0.25
  13   0   3   14.25    0.79
 -13   0  -3   15.06    0.63
 -13   0  -3   14.97    0.57
 -13   0  -3   15.91    0.72
 -14   0  -3   -0.28    0.39
 -14   0  -3   -0.03    0.32
 -14   0  -3    0.05    0.42
 -14   0  -3   -0.35    0.33
 -15   0  -3    1.18    0.45
 -15   0  -3    1.32    0.46
 -15   0  -3    2.30    0.40
 -15  -1   3    1.69    0.42
 -15   1   3    0.73    0.48
 -14  -1   3    5.25    0.68
 -14  -1   3    3.93    0.53
 -14   1   3    4.37    0.65
 -14   1   3    5.67    0.41
 -13  -1   3    2.32    0.46
 -13  -1   3    1.87    0.33
 -13   1   3    1.85    0.39
 -13   1   3    1.75    0.45
 -13   1   3    2.13    0.25
 -13   1   3    2.25    0.27
 -12  -1   3    3.63    0.39
 -12  -1   3    3.24    0.39
 -12   1   3    3.01    0.32
 -12   1   3    3.57    0.51
 -12   1   3    3.43    0.59
 -11  -1   3    1.55    0.36
 -11  -1   3    0.84    0.27
 -11   1   3    0.72    0.30
 -11   1   3    0.98    0.33
 -10  -1   3    7.59    0.52
 -10  -1   3    6.82    0.44
 -10   1   3    6.74    0.47
 -10   1   3    6.51    0.53
  -9  -1   3    7.04    0.45
  -9  -1   3    6.51    0.39
  -9   1   3    6.53    0.43
  -9   1   3    6.77    0.48
  -8  -1   3   38.11    0.87
  -8  -1   3   40.29    0.91
  -8   1   3   38.10    0.90
  -8   1   3   37.28    0.94
  -7  -1   3    1.73    0.21
  -7  -1   3    1.91    0.31
  -7   1   3    1.87    0.24
  -7   1   3    1.71    0.25
  -6  -1   3    5.29    0.28
  -6  -1   3    5.23    0.31
  -6   1   3    4.98    0.31
  -6   1   3    4.86    0.35
  -5  -1   3    5.81    0.26
  -5  -1   3    5.67    0.28
  -5   1   3    5.83    0.29
  -5   1   3    6.16    0.32
  -4  -1   3    0.99    0.16
  -4  -1   3    0.98    0.16
  -4  -1   3    1.26    0.13
  -4   1   3    1.11    0.16
  -3  -1   3  137.59    2.51
   3  -1  -3  140.78    2.56
  -3  -1   3  139.70    2.53
  -3  -1   3  138.26    2.52
  -3   1   3  138.08    2.49
   3   1  -3  134.58    2.53
  -2  -1   3   33.98    0.67
   2  -1  -3   34.53    0.64
   2  -1  -3   36.05    0.70
  -2  -1   3   34.84    0.66
   2   1  -3   33.58    0.68
  -2   1   3   31.00    0.66
  -2   1   3   35.92    0.69
   2   1  -3   34.74    0.67
   1  -1  -3    8.03    0.23
   1  -1  -3    8.11    0.18
  -1  -1   3    8.29    0.19
   1  -1  -3    8.09    0.18
   1  -1  -3    7.98    0.19
  -1  -1   3    8.36    0.20
  -1  -1   3    8.23    0.19
  -1  -1   3    8.32    0.20
  -1   1   3    7.98    0.20
   1   1  -3    8.25    0.18
  -1   1   3    8.10    0.19
   1   1  -3    8.32    0.21
  -1   1   3    7.68    0.22
  -1   1   3    7.73    0.19
   1   1  -3    8.71    0.21
   0  -1  -3    3.64    0.14
   0  -1   3    3.86    0.14
   0  -1  -3    3.45    0.13
   0  -1   3    3.65    0.12
   0  -1  -3    3.60    0.12
   0  -1   3    3.74    0.14
   0  -1   3    3.59    0.13
   0  -1  -3    3.71    0.14
   0   1   3    3.79    0.13
   0   1   3    3.55    0.13
   0   1  -3    3.78    0.13
   0   1   3    3.43    0.13
   0   1  -3    3.65    0.11
   0   1  -3    3.66    0.13
   0   1  -3    3.54    0.13
   1  -1   3   56.44    1.05
  -1  -1  -3   57.15    1.05
   1  -1   3   57.00    1.05
  -1  -1  -3   54.49    1.04
   1  -1   3   55.39    1.04
  -1  -1  -3   56.46    1.05
   1  -1   3   55.59    1.04
  -1   1  -3   56.07    1.04
   1   1   3   56.39    1.05
  -1   1  -3   55.38    1.04
   1   1   3   56.27    1.04
  -1   1  -3   55.92    1.05
  -1   1  -3   55.07    1.04
  -2  -1  -3   28.22    0.57
   2  -1   3   27.77    0.58
   2  -1   3   27.34    0.56
  -2  -1  -3   27.77    0.56
  -2  -1  -3   28.47    0.57
   2  -1   3   28.19    0.57
   2  -1   3   28.21    0.57
   2   1   3   27.69    0.57
   2   1   3   27.98    0.58
  -2   1  -3   27.75    0.56
   2   1   3   28.23    0.56
  -2   1  -3   27.70    0.56
  -2   1  -3   28.32    0.57
  -2   1  -3   28.01    0.58
  -3  -1  -3   73.03    1.34
  -3  -1  -3   72.05    1.34
   3  -1   3   72.70    1.34
  -3  -1  -3   71.51    1.36
   3  -1   3   70.87    1.34
   3  -1   3   72.05    1.37
  -3   1  -3   71.74    1.37
   3   1   3   72.88    1.34
  -3   1  -3   70.84    1.34
  -3   1  -3   71.25    1.34
  -3   1  -3   71.19    1.34
   3   1   3   71.51    1.36
   3   1   3   69.25    1.34
  -4  -1  -3   10.63    0.32
  -4  -1  -3   10.65    0.30
   4  -1   3   10.41    0.30
   4  -1   3   10.11    0.34
  -4  -1  -3   10.68    0.29
   4  -1   3   10.60    0.30
  -4   1  -3   10.64    0.33
   4   1   3   10.54    0.33
   4   1   3   10.56    0.29
  -4   1  -3   10.45    0.30
   4   1   3   10.45    0.30
  -4   1  -3   10.34    0.29
  -4   1  -3   10.49    0.30
   5  -1   3    5.73    0.26
  -5  -1  -3    5.47    0.28
   5  -1   3    5.47    0.32
   5  -1   3    5.67    0.26
  -5  -1  -3    5.02    0.25
  -5  -1  -3    5.26    0.26
  -5   1  -3    5.14    0.25
  -5   1  -3    5.62    0.30
  -5   1  -3    5.78    0.26
   5   1   3    5.16    0.25
   5   1   3    5.47    0.25
   5   1   3    5.55    0.31
  -5   1  -3    5.95    0.27
  -6  -1  -3   24.45    0.55
   6  -1   3   24.04    0.63
   6  -1   3   24.22    0.54
  -6  -1  -3   24.22    0.60
  -6  -1  -3   24.69    0.56
   6   1   3   23.07    0.53
   6   1   3   24.33    0.54
  -6   1  -3   24.33    0.56
  -6   1  -3   24.45    0.57
  -6   1  -3   24.94    0.56
   6   1   3   24.86    0.63
  -6   1  -3   24.54    0.62
   7  -1   3    1.61    0.27
  -7  -1  -3    1.58    0.18
  -7  -1  -3    1.10    0.18
  -7  -1  -3    1.23    0.21
   7  -1   3    1.50    0.17
  -7   1  -3    1.32    0.19
   7   1   3    1.40    0.24
  -7   1  -3    1.42    0.19
  -7   1  -3    1.34    0.18
  -7   1  -3    1.33    0.21
   7   1   3    1.24    0.16
  -8  -1  -3   24.05    0.58
   8  -1   3   23.77    0.55
  -8  -1  -3   24.44    0.59
   8  -1   3   23.46    0.54
  -8  -1  -3   23.57    0.65
  -8   1  -3   23.92    0.67
  -8   1  -3   24.22    0.58
  -8   1  -3   24.18    0.60
   8   1   3   22.80    0.69
  -8   1  -3   24.44    0.59
  -9  -1  -3    2.46    0.31
  -9  -1  -3    2.04    0.29
   9  -1   3    2.51    0.33
  -9  -1  -3    2.40    0.35
   9   1   3    2.62    0.40
  -9   1  -3    2.40    0.31
  -9   1  -3    2.47    0.29
  -9   1  -3    2.11    0.31
  -9   1  -3    2.35    0.31
  10  -1   3    0.99    0.31
 -10  -1  -3    0.92    0.26
 -10  -1  -3    1.14    0.36
 -10  -1  -3    0.88    0.22
 -10   1  -3    0.42    0.25
 -10   1  -3    0.73    0.24
 -10   1  -3    0.85    0.24
 -10   1  -3    0.97    0.24
 -11  -1  -3   -0.05    0.24
 -11  -1  -3   -0.25    0.26
 -11  -1  -3    0.26    0.28
  11  -1   3   -0.28    0.31
 -11   1  -3   -0.36    0.23
 -11   1  -3   -0.26    0.25
  11   1   3    0.40    0.33
 -11   1  -3    0.24    0.24
 -11   1  -3    0.81    0.35
 -12  -1  -3    3.86    0.48
 -12  -1  -3    3.41    0.42
 -12  -1  -3    4.09    0.41
 -12   1  -3    4.20    0.50
 -12   1  -3    3.87    0.43
 -12   1  -3    3.74    0.41
 -12   1  -3    4.33    0.42
 -13  -1  -3    0.21    0.30
 -13  -1  -3    0.10    0.33
  13  -1   3    0.28    0.45
 -13   1  -3    0.08    0.32
 -13   1  -3    1.10    0.30
  13   1   3    0.15    0.54
 -13   1  -3   -0.26    0.28
 -13   1  -3    0.52    0.36
 -14  -1  -3    1.24    0.40
 -14  -1  -3    1.84    0.33
 -14  -1  -3    0.93    0.35
 -14   1  -3    2.42    0.43
 -14   1  -3    1.53    0.33
 -14   1  -3    1.51    0.32
 -14   1  -3    1.31    0.43
 -15  -1  -3   -0.25    0.43
 -15  -1  -3    0.25    0.43
 -15   1  -3    0.86    0.42
 -15   1  -3   -0.18    0.50
 -15   1  -3    0.43    0.57
 -15  -2   3    0.78    0.37
 -15  -2   3    0.43    0.36
 -15   2   3    0.12    0.32
 -15   2   3    1.13    0.40
 -15   2   3    0.31    0.44
 -14  -2   3    1.16    0.35
 -14  -2   3   -0.49    0.40
 -14   2   3    0.44    0.40
 -14   2   3    0.85    0.29
 -14   2   3    0.43    0.30
 -14   2   3   -0.12    0.34
 -13  -2   3   -0.10    0.27
 -13  -2   3    0.51    0.36
 -13   2   3    0.12    0.45
 -13   2   3    0.17    0.26
 -13   2   3    0.16    0.36
 -13   2   3   -0.10    0.23
 -12  -2   3    0.69    0.35
 -12  -2   3   -0.08    0.35
 -12   2   3    0.54    0.20
 -12   2   3    0.77    0.23
 -12   2   3    0.83    0.37
 -12   2   3    0.21    0.31
 -11  -2   3    3.67    0.37
 -11  -2   3    3.29    0.39
 -11   2   3    2.96    0.43
 -11   2   3    3.08    0.55
 -11   2   3    2.69    0.27
 -11   2   3    2.55    0.31
 -10  -2   3    0.77    0.23
 -10  -2   3    0.72    0.28
 -10   2   3    1.32    0.33
 -10   2   3    0.86    0.30
  -9  -2   3    4.13    0.73
  -9  -2   3    2.91    0.33
  -9   2   3    2.87    0.38
  -9   2   3    3.00    0.44
  -8  -2   3    5.26    0.32
  -8  -2   3    5.78    0.38
  -8   2   3    5.79    0.38
  -8   2   3    5.10    0.48
  -7  -2   3   20.72    0.56
  -7  -2   3   20.11    0.52
  -7   2   3   20.38    0.58
   7   2  -3   20.52    0.54
  -7   2   3   20.06    0.61
  -6  -2   3   26.62    0.63
  -6  -2   3   27.12    0.61
  -6   2   3   27.97    0.70
   6   2  -3   27.48    0.62
  -6   2   3   26.74    0.67
  -5  -2   3    0.28    0.16
  -5  -2   3    0.30    0.13
   5   2  -3    0.29    0.14
  -5   2   3    0.51    0.17
  -5   2   3    0.26    0.17
  -4  -2   3   46.14    0.91
  -4  -2   3   45.52    0.90
  -4  -2   3   44.77    0.88
  -4   2   3   46.18    0.95
  -3  -2   3  202.45    3.66
  -3  -2   3  208.23    3.68
  -3  -2   3  201.30    3.69
  -3   2   3  204.62    3.66
  -3   2   3  208.83    3.72
  -3   2   3  199.14    3.65
   3   2  -3  201.68    3.69
  -2  -2   3  180.59    3.31
  -2  -2   3  183.10    3.28
  -2  -2   3  181.02    3.30
   2  -2  -3  181.54    3.34
   2  -2  -3  183.69    3.30
  -2  -2   3  186.94    3.28
   2   2  -3  181.21    3.31
  -2   2   3  184.39    3.29
   2   2  -3  180.98    3.30
  -2   2   3  186.31    3.33
  -2   2   3  182.10    3.29
   1  -2  -3   15.36    0.30
  -1  -2   3   15.40    0.35
   1  -2  -3   15.11    0.33
  -1  -2   3   15.14    0.32
   1  -2  -3   15.29    0.32
  -1  -2   3   15.19    0.33
   1  -2  -3   15.39    0.36
   1   2  -3   15.26    0.31
  -1   2   3   15.48    0.36
   1   2  -3   15.57    0.34
  -1   2   3   14.64    0.34
   1   2  -3   15.57    0.33
   1   2  -3   15.26    0.32
  -1   2   3   15.84    0.33
   0  -2  -3   59.28    1.10
   0  -2   3   60.57    1.09
   0  -2   3   60.59    1.11
   0  -2  -3   59.12    1.11
   0  -2   3   59.70    1.11
   0  -2  -3   57.59    1.11
   0  -2   3   59.09    1.11
   0   2   3   59.53    1.11
   0   2   3   61.07    1.11
   0   2  -3   59.87    1.11
   0   2  -3   58.00    1.09
   0   2  -3   58.83    1.11
   0   2   3   59.54    1.11
   1  -2   3  163.92    3.00
   1  -2   3  168.31    3.00
  -1  -2  -3  161.36    2.99
  -1  -2  -3  165.81    3.00
   1  -2   3  169.47    3.00
   1  -2   3  164.51    2.99
  -1  -2  -3  164.07    3.00
   1   2   3  167.36    3.00
   1   2   3  164.07    3.00
  -1   2  -3  165.71    2.99
  -1   2  -3  163.80    2.99
  -1   2  -3  166.60    3.00
   1   2   3  166.00    3.00
  -1   2  -3  167.31    3.00
   2  -2   3    4.55    0.20
  -2  -2  -3    4.68    0.21
  -2  -2  -3    4.92    0.20
   2  -2   3    4.79    0.23
   2  -2   3    4.32    0.22
  -2  -2  -3    4.51    0.19
  -2   2  -3    4.33    0.22
  -2   2  -3    4.69    0.19
  -2   2  -3    4.44    0.21
   2   2   3    4.76    0.19
   2   2   3    4.51    0.20
  -2   2  -3    4.74    0.22
  -3  -2  -3    0.12    0.10
  -3  -2  -3   -0.04    0.11
   3  -2   3    0.02    0.11
  -3  -2  -3    0.02    0.09
   3  -2   3    0.09    0.10
   3  -2   3   -0.10    0.11
   3  -2   3    0.08    0.12
  -3   2  -3    0.01    0.11
  -3   2  -3    0.03    0.09
   3   2   3    0.02    0.10
   3   2   3    0.06    0.10
  -3   2  -3    0.07    0.11
   3   2   3    0.10    0.11
  -3   2  -3   -0.01    0.10
  -4  -2  -3    0.48    0.12
  -4  -2  -3    0.45    0.12
   4  -2   3    0.45    0.15
   4  -2   3    0.63    0.14
   4  -2   3    0.57    0.13
   4   2   3    0.46    0.13
   4   2   3    0.29    0.13
  -4   2  -3    0.61    0.14
  -4   2  -3    0.49    0.11
  -4   2  -3    0.37    0.12
  -4   2  -3    0.42    0.15
   4   2   3    0.50    0.13
  -5  -2  -3   33.94    0.73
  -5  -2  -3   32.47    0.69
   5  -2   3   34.18    0.77
   5  -2   3   33.15    0.70
   5  -2   3   32.47    0.69
   5   2   3   33.41    0.69
  -5   2  -3   33.24    0.76
   5   2   3   33.67    0.74
  -5   2  -3   33.54    0.71
   5   2   3   32.05    0.69
  -5   2  -3   32.67    0.69
  -5   2  -3   34.31    0.70
  -6  -2  -3    3.03    0.26
   6  -2   3    3.01    0.25
  -6  -2  -3    2.77    0.23
  -6  -2  -3    2.44    0.25
   6  -2   3    3.23    0.34
   6  -2   3    2.81    0.24
  -6   2  -3    2.70    0.30
  -6   2  -3    3.04    0.23
   6   2   3    2.47    0.23
   6   2   3    3.21    0.30
   6   2   3    2.64    0.22
  -6   2  -3    3.12    0.24
  -6   2  -3    2.45    0.25
  -7  -2  -3    6.52    0.31
  -7  -2  -3    6.48    0.29
   7  -2   3    6.04    0.44
  -7  -2  -3    6.51    0.33
  -7   2  -3    6.37    0.37
  -7   2  -3    6.83    0.30
   7   2   3    6.50    0.27
  -7   2  -3    6.62    0.31
   7   2   3    6.46    0.28
   7   2   3    5.86    0.37
  -7   2  -3    6.48    0.30
   8  -2   3    3.37    0.38
   8  -2   3    3.84    0.27
  -8  -2  -3    3.94    0.33
  -8  -2  -3    3.74    0.28
  -8  -2  -3    4.58    0.31
  -8   2  -3    3.97    0.30
  -8   2  -3    4.22    0.29
  -8   2  -3    4.22    0.30
   8   2   3    4.51    0.39
  -8   2  -3    3.53    0.36
  -9  -2  -3    0.44    0.22
  -9  -2  -3    0.04    0.20
   9  -2   3    0.26    0.30
  -9  -2  -3    0.39    0.24
  -9   2  -3    0.57    0.26
  -9   2  -3    0.26    0.22
   9   2   3   -0.12    0.27
  -9   2  -3    0.02    0.21
  -9   2  -3    0.18    0.22
  10  -2   3    2.13    0.33
 -10  -2  -3    2.23    0.28
 -10  -2  -3    2.45    0.31
 -10  -2  -3    2.47    0.25
 -10   2  -3    2.27    0.27
 -10   2  -3    1.93    0.26
  10   2   3    2.69    0.35
 -10   2  -3    2.69    0.28
 -11  -2  -3   15.90    0.60
 -11  -2  -3   15.82    0.54
 -11  -2  -3   15.51    0.52
 -11   2  -3   15.43    0.55
  11   2   3   15.05    0.65
 -11   2  -3   15.63    0.65
 -11   2  -3   15.47    0.52
 -11   2  -3   15.50    0.55
 -12  -2  -3    6.67    0.51
 -12  -2  -3    6.72    0.44
 -12  -2  -3    7.02    0.45
 -12   2  -3    6.91    0.54
 -12   2  -3    7.18    0.47
 -12   2  -3    6.53    0.43
 -12   2  -3    7.33    0.46
 -13  -2  -3   -0.10    0.34
 -13  -2  -3    0.06    0.44
  13  -2   3   -0.43    0.44
 -13  -2  -3    0.19    0.30
 -13   2  -3    0.12    0.44
 -13   2  -3    0.15    0.30
  13   2   3   -0.28    0.43
 -13   2  -3    0.40    0.28
 -14  -2  -3    3.27    0.49
 -14  -2  -3    2.62    0.39
 -14  -2  -3    2.64    0.44
 -14   2  -3    2.99    0.38
 -14   2  -3    2.90    0.39
 -14   2  -3    2.74    0.39
 -14   2  -3    4.59    0.64
 -15  -2  -3    1.06    0.40
 -15  -2  -3    1.97    0.38
 -15  -2  -3    1.10    0.45
 -15   2  -3    0.61    0.47
 -15   2  -3    0.94    0.39
 -15   2  -3    0.26    0.44
 -15   2  -3    0.33    0.56
 -15  -3   3   -0.84    0.47
 -15  -3   3   -0.23    0.40
 -15  -3   3   -0.36    0.38
 -15   3   3   -0.27    0.51
 -15   3   3   -0.07    0.36
 -14  -3   3    0.46    0.36
 -14  -3   3    1.34    0.43
 -14  -3   3    0.99    0.25
 -14   3   3    0.46    0.33
 -14   3   3    0.48    0.31
 -14   3   3    0.63    0.46
 -14   3   3    0.47    0.29
 -13  -3   3    2.41    0.34
 -13  -3   3    3.28    0.34
 -13  -3   3    2.86    0.42
 -13   3   3    3.78    0.55
 -13   3   3    2.79    0.31
 -13   3   3    2.08    0.44
 -13   3   3    2.61    0.40
 -13   3   3    2.64    0.36
 -12  -3   3    4.95    0.49
 -12  -3   3    4.35    0.47
 -12   3   3    4.00    0.38
 -12   3   3    4.23    0.55
 -12   3   3    4.20    0.34
 -11  -3   3    3.80    0.46
 -11  -3   3    4.63    0.40
 -11   3   3    5.19    0.60
 -11   3   3    4.39    0.52
 -11   3   3    4.04    0.33
 -11   3   3    4.38    0.30
 -10  -3   3   10.41    0.45
 -10   3   3   10.38    0.63
 -10   3   3    9.94    0.35
 -10   3   3   10.50    0.38
 -10   3   3    9.79    0.55
  -9  -3   3    8.20    0.39
  -9  -3   3    8.19    0.45
   9   3  -3    8.33    0.43
  -9   3   3    7.72    0.47
  -9   3   3    8.02    0.52
  -9   3   3    8.75    0.31
  -9   3   3    8.54    0.33
  -8  -3   3   39.85    0.90
  -8  -3   3   40.14    0.87
  -8   3   3   40.81    0.97
  -8   3   3   39.79    0.81
  -8   3   3   38.98    0.79
   8   3  -3   39.30    0.89
  -7  -3   3    3.38    0.24
  -7  -3   3    3.43    0.29
   7   3  -3    3.67    0.27
  -7   3   3    3.45    0.20
  -7   3   3    3.36    0.22
  -7   3   3    2.77    0.33
  -6  -3   3    3.82    0.26
  -6  -3   3    4.05    0.23
  -6   3   3    3.98    0.31
  -6   3   3    4.31    0.36
   6   3  -3    3.69    0.25
  -6   3   3    4.14    0.20
  -6   3   3    3.90    0.22
  -5  -3   3   47.64    0.94
  -5  -3   3   47.82    0.96
  -5  -3   3   47.80    0.98
  -5   3   3   49.06    1.04
  -5   3   3   48.33    0.93
  -5   3   3   47.40    0.91
   5   3  -3   47.18    0.95
  -4  -3   3   93.26    1.74
  -4  -3   3   94.85    1.77
  -4  -3   3   92.04    1.72
   4   3  -3   92.81    1.72
  -4   3   3   94.22    1.81
  -4   3   3   94.14    1.73
  -4   3   3   94.21    1.72
  -3  -3   3   41.27    0.77
  -3  -3   3   41.27    0.79
   3  -3  -3   41.12    0.78
   3  -3  -3   40.89    0.77
  -3  -3   3   41.13    0.82
  -3  -3   3   41.59    0.78
  -3   3   3   41.11    0.80
  -3   3   3   41.39    0.78
  -3   3   3   41.83    0.85
   3   3  -3   40.79    0.80
   2  -3  -3    1.87    0.20
  -2  -3   3    2.01    0.15
  -2  -3   3    1.81    0.17
  -2  -3   3    1.86    0.13
   2  -3  -3    1.77    0.13
   2  -3  -3    1.74    0.15
   2   3  -3    1.85    0.17
   2   3  -3    1.75    0.13
  -2   3   3    1.97    0.19
   2   3  -3    1.67    0.13
  -2   3   3    1.61    0.16
  -2   3   3    1.96    0.14
   2   3  -3    1.60    0.11
  -1  -3   3   43.96    0.85
   1  -3  -3   42.99    0.86
   1  -3  -3   43.89    0.83
   1  -3  -3   42.88    0.84
  -1  -3   3   44.21    0.84
  -1   3   3   43.75    0.85
   1   3  -3   43.37    0.82
  -1   3   3   44.86    0.83
   1   3  -3   43.16    0.83
   1   3  -3   43.53    0.85
  -1   3   3   43.95    0.85
   0  -3   3    5.30    0.20
   0  -3   3    5.29    0.22
   0  -3  -3    5.46    0.19
   0  -3   3    5.22    0.20
   0  -3  -3    5.28    0.21
   0  -3  -3    5.51    0.19
   0   3  -3    5.18    0.22
   0   3  -3    5.43    0.17
   0   3  -3    5.15    0.19
   0   3  -3    5.61    0.20
   0   3   3    5.49    0.18
   0   3   3    5.61    0.19
   0   3   3    5.45    0.22
   1  -3   3    2.51    0.19
  -1  -3  -3    2.49    0.16
   1  -3   3    2.53    0.18
  -1  -3  -3    2.54    0.19
   1  -3   3    2.14    0.20
   1  -3   3    2.68    0.17
  -1  -3  -3    2.60    0.14
  -1   3  -3    2.56    0.20
  -1   3  -3    2.76    0.17
  -1   3  -3    2.54    0.17
   1   3   3    2.64    0.19
   1   3   3    2.52    0.17
   1   3   3    2.62    0.16
  -1   3  -3    2.58    0.17
  -2  -3  -3   29.79    0.61
   2  -3   3   30.15    0.60
  -2  -3  -3   30.75    0.62
   2  -3   3   30.44    0.62
   2  -3   3   30.26    0.63
  -2  -3  -3   29.75    0.61
   2  -3   3   29.96    0.61
   2   3   3   30.69    0.61
  -2   3  -3   29.70    0.63
   2   3   3   30.58    0.62
  -2   3  -3   30.07    0.62
  -2   3  -3   30.07    0.61
  -2   3  -3   30.07    0.60
   2   3   3   30.04    0.62
   3  -3   3    1.24    0.20
   3  -3   3    1.15    0.14
  -3  -3  -3    1.23    0.15
  -3  -3  -3    1.25    0.18
  -3  -3  -3    1.27    0.16
   3  -3   3    1.24    0.15
   3  -3   3    1.34    0.15
   3   3   3    1.13    0.16
   3   3   3    1.04    0.13
  -3   3  -3    1.19    0.20
  -3   3  -3    1.32    0.17
  -3   3  -3    1.17    0.15
  -3   3  -3    1.30    0.15
   3   3   3    1.29    0.16
  -4  -3  -3    7.57    0.27
   4  -3   3    7.18    0.33
   4  -3   3    7.51    0.29
   4  -3   3    7.36    0.28
  -4  -3  -3    7.12    0.26
   4  -3   3    7.28    0.26
  -4  -3  -3    7.09    0.28
  -4   3  -3    7.36    0.25
   4   3   3    7.23    0.29
   4   3   3    7.44    0.26
  -4   3  -3    7.24    0.27
   4   3   3    7.64    0.29
  -4   3  -3    7.42    0.30
  -4   3  -3    7.30    0.33
  -5  -3  -3    0.16    0.16
  -5  -3  -3   -0.09    0.14
  -5  -3  -3    0.20    0.15
   5  -3   3   -0.03    0.16
   5  -3   3   -0.38    0.18
   5  -3   3    0.16    0.17
   5   3   3   -0.13    0.14
   5   3   3    0.10    0.15
  -5   3  -3    0.16    0.17
  -5   3  -3   -0.14    0.17
  -5   3  -3    0.25    0.15
   5   3   3    0.35    0.19
  -5   3  -3    0.02    0.13
  -6  -3  -3    8.28    0.32
   6  -3   3    8.04    0.39
  -6  -3  -3    7.95    0.32
   6  -3   3    7.54    0.31
   6  -3   3    8.02    0.32
  -6  -3  -3    8.58    0.30
   6   3   3    8.27    0.36
  -6   3  -3    8.19    0.33
  -6   3  -3    8.23    0.29
  -6   3  -3    8.01    0.38
   6   3   3    8.23    0.29
  -6   3  -3    8.11    0.31
   6   3   3    8.36    0.30
   7  -3   3    1.04    0.23
   7  -3   3    1.26    0.19
  -7  -3  -3    1.53    0.25
  -7  -3  -3    1.62    0.18
   7   3   3    1.70    0.24
   7   3   3    1.52    0.17
  -7   3  -3    1.17    0.22
  -7   3  -3    1.46    0.19
  -7   3  -3    1.41    0.20
  -7   3  -3    1.36    0.17
   7   3   3    1.41    0.17
  -8  -3  -3    0.65    0.21
  -8  -3  -3    0.71    0.21
   8  -3   3    0.58    0.24
   8  -3   3    0.63    0.19
   8  -3   3    0.79    0.19
  -8  -3  -3    0.65    0.18
  -8   3  -3    1.02    0.21
   8   3   3    0.86    0.17
  -8   3  -3    0.88    0.19
  -8   3  -3    0.60    0.21
  -8   3  -3    0.79    0.26
   8   3   3    0.84    0.26
  -9  -3  -3    2.54    0.24
   9  -3   3    2.30    0.33
   9  -3   3    2.67    0.29
  -9  -3  -3    2.50    0.32
  -9  -3  -3    2.33    0.34
  -9   3  -3    2.51    0.32
  -9   3  -3    2.73    0.37
  -9   3  -3    2.28    0.34
   9   3   3    2.56    0.34
  -9   3  -3    2.78    0.34
 -10  -3  -3    0.66    0.23
 -10  -3  -3    0.73    0.25
 -10  -3  -3    0.90    0.26
 -10   3  -3    0.40    0.26
 -10   3  -3    0.58    0.26
 -10   3  -3    0.87    0.23
  10   3   3    1.08    0.31
 -10   3  -3    0.76    0.27
 -11  -3  -3    7.37    0.43
 -11  -3  -3    7.21    0.48
 -11  -3  -3    7.35    0.44
 -11   3  -3    7.75    0.56
 -11   3  -3    7.77    0.47
 -11   3  -3    7.41    0.43
 -11   3  -3    7.83    0.43
 -12  -3  -3    1.81    0.34
 -12  -3  -3    2.23    0.30
 -12  -3  -3    2.14    0.33
 -12   3  -3    2.03    0.30
 -12   3  -3    1.92    0.42
 -12   3  -3    1.95    0.30
 -12   3  -3    2.22    0.40
 -13  -3  -3    1.97    0.34
 -13  -3  -3    1.15    0.37
 -13  -3  -3    1.77    0.31
 -13   3  -3    2.59    0.41
 -13   3  -3    2.19    0.35
 -13   3  -3    1.46    0.31
  13   3   3    1.25    0.49
 -14  -3  -3    0.26    0.38
 -14  -3  -3    0.46    0.33
 -14  -3  -3   -0.16    0.36
 -14   3  -3    0.29    0.34
 -14   3  -3   -0.21    0.38
 -14   3  -3    0.31    0.37
 -15  -3  -3    1.01    0.47
 -15  -3  -3    0.42    0.41
 -15   3  -3    0.04    0.50
 -15   3  -3   -0.63    0.43
 -15   3  -3    0.28    0.44
 -15   3  -3    0.56    0.40
 -15  -4   3    5.52    0.59
 -15  -4   3    7.30    0.66
 -15  -4   3    4.55    0.77
 -15   4   3    5.71    0.53
 -15   4   3    5.68    0.87
 -14  -4   3    0.32    0.30
 -14  -4   3    1.30    0.38
 -14  -4   3    1.16    0.27
 -14   4   3    0.92    0.41
 -14   4   3    1.00    0.33
 -14   4   3    1.37    0.29
 -13  -4   3    0.46    0.34
 -13  -4   3    0.71    0.26
 -13  -4   3    1.30    0.23
 -13  -4   3    0.56    0.29
 -13   4   3    0.48    0.41
 -13   4   3    0.69    0.26
 -13   4   3    0.61    0.29
 -13   4   3    0.31    0.31
 -12  -4   3    7.10    0.49
 -12  -4   3    8.22    0.36
 -12  -4   3    8.46    0.55
 -12   4   3    8.59    0.63
 -12   4   3    8.14    0.61
 -12   4   3    8.62    0.39
 -12   4   3    8.72    0.45
 -12   4   3    9.09    0.75
 -11  -4   3    0.47    0.32
 -11  -4   3    0.16    0.22
 -11   4   3    0.18    0.19
 -11   4   3   -0.02    0.30
 -11   4   3    0.84    0.40
 -11   4   3    0.27    0.21
 -11   4   3   -0.24    0.22
 -10  -4   3    0.91    0.29
 -10  -4   3    1.00    0.23
 -10   4   3    0.53    0.20
 -10   4   3    0.81    0.22
  10   4  -3    0.52    0.27
 -10   4   3    0.65    0.18
 -10   4   3    0.18    0.33
  -9  -4   3    3.18    0.30
  -9  -4   3    3.23    0.37
  -9   4   3    3.05    0.46
  -9   4   3    2.48    0.31
  -9   4   3    2.74    0.26
  -9   4   3    3.02    0.24
  -9   4   3    3.51    0.31
   9   4  -3    3.19    0.35
  -8  -4   3    0.40    0.21
  -8  -4   3    0.39    0.17
  -8   4   3   -0.11    0.25
  -8   4   3    0.17    0.17
  -8   4   3    0.12    0.13
   8   4  -3    0.24    0.19
  -8   4   3    0.54    0.27
  -8   4   3    0.21    0.15
  -7  -4   3    1.17    0.16
  -7  -4   3    0.88    0.18
   7   4  -3    0.98    0.18
  -7   4   3    0.90    0.21
  -7   4   3    0.80    0.25
  -7   4   3    1.15    0.17
  -7   4   3    1.23    0.15
  -6  -4   3    1.33    0.17
  -6  -4   3    1.32    0.21
  -6  -4   3    1.29    0.19
  -6  -4   3    1.13    0.13
  -6   4   3    1.18    0.24
  -6   4   3    1.19    0.14
   6   4  -3    1.30    0.17
  -6   4   3    1.37    0.17
  -6   4   3    1.41    0.23
  -5  -4   3   61.27    1.17
  -5  -4   3   60.84    1.17
  -5  -4   3   60.85    1.15
  -5  -4   3   61.74    1.19
  -5  -4   3   62.65    1.24
  -5   4   3   62.32    1.19
  -5   4   3   63.82    1.29
   5   4  -3   60.53    1.18
  -5   4   3   62.33    1.17
  -4  -4   3   29.47    0.58
  -4  -4   3   28.53    0.59
   4  -4  -3   28.24    0.57
   4  -4  -3   28.86    0.59
  -4  -4   3   29.19    0.57
  -4  -4   3   28.54    0.56
  -4  -4   3   27.57    0.64
  -4   4   3   29.15    0.69
  -4   4   3   29.36    0.59
  -4   4   3   28.57    0.61
   4   4  -3   27.60    0.58
  -3  -4   3   24.28    0.49
  -3  -4   3   24.33    0.51
   3  -4  -3   23.74    0.51
   3  -4  -3   23.99    0.49
  -3  -4   3   24.26    0.54
  -3  -4   3   23.81    0.48
  -3   4   3   24.51    0.51
  -3   4   3   24.20    0.53
   3   4  -3   22.90    0.49
  -3   4   3   24.65    0.57
  -2  -4   3   71.54    1.34
   2  -4  -3   70.90    1.38
   2  -4  -3   68.06    1.32
  -2  -4   3   71.51    1.32
  -2  -4   3   70.30    1.35
   2  -4  -3   70.94    1.34
   2   4  -3   71.73    1.33
   2   4  -3   73.18    1.36
  -2   4   3   72.03    1.37
  -2   4   3   73.04    1.33
   2   4  -3   69.59    1.31
   2   4  -3   73.10    1.32
  -2   4   3   71.50    1.35
  -1  -4   3    0.38    0.11
  -1  -4   3    0.27    0.09
  -1  -4   3    0.18    0.12
   1  -4  -3    0.20    0.11
   1  -4  -3    0.30    0.10
   1  -4  -3    0.23    0.11
   1   4  -3    0.24    0.11
  -1   4   3    0.17    0.09
  -1   4   3    0.19    0.11
   1   4  -3    0.40    0.09
   1   4  -3    0.37    0.11
  -1   4   3    0.33    0.10
   0  -4  -3    0.65    0.10
   0  -4   3    0.52    0.10
   0  -4   3    0.59    0.12
   0  -4  -3    0.68    0.12
   0  -4  -3    0.57    0.10
   0  -4   3    0.49    0.10
   0   4   3    0.56    0.12
   0   4  -3    0.60    0.10
   0   4   3    0.48    0.09
   0   4  -3    0.70    0.12
   0   4  -3    0.57    0.09
   0   4  -3    0.53    0.10
   0   4   3    0.64    0.10
  -1  -4  -3    1.40    0.18
   1  -4   3    1.49    0.14
   1  -4   3    1.40    0.16
  -1  -4  -3    1.49    0.12
  -1  -4  -3    1.46    0.14
   1  -4   3    1.23    0.18
   1   4   3    1.52    0.18
   1   4   3    1.56    0.14
  -1   4  -3    1.51    0.15
  -1   4  -3    1.46    0.17
  -1   4  -3    1.54    0.16
  -1   4  -3    1.37    0.15
   1   4   3    1.42    0.14
  -2  -4  -3    2.45    0.16
  -2  -4  -3    2.31    0.17
   2  -4   3    2.56    0.21
   2  -4   3    2.52    0.16
  -2  -4  -3    2.45    0.20
   2  -4   3    2.36    0.19
  -2   4  -3    2.56    0.16
  -2   4  -3    2.15    0.21
   2   4   3    2.62    0.17
   2   4   3    2.16    0.20
  -2   4  -3    2.52    0.20
   2   4   3    2.57    0.17
  -2   4  -3    2.58    0.18
   3  -4   3    0.23    0.15
   3  -4   3    0.40    0.14
  -3  -4  -3    0.38    0.14
  -3  -4  -3    0.10    0.12
   3  -4   3    0.24    0.14
   3  -4   3    0.24    0.12
  -3  -4  -3    0.24    0.11
  -3   4  -3    0.39    0.15
  -3   4  -3    0.11    0.14
   3   4   3    0.15    0.11
  -3   4  -3    0.31    0.12
   3   4   3    0.39    0.13
   3   4   3    0.21    0.14
  -3   4  -3    0.26    0.13
   4  -4   3   16.15    0.42
   4  -4   3   16.15    0.47
  -4  -4  -3   15.44    0.40
  -4  -4  -3   15.49    0.40
  -4  -4  -3   15.77    0.43
   4  -4   3   15.84    0.43
   4  -4   3   15.34    0.40
   4   4   3   15.57    0.40
  -4   4  -3   15.13    0.46
  -4   4  -3   15.49    0.43
  -4   4  -3   15.89    0.41
  -4   4  -3   15.77    0.39
   4   4   3   15.79    0.42
   4   4   3   15.30    0.42
  -5  -4  -3   -0.01    0.13
  -5  -4  -3   -0.07    0.13
   5  -4   3   -0.04    0.18
   5  -4   3    0.18    0.16
   5  -4   3   -0.05    0.15
  -5  -4  -3    0.12    0.16
   5  -4   3    0.18    0.18
  -5   4  -3   -0.01    0.15
  -5   4  -3    0.19    0.18
   5   4   3    0.02    0.16
   5   4   3    0.00    0.15
  -5   4  -3    0.11    0.18
   5   4   3    0.04    0.14
  -5   4  -3   -0.03    0.13
   6  -4   3    0.67    0.19
  -6  -4  -3    0.72    0.16
  -6  -4  -3    0.68    0.16
   6  -4   3    0.49    0.21
  -6  -4  -3    0.84    0.18
   6  -4   3    0.86    0.18
  -6   4  -3    0.83    0.19
   6   4   3    0.68    0.15
  -6   4  -3    0.84    0.16
  -6   4  -3    0.65    0.22
  -6   4  -3    0.69    0.17
   6   4   3    0.60    0.17
   6   4   3    0.63    0.19
  -7  -4  -3    1.65    0.19
  -7  -4  -3    1.55    0.21
  -7  -4  -3    1.55    0.21
   7  -4   3    1.53    0.20
   7  -4   3    1.28    0.30
  -7   4  -3    1.60    0.19
  -7   4  -3    1.54    0.22
   7   4   3    1.60    0.24
  -7   4  -3    1.68    0.24
  -7   4  -3    1.56    0.20
   7   4   3    1.54    0.19
   7   4   3    1.65    0.18
   8  -4   3   -0.07    0.20
   8  -4   3    0.62    0.28
  -8  -4  -3   -0.06    0.17
   8  -4   3   -0.12    0.20
  -8  -4  -3   -0.24    0.18
  -8   4  -3   -0.15    0.22
   8   4   3    0.03    0.16
   8   4   3    0.00    0.17
  -8   4  -3    0.22    0.23
   8   4   3   -0.13    0.24
  -8   4  -3   -0.21    0.17
   9  -4   3    2.89    0.30
  -9  -4  -3    2.30    0.32
   9  -4   3    2.75    0.35
   9  -4   3    2.65    0.31
  -9  -4  -3    2.78    0.34
   9   4   3    2.93    0.35
  -9   4  -3    2.87    0.37
  -9   4  -3    3.29    0.45
  -9   4  -3    2.90    0.43
 -10  -4  -3   -0.01    0.23
 -10  -4  -3    0.13    0.26
 -10   4  -3   -0.16    0.23
 -10   4  -3   -0.13    0.30
  10   4   3   -0.38    0.46
 -10   4  -3   -0.10    0.34
 -10   4  -3   -0.32    0.25
 -11  -4  -3    4.23    0.45
 -11  -4  -3    4.53    0.40
 -11  -4  -3    4.33    0.42
 -11   4  -3    4.61    0.52
 -11   4  -3    4.40    0.41
 -11   4  -3    4.07    0.43
 -11   4  -3    4.25    0.37
  11   4   3    4.10    0.53
 -12  -4  -3    0.01    0.27
 -12  -4  -3    0.23    0.29
 -12  -4  -3   -0.19    0.31
 -12   4  -3   -0.12    0.28
 -12   4  -3    0.14    0.27
 -12   4  -3    0.56    0.32
 -12   4  -3   -0.50    0.38
 -13  -4  -3    0.25    0.32
 -13  -4  -3    0.74    0.32
 -13  -4  -3    0.57    0.31
 -13   4  -3    0.41    0.29
 -13   4  -3    0.37    0.44
 -13   4  -3    0.46    0.34
  13   4   3    1.01    0.46
 -13   4  -3    0.88    0.31
 -14  -4  -3    0.46    0.35
 -14  -4  -3    0.85    0.41
 -14  -4  -3    0.93    0.36
 -14   4  -3    1.27    0.45
 -14   4  -3    1.24    0.36
 -14   4  -3    0.11    0.42
 -14   4  -3    0.91    0.38
 -14  -5   3    1.34    0.35
 -14  -5   3    2.36    0.47
 -14  -5   3    2.20    0.43
 -14  -5   3    1.25    0.35
 -14   5   3    0.40    0.34
 -14   5   3    1.49    0.48
 -13  -5   3   -0.19    0.31
 -13  -5   3    0.58    0.33
 -13  -5   3    0.32    0.24
 -13  -5   3   -0.31    0.37
 -13   5   3   -0.42    0.30
 -13   5   3    0.19    0.23
 -13   5   3    0.16    0.37
 -12  -5   3    0.89    0.25
 -12  -5   3    0.64    0.33
 -12  -5   3    1.05    0.34
 -12  -5   3    1.02    0.27
 -12  -5   3    0.80    0.22
 -12   5   3    1.41    0.29
 -12   5   3    0.94    0.22
 -12   5   3    1.20    0.38
 -12   5   3    0.50    0.33
 -12   5   3    1.54    0.52
 -11  -5   3    0.09    0.52
 -11  -5   3    0.07    0.19
 -11  -5   3    0.17    0.22
 -11  -5   3    0.40    0.31
 -11  -5   3    0.17    0.22
 -11   5   3    0.11    0.25
 -11   5   3    0.28    0.17
 -11   5   3    0.19    0.40
  11   5  -3    0.58    0.28
 -11   5   3    0.11    0.32
 -11   5   3   -0.29    0.29
 -10  -5   3    1.58    0.20
 -10  -5   3    1.54    0.30
 -10  -5   3    1.76    0.23
 -10  -5   3    1.85    0.44
 -10  -5   3    1.72    0.22
 -10   5   3    1.92    0.37
 -10   5   3    1.70    0.24
 -10   5   3    2.06    0.26
 -10   5   3    1.88    0.18
  10   5  -3    1.66    0.49
  -9  -5   3    1.15    0.25
  -9  -5   3    1.02    0.19
  -9  -5   3    1.15    0.20
  -9  -5   3    0.68    0.28
  -9  -5   3    1.12    0.18
  -9   5   3    1.39    0.15
  -9   5   3    1.03    0.33
   9   5  -3    1.15    0.24
  -9   5   3    1.51    0.23
  -9   5   3    1.08    0.20
  -9   5   3    1.12    0.33
  -8  -5   3   11.87    0.37
  -8  -5   3   11.93    0.42
  -8  -5   3   11.36    0.48
  -8  -5   3   11.85    0.38
  -8  -5   3   11.73    0.34
  -8   5   3   12.49    0.41
   8   5  -3   11.74    0.43
  -8   5   3   12.04    0.38
  -8   5   3   11.86    0.53
  -8   5   3   12.05    0.59
  -7  -5   3    1.49    0.20
  -7  -5   3    1.27    0.15
  -7  -5   3    1.32    0.18
  -7  -5   3    1.31    0.25
  -7  -5   3    1.45    0.18
  -7   5   3    1.47    0.17
  -7   5   3    1.73    0.20
  -7   5   3    1.31    0.33
   7   5  -3    1.49    0.20
  -7   5   3    1.49    0.26
  -6  -5   3    2.89    0.21
  -6  -5   3    2.89    0.30
  -6  -5   3    3.55    0.19
  -6  -5   3    2.73    0.24
  -6  -5   3    2.99    0.20
  -6   5   3    3.42    0.33
  -6   5   3    3.14    0.26
  -6   5   3    3.31    0.22
   6   5  -3    3.16    0.24
  -6   5   3    3.83    0.55
  -5  -5   3    1.08    0.14
   5  -5  -3    0.84    0.15
  -5  -5   3    0.69    0.20
   5  -5  -3    0.83    0.14
  -5  -5   3    0.50    0.12
   5   5  -3    0.48    0.14
  -5   5   3    0.89    0.23
  -5   5   3    0.85    0.17
  -5   5   3    0.93    0.14
  -4  -5   3   10.83    0.37
  -4  -5   3   10.42    0.29
  -4  -5   3    9.98    0.25
   4  -5  -3    9.92    0.32
  -4  -5   3   10.22    0.33
   4  -5  -3   10.07    0.30
  -4   5   3   10.47    0.31
  -4   5   3   10.03    0.35
  -4   5   3   10.51    0.41
   3  -5  -3    8.09    0.27
  -3  -5   3    7.74    0.31
  -3  -5   3    8.31    0.30
   3  -5  -3    7.91    0.29
  -3  -5   3    8.57    0.26
   3   5  -3    7.90    0.24
   3   5  -3    8.37    0.27
   3   5  -3    7.55    0.22
  -3   5   3    8.17    0.28
  -3   5   3    8.46    0.34
  -3   5   3    8.00    0.31
   2  -5  -3    4.65    0.21
  -2  -5   3    4.60    0.25
   2  -5  -3    4.77    0.25
  -2  -5   3    4.43    0.24
  -2  -5   3    4.73    0.21
   2   5  -3    4.58    0.20
   2   5  -3    4.70    0.15
   2   5  -3    4.56    0.23
  -2   5   3    4.62    0.22
  -2   5   3    4.87    0.26
   2   5  -3    4.68    0.26
  -2   5   3    4.78    0.26
  -1  -5   3   32.40    0.68
   1  -5  -3   33.17    0.67
  -1  -5   3   32.94    0.69
   1  -5  -3   32.56    0.69
   1  -5  -3   32.48    0.68
   1   5  -3   31.78    0.68
   1   5  -3   32.60    0.66
  -1   5   3   32.69    0.68
  -1   5   3   33.47    0.67
   1   5  -3   32.85    0.68
  -1   5   3   32.98    0.69
   0  -5   3    0.34    0.12
   0  -5   3    0.37    0.12
   0  -5  -3    0.60    0.12
   0  -5  -3    0.31    0.11
   0  -5  -3    0.45    0.14
   0  -5   3    0.35    0.14
   0   5   3    0.50    0.10
   0   5  -3    0.44    0.12
   0   5  -3    0.42    0.14
   0   5  -3    0.37    0.10
   0   5   3    0.40    0.14
   0   5   3    0.38    0.12
   0   5  -3    0.37    0.11
  -1  -5  -3    0.52    0.15
   1  -5   3    0.36    0.15
  -1  -5  -3    0.42    0.12
   1  -5   3    0.55    0.12
  -1  -5  -3    0.41    0.10
   1  -5   3    0.54    0.13
   1   5   3    0.24    0.11
  -1   5  -3    0.53    0.12
  -1   5  -3    0.61    0.13
  -1   5  -3    0.55    0.15
  -1   5  -3    0.56    0.13
   1   5   3    0.59    0.12
   1   5   3    0.27    0.14
  -2  -5  -3    9.44    0.33
   2  -5   3    9.57    0.32
  -2  -5  -3    9.58    0.30
   2  -5   3    9.71    0.34
  -2  -5  -3    9.56    0.25
   2  -5   3    9.67    0.29
   2   5   3    9.51    0.33
  -2   5  -3    9.24    0.30
  -2   5  -3    9.74    0.34
   2   5   3    9.62    0.30
   2   5   3    9.86    0.30
  -2   5  -3    9.34    0.33
  -2   5  -3    9.61    0.29
   3  -5   3  110.69    2.06
   3  -5   3  108.39    2.05
  -3  -5  -3  109.25    2.04
  -3  -5  -3  108.94    2.04
   3  -5   3  110.17    2.03
  -3  -5  -3  111.23    2.06
   3   5   3  108.69    2.05
   3   5   3  110.29    2.05
  -3   5  -3  109.21    2.08
  -3   5  -3  107.42    2.04
  -3   5  -3  109.88    2.03
   3   5   3  111.11    2.04
  -3   5  -3  108.84    2.06
  -4  -5  -3    0.46    0.14
   4  -5   3    0.43    0.15
  -4  -5  -3    0.57    0.19
  -4  -5  -3    0.37    0.15
   4  -5   3    0.77    0.18
   4  -5   3    0.58    0.20
   4   5   3    0.36    0.15
   4   5   3    0.49    0.18
  -4   5  -3    0.09    0.18
  -4   5  -3    0.61    0.14
  -4   5  -3    0.41    0.19
   4   5   3    0.41    0.15
  -4   5  -3    0.44    0.16
   5  -5   3   -0.05    0.18
  -5  -5  -3    0.09    0.14
   5  -5   3    0.12    0.16
  -5  -5  -3   -0.01    0.14
  -5  -5  -3   -0.14    0.17
   5  -5   3    0.27    0.17
  -5   5  -3    0.10    0.16
   5   5   3    0.20    0.15
   5   5   3    0.09    0.17
  -5   5  -3    0.26    0.19
   5   5   3    0.13    0.18
  -5   5  -3    0.00    0.13
  -5   5  -3    0.05    0.19
  -6  -5  -3   12.15    0.38
   6  -5   3   11.53    0.40
  -6  -5  -3   11.18    0.36
   6  -5   3   11.79    0.39
  -6  -5  -3   11.41    0.40
   6   5   3   11.79    0.42
  -6   5  -3   11.51    0.34
   6   5   3   11.58    0.36
  -6   5  -3   11.67    0.41
   6   5   3   11.75    0.38
  -6   5  -3   11.93    0.47
  -6   5  -3   11.89    0.38
  -7  -5  -3    0.54    0.21
  -7  -5  -3    0.34    0.16
  -7  -5  -3    0.78    0.19
   7  -5   3    0.69    0.20
   7   5   3    0.75    0.22
  -7   5  -3    0.66    0.17
  -7   5  -3    0.54    0.22
  -7   5  -3    0.74    0.25
   7   5   3    0.75    0.17
   7   5   3    0.60    0.19
   8  -5   3    1.49    0.24
  -8  -5  -3    1.40    0.22
  -8  -5  -3    1.38    0.21
   8  -5   3    1.52    0.24
  -8   5  -3    1.37    0.25
   8   5   3    1.42    0.21
  -8   5  -3    1.52    0.26
   8   5   3    1.59    0.20
  -8   5  -3    0.99    0.27
  -8   5  -3    1.62    0.21
   8   5   3    1.43    0.29
  -9  -5  -3   22.21    0.63
   9  -5   3   22.07    0.58
   9  -5   3   21.54    0.58
  -9  -5  -3   22.59    0.59
  -9   5  -3   19.41    1.02
  -9   5  -3   21.14    0.64
  -9   5  -3   22.68    0.65
  -9   5  -3   22.27    0.61
 -10  -5  -3    0.20    0.23
  10  -5   3    0.08    0.23
 -10  -5  -3   -0.28    0.21
 -10   5  -3    0.16    0.25
  10   5   3    0.26    0.28
 -10   5  -3    0.20    0.28
 -10   5  -3   -0.09    0.30
 -11  -5  -3    2.10    0.31
 -11  -5  -3    2.51    0.32
 -11  -5  -3    2.71    0.38
 -11   5  -3    2.27    0.27
 -11   5  -3    2.52    0.31
 -11   5  -3    1.94    0.37
  11   5   3    2.20    0.42
 -12  -5  -3    5.06    0.47
 -12  -5  -3    4.37    0.48
 -12   5  -3    4.90    0.45
 -12   5  -3    5.04    0.59
 -12   5  -3    5.41    0.49
 -12   5  -3    4.89    0.41
 -13  -5  -3   10.59    0.59
 -13  -5  -3    9.93    0.54
 -13  -5  -3    9.79    0.55
 -13   5  -3    8.70    0.55
 -13   5  -3   10.68    0.78
 -13   5  -3    8.65    0.65
  13   5   3   10.12    0.74
 -13   5  -3   10.28    0.50
 -14  -5  -3    1.72    0.44
 -14  -5  -3    1.00    0.38
 -14  -5  -3    2.68    0.39
 -14   5  -3    1.91    0.54
 -14   5  -3    1.96    0.41
 -14   5  -3    3.42    0.52
 -14  -6   3    1.01    0.34
 -14  -6   3    1.12    0.40
 -14  -6   3    1.30    0.31
 -14   6   3    0.52    0.40
 -14   6   3    0.61    0.37
 -14   6   3    0.30    0.48
 -13  -6   3    1.12    0.28
 -13  -6   3    0.94    0.33
 -13  -6   3    1.47    0.51
 -13  -6   3    1.10    0.40
 -13   6   3    0.91    0.30
 -13   6   3    1.13    0.50
 -13   6   3    1.38    0.23
 -12  -6   3   10.56    0.61
 -12  -6   3   11.55    0.44
 -12  -6   3   11.54    0.49
 -12  -6   3   11.48    0.54
 -12   6   3    9.50    0.81
 -12   6   3   11.20    0.72
 -12   6   3   11.45    0.54
 -12   6   3   10.75    0.47
 -11  -6   3    0.21    0.26
 -11  -6   3   -0.01    0.21
 -11  -6   3    0.62    0.35
 -11  -6   3   -0.03    0.26
 -11  -6   3    0.17    0.20
 -11   6   3    0.09    0.24
 -11   6   3    0.52    0.36
 -11   6   3   -0.15    0.27
  11   6  -3    0.21    0.33
 -10  -6   3    1.24    0.23
 -10  -6   3    1.05    0.29
 -10  -6   3    0.85    0.33
 -10  -6   3    1.10    0.22
 -10  -6   3    0.85    0.19
  10   6  -3    0.69    0.30
 -10   6   3    0.61    0.22
 -10   6   3    0.76    0.26
  -9  -6   3    2.88    0.27
  -9  -6   3    2.94    0.28
  -9  -6   3    1.99    0.31
  -9  -6   3    2.57    0.32
  -9  -6   3    3.12    0.35
  -9   6   3    2.87    0.33
   9   6  -3    2.79    0.36
  -9   6   3    2.89    0.36
  -9   6   3    3.26    0.57
  -8  -6   3    1.50    0.30
  -8  -6   3    1.29    0.21
  -8  -6   3    1.21    0.20
  -8  -6   3    1.30    0.18
  -8  -6   3    1.39    0.19
  -8   6   3    1.52    0.31
  -8   6   3    1.49    0.35
  -8   6   3    1.37    0.23
   8   6  -3    0.82    0.22
  -8   6   3    1.34    0.21
  -7  -6   3   13.99    0.42
  -7  -6   3   14.35    0.39
  -7  -6   3   13.78    0.38
  -7  -6   3   14.17    0.51
  -7  -6   3   14.72    0.39
  -7   6   3   14.30    0.60
  -7   6   3   14.66    0.45
   7   6  -3   13.57    0.43
  -7   6   3   14.39    0.54
  -7   6   3   14.54    0.42
   6  -6  -3   13.90    0.37
  -6  -6   3   14.39    0.48
  -6  -6   3   14.19    0.35
  -6  -6   3   13.35    0.41
  -6  -6   3   14.05    0.35
  -6  -6   3   13.86    0.37
   6  -6  -3   13.80    0.38
  -6   6   3   14.70    0.54
  -6   6   3   14.53    0.43
   6   6  -3   13.39    0.39
  -6   6   3   14.47    0.40
  -5  -6   3    0.36    0.10
  -5  -6   3    0.50    0.21
  -5  -6   3    0.52    0.14
   5  -6  -3    0.58    0.15
  -5  -6   3    0.30    0.09
   5  -6  -3    0.34    0.16
  -5  -6   3    0.11    0.17
  -5   6   3    0.33    0.16
  -5   6   3    0.59    0.23
  -5   6   3    0.50    0.19
   5   6  -3    0.34    0.14
   4  -6  -3    0.34    0.16
  -4  -6   3    0.33    0.17
  -4  -6   3    0.28    0.14
  -4  -6   3    0.48    0.17
   4  -6  -3    0.63    0.15
   4   6  -3    0.44    0.14
   4   6  -3    0.45    0.12
  -4   6   3    0.47    0.20
  -4   6   3    0.70    0.18
  -4   6   3    0.50    0.15
  -3  -6   3    0.09    0.14
   3  -6  -3   -0.12    0.14
  -3  -6   3   -0.01    0.17
   3  -6  -3   -0.12    0.17
  -3  -6   3    0.08    0.17
   3   6  -3    0.04    0.15
  -3   6   3    0.08    0.19
  -3   6   3    0.08    0.15
   3   6  -3   -0.14    0.12
  -3   6   3   -0.15    0.17
   2  -6  -3    0.35    0.17
  -2  -6   3    0.46    0.14
   2  -6  -3    0.53    0.10
  -2  -6   3    0.47    0.18
  -2  -6   3    0.67    0.17
   2  -6  -3    0.61    0.15
  -2   6   3    0.45    0.17
  -2   6   3    0.47    0.15
   2   6  -3    0.76    0.10
   2   6  -3    0.28    0.13
   2   6  -3    0.32    0.16
  -2   6   3    0.53    0.19
   2   6  -3    0.18    0.18
   1  -6  -3    0.00    0.14
  -1  -6   3   -0.01    0.13
  -1  -6   3    0.11    0.15
   1  -6  -3    0.01    0.17
   1  -6  -3   -0.11    0.12
  -1  -6   3   -0.20    0.16
  -1   6   3    0.10    0.18
   1   6  -3    0.27    0.17
  -1   6   3    0.03    0.14
  -1   6   3   -0.01    0.14
   1   6  -3    0.07    0.14
   1   6  -3    0.11    0.17
   0  -6   3   11.91    0.35
   0  -6  -3   12.16    0.38
   0  -6  -3   11.83    0.35
   0  -6   3   12.28    0.39
   0  -6  -3   11.17    0.34
   0  -6   3   11.94    0.36
   0   6   3   12.14    0.35
   0   6  -3   12.02    0.35
   0   6  -3   11.56    0.34
   0   6  -3   11.76    0.38
   0   6   3   11.49    0.39
   0   6   3   11.89    0.32
  -1  -6  -3    4.00    0.24
   1  -6   3    3.83    0.23
   1  -6   3    3.79    0.29
   1  -6   3    3.75    0.24
  -1  -6  -3    3.09    0.20
  -1  -6  -3    3.87    0.28
  -1   6  -3    4.34    0.24
  -1   6  -3    3.76    0.29
  -1   6  -3    3.80    0.25
   1   6   3    3.56    0.29
  -1   6  -3    3.62    0.24
   1   6   3    4.15    0.24
  -2  -6  -3  209.76    3.81
  -2  -6  -3  193.85    3.74
   2  -6   3  210.42    3.79
  -2  -6  -3  204.74    3.78
   2  -6   3  209.89    3.81
   2  -6   3  207.36    3.77
  -2   6  -3  206.26    3.81
   2   6   3  212.11    3.79
   2   6   3  210.70    3.78
  -2   6  -3  202.68    3.79
  -2   6  -3  209.99    3.78
   2   6   3  208.77    3.80
  -2   6  -3  210.36    3.81
  -3  -6  -3    0.25    0.15
  -3  -6  -3    0.23    0.09
   3  -6   3    0.31    0.20
  -3  -6  -3    0.02    0.18
   3  -6   3    0.06    0.17
   3  -6   3    0.04    0.15
  -3   6  -3    0.30    0.19
  -3   6  -3    0.50    0.20
  -3   6  -3    0.35    0.14
   3   6   3    0.14    0.17
   3   6   3    0.18    0.19
  -3   6  -3    0.24    0.16
   3   6   3    0.35    0.15
   4  -6   3   24.10    0.60
   4  -6   3   24.06    0.54
  -4  -6  -3   23.69    0.55
  -4  -6  -3   24.31    0.59
  -4  -6  -3   23.90    0.55
   4  -6   3   24.22    0.58
   4   6   3   24.61    0.57
  -4   6  -3   23.60    0.57
   4   6   3   23.51    0.58
  -4   6  -3   24.04    0.53
  -4   6  -3   23.64    0.62
   4   6   3   23.81    0.56
  -4   6  -3   23.74    0.60
  -5  -6  -3    3.81    0.31
  -5  -6  -3    4.06    0.25
  -5  -6  -3    3.69    0.26
   5  -6   3    3.59    0.32
   5  -6   3    4.00    0.29
   5  -6   3    3.72    0.25
  -5   6  -3    3.95    0.23
   5   6   3    3.92    0.29
   5   6   3    3.77    0.26
   5   6   3    3.51    0.30
  -5   6  -3    3.88    0.32
  -5   6  -3    3.45    0.34
  -5   6  -3    4.21    0.28
  -6  -6  -3   26.75    0.63
  -6  -6  -3   26.48    0.63
  -6  -6  -3   26.66    0.66
   6  -6   3   26.62    0.62
   6  -6   3   26.67    0.66
   6  -6   3   26.79    0.64
  -6   6  -3   27.69    0.83
   6   6   3   26.19    0.63
   6   6   3   26.07    0.67
  -6   6  -3   26.55    0.60
  -6   6  -3   26.89    0.67
  -6   6  -3   27.01    0.73
  -7  -6  -3   12.00    0.41
  -7  -6  -3   11.42    0.40
   7  -6   3   12.04    0.43
   7  -6   3   11.51    0.54
  -7   6  -3   11.39    0.37
   7   6   3   11.23    0.41
  -7   6  -3   11.03    0.50
   7   6   3   11.48    0.39
  -7   6  -3   11.97    0.53
  -7   6  -3   11.57    0.46
   8  -6   3   24.29    0.63
  -8  -6  -3   23.66    0.62
  -8  -6  -3   23.73    0.63
   8  -6   3   24.44    0.64
  -8  -6  -3   23.30    0.68
  -8   6  -3   24.21    0.76
  -8   6  -3   23.99    0.67
  -8   6  -3   24.20    0.64
  -8   6  -3   24.28    0.59
   8   6   3   23.54    0.59
  -9  -6  -3    2.02    0.26
  -9  -6  -3    1.99    0.29
   9  -6   3    1.93    0.28
  -9  -6  -3    1.79    0.25
   9  -6   3    1.89    0.28
  -9   6  -3    2.03    0.33
  -9   6  -3    1.68    0.28
   9   6   3    1.45    0.29
  -9   6  -3    1.59    0.28
  -9   6  -3    1.51    0.32
  10  -6   3   19.48    0.58
  10  -6   3   19.28    0.58
 -10  -6  -3   19.32    0.59
 -10  -6  -3   19.71    0.62
  10   6   3   20.07    0.71
 -10   6  -3   18.94    0.63
 -10   6  -3   19.46    0.61
 -10   6  -3   19.68    0.76
 -10   6  -3   19.88    0.67
 -11  -6  -3    1.01    0.31
 -11  -6  -3    0.57    0.30
 -11   6  -3    0.86    0.28
 -11   6  -3    0.89    0.33
 -11   6  -3    1.19    0.41
 -11   6  -3    1.11    0.26
  11   6   3    0.78    0.36
 -12  -6  -3   11.73    0.58
 -12  -6  -3   12.01    0.56
 -12  -6  -3   12.19    0.56
 -12   6  -3   11.71    0.50
 -12   6  -3   11.57    0.55
 -12   6  -3   13.00    0.73
 -12   6  -3   12.94    0.60
 -13  -6  -3   -0.38    0.38
 -13  -6  -3    0.57    0.34
 -13  -6  -3    0.65    0.32
  13   6   3    1.57    0.54
 -13   6  -3    1.02    0.31
 -13   6  -3    0.28    0.38
 -13   6  -3    1.01    0.37
 -14  -6  -3    4.55    0.60
 -14  -6  -3    6.38    0.57
 -14  -6  -3    6.14    0.68
 -14   6  -3    4.65    0.64
 -14   6  -3    6.40    0.55
 -14   6  -3    5.28    0.64
 -14   6  -3    6.68    0.81
 -14  -7   3    2.19    0.50
 -14  -7   3    2.29    0.34
 -14   7   3    2.51    0.55
 -14   7   3    2.37    0.40
 -14   7   3    4.04    0.57
 -13  -7   3   -0.06    0.45
 -13  -7   3    0.47    0.28
 -13  -7   3    0.68    0.33
 -13  -7   3    0.63    0.44
 -13  -7   3    0.80    0.33
 -13   7   3    0.18    0.29
 -13   7   3    0.02    0.34
 -13   7   3    0.46    0.48
 -12  -7   3    1.14    0.26
 -12  -7   3    1.33    0.37
 -12  -7   3    1.55    0.26
 -12  -7   3    1.67    0.40
  12   7  -3    1.22    0.38
 -12   7   3    1.14    0.27
 -12   7   3    1.65    0.42
 -11  -7   3    5.13    0.52
 -11  -7   3    6.16    0.38
 -11  -7   3    6.01    0.41
 -11  -7   3    6.54    0.41
 -11  -7   3    6.41    0.37
 -11   7   3    5.38    0.41
 -11   7   3    6.80    0.49
 -11   7   3    5.81    0.65
 -10  -7   3   -0.08    0.21
 -10  -7   3   -0.04    0.25
 -10  -7   3    0.22    0.19
 -10  -7   3   -0.27    0.31
 -10  -7   3    0.01    0.20
 -10   7   3    0.37    0.41
 -10   7   3   -0.28    0.25
  10   7  -3    0.00    0.28
 -10   7   3    0.07    0.24
  -9  -7   3    0.34    0.20
  -9  -7   3    0.34    0.19
  -9  -7   3    0.35    0.18
  -9  -7   3    0.30    0.29
  -9  -7   3    0.34    0.24
  -9   7   3    0.78    0.33
   9   7  -3    0.12    0.23
  -9   7   3    0.55    0.26
  -8  -7   3   11.05    0.43
  -8  -7   3   10.65    0.35
  -8  -7   3   10.93    0.38
  -8  -7   3   11.39    0.35
  -8  -7   3   10.51    0.51
   8   7  -3   10.58    0.43
  -8   7   3   10.73    0.56
  -8   7   3   11.12    0.46
  -8   7   3   11.20    0.42
  -8   7   3   12.25    0.62
   7  -7  -3    4.27    0.28
   7  -7  -3    4.56    0.29
  -7  -7   3    4.13    0.39
  -7  -7   3    4.34    0.23
  -7  -7   3    4.11    0.28
  -7  -7   3    4.28    0.24
  -7  -7   3    3.69    0.34
  -7   7   3    4.49    0.36
  -7   7   3    5.41    0.50
  -7   7   3    4.73    0.45
   7   7  -3    3.96    0.30
  -7   7   3    4.41    0.36
  -6  -7   3    0.24    0.11
   6  -7  -3    0.14    0.18
  -6  -7   3    0.23    0.10
  -6  -7   3    0.16    0.21
  -6  -7   3    0.05    0.20
  -6  -7   3    0.10    0.16
   6  -7  -3    0.33    0.17
   6   7  -3    0.43    0.16
  -6   7   3    0.37    0.21
  -6   7   3    0.31    0.18
  -5  -7   3   11.35    0.35
  -5  -7   3   11.63    0.42
   5  -7  -3   11.47    0.35
   5  -7  -3   11.09    0.40
  -5  -7   3   11.51    0.40
  -5   7   3   11.38    0.71
   5   7  -3   10.80    0.31
  -5   7   3   11.54    0.42
   5   7  -3   10.77    0.33
  -5   7   3   11.12    0.37
   5   7  -3   10.85    0.32
  -4  -7   3    2.00    0.22
   4  -7  -3    2.43    0.24
  -4  -7   3    1.84    0.23
  -4  -7   3    1.92    0.23
   4  -7  -3    1.96    0.27
   4   7  -3    1.97    0.24
  -4   7   3    1.93    0.25
  -4   7   3    2.07    0.30
  -4   7   3    2.09    0.29
   4   7  -3    1.86    0.20
  -3  -7   3   39.47    0.84
   3  -7  -3   38.69    0.81
   3  -7  -3   38.68    0.83
  -3  -7   3   38.07    0.84
  -3  -7   3   38.59    0.80
   3   7  -3   38.83    0.79
  -3   7   3   39.26    0.85
  -3   7   3   39.65    0.82
  -3   7   3   39.38    0.86
   3   7  -3   38.26    0.81
   2  -7  -3    3.10    0.29
  -2  -7   3    3.50    0.24
   2  -7  -3    3.13    0.17
   2  -7  -3    3.16    0.23
  -2  -7   3    3.54    0.27
  -2  -7   3    3.07    0.29
  -2   7   3    3.30    0.30
   2   7  -3    3.54    0.16
   2   7  -3    2.93    0.23
  -2   7   3    3.04    0.27
   2   7  -3    3.22    0.27
  -2   7   3    3.02    0.25
  -1  -7   3   18.32    0.48
  -1  -7   3   18.76    0.51
   1  -7  -3   18.16    0.46
   1  -7  -3   18.33    0.43
   1  -7  -3   18.45    0.50
   1   7  -3   18.54    0.46
  -1   7   3   17.73    0.46
  -1   7   3   18.98    0.47
   1   7  -3   18.21    0.49
   1   7  -3   18.47    0.49
  -1   7   3   18.12    0.50
   0  -7   3   -0.14    0.16
   0  -7  -3   -0.16    0.14
   0  -7   3    0.22    0.16
   0  -7  -3    0.01    0.18
   0  -7   3    0.05    0.19
   0   7   3   -0.29    0.14
   0   7   3   -0.03    0.12
   0   7   3   -0.09    0.19
   0   7  -3   -0.26    0.16
   0   7  -3   -0.03    0.19
   0   7  -3   -0.11    0.17
  -1  -7  -3   22.21    0.53
  -1  -7  -3   20.92    0.50
   1  -7   3   22.79    0.53
   1  -7   3   23.21    0.58
  -1  -7  -3   22.86    0.58
  -1   7  -3   22.96    0.55
  -1   7  -3   23.38    0.54
   1   7   3   22.38    0.48
  -1   7  -3   22.56    0.54
   1   7   3   22.78    0.58
   1   7   3   22.81    0.54
  -1   7  -3   22.39    0.58
  -2  -7  -3   13.70    0.43
   2  -7   3   13.09    0.38
   2  -7   3   13.25    0.44
  -2  -7  -3   13.24    0.38
  -2  -7  -3   12.06    0.33
   2  -7   3   13.46    0.41
   2   7   3   13.68    0.43
  -2   7  -3   13.56    0.44
  -2   7  -3   13.62    0.40
   2   7   3   14.13    0.39
  -2   7  -3   13.07    0.37
   2   7   3   13.53    0.39
  -2   7  -3   13.18    0.42
   3  -7   3   26.84    0.63
  -3  -7  -3   25.32    0.53
  -3  -7  -3   26.67    0.61
   3  -7   3   27.02    0.59
  -3  -7  -3   26.30    0.64
   3  -7   3   27.09    0.65
  -3   7  -3   26.20    0.65
   3   7   3   26.47    0.61
   3   7   3   25.90    0.64
  -3   7  -3   26.76    0.66
  -3   7  -3   26.13    0.61
   3   7   3   27.19    0.61
  -3   7  -3   27.14    0.59
   4  -7   3    3.40    0.24
  -4  -7  -3    3.55    0.31
   4  -7   3    3.06    0.32
   4  -7   3    3.27    0.29
  -4  -7  -3    3.22    0.16
  -4  -7  -3    3.23    0.26
  -4   7  -3    3.29    0.31
  -4   7  -3    3.67    0.32
   4   7   3    3.40    0.27
  -4   7  -3    3.37    0.24
   4   7   3    3.24    0.30
   4   7   3    3.24    0.27
  -4   7  -3    3.10    0.34
   5  -7   3    2.39    0.25
  -5  -7  -3    3.00    0.31
   5  -7   3    2.50    0.30
  -5  -7  -3    2.58    0.23
   5  -7   3    2.76    0.33
  -5  -7  -3    2.87    0.26
  -5   7  -3    2.90    0.33
  -5   7  -3    3.04    0.24
   5   7   3    2.90    0.29
  -5   7  -3    2.73    0.36
   5   7   3    2.39    0.31
  -5   7  -3    2.68    0.28
   5   7   3    2.82    0.27
  -6  -7  -3    4.02    0.29
  -6  -7  -3    5.04    0.37
   6  -7   3    4.32    0.49
   6  -7   3    4.25    0.34
   6  -7   3    4.51    0.29
  -6  -7  -3    4.32    0.31
   6   7   3    3.82    0.33
  -6   7  -3    4.18    0.41
  -6   7  -3    4.58    0.27
  -6   7  -3    4.29    0.38
   6   7   3    4.29    0.32
   6   7   3    3.58    0.34
   7  -7   3    1.31    0.26
  -7  -7  -3    1.06    0.21
  -7  -7  -3    1.39    0.23
   7  -7   3    1.60    0.38
  -7   7  -3    1.46    0.28
  -7   7  -3    1.36    0.20
   7   7   3    1.19    0.24
  -7   7  -3    1.00    0.29
   7   7   3    1.21    0.22
   7   7   3    1.31    0.34
  -7   7  -3    1.42    0.26
   8  -7   3   11.75    0.56
  -8  -7  -3   10.64    0.48
  -8  -7  -3   10.98    0.44
  -8  -7  -3   11.49    0.44
   8  -7   3   11.05    0.48
   8   7   3   11.72    0.44
  -8   7  -3   11.10    0.52
   8   7   3   11.93    0.41
  -8   7  -3   11.44    0.47
  -8   7  -3   11.31    0.61
  -8   7  -3   11.76    0.40
   8   7   3   11.06    0.53
  -9  -7  -3   -0.39    0.25
  -9  -7  -3    0.27    0.21
   9  -7   3    0.61    0.46
   9  -7   3    0.30    0.28
  -9  -7  -3    0.32    0.24
  -9   7  -3    0.40    0.25
   9   7   3    0.85    0.27
  -9   7  -3    0.24    0.41
  -9   7  -3    0.05    0.34
   9   7   3    0.38    0.21
  -9   7  -3    0.34    0.28
   9   7   3    0.22    0.23
  10  -7   3    0.67    0.29
 -10  -7  -3    0.46    0.29
 -10  -7  -3    0.89    0.28
 -10  -7  -3    1.08    0.26
 -10   7  -3    0.85    0.31
 -10   7  -3    0.66    0.26
 -10   7  -3    0.01    0.27
 -10   7  -3    0.42    0.35
 -11  -7  -3    7.56    0.47
  11  -7   3    7.52    0.44
  11  -7   3    7.90    0.44
 -11  -7  -3    6.93    0.46
  11   7   3    7.41    0.59
 -11   7  -3    8.03    0.64
 -11   7  -3    7.24    0.55
 -11   7  -3    6.44    0.48
 -11   7  -3    7.52    0.41
 -12  -7  -3    0.37    0.29
 -12  -7  -3   -0.07    0.27
 -12   7  -3   -0.23    0.37
 -12   7  -3   -0.24    0.45
 -12   7  -3   -0.15    0.32
 -12   7  -3   -0.07    0.28
 -13  -7  -3   13.61    0.63
 -13  -7  -3   14.78    0.60
 -13  -7  -3   12.83    0.72
 -13   7  -3   10.86    0.67
 -13   7  -3   12.68    0.70
 -13   7  -3   13.92    0.57
 -13   7  -3   15.09    0.89
  13   7   3   11.36    0.87
 -14  -7  -3    2.18    0.36
 -14  -7  -3    1.49    0.37
 -14  -7  -3    1.85    0.52
 -14   7  -3    1.24    0.48
 -13  -8   3    0.63    0.38
 -13  -8   3    0.52    0.29
 -13  -8   3    0.75    0.36
 -13  -8   3    0.76    0.43
 -13   8   3    1.03    0.37
 -13   8   3    0.59    0.52
 -13   8   3    0.67    0.38
 -12  -8   3    5.20    0.41
 -12  -8   3    5.00    0.40
 -12  -8   3    4.39    0.50
 -12  -8   3    5.57    0.69
 -12  -8   3    3.83    0.58
 -12   8   3    3.95    0.52
 -12   8   3    5.03    0.70
 -12   8   3    4.31    0.44
  12   8  -3    3.12    0.42
 -11  -8   3    0.25    0.37
 -11  -8   3    0.57    0.23
 -11  -8   3    0.59    0.24
 -11  -8   3    1.12    0.30
 -11  -8   3    0.08    0.23
 -11   8   3   -0.02    0.25
 -11   8   3    0.32    0.35
 -11   8   3    0.54    0.37
  11   8  -3    0.02    0.36
 -11   8   3   -0.30    0.46
 -10  -8   3   13.99    0.64
 -10  -8   3   13.09    0.44
 -10  -8   3   13.46    0.43
 -10  -8   3   14.39    0.47
  10   8  -3   12.81    0.54
 -10   8   3   13.14    0.57
 -10   8   3   12.95    0.51
 -10   8   3   12.89    0.74
  -9  -8   3    0.59    0.19
  -9  -8   3   -0.06    0.21
  -9  -8   3    0.37    0.17
  -9  -8   3    0.42    0.32
  -9  -8   3    0.46    0.25
   9   8  -3    0.43    0.26
  -9   8   3    0.20    0.32
  -9   8   3    0.13    0.23
  -9   8   3    0.41    0.29
  -8  -8   3    0.59    0.16
  -8  -8   3    0.09    0.27
  -8  -8   3    0.44    0.21
  -8  -8   3    0.56    0.15
  -8  -8   3    0.60    0.39
  -8   8   3    1.21    0.38
   8   8  -3    0.61    0.22
  -8   8   3    0.88    0.26
  -8   8   3    0.71    0.33
  -8   8   3    0.88    0.25
  -7  -8   3    7.32    0.35
  -7  -8   3    7.22    0.41
   7  -8  -3    7.30    0.37
   7  -8  -3    7.69    0.35
  -7  -8   3    7.58    0.45
  -7  -8   3    7.55    0.28
  -7   8   3    8.00    0.53
  -7   8   3    7.38    0.43
  -7   8   3    7.69    0.51
   7   8  -3    7.38    0.35
   6  -8  -3    6.77    0.33
  -6  -8   3    6.77    0.41
  -6  -8   3    6.40    0.33
  -6  -8   3    6.40    0.38
   6  -8  -3    6.77    0.37
  -6   8   3    6.43    0.40
  -6   8   3    7.47    0.49
   6   8  -3    6.47    0.30
  -6   8   3    6.72    0.35
  -5  -8   3    1.87    0.27
  -5  -8   3    1.81    0.27
   5  -8  -3    1.79    0.27
  -5  -8   3    1.92    0.25
  -5   8   3    1.71    0.25
   5   8  -3    1.98    0.22
  -5   8   3    2.12    0.28
  -5   8   3    1.67    0.22
   5   8  -3    1.81    0.20
  -4  -8   3    7.80    0.32
  -4  -8   3    8.02    0.38
   4  -8  -3    7.85    0.37
   4  -8  -3    8.23    0.33
  -4  -8   3    8.38    0.38
   4   8  -3    7.84    0.26
   4   8  -3    8.14    0.37
   4   8  -3    7.84    0.34
  -4   8   3    7.89    0.39
  -4   8   3    8.31    0.42
  -3  -8   3    1.66    0.24
   3  -8  -3    2.04    0.26
  -3  -8   3    1.98    0.28
  -3  -8   3    1.89    0.24
   3  -8  -3    1.89    0.16
   3  -8  -3    2.20    0.30
  -3   8   3    2.20    0.30
  -3   8   3    1.82    0.25
  -3   8   3    2.24    0.27
   3   8  -3    1.88    0.28
   3   8  -3    1.86    0.23
  -2  -8   3   10.78    0.36
   2  -8  -3   10.89    0.41
   2  -8  -3   10.72    0.30
  -2  -8   3   11.00    0.39
   2  -8  -3   10.67    0.36
  -2  -8   3   10.96    0.41
   2   8  -3   11.19    0.28
   2   8  -3   10.75    0.39
   2   8  -3   10.98    0.35
  -2   8   3   10.82    0.38
  -2   8   3   11.01    0.37
  -2   8   3   10.67    0.42
  -1  -8   3    5.39    0.29
   1  -8  -3    5.53    0.24
  -1  -8   3    5.29    0.35
   1  -8  -3    4.95    0.33
  -1  -8   3    5.51    0.30
   1  -8  -3    5.31    0.28
   1   8  -3    5.09    0.32
  -1   8   3    5.77    0.34
   1   8  -3    5.37    0.33
  -1   8   3    5.05    0.27
  -1   8   3    5.46    0.29
   1   8  -3    5.46    0.28
   0  -8   3   -0.05    0.16
   0  -8  -3   -0.07    0.16
   0  -8   3    0.08    0.20
   0  -8  -3    0.00    0.18
   0  -8   3   -0.05    0.17
   0  -8  -3   -0.14    0.16
   0   8   3    0.08    0.14
   0   8  -3    0.17    0.19
   0   8  -3    0.17    0.19
   0   8   3   -0.12    0.14
   0   8   3    0.02    0.20
   0   8  -3   -0.04    0.16
   1  -8   3    4.32    0.26
   1  -8   3    3.83    0.28
   1  -8   3    4.12    0.33
  -1  -8  -3    4.34    0.27
  -1  -8  -3    4.40    0.33
  -1   8  -3    3.99    0.33
  -1   8  -3    4.60    0.28
   1   8   3    4.67    0.20
  -1   8  -3    4.11    0.29
  -1   8  -3    3.80    0.28
   1   8   3    4.43    0.33
   1   8   3    4.39    0.27
   2  -8   3   38.60    1.00
   2  -8   3   40.50    0.87
  -2  -8  -3   38.76    0.80
   2  -8   3   40.88    0.85
  -2  -8  -3   39.57    0.96
  -2  -8  -3   40.69    0.86
   2   8   3   42.14    0.87
  -2   8  -3   41.50    0.91
  -2   8  -3   41.23    1.02
  -2   8  -3   42.06    0.86
  -2   8  -3   41.22    0.89
   2   8   3   41.75    0.86
   2   8   3   41.07    0.90
   3  -8   3    0.93    0.17
  -3  -8  -3    1.31    0.37
  -3  -8  -3    0.98    0.16
  -3  -8  -3    0.86    0.17
   3  -8   3    1.22    0.28
   3  -8   3    0.86    0.19
  -3   8  -3    0.86    0.21
   3   8   3    1.13    0.18
  -3   8  -3    1.72    0.26
  -3   8  -3    1.31    0.24
   3   8   3    1.02    0.23
   3   8   3    1.15    0.19
  -3   8  -3    1.15    0.17
   4  -8   3    9.40    0.42
   4  -8   3    9.38    0.39
   4  -8   3    8.67    0.33
  -4  -8  -3    8.03    0.35
  -4  -8  -3    8.65    0.24
  -4  -8  -3    8.60    0.40
   4   8   3    9.00    0.41
  -4   8  -3    9.34    0.33
  -4   8  -3    8.44    0.53
  -4   8  -3    8.51    0.43
   4   8   3    9.20    0.36
   4   8   3    8.85    0.36
  -4   8  -3    9.11    0.42
   5  -8   3   13.41    0.49
   5  -8   3   12.89    0.40
  -5  -8  -3   12.62    0.43
   5  -8   3   13.49    0.47
  -5  -8  -3   11.10    0.67
  -5  -8  -3   12.95    0.32
   5   8   3   12.80    0.47
  -5   8  -3   13.07    0.50
  -5   8  -3   13.19    0.53
   5   8   3   12.59    0.43
  -5   8  -3   13.33    0.40
   5   8   3   13.10    0.46
  -5   8  -3   12.68    0.44
   6  -8   3    6.65    0.65
  -6  -8  -3    8.19    0.35
   6  -8   3    8.71    0.43
  -6  -8  -3    8.21    0.43
  -6  -8  -3    8.46    0.38
   6  -8   3    8.02    0.36
   6   8   3    7.62    0.41
   6   8   3    6.89    0.65
  -6   8  -3    8.18    0.34
  -6   8  -3    7.86    0.50
   6   8   3    7.71    0.37
  -6   8  -3    7.70    0.39
  -6   8  -3    8.28    0.45
  -7  -8  -3    0.30    0.21
   7  -8   3    0.29    0.26
  -7  -8  -3    0.01    0.16
  -7  -8  -3    0.24    0.28
   7  -8   3    0.08    0.38
  -7   8  -3    0.41    0.20
   7   8   3    0.30    0.22
  -7   8  -3    0.03    0.26
  -7   8  -3    0.22    0.30
  -7   8  -3    0.47    0.24
   7   8   3   -0.05    0.24
   7   8   3    0.33    0.25
  -8  -8  -3    0.82    0.22
  -8  -8  -3    0.74    0.25
  -8  -8  -3    0.60    0.30
   8  -8   3    0.65    0.28
   8  -8   3    0.95    0.30
   8   8   3    0.63    0.27
  -8   8  -3    0.23    0.28
  -8   8  -3    0.76    0.21
  -8   8  -3    0.12    0.30
  -8   8  -3    0.67    0.27
   8   8   3    0.75    0.26
   8   8   3    0.49    0.23
   9  -8   3    1.98    0.38
  -9  -8  -3    2.27    0.29
  -9  -8  -3    2.11    0.27
  -9  -8  -3    2.30    0.33
   9  -8   3    2.23    0.32
   9   8   3    2.35    0.34
   9   8   3    2.26    0.28
  -9   8  -3    2.59    0.41
  -9   8  -3    2.09    0.36
  -9   8  -3    1.68    0.30
   9   8   3    2.51    0.39
  -9   8  -3    1.52    0.36
 -10  -8  -3   -0.22    0.24
 -10  -8  -3    0.35    0.30
 -10  -8  -3    0.00    0.30
  10  -8   3    0.05    0.30
 -10   8  -3    0.25    0.36
  10   8   3    0.00    0.33
 -10   8  -3    0.19    0.37
 -10   8  -3   -0.34    0.39
 -10   8  -3   -0.32    0.24
 -11  -8  -3    0.66    0.28
  11  -8   3    1.05    0.43
 -11  -8  -3    0.96    0.34
 -11  -8  -3    1.09    0.32
  11  -8   3    1.11    0.32
 -11   8  -3    0.69    0.44
 -11   8  -3    0.99    0.26
  11   8   3    0.93    0.37
 -11   8  -3    1.08    0.36
 -11   8  -3    0.43    0.30
 -12  -8  -3    0.70    0.35
 -12  -8  -3    0.56    0.33
 -12   8  -3    1.41    0.39
 -12   8  -3    0.84    0.45
  12   8   3    0.21    0.53
 -12   8  -3    1.45    0.30
 -12   8  -3    0.51    0.38
 -13  -8  -3    1.36    0.48
 -13  -8  -3    0.56    0.37
 -13  -8  -3    0.21    0.35
 -13   8  -3    1.80    0.43
  13   8   3    0.94    0.54
 -13   8  -3   -0.02    0.49
 -13   8  -3    1.10    0.34
 -13  -9   3    1.34    0.32
 -13  -9   3   -0.54    0.58
 -13  -9   3    0.78    0.44
 -13  -9   3    0.53    0.29
 -13   9   3    0.57    0.61
 -13   9   3    0.79    0.40
 -13   9   3    0.41    0.45
 -12  -9   3    1.47    0.37
 -12  -9   3    1.40    0.26
 -12  -9   3    0.61    0.38
 -12  -9   3    0.03    0.49
 -12   9   3    1.06    0.39
 -12   9   3    1.15    0.51
 -12   9   3    1.00    0.40
  12   9  -3    1.42    0.39
 -11  -9   3    5.15    0.41
 -11  -9   3    4.18    0.39
 -11  -9   3    4.95    0.48
 -11  -9   3    4.36    0.34
 -11  -9   3    4.04    0.56
 -11   9   3    4.53    0.51
 -11   9   3    3.43    0.47
  11   9  -3    3.43    0.50
 -11   9   3    5.11    0.63
 -10  -9   3    1.97    0.28
 -10  -9   3    1.89    0.30
 -10  -9   3    1.56    0.27
 -10  -9   3    0.66    0.40
 -10   9   3    1.53    0.30
 -10   9   3    2.01    0.44
 -10   9   3    0.90    0.34
  10   9  -3    1.30    0.30
 -10   9   3    0.87    0.40
  -9  -9   3    5.38    0.52
  -9  -9   3    4.44    0.30
  -9  -9   3    4.93    0.37
  -9  -9   3    5.00    0.42
  -9   9   3    5.44    0.59
  -9   9   3    4.81    0.41
  -9   9   3    4.87    0.57
   9   9  -3    4.48    0.42
  -8  -9   3    0.79    0.34
  -8  -9   3    0.75    0.24
   8  -9  -3    0.92    0.23
   8  -9  -3    0.71    0.24
  -8  -9   3    0.96    0.33
  -8   9   3    0.54    0.33
   8   9  -3    0.88    0.22
  -8   9   3    0.85    0.30
  -8   9   3    0.69    0.26
  -8   9   3    0.84    0.36
  -7  -9   3    0.60    0.23
   7  -9  -3    0.94    0.24
   7  -9  -3    0.81    0.26
  -7  -9   3    0.66    0.37
  -7  -9   3    0.37    0.28
  -7   9   3    0.62    0.24
  -7   9   3    0.74    0.28
  -7   9   3    0.86    0.33
  -7   9   3    0.36    0.32
   6  -9  -3    2.08    0.31
  -6  -9   3    1.96    0.29
  -6  -9   3    2.05    0.25
  -6  -9   3    2.12    0.31
   6  -9  -3    2.18    0.27
   6   9  -3    1.92    0.27
   6   9  -3    1.71    0.24
   6   9  -3    2.10    0.23
  -6   9   3    2.38    0.34
  -6   9   3    1.80    0.24
  -6   9   3    2.57    0.31
   5  -9  -3    0.58    0.21
  -5  -9   3    0.13    0.21
  -5  -9   3    0.09    0.25
  -5  -9   3    0.45    0.25
  -5   9   3    0.70    0.26
   5   9  -3    0.58    0.19
  -5   9   3    0.32    0.21
   5   9  -3    0.39    0.22
  -5   9   3   -0.04    0.48
  -4  -9   3    3.53    0.36
   4  -9  -3    4.14    0.31
  -4  -9   3    4.52    0.39
  -4  -9   3    3.98    0.31
   4   9  -3    4.24    0.29
  -4   9   3    4.14    0.39
  -4   9   3    4.28    0.53
   4   9  -3    4.52    0.34
  -4   9   3    4.34    0.34
  -3  -9   3   23.89    0.65
   3  -9  -3   24.30    0.65
  -3  -9   3   22.99    0.62
   3  -9  -3   23.72    0.50
   3  -9  -3   23.72    0.59
  -3  -9   3   23.08    0.59
   3   9  -3   22.75    0.60
   3   9  -3   22.57    0.50
  -3   9   3   23.49    0.65
  -3   9   3   22.99    0.63
   3   9  -3   23.07    0.56
  -2  -9   3    0.53    0.22
  -2  -9   3    0.63    0.19
  -2  -9   3    0.44    0.24
   2  -9  -3    0.62    0.15
   2  -9  -3    0.76    0.19
   2  -9  -3    0.45    0.23
  -2   9   3    0.76    0.24
   2   9  -3    0.75    0.13
  -2   9   3    0.25    0.20
   2   9  -3    0.12    0.21
   2   9  -3    0.47    0.18
   1  -9  -3    0.16    0.15
  -1  -9   3    0.21    0.19
   1  -9  -3   -0.01    0.18
   1  -9  -3   -0.11    0.22
  -1  -9   3   -0.07    0.22
  -1  -9   3    0.00    0.17
   1   9  -3   -0.09    0.18
  -1   9   3   -0.19    0.15
  -1   9   3   -0.14    0.21
   1   9  -3   -0.23    0.20
  -1   9   3   -0.12    0.17
   0  -9   3    0.12    0.19
   0  -9  -3   -0.15    0.21
   0  -9  -3    0.14    0.17
   0  -9   3    0.01    0.21
   0  -9   3    0.18    0.18
   0  -9  -3    0.09    0.16
   0   9  -3    0.25    0.21
   0   9   3   -0.19    0.16
   0   9   3    0.11    0.13
   0   9  -3    0.13    0.21
   0   9   3    0.10    0.23
   0   9  -3   -0.10    0.20
  -1  -9  -3    1.02    0.21
  -1  -9  -3    1.02    0.19
   1  -9   3    1.11    0.20
   1  -9   3    0.85    0.24
   1  -9   3    1.21    0.19
  -1  -9  -3    0.87    0.23
  -1   9  -3    0.96    0.23
   1   9   3    1.05    0.23
  -1   9  -3    0.63    0.19
  -1   9  -3    0.89    0.20
   1   9   3    1.30    0.20
   1   9   3    1.08    0.18
  -2  -9  -3    7.39    0.34
   2  -9   3    7.66    0.32
   2  -9   3    7.60    0.37
  -2   9  -3    7.24    0.40
  -2   9  -3    7.87    0.38
   2   9   3    7.85    0.35
   2   9   3    7.95    0.33
  -2   9  -3    7.79    0.33
   2   9   3    7.59    0.40
   3  -9   3   12.50    0.39
  -3  -9  -3   12.55    0.48
  -3  -9  -3   12.81    0.42
   3  -9   3   12.46    0.46
   3  -9   3   12.13    0.50
   3   9   3   12.56    0.43
   3   9   3   12.82    0.42
   3   9   3   12.47    0.47
  -3   9  -3   12.26    0.48
  -3   9  -3   12.55    0.40
  -3   9  -3   11.94    0.43
  -3   9  -3   12.67    0.49
  -4  -9  -3    6.23    0.36
  -4  -9  -3    6.20    0.42
   4  -9   3    6.52    0.39
   4  -9   3    6.61    0.43
   4  -9   3    6.60    0.32
  -4   9  -3    7.26    0.38
   4   9   3    6.17    0.36
  -4   9  -3    6.85    0.43
  -4   9  -3    7.13    0.45
   4   9   3    6.52    0.42
  -4   9  -3    7.30    0.33
  -5  -9  -3    2.94    0.40
  -5  -9  -3    2.90    0.32
   5  -9   3    2.97    0.41
   5  -9   3    3.11    0.30
   5  -9   3    3.47    0.38
   5   9   3    3.23    0.38
  -5   9  -3    4.24    0.43
  -5   9  -3    3.61    0.30
   5   9   3    3.24    0.35
  -5   9  -3    3.29    0.45
   5   9   3    3.62    0.40
  -5   9  -3    3.50    0.35
  -6  -9  -3    7.37    0.39
   6  -9   3    8.34    0.47
   6  -9   3    7.68    0.37
  -6  -9  -3    7.25    0.45
   6  -9   3    8.54    0.46
  -6   9  -3    7.81    0.54
   6   9   3    7.69    0.39
  -6   9  -3    8.22    0.36
   6   9   3    8.10    0.42
  -6   9  -3    7.69    0.48
   6   9   3    7.64    0.45
  -6   9  -3    7.59    0.42
  -7  -9  -3    2.01    0.35
   7  -9   3    1.57    0.31
   7  -9   3    1.45    0.31
  -7  -9  -3    1.45    0.26
   7  -9   3    1.56    0.26
   7   9   3    1.38    0.29
  -7   9  -3    1.42    0.35
   7   9   3    1.49    0.27
  -7   9  -3    1.65    0.24
   7   9   3    0.92    0.36
  -7   9  -3    1.09    0.27
   8  -9   3    1.13    0.31
  -8  -9  -3    0.99    0.32
   8  -9   3    0.26    0.29
  -8  -9  -3    0.46    0.30
  -8  -9  -3    1.02    0.24
  -8   9  -3    1.09    0.23
  -8   9  -3    1.03    0.30
   8   9   3    0.88    0.28
  -8   9  -3    0.77    0.36
  -8   9  -3    1.37    0.35
   8   9   3    0.86    0.25
   9  -9   3    5.52    0.49
  -9  -9  -3    5.41    0.50
  -9  -9  -3    5.29    0.42
   9  -9   3    5.23    0.47
  -9  -9  -3    4.67    0.37
  -9   9  -3    5.11    0.45
   9   9   3    5.63    0.42
  -9   9  -3    5.68    0.36
  -9   9  -3    5.52    0.61
  -9   9  -3    5.35    0.53
   9   9   3    5.74    0.50
   9   9   3    5.81    0.40
  10  -9   3    2.08    0.33
 -10  -9  -3    1.66    0.31
  10  -9   3    1.80    0.36
 -10  -9  -3    1.01    0.45
 -10  -9  -3    1.49    0.34
 -10   9  -3    1.47    0.44
 -10   9  -3    1.26    0.36
 -10   9  -3    1.53    0.34
  10   9   3    1.40    0.38
  11  -9   3    3.17    0.38
 -11  -9  -3    3.30    0.43
 -11  -9  -3    2.94    0.34
  11  -9   3    2.97    0.40
 -11  -9  -3    2.49    0.34
 -11   9  -3    2.89    0.48
  11   9   3    2.40    0.51
 -11   9  -3    2.97    0.43
 -11   9  -3    2.25    0.39
 -11   9  -3    3.30    0.38
 -12  -9  -3    0.72    0.49
 -12  -9  -3    0.84    0.33
 -12  -9  -3    0.82    0.31
 -12   9  -3    0.93    0.50
  12   9   3    1.12    0.52
 -12   9  -3    0.91    0.48
 -12   9  -3    0.96    0.29
 -12   9  -3    1.31    0.45
 -13  -9  -3    1.95    0.36
 -13  -9  -3    3.37    0.52
 -13   9  -3    1.96    0.68
 -13   9  -3    2.15    0.52
  13   9   3    0.86    0.55
 -12 -10   3    8.45    0.51
 -12 -10   3    7.78    0.44
 -12 -10   3    7.51    0.68
 -12 -10   3    8.05    0.66
 -12  10   3    6.78    0.82
 -12  10   3    7.06    0.62
  12  10  -3    7.27    0.74
 -12  10   3    7.25    0.61
 -11 -10   3    0.27    0.38
 -11 -10   3    0.76    0.31
 -11 -10   3    0.94    0.35
  11  10  -3   -0.13    0.36
 -11  10   3   -0.34    0.36
 -11  10   3    0.59    0.36
 -10 -10   3    3.17    0.36
 -10  10   3    2.64    0.37
  10  10  -3    3.36    0.47
 -10  10   3    4.09    0.72
 -10  10   3    3.42    0.47
 -10  10   3    2.68    0.34
   9 -10  -3    3.04    0.40
  -9 -10   3    2.52    0.39
  -9 -10   3    2.57    0.34
   9 -10  -3    2.36    0.36
  -9 -10   3    2.12    0.29
  -9  10   3    2.41    0.38
   9  10  -3    2.07    0.30
  -9  10   3    2.22    0.33
  -9  10   3    2.78    0.44
  -8 -10   3    5.06    0.49
  -8 -10   3    4.91    0.40
  -8 -10   3    5.01    0.47
   8 -10  -3    5.34    0.39
  -8  10   3    5.31    0.49
  -8  10   3    5.47    0.57
  -8  10   3    4.07    0.41
   8  10  -3    4.78    0.37
  -7 -10   3    0.31    0.28
   7 -10  -3   -0.08    0.27
   7 -10  -3    0.04    0.25
  -7 -10   3   -0.17    0.30
  -7 -10   3   -0.06    0.24
  -7  10   3   -0.09    0.31
  -7  10   3   -0.01    0.27
   7  10  -3    0.36    0.21
  -7  10   3   -0.19    0.45
  -7  10   3   -0.47    0.23
  -6 -10   3    5.96    0.45
  -6 -10   3    6.95    0.45
  -6 -10   3    6.11    0.40
   6 -10  -3    5.77    0.39
  -6  10   3    5.55    0.40
  -6  10   3    5.16    0.51
  -6  10   3    5.79    0.46
   6  10  -3    5.60    0.32
   6  10  -3    6.15    0.38
   6  10  -3    5.83    0.32
   5 -10  -3    1.39    0.34
   5 -10  -3    1.73    0.26
  -5 -10   3    1.35    0.29
  -5 -10   3    1.04    0.29
  -5 -10   3    1.38    0.26
   5  10  -3    1.42    0.22
  -5  10   3    1.54    0.25
   5  10  -3    1.53    0.19
   5  10  -3    1.27    0.27
  -5  10   3    1.39    0.29
   4 -10  -3    0.19    0.14
  -4 -10   3    0.00    0.26
  -4 -10   3    0.37    0.24
   4 -10  -3    0.07    0.21
  -4 -10   3    0.19    0.27
   4 -10  -3    0.13    0.26
   4  10  -3    0.39    0.15
  -4  10   3   -0.01    0.29
[truncated: 1,752,757 more chars]
